# Supplementary material for: Accurate Prediction of Secreted Substrates and Identification of a Conserved Putative Secretion Signal for Type III Secretion Systems
Source: PLoS Pathog. 2009 Apr 24;5(4):e1000375. doi: 10.1371/journal.ppat.1000375 (PMC2668754; doi:10.1371/journal.ppat.1000375)
Supplement: Table S4 — Unaligned N-terminal Sequences of Secreted Effectors and Agreement with SIEVE Positional Biases. (0.04 MB XLS) [file ppat.1000375.s008.xls]

## Sheet: Sheet1
Table S4. Unaligned N-terminal Sequences of Secreted Effectors and Agreement with SIEVE Positional Biases.
Name	Sequence	SIEVE Bias Agreement
SIEVE	MgiIssxssnxspPPHxxxsESQAEsphxQ	MgiIssxssnxspPPHxxxsESQAEsphxQ
steC	MpftfqiGnhscqiserylrdiidnkreh	M------G---------------------
gtgE	MlrhiqnSlgsvyrsntatpqgQiihhrn	M------S--------------Q------
sopE-2	MtnItlstqhyrihrsdvepvkekttekd	M--I-------------------------
steA	MpytSvstYaralsgnklphvaagdyenk	M---S---Y--------------------
ssaB	MseegfmlavlkgiPliqdiraegnSrsw	M-------------P----------S---
orgC	MiPgtiptSylvPtadteaTgvvslSara	M-P-----S---P------T-----S---
sseJ	MplsvgqGYftSSissekfnaikesarlp	M------GY--SS----------------
spvB	MlIlNgfSSatlalitppflpkggkalsq	M-I-N--SS--------------------
sipB	MvndaSsiSrsgytqnprlaEaafEgvrk	M----S--S-----------E---E----
sspH-2	MpfhigsGclpatisnrriyriawsdtPp	M------G-------------------P-
slrP	MfnItniqSTarhqsisneastevplkee	M--I----ST-------------------
sipD	MlnIqnySaSpHPgivaerpqtpsaSeHv	M--I---S-S-HP------------S-H-
invJ	MGdvSavSSSgnillpqqdevgglsEalk	MG--S--SSS---------------E---
sseB	MssgNilwgSqnPivfknsfgvsnadtgs	M---N----S--P----------------
sseE	MvqeieqwlrrHqvftepaylgetaillg	M----------H-----------------
sseF	MkIhipsaaSnivdgnsppSdiQAkEvsf	M-I------S---------S--QA-E---
sopA	MkIsSgainfstiPnqvkklitsirEhtk	M-I-S--------P-----------E---
gogA	MpagikpifinnmmsiyglSnphdskvfp	M------------------S---------
sseC	MNrIhSnSdSaagvtalthhhlsnvScvs	MN-I-S-S-S---------------S---
sifA	MpItignGflkSeiltnsprntkeawwkv	M-I----G---S-----------------
pipB-2	MersldslagmaksafgagTsaamrqats	M------------------T---------
sopB	MqIqSfyhSaslktqeafkSlqktlyngm	M-I-S---S----------S---------
sipC	MlIsNvginpaaylnnhsvenSsqtaSqs	M-I-N----------------S----S--
gtgA	MclaeyliSgpggmdpdieidddtydecr	M-------S--------------------
sipA	MvtsvrtqppvimPgmqteiktQAtnlaa	M------------P--------QA-----
sseK-2	MarfNaaftrikimfsrirgliscqSntq	M---N--------------------S---
sptP	MlkyeerklNnltlssfskvgvsndarly	M--------N-------------------
pipB-1	MpItNaspeNilrylHaagTgtkeamksa	M-I-N----N-----H---T---------
sseK-1	MiPplnryvpalSknelvkTvtnrdiqft	M-P---------S------T---------
sopD-2	MpvtlSfGnrhnyeinhsrlarlmspdke	M----S-G---------------------
sopD-1	MpvtlSfGnhqnytlnesrlahllsadke	M----S-G---------------------
gogB	MtyrlkkrmkigfqPailqyaytsnEats	M-------------P----------E---
avrA	MifsvqelScggksmlsptTrnmgaSlsp	M-------S----------T-----S---
sifB	MpItigrGflkSemfsqsaisqrsfftll	M-I----G---S-----------------
sseG	MkPvSpnaqvggqrPvnapeESppcpSlp	M-P-S---------P-----ES----S--
sseD	MeasNvalvlpaPslltpsStpspsgegm	M---N-------P------S---------
sseI	MpfhigsGclpaiisnrriyriawsdtPp	M------G-------------------P-
P. syringae effectors
Name	Sequence	SIEVE Bias Agreement
SIEVE	MPISnGSgsxxgyMSNxPktxTSxSSExPx	MPISnGSgsxxgyMSNxPktxTSxSSExPx
hopX1	MrIhsaghSlpAPgpsvetTekavqSssa	M-I-----S--AP------T-----S---
hopAN1	MslnNarpllgciaddftgatdlanmlvr	M---N------------------------
hopAH2	MnIrsdrSydplmaarekpvmagrttrav	M-I----S---------------------
avrD1	MqdlsfStienhlgpakdrffgdgfkhve	M-----S----------------------
hopAJ1	MrsrvitpSlvviMlacasaapacfatdm	M-------S----M---------------
hopAJ2	MPsrfthrpqlrqliaasslvalvacaek	MP---------------------------
hopW1-1	MnparitcfphsfppsfsrTssSaensha	M------------------T--S------
hopV1	MrldaaqGqrplPpmdaPsslrlraSgts	M------G----P----P-------S---
hopAF1	MglcIskhSgssYsysdrdhwevpvnpsn	M---I---S---Y----------------
hopAV1	MikaNswSSnlNayrilqEpqslteeppP	M---N--SS--N------E---------P
HopAB1	MPgiNGaGpsnffwqwrtdgepvterEhd	MP--NG-G------------------E--
hopQ1	MhrpItaGhttsrlildqlkqiSrtpses	M---I--G--------------S------
avrB4-1	MgcitskplvssPqwhnsaTnsenletgq	M-----------P------T---------
avrB4-2	MgcitskplvssPrwhnsaTnsenletgq	M-----------P------T---------
hrpW1	MsIgItptpyqptsaaldfsalSekSpqt	M-I-I-----------------S--S---
hopAT1	MvgiNnwSSnldayrilqEaqslteepph	M---N--SS---------E----------
hopI1	MinltsiaSslArvalsdsTkptidraln	M-------S--A-------T---------
hopD1	Mnplrsiqhnittppisggqpldavgpqa	M----------------------------
hopJ1	MtdlNslrtslrsgehvfadtlafiaEgy	M---N---------------------E--
hopG1	MqIrNshlysasrlvqntfnasStkeaan	M-I-N-----------------S------
hopAS1	MtlrIntrSatpvvpletgsssqpevpsv	M---I---S--------------------
hopAK1	MnmitrnyypvsgqptqginpqadnSppP	M------------------------S--P
avrB2	MgnvcfrpSrshvsqefsqsefSaaSpvr	M-------S-------------S--S---
hrpK1	MrISsspSpalGsivNqPtsgelaaetpl	M-IS---S---G---N-P-----------
hopAU1	MkpvqsvSatqhYnpltnlgqeascShei	M------S----Y------------S---
hrpZ1	MqslslnSStlqspSmalvlirpetettg	M------SS-----S--------------
avrRps4	MnristSSvnssfsysaPaeeaqnrvssa	M-----SS---------P-----------
hopF3	MgIcasSSrnqyspavsntcspqhvashg	M-I---SS---------------------
hrpA2	MnImssltNagrgvvNtvggaaqginsvk	M-I-----N------N-------------
avrE1	MhsSsihrNtgciiqppapanTnaatdlq	M--S----N------------T-------
hopR1	MvkvtsSGftaNPlphhadsvspanSppq	M-----SG---NP------------S---
hopAE1	MmpSqitrSshsslpevapasgdatgvse	M--S----S--------------------
