# Supplementary material for: Accurate Prediction of Secreted Substrates and Identification of a Conserved Putative Secretion Signal for Type III Secretion Systems
Source: PLoS Pathog. 2009 Apr 24;5(4):e1000375. doi: 10.1371/journal.ppat.1000375 (PMC2668754; doi:10.1371/journal.ppat.1000375)
Supplement: Table S5 — Complete geneome SIEVE predictions for S. Typhimurium, P. syringae, C. trachomatis, S. flexneri, V. cholerae, and Y. pestis. (4.15 MB XLS) [file ppat.1000375.s009.xls]

## Sheet: Information
For each organism the source accession numbers are listed.
Proteins in bold are at or above 90% confidence by the 'generous' SIEVE estimate from Figure S3A.
Columns in each tab are as follows:
BIOID: identifer in the Bioverse database (http://bioverse.compbio.washington.edu)
ID: species-specific identifier
Name: gene name
Description: description of gene/protein
SIEVE score: 'raw' SVM discriminant from SIEVE model
SIEVE zscore: normalized score from SIEVE model (zscore)
Class: known secreted protein (1) or not (0)
Chlamydia predictions include the following additional columns:
Genbank ID
GI: geneinfo (NCBI) identifier
Salmonella predictions include scores for several different SIEVE models and additional columns:
STMtoSTM: a model trained on Salmonella effectors only
PSYtoSTM: a model trained on P. syringae effectors only
PSYpSTMtoSTM: a model trained on P. syringae and S. Typhimurium effectors
MeanZscores: the mean of Zscores from the STMtoSTM and PSYtoSTM models
%GC: GC content of the cognate gene
Ecoli: percentage sequence identity of the closest homolog in non-pathogenic E. coli k12
Mamm: percentage sequence identity of the closest homolog in M. musculus
Lawley/Monack: gene identified in a negative selection screen from Lawley TD, Chan K, Thompson LJ, Kim CC, Govoni GR, et al. (2006) Genome-wide screen for Salmonella genes required for long-term systemic infection of the mouse. PLoS Pathog 2: e11.
Chan/Falkow Macrophage: gene identified in a negative selection screen using macrophages from; Chan K, Kim CC, Falkow S (2005) Microarray-based detection of Salmonella enterica serovar Typhimurium transposon mutants that cannot survive in macrophages and mice. Infect Immun 73: 5438-5449.
Chan/Falkow mouse: gene identified in a negative selection screen using mice from; Chan K, Kim CC, Falkow S (2005) Microarray-based detection of Salmonella enterica serovar Typhimurium transposon mutants that cannot survive in macrophages and mice. Infect Immun 73: 5438-5449.
Chae/Morgan: gene identified in a negative genetic screen; Morgan E, Campbell JD, Rowe SC, Bispham J, Stevens MP, et al. (2004) Identification of host-specific colonization factors of Salmonella enterica serovar Typhimurium. Mol Microbiol 54: 994-1010.
Shah/Chan: gene identified in a negative genetic screen; Shah DH, Lee MJ, Park JH, Lee JH, Eo SK, et al. (2005) Identification of Salmonella gallinarum virulence genes in a chicken infection model using PCR-based signature-tagged mutagenesis. Microbiology 151: 3957-3968.
VirSum: sum of negative genetic screen findings for genes essential in virulence

## Sheet: C. trachomatis
Source: Chlamydia trachomatis D/UW-3/CX (AE001273)
BioID	ID	Name	Description	SIEVE score	SIEVE zscore	Genbank ID	gi
890	CT868	-	Membrane Thiol Protease (predicted)	1.27279	4.16782	NP_220390.1	3329343
713	CT694	-	hypothetical protein	0.86978	3.52271	NP_220213.1	3329148
109	CT105	-	hypothetical protein	0.81468	3.43451	NP_219608.1	3328502
593	CT578	-	hypothetical protein	0.73632	3.30908		3329020
889	CT867	-	Membrane Thiol Protease (predicted)	0.55471	3.01837	NP_220389.1	3329341
469	CT456	-	hypothetical protein	0.42756	2.81484	NP_219969.1	3328889
755	CT736	ybcL	hypothetical protein	0.38746	2.75065	NP_220255.1	3329194
233	CT228	-	hypothetical protein	0.29657	2.60516	NP_219733.1	3328637
86	CT082	-	hypothetical protein	0.27565	2.57168	NP_219585.1	3328477
332	CT326	-	hypothetical protein	0.20368	2.45647	NP_219831.1	3328744
374	CT365	-	hypothetical protein	0.19568	2.44367	NP_219874.1	3328788
161	CT157	-	Phospholipase D Endonuclease Superfamily	0.1826	2.42273	NP_219660.1	3328559
185	CT181	-	hypothetical protein	0.17016	2.40282	NP_219685.1	3328585
238	CT233	incC	Inclusion Membrane Protein C	0.15841	2.38401	NP_219738.1	3328642
402	CT392	yprS	hypothetical protein	0.14591	2.364	NP_219902.1	3328818
714	CT695	-	hypothetical protein	0.09181	2.2774	NP_220214.1	3329149
54	CT050	-	hypothetical protein	0.08137	2.26069	NP_219553.1	3328442
868	CT847	-	hypothetical protein	0.04695	2.20559	NP_220368.1	3329319
633	CT616	-	hypothetical protein	0.03695	2.18958		3329062
168	CT164	-	hypothetical protein	0.0313	2.18054		3328567
737	CT718	-	hypothetical protein	0.01935	2.16141		3329174
496	CT483	-	hypothetical protein	-0.00638	2.12022	NP_219997.1	3328919
158	CT154	-	Phospholipase D Endonuclease Superfamily	-0.01729	2.10276	NP_219657.1	3328556
91	CT087	malQ	4-alpha glucanotransferase	-0.01943	2.09933	NP_219590.1	3328483
367	CT358	-	hypothetical protein	-0.05984	2.03465	NP_219867.1	3328781
730	CT711	-	hypothetical protein	-0.0928	1.98189	NP_220230.1	3329167
422	CT412	pmpA	Putative outer membrane protein A	-0.09947	1.97121	NP_219922.1	3328840
637	CT620	-	hypothetical protein	-0.10221	1.96683	NP_220137.1	3329066
234	CT229	-	hypothetical protein	-0.10585	1.961	NP_219734.1	3328638
814	CT795	-	hypothetical protein	-0.10677	1.95953	NP_220315.1	3329261
870	CT849	-	hypothetical protein	-0.12309	1.9334	NP_220370.1	3329321
92	CT088	sycE	Secretion Chaperone	-0.12371	1.93241	NP_219591.1	3328484
882	CT860	-	hypothetical protein	-0.13107	1.92063		3329334
639	CT622	-	CHLPN 76kDa Homolog	-0.13149	1.91996	NP_220139.1	3329069
170	CT166	-	hypothetical protein	-0.13881	1.90824	NP_219669.1	3328569
84	CT080	ltuB	hypothetical protein	-0.14318	1.90124	NP_219583.1	3328475
53	CT049	-	hypothetical protein	-0.15097	1.88878	NP_219552.1	3328441
598	CT583	gp6D	CHLTR Plasmid Paralog	-0.1971	1.81493	NP_220098.1	3329026
353	CT345	-	hypothetical protein	-0.20041	1.80964	NP_219852.1	3328765
151	CT147	-	hypothetical protein	-0.20771	1.79795	NP_219650.1	3328548
829	CT809	-	hypothetical protein	-0.21218	1.7908	NP_220329.1	3329276
462	CT449	-	hypothetical protein	-0.21746	1.78234	NP_219962.1	3328882
393	CT384	-	hypothetical protein	-0.22157	1.77576	NP_219894.1	3328809
690	CT671	-	hypothetical protein	-0.229	1.76387		3329122
93	CT089	lcrE	Low Calcium Response E	-0.2365	1.75187		3328485
691	CT672	fliN	Flagellar Motor Switch Domain/YscQ family	-0.24291	1.7416	NP_220191.1	3329123
352	CT344	lon	Lon ATP-dependent protease	-0.25459	1.72291	NP_219851.1	3328764
640	CT623	-	CHLPN 76kDa Homolog	-0.27316	1.69318	NP_220140.1	6578109
474	CT461	yaeI	phosphohydrolase	-0.27406	1.69174	NP_219974.1	3328895
452	CT440	-	hypothetical protein	-0.2819	1.67919	NP_219952.1	3328871
169	CT165	-	hypothetical protein	-0.29034	1.66568	NP_219668.1	3328568
892	CT870	pmpF	Putative Outer Membrane Protein F	-0.30308	1.64529	NP_220392.1	3329345
317	CT311	-	hypothetical protein	-0.31065	1.63317	NP_219816.1	3328727
14	CT011	-	hypothetical protein	-0.31537	1.62562		3328400
885	CT863	-	hypothetical protein	-0.33652	1.59176		3329337
64	CT060	flhA	Flagellar Secretion Protein	-0.33894	1.58789	NP_219563.1	3328453
201	CT196	-	hypothetical protein	-0.36342	1.5487	NP_219700.1	3328602
544	CT529	-	hypothetical protein	-0.37382	1.53205		3328967
159	CT155	-	Phospholipase D Endonuclease Superfamily	-0.37519	1.52986	NP_219658.1	3328557
824	CT794.1	-	hypothetical protein	-0.39381	1.50006	NP_220314.1	3522910
237	CT232	incB	Inclusion Membrane Protein B	-0.42784	1.44558	NP_219737.1	3328641
219	CT214	-	hypothetical protein	-0.43309	1.43718	NP_219718.1	3328622
210	CT205	pfkA_1	Fructose-6-P Phosphotransferase	-0.4339	1.43588	NP_219709.1	3328612
659	CT642	-	hypothetical protein	-0.43809	1.42918		3329090
152	CT148	mhpA	Monooxygenase	-0.44954	1.41085	NP_219651.1	3328549
10	CT007	-	hypothetical protein	-0.45059	1.40917	NP_219509.1	3328395
105	CT101	-	hypothetical protein	-0.45329	1.40484	NP_219604.1	3328498
228	CT223	-	hypothetical protein	-0.45609	1.40036	NP_219728.1	3328632
567	CT552	-	hypothetical protein	-0.45698	1.39894	NP_220067.1	3328992
294	CT288	-	hypothetical protein	-0.46899	1.37971	NP_219793.1	3328702
122	CT118	-	hypothetical protein	-0.47044	1.37739	NP_219621.1	3328517
715	CT696	-	hypothetical protein	-0.47144	1.37579	NP_220215.1	6578111
687	CT668	-	hypothetical protein	-0.47387	1.3719	NP_220187.1	3329119
268	CT262	-	hypothetical protein	-0.47447	1.37094	NP_219767.1	3328674
146	CT142	-	hypothetical protein	-0.47966	1.36263	NP_219645.1	3328542
747	CT728	-	hypothetical protein	-0.47977	1.36246	NP_220247.1	3329185
574	CT559	yscJ	Yop proteins translocation lipoprotein J	-0.48816	1.34903	NP_220074.1	3329000
315	CT309	-	hypothetical protein	-0.48845	1.34856	NP_219814.1	3328725
683	CT664	-	adenylate cyclase-like protein	-0.49005	1.346	NP_220183.1	3329115
203	CT198	oppA_3	Oligopeptide Binding Protein	-0.49973	1.33051	NP_219702.1	3328604
894	CT872	pmpH	Putative Outer Membrane Protein H	-0.50118	1.32819	NP_220394.1	3329347
279	CT273	-	hypothetical protein	-0.50162	1.32748	NP_219778.1	3328686
774	-	groEL_3	HSP60	-0.50174	1.32729	NP_220274.1	3329217
874	CT853	-	hypothetical protein	-0.50614	1.32025	NP_220375.1	3329326
9	CT006	-	hypothetical protein	-0.50908	1.31554	NP_219508.1	3328394
401	CT391	-	hypothetical protein	-0.51334	1.30872	NP_219901.1	3328817
178	CT174	-	hypothetical protein	-0.5167	1.30334	NP_219678.1	3328578
392	CT383	-	hypothetical protein	-0.52593	1.28857	NP_219893.1	3328808
87	CT083	CT083	hypothetical protein	-0.52677	1.28722		3328478
763	CT744	-	CHLTR possible phosphoprotein	-0.5318	1.27917	NP_220263.1	3329204
577	CT562	yscR	Yop proteins translocation protein R	-0.53723	1.27048	NP_220077.1	3329003
657	CT640	recC	Exodeoxyribonuclease V, Gamma	-0.53952	1.26681	NP_220158.1	3329088
310	CT304	atpK	ATP Synthase Subunit K	-0.5433	1.26076	NP_219809.1	6578102
62	CT058	-	hypothetical protein	-0.5471	1.25468	NP_219561.1	3328451
443	CT421.1	-	hypothetical protein	-0.55197	1.24689	NP_219932.1	3522895
752	CT733	-	hypothetical protein	-0.55369	1.24413	NP_220252.1	3329191
594	CT579	CT579	hypothetical protein	-0.56632	1.22391		3329021
675	CT656	-	hypothetical protein	-0.56911	1.21945	NP_220175.1	3329106
653	CT636	greA	Transcription Elongation Factor G	-0.57924	1.20323	NP_220153.1	3329084
380	CT371	-	hypothetical protein	-0.58803	1.18916	NP_219880.1	3328795
397	CT387	-	hypothetical protein	-0.59011	1.18583	NP_219897.1	3328813
799	CT780	-	Thioredoxin Disulfide Isomerase	-0.59232	1.1823	NP_220299.1	3329244
866	CT845	-	hypothetical protein	-0.59426	1.17919	NP_220366.1	3329317
217	CT212	-	hypothetical protein	-0.59637	1.17581	NP_219716.1	3328620
635	CT618	-	hypothetical protein	-0.59701	1.17479	NP_220135.1	3329064
765	CT746	hemN_2	Coproporphyrinogen III Oxidase	-0.60727	1.15837	NP_220265.1	3329206
420	CT410	pcnB_1	PolyA Polymerase	-0.61063	1.15299	NP_219920.1	3328838
126	CT122	efp_1	Elongation Factor P	-0.61348	1.14842	NP_219625.1	3328521
51	CT047	-	hypothetical protein	-0.61948	1.13882	NP_219550.1	3328439
291	CT285	lplA_1	Lipoate Protein Ligase	-0.62033	1.13746	NP_219790.1	3328699
389	CT380	phnP	predicted metal dependent hydrolase (histidinic triad)	-0.62244	1.13408	NP_219889.1	3328805
591	CT576	lcrH_1	Low Calcium Response Protein H	-0.62354	1.13232		3329018
197	CT192	-	hypothetical protein	-0.62593	1.1285	NP_219696.1	3328598
588	CT573	-	hypothetical protein	-0.62601	1.12837	NP_220088.1	3329014
808	CT789	-	hypothetical protein	-0.62735	1.12622	NP_220308.1	3329254
692	CT673	pkn5	S/T Protein Kinase	-0.6295	1.12278		3329124
404	CT394	hrcA	HTH Transcriptional Repressor	-0.6307	1.12086	NP_219904.1	3328820
825	CT805	-	hypothetical protein	-0.63498	1.11401	NP_220325.1	3329272
553	CT538	-	hypothetical protein	-0.63578	1.11273	NP_220053.1	3328976
184	CT180	tauB	ABC Transport ATPase (Nitrate/Fe)	-0.64105	1.10429	NP_219684.1	3328584
833	CT813	-	hypothetical protein	-0.64203	1.10272	NP_220333.1	3329281
632	CT606.1	CT606.1	hypothetical protein	-0.64597	1.09642		3522903
732	CT713	porB	Outer Membrane Protein Analog	-0.66075	1.07276	NP_220232.1	3329169
171	CT167	-	hypothetical protein	-0.66584	1.06461	NP_219670.1	3328570
753	CT734	-	hypothetical protein	-0.6659	1.06451	NP_220253.1	3329192
306	CT300	-	hypothetical protein	-0.66886	1.05978	NP_219805.1	3328715
651	CT634	-	NADH-ubiquinone oxidoreductase, alpha chain	-0.66899	1.05957	NP_220151.1	3329082
568	CT553	fmu	RNA Methyltransferase	-0.6756	1.04899	NP_220068.1	3328993
798	CT779	-	hypothetical protein	-0.67748	1.04598	NP_220298.1	3329243
466	CT453	plsC	Glycerol-3-P Acyltransferase	-0.67843	1.04446	NP_219966.1	3328886
638	CT621	-	hypothetical protein	-0.68532	1.03343	NP_220138.1	3329067
230	CT225	-	hypothetical protein	-0.68698	1.03077	NP_219730.1	3328634
423	CT413	pmpB	Putative outer membrane protein B	-0.70125	1.00793	NP_219923.1	3328841
820	CT801	rs6	S6 Ribosomal Protein	-0.7014	1.00769	NP_220321.1	3329267
656	CT639	recB	Exodeoxyribonuclease V, Beta	-0.71454	0.986656	NP_220157.1	3329087
200	CT195	-	hypothetical protein	-0.7149	0.98608	NP_219699.1	3328601
726	CT707	tig	Trigger Factor-peptidyl prolyl isomerase	-0.7174	0.982078	NP_220226.1	3329162
381	CT372	-	hypothetical protein	-0.71981	0.97822	NP_219881.1	3328796
66	CT062	tyrS	tyrosyl tRNA Synthetase	-0.73022	0.961556	NP_219565.1	3328456
493	CT480	oppA_4	oligopeptide Binding Lipoprotein	-0.73055	0.961028	NP_219993.1	3328915
131	CT127	ydhO	predicted polysaccharide hydrolase-invasin repeat family	-0.73512	0.953713	NP_219630.1	3328526
432	CT422	-	possible metalloenzyme	-0.73625	0.951904	NP_219934.1	3328852
741	CT722	pgm	Phosphoglycerate Mutase	-0.73823	0.948735	NP_220241.1	3329179
427	CT417	-	Metal Transport Protein	-0.74009	0.945757	NP_219927.1	3328846
69	CT065	-	ADP/ATP Translocase	-0.74024	0.945517	NP_219568.1	3328459
199	CT194	mgtE	Mg++ Transporter (CBS Domain)	-0.74034	0.945357	NP_219698.1	3328600
575	CT560	-	hypothetical protein	-0.74242	0.942028	NP_220075.1	3329001
395	CT386	-	predicted metal dependent hydrolase	-0.74704	0.934632	NP_219896.1	6578103
337	CT326.2	-	hypothetical protein	-0.75611	0.920114	NP_219833.1	3522893
208	CT203	-	hypothetical protein	-0.75881	0.915792	NP_219707.1	6578100
330	CT324	-	hypothetical protein	-0.75881	0.915792	NP_219829.1	3328742
579	CT564	yscT	Yop proteins translocation protein T	-0.75918	0.9152	NP_220079.1	3329005
147	CT143	-	hypothetical protein	-0.76039	0.913263	NP_219646.1	3328543
768	CT749	alaS	Alanyl tRNA Synthetase	-0.76816	0.900825	NP_220268.1	6578113
648	CT631	-	hypothetical protein	-0.76912	0.899288	NP_220148.1	3329079
139	CT135	-	hypothetical protein	-0.76913	0.899272	NP_219638.1	3328535
255	CT249	-	hypothetical protein	-0.77413	0.891269	NP_219754.1	3328660
746	CT727	zntA	Metal Transport P-type ATPase	-0.77438	0.890869	NP_220246.1	3329184
2	CT874	pmpI	Putative Outer Membrane Protein I	-0.77555	0.888996	NP_220396.1	3329350
445	CT433	-	hypothetical protein	-0.77837	0.884482	NP_219945.1	3328864
116	CT112	pepF	Oligoendopeptidase	-0.77975	0.882273	NP_219615.1	3328510
8	CT005	-	hypothetical protein	-0.78159	0.879327	NP_219507.1	3328393
785	CT766	miaA	tRNA isopentenylpyrophosphate transferase	-0.78859	0.868122	NP_220285.1	3329229
338	CT330	-	hypothetical protein	-0.79278	0.861415	NP_219837.1	3328749
19	CT016	-	hypothetical protein	-0.79835	0.852499	NP_219518.1	3328405
518	CT504	-	hypothetical protein	-0.80089	0.848433	NP_220019.1	3328941
177	CT173	-	hypothetical protein	-0.80097	0.848305	NP_219677.1	3328577
357	CT349	maf	Maf-type protein	-0.8031	0.844896	NP_219856.1	3328770
729	CT710	pckA	Phosphoenolpyruvate Carboxykinase	-0.80376	0.843839	NP_220229.1	3329165
20	CT017	-	hypothetical protein	-0.8103	0.833371	NP_219519.1	3328406
611	CT596	exbB	polysaccharide transporter	-0.81653	0.823398	NP_220112.1	3329040
251	CT245	pdhA	Pyruvate Dehydrogenase Alpha	-0.81661	0.82327	NP_219750.1	3328655
832	CT812	pmpD	Putative Outer Membrane Protein D	-0.8224	0.814002	NP_220332.1	3329279
880	CT858	-	predicted Protease containing IRBP and DHR domains	-0.82628	0.807791	NP_220380.1	6578118
437	CT427	-	hypothetical protein	-0.83048	0.801068	NP_219939.1	3328857
316	CT310	atpE	ATP Synthase Subunit E	-0.83088	0.800428	NP_219815.1	3328726
834	CT814	-	hypothetical protein	-0.83107	0.800124	NP_220334.1	3329282
375	CT366	aroA	Phosphoshikimate 1-carboxyl vinyltransferase	-0.83118	0.799947	NP_219875.1	3328790
778	CT759	nlpD	Muramidase (invasin repeat family)	-0.83167	0.799163	NP_220278.1	3329221
855	CT834	rl35	L35 Ribosomal Protein	-0.83205	0.798555	NP_220355.1	3329305
505	CT492	yacE	predicted phosphatase/kinase	-0.84314	0.780803	NP_220006.1	3328928
473	CT460	-	SWIB (YM74) complex protein	-0.8432	0.780707	NP_219973.1	3328894
106	CT102	-	hypothetical protein	-0.84343	0.780339	NP_219605.1	3328499
891	CT869	pmpE	Putative Outer Membrane Protein E	-0.84521	0.777489	NP_220391.1	3329344
482	CT469	-	hypothetical protein	-0.84692	0.774752	NP_219982.1	3328903
722	CT703	yphC	GTPase/GTP-binding protein	-0.84721	0.774288	NP_220222.1	3329158
573	CT558	lipA	Lipoate Synthetase	-0.84725	0.774224	NP_220073.1	3328998
327	CT321	secE	Preprotein translocase subunit	-0.84901	0.771407	NP_219826.1	3328739
73	CT069	ytgC	Integral Membrane Protein	-0.86199	0.750629	NP_219572.1	3328463
495	CT482	-	hypothetical protein	-0.86319	0.748708	NP_219996.1	3328918
580	CT565	-	hypothetical protein	-0.86435	0.746851	NP_220080.1	3329006
382	CT373	CT373	hypothetical protein	-0.86505	0.745731		3328797
674	CT655	kdsA	KDO Synthetase	-0.86814	0.740785	NP_220174.1	3329105
21	CT018	-	hypothetical protein	-0.86854	0.740144	NP_219520.1	3328407
85	CT081	-	CHLTR T2 Protein	-0.87308	0.732877	NP_219584.1	3328476
565	CT550	CT550	hypothetical protein	-0.8743	0.730924		3328989
45	CT042	glgX	Glycogen Hydrolase (debranching)	-0.8751	0.729644	NP_219545.1	3328433
671	CT652.1	CT652.1	hypothetical protein	-0.87765	0.725562		3522906
685	CT666	-	hypothetical protein	-0.87998	0.721832	NP_220185.1	3329117
435	CT425	-	hypothetical protein	-0.88105	0.720119	NP_219937.1	3328855
157	CT153	-	hypothetical protein	-0.88309	0.716854	NP_219656.1	3328555
148	CT144	-	hypothetical protein	-0.88761	0.709619	NP_219647.1	3328544
508	CT480.1	-	hypothetical protein	-0.88859	0.70805		3522900
787	CT768	-	hypothetical protein	-0.88959	0.706449	NP_220287.1	3329231
123	CT119	incA	Inclusion Membrane Protein A	-0.8904	0.705153	NP_219622.1	3328518
662	CT644	yohI	predicted oxidoreductase	-0.89517	0.697517		3329093
883	CT861	CT861	hypothetical protein	-0.89546	0.697053		3329335
893	CT871	pmpG	Putative Outer Membrane Protein G	-0.89876	0.691771	NP_220393.1	3329346
430	CT420	rl21	L21 Ribosomal Protein	-0.90282	0.685272	NP_219930.1	3328849
719	CT700	-	hypothetical protein	-0.90584	0.680437	NP_220219.1	3329154
39	CT036	-	hypothetical protein	-0.91061	0.672802	NP_219538.1	3328427
694	CT675	karG	Arginine Kinase	-0.91292	0.669104	NP_220194.1	3329127
340	CT332	pykF	Pyruvate Kinase	-0.91934	0.658828	NP_219839.1	3328751
813	CT794	dnaG	DNA Primase	-0.9205	0.656971	NP_220313.1	3329259
405	CT395	grpE	HSP-70 Cofactor	-0.92262	0.653577	NP_219905.1	3328821
618	CT602	-	hypothetical protein	-0.92655	0.647287	NP_220118.1	3329047
346	CT338	-	hypothetical protein	-0.92855	0.644085	NP_219845.1	3328758
590	CT575	mutL	DNA Mismatch Repair	-0.92881	0.643669	NP_220090.1	3329017
434	CT424	rsbV_1	Sigma Regulatory Factor	-0.93258	0.637634	NP_219936.1	3328854
79	CT075	dnaN	DNA Pol III (beta chain)	-0.94031	0.625261	NP_219578.1	3328470
802	CT783	-	predicted disulfide bond isomerase	-0.94154	0.623292	NP_220302.1	3329248
408	CT398	-	hypothetical protein	-0.94229	0.622091	NP_219908.1	3328825
700	CT681	ompA	Major Outer Membrane Protein	-0.94242	0.621883	NP_220200.1	3329133
118	CT114	-	hypothetical protein	-0.94595	0.616232	NP_219617.1	3328512
196	CT191	-	hypothetical protein	-0.94814	0.612727	NP_219695.1	3328596
478	CT465	-	hypothetical protein	-0.94881	0.611654		3328899
296	CT290	ptsN_1	PTS IIA Protein + HTH DNA-Binding Domain	-0.95359	0.604003	NP_219795.1	3328704
549	CT534	cutE	Apolipoprotein N-Acetyltransferase	-0.95658	0.599217	NP_220049.1	3328972
454	CT442	crpA	15kDa Cysteine-Rich Protein	-0.957	0.598545	NP_219954.1	3328873
95	CT091	yscU	Yop proteins translocation protein U	-0.95901	0.595327	NP_219594.1	3328487
259	CT253	-	hypothetical protein	-0.95983	0.594014	NP_219758.1	3328664
664	CT646	-	hypothetical protein	-0.96173	0.590973	NP_220164.1	3329095
227	CT222	-	CHLTR hypothetical protein	-0.96212	0.590349	NP_219727.1	3328631
677	CT658	sfhB	Pseudouridine Synthase	-0.96559	0.584794	NP_220177.1	3329108
693	CT674	yscC	probable Yop proteins translocation protein C/general secretion pathway protein	-0.96581	0.584442	NP_220193.1	3329125
119	CT115	-	hypothetical protein	-0.96837	0.580344	NP_219618.1	3328513
669	CT651	-	hypothetical protein	-0.96937	0.578744	NP_220169.1	3329100
81	CT077	yojL	hypothetical protein	-0.96967	0.578263	NP_219580.1	3328472
179	CT175	oppA_2	Oligopeptide binding protein permease	-0.9713	0.575654	NP_219679.1	3328579
603	CT588	rbsU	sigma regulatory family protein-PP2C phosphatase (RsbW antagonist)	-0.9717	0.575014	NP_220103.1	3329031
608	CT593	sdhC	Succinate Dehydrogenase	-0.97546	0.568995	NP_220108.1	3329037
378	CT369	aroB	Dehyroquinate Synthase	-0.97575	0.568531	NP_219878.1	3328793
485	CT472	-	hypothetical protein	-0.97633	0.567603	NP_219985.1	3328907
11	CT008	rnhB_1	Ribonuclease HII	-0.98124	0.559743	NP_219510.1	3328396
458	CT446	euo	CHLPS Euo Protein	-0.98272	0.557374	NP_219959.1	3328878
845	CT824	-	Zinc Metalloprotease (insulinase family)	-0.98606	0.552027	NP_220345.1	3329294
467	CT454	argS	Arginyl tRNA Transferase	-0.98674	0.550939	NP_219967.1	3328887
120	CT116	-	hypothetical protein	-0.99056	0.544824	NP_219619.1	3328514
626	CT610	CT610	hypothetical protein	-0.99075	0.54452		3329055
38	CT035	-	Biotin Protein Ligase	-0.99088	0.544312	NP_219537.1	3328426
424	CT414	pmpC	Putative outer membrane protein C	-0.99103	0.544072	NP_219924.1	3328843
570	CT555	-	SWI/SNF family helicase	-0.99329	0.540454	NP_220070.1	3328995
563	CT548	-	hypothetical protein	-0.99498	0.537749	NP_220063.1	3328987
191	CT186	devB	Glucose-6-P Dehyrogenase (DevB family)	-1.00106	0.528017	NP_219690.1	3328591
74	CT070	ytgD	Integral Membrane Protein	-1.00487	0.521918	NP_219573.1	3328464
859	CT838	-	hypothetical protein	-1.00966	0.51425	NP_220359.1	3329309
113	CT109	-	CHLPS hypothetical protein	-1.01071	0.51257	NP_219612.1	3328506
49	CT045	pepA	Leucyl Aminopeptidase A	-1.01108	0.511977	NP_219548.1	3328437
581	CT566	CT566	hypothetical protein	-1.01143	0.511417		3329007
627	CT611	-	hypothetical protein	-1.01164	0.511081	NP_220128.1	3329056
307	CT301	pknD	S/T Protein Kinase	-1.01553	0.504854	NP_219806.1	3328716
417	CT407	dksA	DnaK Suppressor	-1.01865	0.49986	NP_219917.1	3328835
190	CT185	zwf	Glucose-6-P Dehyrogenase	-1.01943	0.498611	NP_219689.1	3328590
483	CT470	-	hypothetical protein	-1.01976	0.498083	NP_219983.1	3328904
869	CT848	CT848	hypothetical protein	-1.02065	0.496658		3329320
4	CT001	-	hypothetical protein	-1.02158	0.49517	NP_219503.1	3328389
764	CT745	hemG	protoporphyrinogen Oxidase	-1.022	0.494498	NP_220264.1	3329205
28	CT025	ffh	Signal Recognition Particle GTPase	-1.02298	0.492929	NP_219527.1	3328415
613	CT598	-	hypothetical protein	-1.02712	0.486302	NP_220114.1	3329042
652	CT635	-	hypothetical protein	-1.02857	0.483981	NP_220152.1	3329083
851	CT830	ytgB_2	putative rRNA methylase	-1.03295	0.47697	NP_220351.1	3329301
33	CT030	gmk	GMP Kinase	-1.03427	0.474857	NP_219532.1	3328420
347	CT339	-	hypothetical protein	-1.03504	0.473624	NP_219846.1	3328759
615	CT600	pal	Peptidoglycan-Associated Lipoprotein	-1.03917	0.467013	NP_220116.1	3329044
368	CT359	-	hypothetical protein	-1.03944	0.466581	NP_219868.1	3328782
221	CT216	xasA	Amino Acid Transporter	-1.04596	0.456144	NP_219720.1	3328624
297	CT291	ptsN_2	PTS IIA Protein	-1.05051	0.448861	NP_219796.1	3328705
418	CT408	lspA	Lipoprotein Signal Peptidase	-1.05167	0.447004	NP_219918.1	3328836
189	CT184	yqgF	YqgF Family	-1.05244	0.445771	NP_219688.1	3328589
29	CT026	rs16	S16 Ribosomal Protein	-1.06222	0.430116		3328416
236	CT231	-	Sodium-dependent amino acid transporter	-1.06403	0.427219	NP_219736.1	3328640
455	CT443	omcB	60kDa Cysteine-Rich OMP	-1.0641	0.427107	NP_219955.1	3328874
689	CT670	-	hypothetical protein	-1.06492	0.425794	NP_220189.1	3329121
300	CT294	sodM	Superoxide Dismutase (Mn)	-1.07343	0.412172	NP_219799.1	3328709
541	CT527	rl4	L4 Ribosomal Protein	-1.07449	0.410476	NP_220042.1	3328964
758	CT739	ftsK	Cell Division Protein FtsK	-1.07735	0.405897	NP_220258.1	3329197
260	CT254	-	hypothetical protein	-1.0801	0.401495	NP_219759.1	3328665
444	CT421.2	-	hypothetical protein	-1.08306	0.396757	NP_219933.1	3522896
266	CT260	-	hypothetical protein	-1.08385	0.395493	NP_219765.1	3328672
564	CT549	rsbW	sigma regulatory factor-histidine kinase	-1.08725	0.39005	NP_220064.1	3328988
761	CT742	ygcA	rRNA Methyltransferse	-1.08922	0.386897	NP_220261.1	6578112
716	CT697	nth	Endonuclease III	-1.08966	0.386193	NP_220216.1	3329151
211	CT206	-	predicted acyltransferase family protein	-1.08982	0.385936	NP_219710.1	3328613
89	CT085	-	hypothetical protein	-1.09207	0.382335	NP_219588.1	3328481
739	CT720	-	NifU-related protein	-1.09289	0.381022	NP_220239.1	3329177
487	CT474	-	hypothetical protein	-1.09562	0.376652	NP_219987.1	6578106
665	CT647	-	hypothetical protein	-1.0966	0.375084	NP_220165.1	3329096
569	CT554	brnQ	Amino Acid (Branched) Transport	-1.10087	0.368248	NP_220069.1	3328994
830	CT810	rl32	L32 Ribosomal Protein	-1.10184	0.366696	NP_220330.1	3329277
371	CT362	lysC	Aspartokinase III	-1.10649	0.359252	NP_219871.1	3328785
684	CT665	-	hypothetical protein	-1.10851	0.356019	NP_220184.1	3329116
663	CT645	-	hypothetical protein	-1.11092	0.352161	NP_220163.1	3329094
489	CT476	-	hypothetical protein	-1.1192	0.338907	NP_219989.1	3328911
479	CT466	-	hypothetical protein	-1.11997	0.337675	NP_219979.1	3328900
783	CT764	-	hypothetical protein	-1.12018	0.337339	NP_220283.1	3329227
225	CT220	ubiX	Phenylacrylate Decarboxylase	-1.12213	0.334217	NP_219724.1	3328628
773	CT754	icc	phosphohydrolase	-1.12903	0.323172	NP_220273.1	3329215
543	CT496.1	-	hypothetical protein	-1.12904	0.323156	NP_220011.1	3522901
183	CT179	-	hypothetical protein	-1.1415	0.303211	NP_219683.1	3328583
616	CT601	papQ	Invasin repeat family phosphatase	-1.14971	0.290069	NP_220117.1	3329045
823	CT804	ychB	Predicted Kinase	-1.15191	0.286548	NP_220324.1	3329270
881	CT859	lytB	Metalloprotease	-1.15503	0.281553	NP_220381.1	3329333
767	CT748	mfd	Transcription-Repair Coupling	-1.15623	0.279632	NP_220267.1	3329208
136	CT132	-	hypothetical protein	-1.1567	0.27888	NP_219635.1	3328531
629	CT613	folP	Dihydropteroate Synthase	-1.15752	0.277568	NP_220130.1	3329058
231	CT226	-	hypothetical protein	-1.15828	0.276351	NP_219731.1	3328635
283	CT277	-	hypothetical protein	-1.16038	0.272989	NP_219782.1	3328690
513	CT499	lplA_2	Lipoate Protein Ligase	-1.16369	0.267691	NP_220014.1	3328936
247	CT241	yaeT	Omp85 Analog	-1.1645	0.266394	NP_219746.1	3328651
110	CT106	yceC	predicted pseudouridine synthetase family	-1.16623	0.263625	NP_219609.1	3328503
571	CT556	-	hypothetical protein	-1.16669	0.262889	NP_220071.1	3328996
875	CT854	-	ABC transporter permease fused to pyrimidine biosynthesis enzyme	-1.1685	0.259992	NP_220376.1	3329327
5	CT002	gatC	Glu-tRNA Gln Amidotransferase (C subunit)	-1.16958	0.258263	NP_219504.1	3328390
313	CT307	atpB	ATP Synthase Subunit B	-1.17048	0.256822	NP_219812.1	3328723
232	CT227	-	hypothetical protein	-1.17429	0.250723	NP_219732.1	3328636
379	CT370	aroE	Shikimate 5-Dehyrogenase	-1.17594	0.248082	NP_219879.1	3328794
7	CT004	gatB	Glu-tRNA Gln Amidotransferase B Subunit	-1.18026	0.241167	NP_219506.1	3328392
465	CT452	cmk	CMP Kinase	-1.1815	0.239182	NP_219965.1	3328885
681	CT662	hemA	Glutamyl tRNA Reductase	-1.18189	0.238558	NP_220181.1	6578110
660	CT638.1	-	hypothetical protein-possible frameshift with CT638	-1.18206	0.238286	NP_220156.1	3522904
280	CT274	-	hypothetical protein	-1.18266	0.237325	NP_219779.1	3328687
517	CT503	-	hypothetical protein	-1.18454	0.234316	NP_220018.1	3328940
770	CT751	amn	AMP Nucleosidase	-1.1846	0.23422	NP_220270.1	3329212
295	CT289	-	hypothetical protein	-1.18608	0.231851	NP_219794.1	3328703
58	CT054	sucA	Oxoglutarate Dehydrogenase	-1.18629	0.231515	NP_219557.1	3328447
552	CT537	yjeE	ATPase or Kinase	-1.18734	0.229834	NP_220052.1	3328975
734	CT715	-	AgX-1 Homolog-UDP-Glucose Pyrophosphorylase	-1.19172	0.222823	NP_220234.1	3329171
50	CT046	hctB	Histone-like Protein 2	-1.19188	0.222567	NP_219549.1	3328438
351	CT343	-	O-Sialoglycoprotein Endopeptidase family	-1.19269	0.22127	NP_219850.1	3328763
658	CT641	ygeD	predicted Efflux Protein	-1.1932	0.220454	NP_220159.1	3329089
100	CT096	infB	Initiation Factor-2	-1.19601	0.215956	NP_219599.1	3328492
818	CT799	ctc	General Stress Protein	-1.19842	0.212098	NP_220319.1	3329265
676	CT657	-	hypothetical protein	-1.19884	0.211426	NP_220176.1	3329107
311	CT305	atpI	ATP Synthase Subunit I	-1.20078	0.20832	NP_219810.1	3328721
484	CT471	-	hypothetical protein	-1.20737	0.197771	NP_219984.1	3328905
622	CT606	yggV	hypothetical protein	-1.20852	0.195931	NP_220122.1	3329051
77	CT073	-	predicted OMP l	-1.21346	0.188023	NP_219576.1	3328468
425	CT415	yebL	Solute-binding protein	-1.2171	0.182196	NP_219925.1	3328844
703	CT684	-	ABC Transporter	-1.21897	0.179203	NP_220203.1	3329137
180	CT176	dsbB	Disulfide bond Oxidoreductase	-1.22026	0.177138	NP_219680.1	3328580
605	CT590	-	hypothetical protein	-1.22151	0.175137	NP_220105.1	3329033
267	CT261	dnaQ_1	DNA Pol III Epsilon Chain	-1.22277	0.17312	NP_219766.1	3328673
366	CT357	-	hypothetical protein	-1.22432	0.170639	NP_219866.1	3328780
673	CT654	-	hypothetical protein	-1.22449	0.170367	NP_220173.1	3329104
666	CT648	-	hypothetical protein	-1.22542	0.168878	NP_220166.1	3329097
840	CT819	yccA	Transport Permease	-1.22807	0.164637	NP_220340.1	3329288
790	CT771	-	hydrolase/phosphatase homolog	-1.22809	0.164604	NP_220290.1	3329234
805	CT786	rl36	L36 Ribosomal Protein	-1.22962	0.162155	NP_220305.1	3329251
853	CT832	nusB	Transcription termination factor	-1.22994	0.161643	NP_220353.1	3329303
610	CT595	dsbD	Thio:disulfide Interchange Protein	-1.23006	0.161451	NP_220111.1	3329039
275	CT269	murE	UDP-N-acetylmuramoylalanylglutamyl DAP Ligase	-1.23159	0.159002	NP_219774.1	3328681
160	CT156	-	hypothetical protein	-1.23303	0.156697	NP_219659.1	3328558
37	CT034	ytfF	Cationic Amino Acid Transporter	-1.23334	0.156201		3328425
274	CT268	amiA	N-Acetylmuramoyl Alanine Amidase	-1.23339	0.156121	NP_219773.1	3328680
399	CT389	-	hypothetical protein	-1.23591	0.152087	NP_219899.1	3328815
490	CT477	ada	Methylated-DNA protein - cysteine methyltransferase	-1.23622	0.151591	NP_219990.1	3328912
500	CT487	yhhF	Methylase	-1.24222	0.141986	NP_220001.1	3328923
35	CT032	metG	Methionyl-tRNA Synthetase	-1.24335	0.140177	NP_219534.1	3328422
711	CT692	-	Phosphate Permease	-1.24431	0.138641	NP_220211.1	3329145
205	CT200	oppC_1	Oligopeptide Permease	-1.24521	0.1372	NP_219704.1	3328606
285	CT279	nqr3	NADH (Ubiquinone) Oxidoreductase, Gamma	-1.24865	0.131694	NP_219784.1	3328692
47	CT043	-	hypothetical protein	-1.25131	0.127436	NP_219546.1	3328435
731	CT712	CT712	hypothetical protein	-1.25502	0.121497		3329168
562	CT547	-	hypothetical protein	-1.25542	0.120857	NP_220062.1	3328986
149	CT145	-	Serine/threonine Protein Kinase	-1.26204	0.11026	NP_219648.1	3328546
431	CT421	CT421	hypothetical protein	-1.26259	0.10938	NP_219931.1	3328851
414	CT404	-	SAM dependent methyltransferase	-1.26305	0.108643	NP_219914.1	3328831
810	CT791	uvrC	Excinuclease ABC, Subunit C	-1.26396	0.107187	NP_220310.1	3329256
584	CT569	-	predicted OMP	-1.26419	0.106818	NP_220084.1	3329010
141	CT137	ywlC	SuA5 Superfamily-related Protein	-1.26474	0.105938	NP_219640.1	3328537
793	CT774	cysQ	Sulfite Synthesis/biphosphate phosphatase	-1.26552	0.104689	NP_220293.1	3329237
83	CT079	-	hypothetical protein	-1.26599	0.103937	NP_219582.1	3328474
456	CT444	omcA	9kDa-Cysteine-Rich Lipoprotein	-1.26669	0.102817	NP_219956.1	3328876
172	CT168	-	hypothetical protein	-1.26671	0.102785	NP_219671.1	3328571
213	CT208	gseA	KDO Transferase	-1.26813	0.100512	NP_219712.1	3328615
468	CT455	murA	UDP-N-Acetylglucosamine Transferase	-1.26965	0.0980784	NP_219968.1	3328888
749	CT730	ribD	Riboflavin Deaminase	-1.2712	0.0955973	NP_220249.1	3329187
705	CT686	-	ABC Transporter Membrane Protein	-1.27251	0.0935004	NP_220205.1	3329139
354	CT346	elaC	Sulphohydrolase/Glycosulfatase	-1.27266	0.0932603	NP_219853.1	3328767
155	CT151	-	hypothetical protein	-1.27316	0.0924599	NP_219654.1	3328553
743	CT724	-	hypothetical protein	-1.27406	0.0910193	NP_220243.1	3329181
735	CT716	-	hypothetical protein	-1.27688	0.0865052	NP_220235.1	3329172
720	CT701	secA_2	Protein Translocase	-1.27727	0.0858809	NP_220220.1	3329155
345	CT337	ptsH	PTS Phosphocarrier Protein Hpr	-1.28028	0.0810628	NP_219844.1	3328756
815	CT796	glyQ	Glycyl tRNA Synthetase	-1.28029	0.0810467	NP_220316.1	3329262
111	CT107	mutY	A/G-specific Adenine Glycosylase	-1.28032	0.0809987	NP_219610.1	3328504
212	CT207	pfkA_2	Fructose-6-P Phosphotransferase	-1.28153	0.0790619	NP_219711.1	3328614
446	CT434	ygbB	YgbB family	-1.28346	0.0759725	NP_219946.1	3328865
138	CT134	-	hypothetical protein	-1.28695	0.0703859	NP_219637.1	3328534
143	CT139	oppA_1	Oligopeptide Binding Protein	-1.28786	0.0689293	NP_219642.1	3328539
137	CT133	-	predicted rRNA methylase	-1.28879	0.0674406	NP_219636.1	3328533
698	CT679	tsf	Elongation Factor TS	-1.28888	0.0672965	NP_220198.1	3329131
277	CT271	-	hypothetical protein	-1.29096	0.063967	NP_219776.1	3328684
736	CT717	fliI	Flagellum-specific ATP Synthase	-1.292	0.0623023	NP_220236.1	3329173
55	CT051	-	hypothetical protein	-1.29224	0.0619181	NP_219554.1	3328443
224	CT219	ubiA	4-hydroxybenzoate octaphenyltransferase	-1.29384	0.059357	NP_219723.1	3328627
558	CT543	hisS	Histidyl tRNA Synthetase	-1.29594	0.0559954	NP_220058.1	3328982
804	CT785	rl34	L34 Ribosomal Protein	-1.2967	0.0547789	NP_220304.1	3329250
412	CT402	lpxK	probable tetraacyldisaccharide 4' kinase	-1.29811	0.0525219	NP_219912.1	3328829
521	CT507	rpoA	RNA Polymerase Alpha	-1.29918	0.0508091	NP_220022.1	3328944
860	CT839	-	hypothetical protein	-1.29998	0.0495285	NP_220360.1	3329310
620	CT604	groEL_2	HSP-60	-1.30609	0.0397481	NP_220120.1	3329049
576	CT561	yscL	Yop proteins translocation protein L	-1.30611	0.0397161	NP_220076.1	3329002
654	CT637	tyrB	Aromatic AA Aminotransferase	-1.30894	0.035186	NP_220154.1	3329085
398	CT388	-	hypothetical protein	-1.30949	0.0343056	NP_219898.1	3328814
364	CT356	yyaL	multidomain protein family	-1.31079	0.0322247	NP_219864.1	3328778
75	CT071	yaeM	hypothetical protein	-1.31141	0.0312322	NP_219574.1	3328465
886	CT864	xerD	Integrase/recombinase	-1.31241	0.0296315	NP_220386.1	3329338
298	CT292	dut	dUTP Nucleotidohydrolase	-1.31658	0.0229565	NP_219797.1	3328706
193	CT188	tdk	Thymidylate Kinase	-1.31905	0.0190027	NP_219692.1	3328593
70	CT066	-	hypothetical protein	-1.31919	0.0187786	NP_219569.1	3328460
453	CT441	tsp	Tail-Specific Protease	-1.32126	0.0154651	NP_219953.1	3328872
587	CT572	gspD	Gen. Secretion Protein D	-1.32166	0.0148248	NP_220087.1	3329013
887	CT865	-	hypothetical protein	-1.3233	0.0121997	NP_220387.1	3329339
125	CT121	araD	Ribulose-P Epimerase	-1.32958	0.00214711	NP_219624.1	3328520
781	CT762	murC/ddlA	UDP-N-acetylmuramate-alanine ligase/D-Ala-D-Ala Ligase	-1.33057	0.000562393	NP_220281.1	3329224
250	CT244	-	hypothetical protein	-1.33365	-0.00436783	NP_219749.1	3328654
784	CT765	rsbV_2	Sigma Regulatory Factor	-1.33427	-0.00536028	NP_220284.1	3329228
503	CT490	-	hypothetical protein	-1.33607	-0.00824158	NP_220004.1	3328926
501	CT488	-	hypothetical protein	-1.3372	-0.0100504	NP_220002.1	3328924
312	CT306	atpD	ATP Synthase Subunit D	-1.34221	-0.01807	NP_219811.1	3328722
695	CT676	-	hypothetical protein	-1.34302	-0.0193666	NP_220195.1	3329128
63	CT059	fer	Ferredoxin	-1.34445	-0.0216556	NP_219562.1	3328452
619	CT603	ahpC	Thio-specific Antioxidant (TSA) Peroxidase	-1.34683	-0.0254654	NP_220119.1	3329048
30	CT027	trmD	tRNA (guanine N-1) Methyltransferase	-1.35015	-0.0307798	NP_219529.1	3328417
358	CT350	-	hypothetical protein	-1.35294	-0.0352458	NP_219857.1	3328771
827	CT807	plsB	Glycerol-3-P Acyltransferase	-1.35513	-0.0387514	NP_220327.1	3329274
102	CT098	rs1	S1 Ribosomal Protein	-1.35551	-0.0393596	NP_219601.1	3328495
60	CT056	-	hypothetical protein	-1.3604	-0.0471872	NP_219559.1	3328449
254	CT248	glgP	Glycogen Phosphorylase	-1.36187	-0.0495402	NP_219753.1	3328658
438	CT428	ubiE	Ubiquinone Methyltransferase	-1.36379	-0.0526136	NP_219940.1	3328858
597	CT582	minD	chromosome partitioning ATPase-CHLTR plasmid protein homolog GP5D	-1.36501	-0.0545665	NP_220097.1	3329025
140	CT136	-	predicted Lysophospholipase esterase	-1.3659	-0.0559912	NP_219639.1	3328536
23	CT020	lepB	Signal Peptidase I	-1.366	-0.0561512	NP_219522.1	3328410
377	CT368	aroC	Chorismate Synthase	-1.37257	-0.066668	NP_219877.1	3328792
421	CT411	lpxB	Lipid A Disaccharide Synthase	-1.37567	-0.0716302	NP_219921.1	3328839
439	CT429	-	hypothetical protein	-1.38212	-0.0819549	NP_219941.1	3328859
527	CT513	rl18	L18 Ribosomal Protein	-1.38298	-0.0833315	NP_220028.1	3328950
359	CT351	-	hypothetical protein	-1.38324	-0.0837477	NP_219858.1	3328772
369	CT360	-	hypothetical protein	-1.38413	-0.0851723	NP_219869.1	3328783
609	CT594	ycfH	PHP superfamily hydrolase	-1.38491	-0.0864209	NP_220110.1	3329038
303	CT297	rnc	Ribonuclease III	-1.38569	-0.0876695	NP_219802.1	3328712
261	CT255	-	hypothetical protein	-1.38763	-0.0907749	NP_219760.1	3328666
509	CT495	-	ADP/ATP Translocase	-1.38879	-0.0926317	NP_220009.1	3328932
182	CT178	-	hypothetical protein	-1.38884	-0.0927117	NP_219682.1	3328582
649	CT632	-	hypothetical protein	-1.38885	-0.0927277	NP_220149.1	3329080
269	CT263	-	hypothetical protein	-1.38992	-0.0944405	NP_219768.1	3328675
318	CT312	-	predicted ferredoxin	-1.39293	-0.0992587	NP_219817.1	3328728
117	CT113	clpB	Clp Protease ATPase	-1.39597	-0.104125	NP_219616.1	3328511
142	CT138	-	Dipeptidase	-1.40164	-0.113201	NP_219641.1	3328538
801	CT782	cysS	Cysteinyl tRNA Synthetase	-1.40306	-0.115474	NP_220301.1	3329246
24	CT021	-	hypothetical protein	-1.40672	-0.121333	NP_219523.1	3328411
383	CT374	arcD	Arginine/Ornithine Antiporter	-1.4131	-0.131545	NP_219883.1	3328798
470	CT457	yebC	YebC family	-1.4134	-0.132025	NP_219970.1	3328890
56	CT052	hemN_1	Coproporphyrinogen III Oxidase	-1.4154	-0.135227	NP_219555.1	3328444
457	CT445	gltX	Glutamyl-tRNA Synthetase	-1.41754	-0.138652	NP_219958.1	3328877
642	CT625	nfo	Endonuclease IV	-1.41962	-0.141982	NP_220142.1	3329072
559	CT544	uhpC	Hexosphosphate Transport	-1.4201	-0.14275	NP_220059.1	3328983
385	CT376	mdhC	Malate Dehydrogenase	-1.42185	-0.145552	NP_219885.1	3328801
847	CT826	pssA	CDP-diacylglycerol-serine-O-phosphatidyltransferase	-1.42458	-0.149922	NP_220347.1	3329296
727	CT708	-	SWF/SNF family helicase	-1.42494	-0.150498	NP_220227.1	3329163
852	CT831	murB	UDP-N-Acetylenolpyruvoylglucosamine Reductase	-1.42628	-0.152643	NP_220352.1	3329302
879	CT849.1	-	hypothetical protein	-1.42754	-0.15466	NP_220371.1	3522913
97	CT093	ribF	Riboflavin kinase/FAD Synthase	-1.42757	-0.154708	NP_219596.1	3328489
488	CT475	pheT	phenylalanyl tRNA Synthetase Beta	-1.43061	-0.159574	NP_219988.1	3328910
460	CT448	secD/secF	SecD/SecF fusion protein	-1.43163	-0.161207	NP_219961.1	3328880
871	CT850	-	hypothetical protein	-1.43168	-0.161287	NP_220372.1	3329323
647	CT630	cpxR	HTH Transcriptional Regulatory Protein and Receiver Domain	-1.43477	-0.166233	NP_220147.1	3329077
807	CT788	-	leader (60) peptide-periplasmic	-1.43778	-0.171051	NP_220307.1	3329253
36	CT033	recD_1	Exodeoxyribonuclease V, Alpha	-1.43992	-0.174477	NP_219535.1	3328424
1	CT873	-	hypothetical protein	-1.44131	-0.176702	NP_220395.1	3329349
682	CT663	-	hypothetical protein	-1.44206	-0.177902	NP_220182.1	3329114
876	CT855	fumC	Fumarate Hydratase	-1.44539	-0.183233	NP_220377.1	3329328
545	CT530	fmt	Methionyl tRNA Formyltransferase	-1.45216	-0.19407	NP_220045.1	3328968
459	CT447	recJ	ssDNA Exonuclease	-1.45613	-0.200424	NP_219960.1	3328879
499	CT486	fliY	Glutamine Binding Protein	-1.45662	-0.201209	NP_220000.1	3328922
838	CT817	tyrP_1	Tyrosine Transport	-1.45767	-0.20289	NP_220338.1	6578114
331	CT325	-	hypothetical protein	-1.4584	-0.204058	NP_219830.1	3328743
782	CT763	-	hypothetical protein	-1.45884	-0.204762	NP_220282.1	3329225
181	CT177	dsbG	possible Disulfide Bond Chaperone	-1.45942	-0.205691	NP_219681.1	6578099
481	CT468	atoC	2-component regulatory system-ATPase	-1.45975	-0.206219	NP_219981.1	3328902
872	CT851	map	Methionine Aminopeptidase	-1.46037	-0.207211	NP_220373.1	3329324
491	CT478	oppC_2	Oligopeptide Permease	-1.46046	-0.207356	NP_219991.1	3328913
319	CT313	tal	Transaldolase	-1.46091	-0.208076	NP_219818.1	3328729
816	CT797	pgsA_2	CDP-diacylglycerol--glycerol-3-phosphate 3-phosphatidyltransferase	-1.46134	-0.208764	NP_220317.1	3329263
821	CT802	rs18	S18 Ribosomal Protein	-1.46366	-0.212478	NP_220322.1	3329268
560	CT545	dnaE	DNA Pol III Alpha	-1.46379	-0.212686	NP_220060.1	3328984
831	CT811	plsX	FA/Phospholipid Synthesis Protein	-1.46446	-0.213758	NP_220331.1	3329278
738	CT719	fliF	Flagellar M-Ring Protein	-1.46485	-0.214383	NP_220238.1	3329175
41	CT038	-	hypothetical protein	-1.46558	-0.215551	NP_219540.1	3328429
314	CT308	atpA	ATP Synthase Subunit A	-1.46626	-0.21664	NP_219813.1	3328724
710	CT691	-	hypothetical protein	-1.47292	-0.227301	NP_220210.1	3329144
166	CT162	-	hypothetical protein	-1.47298	-0.227397	NP_219665.1	3328565
614	CT599	tolB	component of a macromolecule transport system	-1.48272	-0.242988	NP_220115.1	3329043
121	CT117	-	hypothetical protein	-1.48288	-0.243244	NP_219620.1	3328515
72	CT068	ytgB_1	rRNA methylase	-1.48335	-0.243996	NP_219571.1	3328462
98	CT094	truB	tRNA Pseudouridine Synthase	-1.48373	-0.244604	NP_219597.1	3328490
819	CT800	pth	Peptidyl tRNA Hydrolase	-1.48646	-0.248974	NP_220320.1	3329266
826	CT806	ptr	Insulinase family/Protease III	-1.48728	-0.250287	NP_220326.1	3329273
480	CT467	atoS	2-component regulatory system-sensor histidine kinase	-1.48834	-0.251984	NP_219980.1	3328901
561	CT546	-	predicted OMP	-1.48906	-0.253136	NP_220061.1	3328985
273	CT267	ihfA	Integration Host Factor Alpha	-1.49327	-0.259875	NP_219772.1	3328679
740	CT721	yfhO_2	NifS-related protein	-1.4933	-0.259923	NP_220240.1	3329178
849	CT828	nrdB	Ribonucleoside Reductase, Small Chain	-1.4989	-0.268887	NP_220349.1	3329298
842	CT821	sucC	Succinyl-CoA Synthetase, Beta	-1.499	-0.269047	NP_220342.1	3329290
835	CT814.1	-	hypothetical protein	-1.50006	-0.270744	NP_220335.1	3329283
486	CT473	-	hypothetical protein	-1.50546	-0.279388	NP_219986.1	3328908
114	CT110	groEL_1	HSP-60	-1.50564	-0.279676	NP_219613.1	3328508
215	CT210	hemL	Glutamate-1-semialdehyde-2,1-aminomutase	-1.50716	-0.282109	NP_219714.1	3328618
537	CT523	rl22	L22 Ribosomal Protein	-1.50821	-0.28379	NP_220038.1	3328960
44	CT041	CT041	hypothetical protein	-1.51348	-0.292226	NP_219544.1	6578098
471	CT458	YhhY	Amino Group Acetyl Transferase	-1.51599	-0.296244	NP_219971.1	3328892
18	CT015	phoH	ATPase	-1.51701	-0.297876	NP_219517.1	3328404
850	CT829	yggH	putative rRNA Methylase	-1.51808	-0.299589	NP_220350.1	3329300
362	CT354	kgsA	Dimethyladenosine Transferase	-1.52228	-0.306312	NP_219862.1	3328775
492	CT479	oppB_2	Oligopeptide Permease	-1.52384	-0.308809	NP_219992.1	3328914
504	CT491	rho	Transcription Termination Factor	-1.52434	-0.30961	NP_220005.1	3328927
706	CT687	yfhO_1	NifS-related enzyme	-1.52731	-0.314364	NP_220206.1	3329140
520	CT506	rl17	L17 Ribosomal Protein	-1.52865	-0.316509	NP_220021.1	3328943
355	CT347	xerC	Integrase/recombinase	-1.52951	-0.317885	NP_219854.1	3328768
52	CT048	yraL	SAM-dependent methyltransferase	-1.52962	-0.318062	NP_219551.1	3328440
512	CT498	gidA	FAD-dependent oxidoreductase	-1.52985	-0.31843	NP_220013.1	3328935
873	CT852	yhgN	YhgN family	-1.53087	-0.320062	NP_220374.1	3329325
343	CT335	-	hypothetical protein	-1.53421	-0.325409	NP_219842.1	3328754
356	CT348	yjjK	ABC Transporter Protein ATPase	-1.54013	-0.334885	NP_219855.1	3328769
335	CT329	xseA	Exodoxyribonuclease VII	-1.54193	-0.337766	NP_219836.1	3328747
756	CT737	-	SET Domain protein	-1.54214	-0.338103	NP_220256.1	3329195
636	CT619	-	hypothetical protein	-1.54321	-0.339815	NP_220136.1	3329065
766	CT747	hemE	Uroporphyrinogen Decarboxylase	-1.54542	-0.343353	NP_220266.1	3329207
667	CT649	ygfA	Formyltetrahydrofolate synthetase	-1.54612	-0.344473	NP_220167.1	3329098
245	CT239	fabH	Oxoacyl Carrier Protein Synthase III	-1.54629	-0.344746	NP_219744.1	3328649
25	CT022	rl31	L31 Ribosomal Protein	-1.54685	-0.345642		3328412
775	CT756	murF	UDP-N-acetylmuramoylalanyl-D-glutamyl-2,6-diaminoligase	-1.54861	-0.348459	NP_220275.1	3329218
272	CT266	-	hypothetical protein	-1.54939	-0.349708	NP_219771.1	3328678
759	CT740	dmpP	Phenolhydrolase/NADH ubiquinone oxidoreductase	-1.55027	-0.351116	NP_220259.1	3329199
844	CT823	htrA	DO Serine Protease	-1.55044	-0.351389	NP_220344.1	3329293
242	CT221.1	-	hypothetical protein-possible frameshift with CT222	-1.55561	-0.359664	NP_219726.1	3522891
721	CT702	-	hypothetical protein	-1.55622	-0.360641	NP_220221.1	3329157
554	CT539	trxA	Thioredoxin	-1.55652	-0.361121	NP_220054.1	3328977
606	CT591	sdhB	Succinate Dehydrogenase	-1.55946	-0.365827	NP_220106.1	3329035
602	CT587	eno	Enolase	-1.56352	-0.372326	NP_220102.1	3329030
760	CT741	-	hypothetical protein	-1.5646	-0.374055	NP_220260.1	3329200
592	CT577	-	hypothetical protein	-1.5655	-0.375495	NP_220092.1	3329019
534	CT520	rl29	L29 Ribosomal Protein	-1.56785	-0.379257	NP_220035.1	3328957
780	CT761	murG	Peptidoglycan Transferase	-1.56802	-0.379529	NP_220280.1	3329223
572	CT557	lpdA	Lipoamide Dehydrogenase	-1.56816	-0.379753	NP_220072.1	3328997
601	CT586	uvrB	Exinuclease ABC Subunit B	-1.5683	-0.379977	NP_220101.1	3329029
218	CT213	rpiA	Ribose-5-P Isomerase A	-1.57166	-0.385356	NP_219717.1	3328621
472	CT459	-	Peptide Chain Release Factor 2	-1.57374	-0.388685	NP_219972.1	3328893
265	CT259	-	PP2C phosphatase family	-1.57934	-0.397649	NP_219764.1	3328670
604	CT589	-	hypothetical protein	-1.58212	-0.402099	NP_220104.1	3329032
301	CT295	mrsA_1	Phosphomannomutase	-1.58256	-0.402804	NP_219800.1	3328710
599	CT584	-	hypothetical protein	-1.58406	-0.405205	NP_220099.1	3329027
76	CT072	yaeL	Metalloprotease	-1.58691	-0.409767	NP_219575.1	3328467
643	CT626	rs4	S4 Ribosomal Protein	-1.58994	-0.414617	NP_220143.1	3329073
252	CT246	pdhB	Pyruvate Dehydrogenase Beta	-1.59046	-0.41545	NP_219751.1	3328656
135	CT131	-	Possible Transmembrane Protein	-1.59143	-0.417002	NP_219634.1	3328530
837	CT816	glmS	Glucosamine-Fructose-6-P Aminotransferase	-1.59297	-0.419467	NP_220337.1	3329285
809	CT790	-	hypothetical protein	-1.59354	-0.42038	NP_220309.1	3329255
542	CT528	rl3	L3 Ribosomal Protein	-1.59371	-0.420652	NP_220043.1	3328965
156	CT152	ycfV	ABC Transporter ATPase	-1.5956	-0.423677	NP_219655.1	3328554
440	CT430	dapF	Diaminopimelate Epimerase	-1.59667	-0.42539	NP_219942.1	3328860
281	CT275	dnaA_2	Replication Initiation Factor	-1.60095	-0.432241	NP_219780.1	3328688
586	CT571	gspE	Gen. Secretion Protein E	-1.60128	-0.432769	NP_220086.1	3329012
409	CT399	yrbH	GutQ/KpsF Family Sugar-P Isomerase	-1.60146	-0.433057	NP_219909.1	3328826
162	CT158	-	Phospholipase D endonuclease superfamily	-1.60193	-0.43381	NP_219661.1	3328561
239	CT234	-	C. psittaci hypothetical protein	-1.60264	-0.434946	NP_219739.1	3328643
786	CT767	-	Fe-S cluster oxidoreduase	-1.60371	-0.436659	NP_220286.1	3329230
248	CT242	-	OmpH-Like Outer Membrane Protein	-1.60422	-0.437475	NP_219747.1	3328652
67	CT063	gnd	6-Phosphogluconate Dehydrogenase	-1.60497	-0.438676	NP_219566.1	3328457
292	CT286	clpC	ClpC Protease ATPase	-1.60626	-0.440741	NP_219791.1	3328700
386	CT377	ltuA	hypothetical protein	-1.60686	-0.441701	NP_219886.1	3328802
48	CT044	ssb	SS DNA Binding Protein	-1.60775	-0.443126	NP_219547.1	3328436
877	CT856	ychM	Sulfate Transporter	-1.60922	-0.445479	NP_220378.1	3329329
585	CT570	gspF	Gen. Secretion Protein F	-1.61022	-0.44708	NP_220085.1	3329011
328	CT322	tufA	Elongation Factor Tu	-1.61156	-0.449225	NP_219827.1	3328740
516	CT502	ruvC	Crossover Junction Endonuclease	-1.61211	-0.450105	NP_220017.1	3328939
555	CT540	yibK	rRNA Methylase (SpoU family)	-1.61706	-0.458029	NP_220055.1	3328978
153	CT149	-	possible hydrolase	-1.61902	-0.461166	NP_219652.1	3328551
757	CT738	yycJ	metal dependent hydrolase	-1.61915	-0.461374	NP_220257.1	3329196
645	CT628	ispA	Geranylgeranyl pyrophosphate synthase	-1.6216	-0.465296	NP_220145.1	3329075
154	CT150	rl33	L33 Ribosomal Protein	-1.62289	-0.467361	NP_219653.1	3328552
679	CT660	gyrA_2	DNA Gyrase Subunit A	-1.62478	-0.470386	NP_220179.1	3329110
497	CT484	-	hypothetical protein	-1.63452	-0.485977	NP_219998.1	3328920
284	CT278	nqr2	NADH (Ubiquinone) Dehydrogenase	-1.63498	-0.486714	NP_219783.1	3328691
628	CT612	folA	Dihydrofolate Reductase	-1.63555	-0.487626	NP_220129.1	3329057
188	CT183	pyrG	CTP Synthetase	-1.6391	-0.493309	NP_219687.1	3328588
856	CT835	rl20	L20 Ribosomal Protein	-1.64134	-0.496894	NP_220356.1	3329306
309	CT303	-	hypothetical protein	-1.64378	-0.5008	NP_219808.1	3328719
17	CT014	cydB	Cytochrome Oxidase Subunit II	-1.6478	-0.507235	NP_219516.1	3328403
839	CT818	tyrP_2	Tyrosine Transport	-1.64907	-0.509268	NP_220339.1	3329287
287	CT281	nqr5	NADH (Ubiquinone) Reductase 5	-1.64909	-0.5093	NP_219786.1	3328694
661	CT643	topA	DNA Topoisomerase I-Fused to SWI Domain	-1.65213	-0.514166	NP_220161.1	3329092
634	CT617	rs20	S20 Ribosomal Protein	-1.65359	-0.516503	NP_220134.1	3329063
498	CT485	hemZ	Ferrochetalase	-1.65623	-0.520729	NP_219999.1	3328921
596	CT581	thrS	Threonyl tRNA Synthetase	-1.6581	-0.523722	NP_220096.1	6578108
475	CT462	ygbP	Sugar Nucleotide Phosphorylase	-1.65904	-0.525227	NP_219975.1	3328896
791	CT772	ppa	Inorganic Pyrophosphatase	-1.66092	-0.528236	NP_220291.1	3329235
846	CT825	-	hypothetical protein	-1.66155	-0.529245	NP_220346.1	3329295
578	CT563	yscS	Yop proteins translocation protein S	-1.66297	-0.531518	NP_220078.1	3329004
511	CT497	dnaB	Replicative DNA Helicase	-1.66424	-0.533551	NP_220012.1	3328934
282	CT276	-	hypothetical protein	-1.66448	-0.533935	NP_219781.1	3328689
717	CT698	thdF	Thiophene/Furan Oxidation Protein	-1.66544	-0.535472	NP_220217.1	3329152
848	CT827	nrdA	Ribonucleoside Reductase, Large Chain	-1.66741	-0.538625	NP_220348.1	6578115
372	CT363	asd	Aspartate semialdehyde dehydrogenase	-1.66812	-0.539762	NP_219872.1	3328786
129	CT125	rl13	L13 Ribosomal Protein	-1.66952	-0.542003	NP_219628.1	3328524
841	CT820	ftsY	Cell Division Protein FtsY	-1.67031	-0.543267	NP_220341.1	3329289
244	CT238	fabD	Malonyl CoA-Acyl Carrier Transacylase	-1.67146	-0.545108	NP_219743.1	3328648
796	CT777	bioF	8-amino-7-oxononanoate synthase	-1.67191	-0.545828	NP_220296.1	3329241
15	CT012	ybbP	hypothetical protein	-1.67516	-0.551031	NP_219514.1	3328401
696	CT677	rrf	Ribosome Releasing Factor	-1.6791	-0.557338	NP_220196.1	3329129
31	CT028	rl19	L19 Ribosomal Protein	-1.68073	-0.559947	NP_219530.1	3328418
207	CT202	oppF	Oligopeptide Transport ATPase	-1.68105	-0.560459	NP_219706.1	3328608
630	CT614	folX	Dihydroneopterin Aldolase	-1.68144	-0.561083	NP_220131.1	3329059
59	CT055	sucB_1	Dihydrolipoamide Succinyltransferase	-1.68251	-0.562796	NP_219558.1	3328448
348	CT340	pdhA/B	(pyruvate) Oxoisovalerate Dehydrogenase Alpha/Beta Fusion	-1.68313	-0.563789	NP_219847.1	3328760
867	CT846	-	hypothetical protein	-1.68421	-0.565517	NP_220367.1	3329318
857	CT836	pheS	Phenylalanyl tRNA Synthetase, Alpha	-1.68435	-0.565741	NP_220357.1	3329307
361	CT353	def	Polypeptide Deformylase	-1.68635	-0.568943	NP_219861.1	3328774
34	CT031	-	hypothetical protein	-1.69306	-0.579684	NP_219533.1	3328421
556	CT541	mip	FKBP-type peptidyl-prolyl cis-trans isomerase	-1.69511	-0.582965		3328979
220	CT215	dhnA	Predicted 1,6-Fructose biphosphate aldolase (dehydrin family)	-1.69581	-0.584086	NP_219719.1	3328623
99	CT095	rbfA	Ribosome Binding Factor A	-1.69769	-0.587095	NP_219598.1	3328491
865	CT844	yfhC	cytosine deaminase	-1.6979	-0.587431	NP_220365.1	3329316
728	CT709	mreB	Rod Shape Protein-Sugar Kinase	-1.69886	-0.588968	NP_220228.1	3329164
165	CT161	-	hypothetical protein	-1.70037	-0.591385	NP_219664.1	3328564
132	CT128	adk	adenylate kinase	-1.70425	-0.597596		3328527
391	CT382	aroG	phospho-2-dehydro-3-deoxyheptonate aldolase	-1.70521	-0.599132	NP_219891.1	3328807
262	CT256	-	Hypothetical protein containing CBS domains	-1.70819	-0.603903	NP_219761.1	3328667
442	CT432	glyA	Serine Hydroxymethyltransferase	-1.713	-0.611602	NP_219944.1	3328862
523	CT509	rs13	S13 Ribosomal Protein	-1.71398	-0.613171	NP_220024.1	3328946
413	CT403	yjfH	rRNA Methylase (SpoU family)	-1.71656	-0.617301	NP_219913.1	3328830
264	CT258	yhfO	NifS family of pyridoxal phosphate-dependent enzymes	-1.7196	-0.622167	NP_219763.1	3328669
529	CT515	rs8	S8 Ribosomal Protein	-1.72343	-0.628298	NP_220030.1	3328952
548	CT533	lpxC	UDP-3-O-Acyl GlcNAc Deacetylase	-1.72971	-0.63835	NP_220048.1	3328971
416	CT406	-	hypothetical protein	-1.73151	-0.641232	NP_219916.1	3328834
204	CT199	oppB_1	Oligopeptide Permease	-1.73281	-0.643312	NP_219703.1	3328605
494	CT481	-	hypothetical protein	-1.73447	-0.64597	NP_219995.1	3328917
794	CT775	-	snGlycerol 3-P Acyltransferase	-1.73651	-0.649235	NP_220294.1	3329239
625	CT609	rpoN	RNA Polymerase Sigma-54	-1.73754	-0.650884	NP_220126.1	3329054
655	CT638	-	hypothetical protein	-1.73765	-0.65106	NP_220155.1	3329086
788	CT769	ybeB	iojap superfamily ortholog	-1.73911	-0.653397	NP_220288.1	3329232
795	CT776	aas	Acylglycerophosphoethanolamine Acyltransferase	-1.74356	-0.66052	NP_220295.1	3329240
617	CT593.1	-	hypothetical protein-possible frameshift with CT593	-1.74427	-0.661657	NP_220109.1	3522902
390	CT381	artJ	Arginine Binding Protein	-1.74739	-0.666651	NP_219890.1	3328806
278	CT272	yabC	PBP2B Family methyltransferase	-1.74853	-0.668476	NP_219777.1	3328685
57	CT053	-	hypothetical protein	-1.75014	-0.671053	NP_219556.1	3328445
216	CT211	-	hypothetical protein	-1.75226	-0.674447	NP_219715.1	3328619
363	CT355	-	hypothetical protein	-1.75318	-0.675919	NP_219863.1	3328776
235	CT230	-	Neutral Amino Acid (Glutamate) Transporter	-1.7542	-0.677552	NP_219735.1	3328639
130	CT126	rs9	S9 Ribosomal Protein	-1.75487	-0.678624	NP_219629.1	3328525
339	CT331	dxs	Transketolase	-1.75921	-0.685572	NP_219838.1	3328750
289	CT283	-	hypothetical protein	-1.76166	-0.689493	NP_219788.1	3328696
678	CT659	-	hypothetical protein	-1.763	-0.691638	NP_220178.1	3329109
701	CT682	pbpB	PBP2-transglycolase/transpeptidase	-1.76373	-0.692807	NP_220201.1	3329134
61	CT057	gcpE	hypothetical protein	-1.7646	-0.694199	NP_219560.1	3328450
436	CT426	-	Fe-S oxidoreductase	-1.76992	-0.702715	NP_219938.1	3328856
566	CT551	dacC	D-Ala-D-Ala Carboxypeptidase	-1.77341	-0.708302	NP_220066.1	3328991
321	CT315	rpoB	RNA Polymerase Beta	-1.77875	-0.71685	NP_219820.1	3328732
276	CT270	pbp3	transglycolase/transpeptidase	-1.78015	-0.719091	NP_219775.1	3328683
173	CT169	trpR	Trp Operon Repressor	-1.78039	-0.719475	NP_219672.1	3328572
772	CT753	-	hypothetical protein	-1.78386	-0.725029	NP_220272.1	3329214
214	CT209	leuS	Leucyl tRNA Synthetase	-1.78503	-0.726902	NP_219713.1	3328616
400	CT390	aspC	Aspartate Aminotransferase	-1.78693	-0.729944	NP_219900.1	6578104
429	CT419	rl27	L27 Ribosomal Protein	-1.78727	-0.730488	NP_219929.1	3328848
670	CT652	recD_2	Exodeoxyribonuclease V, Alpha	-1.78869	-0.732761	NP_220170.1	3329101
680	CT661	gyrB_2	DNA Gyrase Subunit B	-1.79402	-0.741293	NP_220180.1	3329111
546	CT531	lpxA	Acyl-Carrier UDP-GlcNAc O-Acyltransferase	-1.79644	-0.745166	NP_220046.1	3328969
342	CT334	dnaX_2	DNA Pol III Gamma and Tau	-1.80038	-0.751473	NP_219841.1	3328753
836	CT815	mrsA_2	Phosphoglucomutase	-1.80351	-0.756484	NP_220336.1	3329284
388	CT379	hflX	GTP Binding Protein	-1.80466	-0.758324	NP_219888.1	3328804
686	CT667	-	hypothetical protein	-1.81133	-0.769001	NP_220186.1	3329118
843	CT822	sucD	Succinyl-CoA Synthetase, Alpha	-1.81559	-0.77582	NP_220343.1	3329291
525	CT511	rl15	L15 Ribosomal Protein	-1.82191	-0.785937	NP_220026.1	3328948
376	CT367	aroL	Shikimate Kinase II	-1.82206	-0.786177	NP_219876.1	3328791
299	CT293	accD	AcCoA Carboxylase/Transferase Beta	-1.82421	-0.789619	NP_219798.1	3328707
861	CT840	mesJ	PP-loop superfamily ATPase	-1.83151	-0.801304	NP_220361.1	3329312
26	CT023	pfrA	Peptide Chain Releasing Factor (RF-1)	-1.83562	-0.807883	NP_219525.1	3328413
144	CT140	ypdP	hypothetical protein	-1.83637	-0.809083	NP_219643.1	3328540
103	CT099	trxB	Thioredoxin Reductase	-1.8376	-0.811052	NP_219602.1	3328496
441	CT431	clpP_1	CLP Protease	-1.83808	-0.811821	NP_219943.1	3328861
302	CT296	-	hypothetical protein	-1.83843	-0.812381	NP_219801.1	3328711
769	CT750	tktB	Transketolase	-1.84161	-0.817471	NP_220269.1	3329211
80	CT076	smpB	Small Protein B	-1.84258	-0.819024	NP_219579.1	3328471
42	CT039	dcd	Deoxycytidine triphosphate deaminase family protein	-1.84279	-0.81936	NP_219541.1	3328430
209	CT204	ybhI	Dicarboxylate Translocator	-1.84463	-0.822305	NP_219708.1	3328611
641	CT624	mviN	Integral Membrane Protein	-1.84704	-0.826163	NP_220141.1	3329071
707	CT688	parB	Chromosome Partitioning Protein	-1.85105	-0.832582	NP_220207.1	3329141
192	CT187	dnaX_1	DNA Pol III Gamma and Tau	-1.85122	-0.832854	NP_219691.1	3328592
583	CT568	-	hypothetical protein	-1.85565	-0.839945	NP_220083.1	3329009
742	CT723	yjbC	predicted pseudouridine synthase	-1.85621	-0.840842	NP_220242.1	3329180
370	CT361	dapA	Dihydrodipicolinate Synthase	-1.8593	-0.845788	NP_219870.1	3328784
718	CT699	psdD	Phosphatidylserine Decarboxylase	-1.86112	-0.848701	NP_220218.1	3329153
514	CT500	ndk	Nucleoside-2-P Kinase	-1.86336	-0.852287	NP_220015.1	3328937
531	CT517	rl24	L24 Ribosomal Protein	-1.86989	-0.86274	NP_220032.1	3328954
349	CT341	dnaJ	Heat Shock Protein J	-1.87066	-0.863972	NP_219848.1	3328761
519	CT505	gapA	Glyceraldehyde-3-P Dehydrogenase	-1.87233	-0.866645	NP_220020.1	3328942
884	CT862	lcrH_2	Low Calcium Response Protein H	-1.87373	-0.868886	NP_220384.1	3329336
510	CT496	pgsA_1	CDP-diacylglycerol--glycerol-3-phosphate 3-phosphatidyltransferase	-1.8782	-0.876042	NP_220010.1	3328933
257	CT251	-	60kDa Inner Membrane Protein	-1.88127	-0.880956	NP_219756.1	3328662
222	CT217	ydaO	PP-Loop Superfamily ATPase	-1.88146	-0.88126	NP_219721.1	3328625
198	CT193	tgt	Queuine tRNA Ribosyl Transferase	-1.88427	-0.885758	NP_219697.1	3328599
644	CT627	yceA	hypothetical protein	-1.88691	-0.889984	NP_220144.1	3329074
623	CT607	ung	Uracil DNA Glycosylase	-1.89202	-0.898164	NP_220124.1	3329052
71	CT067	ytgA	Solute Protein Binding Family	-1.89375	-0.900933	NP_219570.1	3328461
771	CT752	efp_2	Elongation Factor P	-1.89829	-0.9082	NP_220271.1	3329213
621	CT605	ybbC	hypothetical protein	-1.90097	-0.91249	NP_220121.1	3329050
447	CT435	cysJ	Sulfite Reductase	-1.9012	-0.912858	NP_219947.1	3328866
744	CT725	birA	Biotin Synthetase	-1.91003	-0.926993	NP_220244.1	3329182
822	CT803	rl9	L9 Ribosomal Protein	-1.91069	-0.928049	NP_220323.1	3329269
6	CT003	gatA	Glu-tRNA Gln Amidotransferase (A subunit)	-1.91396	-0.933283	NP_219505.1	3328391
477	CT464	-	Phosphoglycolate Phosphatase	-1.91546	-0.935685	NP_219977.1	3328898
733	CT714	gpdA	Glycerol-3-P Dehydrogenase	-1.91801	-0.939766	NP_220233.1	3329170
305	CT299	hemC	Porphobilinogen Deaminase	-1.92756	-0.955053	NP_219804.1	3328714
449	CT437	fusA	Elongation Factor G	-1.9277	-0.955277	NP_219949.1	3328868
800	CT781	lysS	Lysyl tRNA Synthetase	-1.9285	-0.956558	NP_220300.1	3329245
748	CT729	serS	Seryl tRNA Synthetase	-1.93008	-0.959087	NP_220248.1	3329186
858	CT837	-	hypothetical protein	-1.93421	-0.965698	NP_220358.1	3329308
697	CT678	pyrH	UMP Kinase	-1.94351	-0.980585	NP_220197.1	3329130
27	CT024	-	N6-adenine-specific DNA methylase	-1.9447	-0.98249	NP_219526.1	3328414
112	CT108	ybgI	ACR family	-1.94748	-0.98694	NP_219611.1	3328505
304	CT298	radA	DNA repair protein	-1.95077	-0.992206	NP_219803.1	3328713
863	CT842	pnp	Polyribonucleotide Nucleotidyltransferase	-1.95157	-0.993487	NP_220363.1	3329314
290	CT284	-	Phospholipase D superfamily	-1.95295	-0.995696	NP_219789.1	3328698
12	CT009	yfgA	HTH Transcriptional Regulator	-1.95755	-1.00306	NP_219511.1	6578097
258	CT252	lgt	Prolipoprotein Diacylglycerol Transferase	-1.96398	-1.01335	NP_219757.1	3328663
108	CT104	fabI	Enoyl-Acyl-Carrier Protein Reductase	-1.97596	-1.03253	NP_219607.1	3328501
271	CT265	accA	AcCoA Carboxylase/Transferase Alpha	-1.97775	-1.03539	NP_219770.1	3328677
888	CT866	glgB	1, 4-alpha-glucan branching enzyme	-1.98397	-1.04535	NP_220388.1	3329340
724	CT705	clpX	CLP Protease ATPase	-1.98536	-1.04758	NP_220224.1	3329160
308	CT302	valS	Valyl tRNA Synthetase	-1.98791	-1.05166	NP_219807.1	3328717
776	CT757	mraY	Muramoyl-Pentapeptide Transferase	-1.9959	-1.06445	NP_220276.1	3329219
65	CT061	fliA	Sigma-28/WhiG Family	-1.99997	-1.07096	NP_219564.1	3328455
464	CT451	cdsA	Phosphatidate Cytidylytransferase	-2.00281	-1.07551	NP_219964.1	3328884
341	CT333	uvrA	Excinuclease ABC Subunit A	-2.00853	-1.08466	NP_219840.1	3328752
528	CT514	rl6	L6 Ribosomal Protein	-2.00893	-1.0853	NP_220029.1	3328951
115	CT111	groES	10KDa Chaperonin	-2.01073	-1.08819	NP_219614.1	3328509
582	CT567	-	hypothetical protein	-2.01639	-1.09725	NP_220082.1	3329008
240	CT235	-	cAMP-Dependent Protein Kinase Regulatory Subunit	-2.01781	-1.09952	NP_219740.1	3328644
249	CT243	lpxD	UDP-3-O-[3-hydroxymyristoyl] glucosamine N-acyltransferase	-2.02198	-1.10619	NP_219748.1	3328653
263	CT257	-	hypothetical protein	-2.0261	-1.11279	NP_219762.1	3328668
270	CT264	msbA	Transport ATP Binding Protein	-2.03199	-1.12222	NP_219769.1	3328676
326	CT320	nusG	Transcriptional termination protein	-2.03464	-1.12646	NP_219825.1	3328738
411	CT401	gltT	Glutamate Symport	-2.03505	-1.12711	NP_219911.1	3328828
779	CT760	ftsW	Cell Division Protein FtsW	-2.03613	-1.12884	NP_220279.1	3329222
828	CT808	cafE	Axial Filament Protein	-2.04147	-1.13739	NP_220328.1	3329275
94	CT090	lcrD	Low Calcium Response D	-2.05468	-1.15854	NP_219593.1	3328486
256	CT250	dnaA_1	Replication Initiation Factor	-2.05566	-1.16011	NP_219755.1	3328661
557	CT542	aspS	Aspartyl tRNA Synthetase	-2.05604	-1.16071	NP_220057.1	3328981
551	CT536	dnaQ_2	DNA Pol III Epsilon Chain	-2.06175	-1.16985	NP_220051.1	3328974
396	CT382.1	-	hypothetical protein	-2.07092	-1.18453	NP_219892.1	3522894
612	CT597	exbD	Biopolymer Transport Protein	-2.07419	-1.18977	NP_220113.1	3329041
243	CT237	fabG	Oxoacyl (Carrier Protein) Reductase	-2.07515	-1.1913	NP_219742.1	3328647
22	CT019	ileS	Isoleucyl-tRNA Synthetase	-2.0758	-1.19234	NP_219521.1	3328409
461	CT444.1	-	hypothetical protein	-2.07766	-1.19532	NP_219957.1	3522897
723	CT704	pcnB_2	Poly A Polymerase	-2.07822	-1.19622	NP_220223.1	3329159
43	CT040	ruvB	Holliday Junction Helicase	-2.08009	-1.19921	NP_219543.1	3328431
127	CT123	accB	Biotin Carboxyl Carrier Protein	-2.08185	-1.20203	NP_219626.1	3328522
506	CT493	polA	DNA Polymerase I	-2.08462	-1.20646	NP_220007.1	3328929
702	CT683	-	TPR-motif protein	-2.08526	-1.20749	NP_220202.1	3329135
450	CT438	rs7	S7 Ribosomal Protein	-2.0916	-1.21764	NP_219950.1	3328869
811	CT792	mutS	DNA Mismatch Repair	-2.09376	-1.22109	NP_220311.1	3329257
107	CT103	-	HAD superfamily hydrolase/phosphatase	-2.09457	-1.22239	NP_219606.1	3328500
751	CT732	ribE	Ribityllumazine Synthase	-2.09837	-1.22847	NP_220251.1	3329190
175	CT171	trpA	Tryptophan Synthase (Alpha Chain)	-2.10065	-1.23212	NP_219674.1	3328575
241	CT236	acpP	Acyl Carrier Protein	-2.10576	-1.2403	NP_219741.1	3328645
589	CT574	pepP	Aminopeptidase P	-2.10806	-1.24398	NP_220089.1	3329016
817	CT798	glgA	Glycogen Synthase	-2.11446	-1.25423	NP_220318.1	3329264
145	CT141	secA_1	Protein Translocase	-2.11449	-1.25428	NP_219644.1	3328541
797	CT778	priA	Primosomal Protein N'	-2.11521	-1.25543	NP_220297.1	3329242
533	CT519	rs17	S17 Ribosomal Protein	-2.12052	-1.26393	NP_220034.1	3328956
708	CT689	dppF	ABC Transport ATPase	-2.12069	-1.2642	NP_220208.1	3329142
195	CT190	gyrB_1	DNA Gyrase Subunit B	-2.12443	-1.27019	NP_219694.1	3328595
777	CT758	murD	UDP-N-acetylmuramoylalanine-D-glutamate ligase	-2.12761	-1.27528	NP_220277.1	3329220
451	CT439	rs12	S12 Ribosomal Protein	-2.12931	-1.278		6578105
803	CT784	rnpA	Ribonuclease P Protein Component	-2.12977	-1.27874	NP_220303.1	3329249
539	CT525	rl2	L2 Ribosomal Protein	-2.13826	-1.29233	NP_220040.1	3328962
607	CT592	sdhA	Succinate Dehydrogenase	-2.14397	-1.30147	NP_220107.1	3329036
535	CT521	rl16	L16 Ribosomal Protein	-2.14755	-1.3072	NP_220036.1	3328958
68	CT064	lepA	GTPase	-2.15239	-1.31494	NP_219567.1	3328458
538	CT524	rs19	S19 Ribosomal Protein	-2.16083	-1.32845	NP_220039.1	3328961
334	CT328	tpiS	Triosephosphate Isomerase	-2.16347	-1.33268	NP_219835.1	3328746
415	CT405	ribC	Riboflavin Synthase	-2.17666	-1.35379	NP_219915.1	3328832
293	CT287	ycbF	PP-loop superfamily ATPase	-2.18006	-1.35924	NP_219792.1	3328701
88	CT084	-	Phopholipase D Superfamily	-2.18177	-1.36197	NP_219587.1	3328479
530	CT516	rl5	L5 Ribosomal Protein	-2.18226	-1.36276	NP_220031.1	3328953
624	CT608	uvrD	DNA Helicase	-2.18667	-1.36982	NP_220125.1	3329053
403	CT393	proS	Prolyl tRNA Synthetase	-2.18822	-1.3723	NP_219903.1	3328819
322	CT316	rl7	L7/L12 Ribosomal Protein	-2.18972	-1.3747	NP_219821.1	3328733
324	CT318	rl1	L1 Ribosomal Protein	-2.19086	-1.37652	NP_219823.1	3328735
699	CT680	rs2	S2 Ribosomal Protein	-2.19442	-1.38222	NP_220199.1	3329132
320	CT314	rpoC	RNA Polymerase Beta'	-2.19774	-1.38754	NP_219819.1	3328731
329	CT323	infA	Initiation Factor IF-1	-2.20118	-1.39304	NP_219828.1	3328741
448	CT436	rs10	S10 Ribosomal Protein	-2.20138	-1.39336	NP_219948.1	3328867
194	CT189	gyrA_1	DNA Gyrase Subunit A	-2.2063	-1.40124	NP_219693.1	3328594
709	CT690	dppD	ABC Transport ATPase	-2.21029	-1.40763	NP_220209.1	3329143
150	CT146	dnlJ	DNA Ligase	-2.21261	-1.41134	NP_219649.1	3328547
433	CT423	-	CBS Domain protein	-2.21315	-1.4122	NP_219935.1	3328853
688	CT669	yscN	Yops secretion ATPase	-2.21447	-1.41432	NP_220188.1	3329120
878	CT857	-	IM protein	-2.2148	-1.41484	NP_220379.1	3329330
426	CT416	-	ABC Transporter ATPase	-2.21685	-1.41813	NP_219926.1	3328845
631	CT615	rpoD	RNA Polymerase Sigma-66	-2.22249	-1.42715	NP_220132.1	3329060
750	CT731	ribA/ribB	GTP Cyclohydratase/DHBP Synthase	-2.22989	-1.439	NP_220250.1	3329189
133	CT129	glnP	ABC Amino Acid Transporter Permease	-2.23122	-1.44113	NP_219632.1	3328528
524	CT510	secY	Translocase	-2.23444	-1.44628	NP_220025.1	3328947
206	CT201	oppD	Oligopeptide Transport ATPase	-2.23878	-1.45323	NP_219705.1	3328607
202	CT197	gcp_1	O-Sialoglycoprotein Endopeptidase	-2.24114	-1.45701	NP_219701.1	3328603
78	CT074	recF	ABC superfamily ATPase	-2.25535	-1.47975	NP_219577.1	3328469
13	CT010	htrB	Acyltransferase	-2.25638	-1.4814	NP_219512.1	3328398
407	CT397	vacB	Ribonuclease Family	-2.26269	-1.4915	NP_219907.1	3328824
387	CT378	pgi	Glucose-6-P Isomerase	-2.26405	-1.49368	NP_219887.1	3328803
344	CT336	ptsI	PTS PEP Phosphotransferase	-2.27261	-1.50738	NP_219843.1	3328755
792	CT773	ldh	Leucine Dehydrogenase	-2.27882	-1.51732	NP_220292.1	3329236
246	CT240	recR	Recombination Protein	-2.28267	-1.52349	NP_219745.1	3328650
536	CT522	rs3	S3 Ribosomal Protein	-2.28588	-1.52862		3328959
789	CT770	fabF	Acyl Carrier Protein Synthase	-2.28652	-1.52965	NP_220289.1	3329233
419	CT409	-	Amino acid permease	-2.2889	-1.53346	NP_219919.1	3328837
668	CT650	recA	hypothetical protein	-2.28908	-1.53375	NP_220168.1	3329099
476	CT463	truA	Pseudouridylate Synthase I	-2.28997	-1.53517	NP_219976.1	3328897
754	CT735	dagA_2	D-Ala/Gly Permease	-2.29504	-1.54329	NP_220254.1	3329193
762	CT743	hctA	Histone-Like Developmental Protein	-2.29929	-1.55009	NP_220262.1	3329202
394	CT385	ycfF	Hit Family Hydrolase	-2.30679	-1.5621	NP_219895.1	3328810
384	CT375	-	predicted D-Amino Acid Dehydrogenase	-2.31111	-1.56901	NP_219884.1	3328800
101	CT097	nusA	Transcription antitermination factor	-2.31256	-1.57133	NP_219600.1	3328493
406	CT396	dnaK	HSP-70	-2.31488	-1.57505	NP_219906.1	3328822
595	CT580	-	hypothetical protein	-2.31546	-1.57597	NP_220095.1	3329022
862	CT841	ftsH	ATP-dependent zinc protease	-2.32336	-1.58862	NP_220362.1	3329313
463	CT450	yaeS	YaeS family	-2.32474	-1.59083	NP_219963.1	3328883
547	CT532	fabZ	Hydroxymyristoyl-(acyl carrier protein) dehydratase	-2.32589	-1.59267	NP_220047.1	3328970
226	CT221	yqfU	hypothetical protein	-2.33004	-1.59931	NP_219725.1	3328629
90	CT086	rl28	L28 Ribosomal Protein	-2.33697	-1.61041	NP_219589.1	3328482
104	CT100	acpS	Acyl-carrier Protein Synthase	-2.34083	-1.61658	NP_219603.1	3328497
223	CT218	surE	SurE-like Acid Phosphatase	-2.34366	-1.62111	NP_219722.1	6578101
134	CT130	glnQ	ABC Amino Acid Transporter ATPase	-2.34905	-1.62974	NP_219633.1	3328529
650	CT633	hemB	Porphobilinogen Synthase	-2.34918	-1.62995	NP_220150.1	3329081
864	CT843	rs15	S15 Ribosomal Protein	-2.35011	-1.63144	NP_220364.1	6578117
550	CT535	yciA	Acyl-CoA Thioester Hydrolase	-2.35156	-1.63376	NP_220050.1	3328973
745	CT726	rodA	Rod Shape Protein	-2.36184	-1.65022	NP_220245.1	3329183
32	CT029	rnhB_2	Ribonuclease HII	-2.36253	-1.65132	NP_219531.1	3328419
704	CT685	-	ABC Transporter ATPase	-2.36899	-1.66166	NP_220204.1	3329138
515	CT501	ruvA	Holliday Junction Helicase	-2.38738	-1.6911	NP_220016.1	3328938
806	CT787	rs14	S14 Ribosomal Protein	-2.39262	-1.69949	NP_220306.1	3329252
507	CT494	sohB	Protease	-2.40054	-1.71216	NP_220008.1	6578107
350	CT342	rs21	S21 Ribosomal Protein	-2.4045	-1.7185	NP_219849.1	3328762
128	CT124	accC	Biotin Carboxylase	-2.40733	-1.72303	NP_219627.1	3328523
96	CT092	ychF	GTP Binding Protein	-2.41948	-1.74248	NP_219595.1	3328488
600	CT585	trpS	Tryptophanyl tRNA Synthetase	-2.4563	-1.80142	NP_220100.1	3329028
712	CT693	pgk	Phosphoglycerate Kinase	-2.47434	-1.8303	NP_220212.1	3329146
540	CT526	rl23	L23 Ribosomal Protein	-2.48295	-1.84408	NP_220041.1	3328963
325	CT319	rl11	L11 Ribosomal Protein	-2.48669	-1.85007	NP_219824.1	3328736
16	CT013	cydA	Cytochrome Oxidase Subunit I	-2.48845	-1.85288	NP_219515.1	3328402
333	CT327	trpC	Phosphoribosylanthranilate Isomerase	-2.48913	-1.85397	NP_219834.1	3328745
672	CT653	yhbG	ABC Transporter ATPase	-2.4944	-1.86241	NP_220172.1	3329103
373	CT364	dapB	Dihydrodipicolinate Reductase	-2.50988	-1.88719	NP_219873.1	3328787
522	CT508	rs11	S11 Ribosomal Protein	-2.5201	-1.90355	NP_220023.1	3328945
82	CT078	folD	Methylene Tetrahydrofolate Dehydrogenase	-2.52024	-1.90377	NP_219581.1	3328473
854	CT833	infC	Initiation Factor 3	-2.52845	-1.91691	NP_220354.1	6578116
428	CT418	yhbZ	GTP Binding Protein	-2.54533	-1.94393	NP_219928.1	3328847
526	CT512	rs5	S5 Ribosomal Protein	-2.55018	-1.9517	NP_220027.1	3328949
288	CT282	gcsH	Glycine Cleavage System H Protein	-2.62686	-2.07444	NP_219787.1	3328695
286	CT280	nqr4	NADH (Ubiquinone) Reductase 4	-2.68214	-2.16293	NP_219785.1	3328693
532	CT518	rl14	L14 Ribosomal Protein	-2.71944	-2.22263	NP_220033.1	3328955
174	CT170	trpB	Tryptophan Synthase (Beta Chain)	-2.79154	-2.33805	NP_219673.1	3328574
725	CT706	clpP_2	CLP Protease	-2.98638	-2.64993	NP_220225.1	3329161
323	CT317	rl10	L10 Ribosomal Protein	-3.04631	-2.74586	NP_219822.1	3328734

## Sheet: S. typhimurium
Source: Salmonella typhimurium LT2 (AE006468, AE006471)
BIOID	ID	Name	Description	STMtoSTM Score	STMtoSTM Zscore	PSYtoSTM Score	PSYtoSTM Zscore	MeanZscores	STMpPSYtoSTM Score	STMpPSYtoSTM Zscore	Class	%GC	Ecoli	Mamm	Lawley/Monack	Chan/Falkow Macrophage	Chan/Falkow mouse	Chae/Morgan	Shah/Wallis	VirSum
4516	PSLT037	spvD	Salmonella plasmid virulence: hydrophilic protein	-0.05242	4.27749	-0.48792	2.75547	3.51648	0.05628	4.13004	0	0.329	0	0	0	0	0	0	0	0
2673	STM2762		putative inner membrane protein	-0.0627	4.22494	-0.61129	1.68308	2.95401	-0.06628	3.60392	0	0.31	0.08	0.084	0	0	0	0	0	0
1057	STM1089		putative inner membrane protein	-0.08596	4.10603	-0.53123	2.379	3.24251	-0.01849	3.80907	0	0.356	0	0	0	0	0	0	0	0
1229	STM1268		putative cytoplasmic protein	-0.09436	4.06309	-0.54534	2.25635	3.15972	-0.04559	3.69274	0	0.302	0	0	0	0	0	0	0	0
1024	STM1055	gtgE		-0.09464	4.06165	-0.5517	2.20106	3.13136	-0.06541	3.60766	1	0.345	0	0	0	0	0	0	0	0
1652	STM1698A		putative protein	-0.11499	3.95762	-0.57188	2.02565	2.99163	-0.09123	3.49682	0	0.302	0	0	0	0	0	0	0	0
2265	STM2329		putative cytoplasmic protein	-0.13184	3.87148	-0.5553	2.16977	3.02063	-0.07904	3.54915	0	0.382	0	0	0	0	0	0	0	0
2549	STM2622		Gifsy-1 prophage	-0.13259	3.86765	-0.56077	2.12222	2.99493	-0.07982	3.5458	0	0.352	0	0	0	0	0	0	0	0
942	STM0972	sopD-2	homologous to secreted protein sopD	-0.14236	3.8177	-0.5977	1.80121	2.80945	-0.13023	3.32941	1	0.334	0	0.132	1	1	0	0	0	2
1290	STM1329		putative inner membrane protein	-0.15215	3.76765	-0.62756	1.54165	2.65465	-0.17381	3.14233	0	0.309	0	0.163	0	0	0	0	0	0
2672	STM2761		putative inner membrane protein	-0.15386	3.75891	-0.54005	2.30233	3.03062	-0.08437	3.52627	0	0.329	0	0	0	0	0	0	1	1
706	STM0726		putative glycosyl transferase	-0.16368	3.70871	-0.52382	2.44341	3.07606	-0.07965	3.54653	0	0.358	0	0	0	0	0	0	0	0
287	STM0294		putative cytoplasmic protein	-0.16579	3.69792	-0.63478	1.47889	2.58841	-0.16461	3.18182	0	0.32	0	0	0	0	0	0	0	0
286	STM0293		putative cytoplasmic protein	-0.17054	3.67364	-0.67754	1.1072	2.39042	-0.21706	2.95667	0	0.298	0	0.169	0	0	0	0	0	0
705	STM0725		putative glycosyltransferase, cell wall biogenesis	-0.17146	3.66894	-0.68538	1.03905	2.35399	-0.22935	2.90391	0	0.317	0.105	0.105	0	0	0	0	0	0
4116	STM4276		putative cytoplasmic protein	-0.17382	3.65687	-0.63193	1.50366	2.58027	-0.20019	3.02909	0	0.308	0	0	0	0	0	0	0	0
2026	STM2087	rfbV	LPS side chain defect: abequosyltransferase	-0.18895	3.57952	-0.60915	1.70168	2.6406	-0.16918	3.1622	0	0.323	0	0	1	0	0	0	0	1
2658	STM2747		putative cytoplasmic protein	-0.18968	3.57579	-0.62369	1.57529	2.57554	-0.18079	3.11237	0	0.312	0	0	0	0	0	0	0	0
4097	STM4257		putative inner membrane or exported	-0.19066	3.57078	-0.63283	1.49584	2.53331	-0.21295	2.97431	0	0.347	0	0.143	0	1	0	0	0	1
704	STM0724		putative glycosyltransferase, cell wall biogenesis	-0.19739	3.53638	-0.63833	1.44803	2.4922	-0.214	2.96981	0	0.325	0	0	0	0	0	0	0	0
3999	STM4155		putative inner membrane protein	-0.19949	3.52564	-0.65487	1.30426	2.41495	-0.23315	2.8876	0	0.313	0	0.112	1	0	0	0	0	1
3601	STM3720	yibR	putative inner membrane protein	-0.20076	3.51915	-0.62285	1.58259	2.55087	-0.19755	3.04042	0	0.309	0	0	0	0	0	0	0	0
288	STM0295		putative cytoplasmic protein	-0.21044	3.46966	-0.63251	1.49862	2.48414	-0.22797	2.90984	0	0.321	0	0	0	0	0	0	0	0
3720	STM3845		putative inner membrane protein	-0.21184	3.46251	-0.65981	1.26132	2.36191	-0.25107	2.81068	0	0.32	0	0	0	0	0	0	0	0
1021	STM1051	sseI (srfH, gtgB)	Secretion system effector, encoded in Gifsy-2 phage	-0.21265	3.45836	-0.59623	1.81399	2.63618	-0.17015	3.15804	1	0.411	0	0.093	1	0	0	0	0	1
1204	STM1239		putative cytoplasmic protein	-0.21542	3.4442	-0.55826	2.14404	2.79412	-0.15876	3.20693	0	0.386	0	0.152	0	0	0	0	0	0
1293	STM1332	rfc	O-antigen polymerase	-0.21768	3.43265	-0.57207	2.024	2.72832	-0.1753	3.13593	0	0.335	0	0.096	0	0	0	0	0	0
4306	STM4472	ytgA	putative inner membrane protein	-0.22721	3.38393	-0.54951	2.2201	2.80202	-0.15533	3.22166	0	0.383	0	0	0	0	0	0	0	0
4355	STM4522		putative inner membrane protein	-0.22732	3.38337	-0.59447	1.82928	2.60633	-0.21438	2.96817	0	0.298	0	0.06	0	0	0	0	0	0
2514	STM2585A		Gifsy-1 prophage: similar to transpose	-0.22938	3.37284	-0.59401	1.83328	2.60306	-0.2055	3.00629	0	0.357	0	0	0	1	0	0	0	1
2076	STM2138		putative cytoplasmic protein	-0.2352	3.34308	-0.55951	2.13317	2.73813	-0.16634	3.1744	0	0.325	0	0.138	0	1	0	0	0	1
2027	STM2088	rfbX	LPS side chain defect: putative O-antigen transferase	-0.23919	3.32269	-0.6343	1.48306	2.40287	-0.2425	2.84746	0	0.31	0	0	1	0	1	0	0	2
4037	STM4197		putative inner membrane protein	-0.24132	3.3118	-0.59714	1.80608	2.55894	-0.20672	3.00106	0	0.341	0	0	0	0	0	0	0	0
2678	STM2767		putative Superfamily I DNA and RNA helicase	-0.24132	3.3118	-0.60504	1.7374	2.5246	-0.21385	2.97045	0	0.342	0	0	0	0	0	0	0	0
3803	STM3941		putative inner membrane protein	-0.24288	3.30382	-0.58606	1.90239	2.60311	-0.2111	2.98225	0	0.363	0	0.094	0	0	0	0	0	0
1537	STM1583	steA	putative cytoplasmic protein	-0.24525	3.29171	-0.58167	1.94055	2.61613	-0.21239	2.97672	1	0.429	0	0	1	1	0	0	0	2
4468	PSLT075	traJ	conjugative transfer: regulation	-0.25063	3.2642	-0.61469	1.65352	2.45886	-0.23031	2.89979	0	0.35	0	0.101	0	0	0	0	0	0
325	STM0335		putative outer membrane protein	-0.25174	3.25853	-0.5357	2.34014	2.79934	-0.17632	3.13155	0	0.357	0	0	0	0	0	0	0	0
2677	STM2766		putative cytoplasmic protein	-0.25637	3.23486	-0.61521	1.649	2.44193	-0.24161	2.85128	0	0.35	0	0	0	0	0	0	0	0
1056	STM1088	pipB-1	Pathogenicity island encoded protein: SPI5	-0.25706	3.23133	-0.56897	2.05094	2.64114	-0.16858	3.16478	1	0.393	0.117	0.162	0	0	0	0	1	1
338	STM0348		putative inner membrane protein	-0.25984	3.21712	-0.64933	1.35241	2.28477	-0.27822	2.69413	0	0.353	0	0.257	0	0	0	0	0	0
2175	STM2238		putative phage protein	-0.2658	3.18665	-0.67346	1.14266	2.16466	-0.29647	2.61579	0	0.335	0	0	0	0	0	0	0	0
3597	STM3716	rfaY	lipopolysaccharide core biosynthesis; modification of heptose region of the core	-0.26973	3.16656	-0.67651	1.11615	2.14136	-0.29659	2.61527	0	0.335	0.698	0.147	0	0	0	0	0	0
331	STM0341		putative inner membrane protein	-0.27044	3.16293	-0.61706	1.63292	2.39793	-0.24427	2.83987	0	0.361	0.146	0.087	0	0	0	0	0	0
267	STM0274A		putative protein	-0.27156	3.15721	-0.4726	2.88864	3.02292	-0.11293	3.40367	0	0.418	0	0	0	0	0	0	0	0
1226	STM1265		putative response regulators consisting of a CheY-like receiver domain and a HTH DNA-binding domain	-0.27161	3.15695	-0.63166	1.50601	2.33148	-0.27923	2.68979	0	0.361	0.091	0.122	0	0	0	0	0	0
2657	STM2746		putative Excinuclease ATPase subunit	-0.27743	3.1272	-0.62676	1.5486	2.3379	-0.25682	2.78599	0	0.279	0.108	0.115	0	0	0	0	0	0
1585	STM1631	sseJ	Salmonella translocated effector: regulated by SPI-2	-0.28072	3.11038	-0.59949	1.78565	2.44801	-0.22732	2.91263	1	0.392	0	0	1	0	0	0	0	1
1817	STM1867	pagK	PhoPQ-activated gene	-0.28179	3.10491	-0.58717	1.89274	2.49882	-0.23474	2.88078	0	0.375	0	0	0	1	0	0	0	1
2681	STM2770	fljA	Flagellar synthesis: repressor of fliC	-0.28512	3.08788	-0.6639	1.22576	2.15682	-0.30681	2.5714	0	0.41	0	0.196	1	1	0	0	0	2
1377	STM1417	ssaP	Secretion system apparatus	-0.28523	3.08732	-0.47277	2.88716	2.98724	-0.12573	3.34872	0	0.447	0	0	0	1	0	1	0	2
2850	STM2945	sopD-1	secreted protein in the Sop family; transferred to eukaryotic cells	-0.28531	3.08691	-0.6589	1.26923	2.17807	-0.2937	2.62768	1	0.407	0	0.11	1	0	0	0	0	1
277	STM0284		putative shiga-like toxin A subunit	-0.28879	3.06912	-0.5888	1.87857	2.47385	-0.2423	2.84832	0	0.341	0	0.168	0	1	0	0	0	1
1556	STM1602	sifB	Salmonella translocated effector: translocated by SPI-2	-0.29093	3.05818	-0.57797	1.97271	2.51545	-0.22365	2.92838	1	0.379	0	0	0	0	0	0	1	1
3053	STM3155		putative cytoplasmic protein	-0.29289	3.04816	-0.54146	2.29007	2.66912	-0.20467	3.00986	0	0.427	0	0.125	0	0	0	0	0	0
4001	STM4157	sseK-1	putative cytoplasmic protein	-0.293	3.0476	-0.62945	1.52522	2.28641	-0.29762	2.61085	1	0.338	0	0	0	0	0	0	1	1
1892	STM1941		putative inner membrane protein	-0.2935	3.04504	-0.62952	1.52461	2.28483	-0.28637	2.65914	0	0.37	0	0	0	0	0	0	0	0
1508	STM1554		putative coiled-coil protein	-0.29393	3.04285	-0.55352	2.18524	2.61404	-0.22624	2.91726	0	0.36	0	0.094	1	0	0	0	0	1
876	STM0904		Fels-1 prophage	-0.29548	3.03492	-0.6043	1.74384	2.38938	-0.2633	2.75818	0	0.37	0	0.1	0	0	0	0	0	0
2075	STM2137	sseK-2	putative cytoplasmic protein	-0.30026	3.01049	-0.57535	1.99549	2.50299	-0.25364	2.79964	1	0.372	0	0	1	1	0	0	0	2
2462	STM2534		putative cytoplasmic protein	-0.30189	3.00215	-0.54818	2.23166	2.61691	-0.22043	2.9422	0	0.448	0	0	0	0	0	0	0	0
4435	PSLT005	tap	replication of plasmid	-0.30805	2.97066	-0.64647	1.37727	2.17397	-0.3222	2.50534	0	0.416	0	0	0	0	0	0	0	0
1189	STM1224	sifA	lysosomal glycoprotein (lgp)-containing structures; replication in macrophages	-0.30895	2.96606	-0.58578	1.90482	2.43544	-0.24673	2.82931	1	0.412	0	0	0	1	0	0	0	1
270	STM0277		putative cytoplasmic protein	-0.31079	2.95665	-0.56277	2.10484	2.53075	-0.24533	2.83532	0	0.412	0	0.075	0	0	0	0	0	0
2147	STM2208		putative inner membrane protein	-0.31212	2.94985	-0.59619	1.81433	2.38209	-0.27832	2.6937	0	0.385	0.195	0.136	1	0	0	0	0	1
1736	STM1785		putative cytoplasmic protein	-0.31288	2.94597	-0.5928	1.8438	2.39489	-0.2865	2.65859	0	0.387	0	0	0	0	0	0	0	0
100	STM0100		putative cytoplasmic protein	-0.31332	2.94372	-0.54922	2.22262	2.58317	-0.23318	2.88747	0	0.425	0	0	1	0	0	0	0	1
4079	STM4239		putative cytoplasmic protein	-0.31406	2.93994	-0.5243	2.43924	2.68959	-0.20976	2.98801	0	0.407	0	0	0	0	0	0	0	0
3052	STM3154		putative ATP-dependent RNA helicase-like protein	-0.31494	2.93544	-0.57938	1.96045	2.44795	-0.25537	2.79222	0	0.431	0	0	0	0	0	0	0	0
4142	STM4302		putative cytoplasmic protein	-0.31991	2.91003	-0.57699	1.98123	2.44563	-0.26949	2.7316	0	0.398	0	0	0	0	0	0	1	1
541	STM0551		putative Diguanylate cyclase/phosphodiesterase domain 0	-0.32073	2.90584	-0.61105	1.68516	2.2955	-0.29418	2.62562	0	0.424	0.136	0.223	0	0	0	0	0	0
980	STM1010		Gifsy-2 prophage	-0.32115	2.90369	-0.60116	1.77113	2.33741	-0.28843	2.6503	0	0.381	0	0	0	0	0	0	0	0
4467	PSLT073	traM	conjugative transfer: mating signal	-0.32492	2.88442	-0.58266	1.93194	2.40818	-0.27368	2.71362	0	0.361	0	0.23	0	0	0	0	0	0
2784	STM2879	sicP	chaparone, related to virulence	-0.32777	2.86985	-0.65454	1.30713	2.08849	-0.3307	2.46885	0	0.393	0	0	0	0	0	0	0	0
2512	STM2584	gogB	Gifsy-1 prophage: leucine-rich repeat protein	-0.32905	2.86331	-0.61977	1.60936	2.23633	-0.31911	2.5186	1	0.33	0.058	0.141	0	0	0	0	0	0
782	STM0809		putative inner membrane protein	-0.33096	2.85354	-0.56525	2.08328	2.46841	-0.26929	2.73246	0	0.411	0	0	0	0	0	0	0	0
4153	STM4314		putative bacterial regulatory proteins, luxR family	-0.33104	2.85313	-0.74136	0.552444	1.70279	-0.39739	2.18257	0	0.3	0.211	0.158	0	0	0	0	0	0
4155	STM4316		putative cytoplasmic protein	-0.33344	2.84086	-0.58711	1.89326	2.36706	-0.28894	2.64811	0	0.398	0	0	0	0	0	0	1	1
1819	STM1868A		putative protein	-0.33583	2.82864	-0.62268	1.58407	2.20636	-0.31582	2.53272	0	0.377	0	0	0	1	0	0	0	1
3815	STM3954	yigG	putative inner membrane protein	-0.34328	2.79056	-0.64232	1.41335	2.10195	-0.35275	2.37419	0	0.365	0.493	0	1	0	0	0	0	1
4036	STM4196		putative cytoplasmic protein	-0.34521	2.78069	-0.61662	1.63675	2.20872	-0.3123	2.54783	0	0.385	0	0	0	0	0	0	0	0
2772	STM2867	hilC	bacterial regulatory helix-turn-helix proteins, araC family	-0.34559	2.77875	-0.6957	0.949343	1.86405	-0.36366	2.32736	0	0.371	0.153	0	1	1	0	0	0	2
4353	STM4520		putative cytoplasmic protein	-0.34701	2.77149	-0.47761	2.84509	2.80829	-0.19046	3.07086	0	0.462	0	0	0	0	0	0	0	0
332	STM0342		putative periplasmic protein	-0.35149	2.74859	-0.64368	1.40153	2.07506	-0.34882	2.39106	0	0.398	0	0	0	0	0	0	0	0
1621	STM1668		putative outer membrane or exported	-0.35169	2.74757	-0.52354	2.44584	2.5967	-0.25115	2.81033	0	0.406	0	0.163	0	0	0	0	1	1
335	STM0345		putative inner membrane protein	-0.35343	2.73867	-0.6357	1.47089	2.10478	-0.34236	2.41879	0	0.391	0	0.16	0	0	0	0	0	0
3594	STM3713	rfaL	O-antigen ligase	-0.35503	2.73049	-0.64989	1.34755	2.03902	-0.35607	2.35994	0	0.393	0	0	0	0	0	0	0	0
3804	STM3942		putative cytoplasmic protein	-0.35535	2.72885	-0.58508	1.91091	2.31988	-0.30282	2.58853	0	0.431	0	0	0	0	0	0	0	0
2781	STM2876	hilA	invasion genes transcription activator	-0.35648	2.72308	-0.63436	1.48254	2.10281	-0.32546	2.49134	0	0.432	0.213	0.099	1	1	0	0	1	3
4000	STM4156		putative cytoplasmic protein	-0.35729	2.71894	-0.66614	1.20629	1.96262	-0.3697	2.30143	0	0.343	0	0.149	1	0	0	0	0	1
292	STM0299	safA	putative outer membrane protein	-0.35933	2.70851	-0.61686	1.63466	2.17158	-0.32092	2.51083	0	0.43	0	0	0	0	0	0	0	0
3990	STM4141		putative cytoplasmic protein	-0.35943	2.708	-0.66523	1.2142	1.9611	-0.37167	2.29298	0	0.416	0.386	0	0	0	0	0	0	0
276	STM0283		putative inner membrane protein	-0.36295	2.69	-0.52312	2.44949	2.56975	-0.25555	2.79144	0	0.418	0	0	0	0	0	0	0	0
1780	STM1829		putative cytoplasmic protein	-0.36358	2.68678	-0.64072	1.42726	2.05702	-0.36095	2.33899	0	0.421	0	0	0	0	0	0	0	0
2543	STM2614	gogA	Gifsy 1 encoded effector	-0.36563	2.6763	-0.65624	1.29235	1.98433	-0.35881	2.34818	1	0.427	0	0.118	1	0	0	0	0	1
1205	STM1240	envF	putative envelope lipoprotein	-0.36732	2.66766	-0.54702	2.24174	2.4547	-0.29414	2.62579	0	0.396	0	0.088	0	1	0	0	0	1
545	STM0557		putative inner membrane protein	-0.36772	2.66562	-0.64919	1.35363	2.00962	-0.37815	2.26516	0	0.368	0	0	0	0	0	0	1	1
2770	STM2865	avrA	putative inner membrane protein	-0.36948	2.65662	-0.58789	1.88648	2.27155	-0.30235	2.59055	1	0.423	0	0.123	0	0	0	0	0	0
429	STM0438		putative TPR repeat protein	-0.37074	2.65018	-0.65664	1.28887	1.96953	-0.36614	2.31671	0	0.396	0.136	0.155	1	0	0	0	1	2
1807	STM1856		putative cytoplasmic protein	-0.3732	2.6376	-0.67351	1.14223	1.88992	-0.39311	2.20094	0	0.349	0.397	0.122	0	0	0	0	0	0
1371	STM1411	ssaK	Secretion system apparatus	-0.37372	2.63494	-0.65217	1.32773	1.98134	-0.38105	2.25271	0	0.427	0	0.161	0	1	1	0	1	3
2927	STM3026		putative outer membrane protein	-0.37376	2.63474	-0.61061	1.68899	2.16186	-0.34943	2.38845	0	0.401	0	0	0	0	0	0	1	1
2163	STM2225		putative inner membrane protein	-0.37384	2.63433	-0.5826	1.93246	2.2834	-0.31895	2.51929	0	0.437	0	0	0	1	0	0	0	1
2789	STM2884	sipC	cell invasion protein	-0.376	2.62329	-0.55149	2.20289	2.41309	-0.27963	2.68808	1	0.478	0.086	0.154	0	0	0	0	1	1
1584	STM1630		putative inner membrane protein	-0.37764	2.6149	-0.62768	1.54061	2.07776	-0.34978	2.38694	0	0.366	0.038	0.197	0	0	0	0	1	1
1078	STM1110		putative cytoplasmic protein	-0.37931	2.60637	-0.64859	1.35885	1.98261	-0.38597	2.23159	0	0.378	0.367	0.225	0	0	0	0	0	0
2552	STM2631		Gifsy-1 prophage	-0.38118	2.59681	-0.63628	1.46585	2.03133	-0.38	2.25722	0	0.391	0	0	0	0	0	0	0	0
2051	STM2112	wcaD	putative colanic acid polymerase	-0.38121	2.59665	-0.58784	1.88692	2.24178	-0.33714	2.4412	0	0.433	0.938	0	0	0	0	0	0	0
4098	STM4258		putative methyl-accepting chemotaxis protein	-0.38146	2.59538	-0.61952	1.61154	2.10346	-0.36028	2.34187	0	0.368	0	0.182	0	0	0	0	0	0
4469	PSLT076	traY	conjugative transfer: oriT nicking	-0.3827	2.58904	-0.62908	1.52844	2.05874	-0.36749	2.31092	0	0.388	0	0	1	0	0	0	0	1
2513	STM2585		Gifsy-1 prophage: similar to transpose	-0.38281	2.58847	-0.61344	1.66439	2.12643	-0.35106	2.38145	0	0.4	0	0.215	1	0	0	0	0	1
2813	STM2908		putative cytoplasmic protein	-0.3841	2.58188	-0.64153	1.42022	2.00105	-0.35158	2.37922	0	0.436	0	0	0	0	0	0	0	0
487	STM0497		putative periplasmic protein	-0.38513	2.57661	-0.58295	1.92942	2.25302	-0.33514	2.44979	0	0.432	0	0	0	0	0	0	0	0
4154	STM4315		putative AraC-type DNA-binding domain-containing protein	-0.38601	2.57211	-0.65265	1.32356	1.94784	-0.36301	2.33015	0	0.354	0.254	0.131	0	1	0	0	0	1
1341	STM1381	orf245	putative cytoplasmic protein	-0.3861	2.57165	-0.56363	2.09736	2.33451	-0.28142	2.68039	0	0.422	0	0.106	1	1	0	0	0	2
2148	STM2209		putative inner membrane protein	-0.38612	2.57155	-0.61407	1.65891	2.11523	-0.3697	2.30143	0	0.377	0	0	1	1	0	0	0	2
4291	STM4457		putative transposase	-0.3869	2.56757	-0.6417	1.41874	1.99315	-0.3755	2.27653	0	0.451	0.088	0.128	0	0	0	0	0	0
1055	STM1087	pipA	Pathogenicity island encoded protein: SPI3	-0.38853	2.55923	-0.56535	2.08241	2.32082	-0.2993	2.60364	0	0.44	0	0.093	0	0	0	0	0	0
1364	STM1404	sseF	Secretion system effector	-0.38915	2.55606	-0.50519	2.60535	2.58071	-0.26895	2.73392	1	0.491	0	0	0	1	0	1	0	2
1848	STM1896		putative cytoplasmic protein	-0.38954	2.55407	-0.58921	1.87501	2.21454	-0.33935	2.43172	0	0.446	0	0.097	1	1	0	0	0	2
2124	STM2185	b2145	putative inner membrane protein	-0.38961	2.55371	-0.6557	1.29704	1.92538	-0.40569	2.14694	0	0.408	0.58	0.21	0	0	0	0	0	0
31	STM0031		putative transcription regulator	-0.39153	2.5439	-0.71246	0.803657	1.67378	-0.42314	2.07203	0	0.359	0.137	0.068	0	0	0	0	0	0
2653	STM2742		putative cytoplasmic protein	-0.39159	2.54359	-0.60136	1.76939	2.15649	-0.33516	2.4497	0	0.417	0.035	0	0	0	0	0	0	0
1814	STM1863		putative inner membrane protein	-0.39287	2.53705	-0.68165	1.07147	1.80426	-0.42795	2.05138	0	0.405	0	0	0	0	0	0	0	0
3596	STM3715	rfaZ	lipopolysaccharide core biosynthesis	-0.39409	2.53081	-0.59906	1.78939	2.1601	-0.332	2.46327	0	0.378	0.684	0	1	0	0	0	0	1
337	STM0347		putative response regulator	-0.39409	2.53081	-0.64791	1.36476	1.94778	-0.37284	2.28795	0	0.398	0.122	0.052	0	0	0	0	0	0
1209	STM1244	pagD	PhoP regulated	-0.39569	2.52263	-0.61073	1.68794	2.10529	-0.36099	2.33882	0	0.418	0	0.172	0	1	0	0	0	1
3058	STM3160		putative inner membrane protein	-0.39581	2.52202	-0.62684	1.54791	2.03496	-0.38565	2.23296	0	0.383	0.816	0	0	0	0	0	0	0
4517	PSLT038	spvC	Salmonella plasmid virulence: hydrophilic protein	-0.39718	2.51501	-0.54806	2.2327	2.37386	-0.28276	2.67464	0	0.455	0	0.104	1	0	0	0	0	1
2806	STM2901		putative cytoplasmic protein	-0.39969	2.50218	-0.70382	0.87876	1.69047	-0.43729	2.01129	0	0.43	0	0.121	0	0	0	0	0	0
1806	STM1855	sopE-2	TypeIII-secreted protein effector: invasion-associated protein	-0.40231	2.48879	-0.58957	1.87188	2.18033	-0.31739	2.52598	1	0.418	0	0	1	0	0	0	1	2
1193	STM1228		putative periplasmic protein	-0.40324	2.48403	-0.5475	2.23757	2.3608	-0.30944	2.56011	0	0.476	0.056	0.133	0	0	0	0	1	1
1228	STM1267		putative cytoplasmic protein	-0.40411	2.47958	-0.60933	1.70011	2.08985	-0.36267	2.33161	0	0.383	0.341	0.207	0	0	0	0	0	0
4336	STM4503		putative inner membrane protein	-0.40427	2.47877	-0.67576	1.12267	1.80072	-0.4163	2.10139	0	0.389	0.118	0.102	1	0	0	0	0	1
1212	STM1250		putative cytoplasmic protein	-0.40465	2.47682	-0.58322	1.92708	2.20195	-0.34076	2.42566	0	0.445	0	0	0	0	0	0	0	0
4205	STM4370	yjfI	putative cytoplasmic protein	-0.40561	2.47192	-0.70001	0.911879	1.6919	-0.43157	2.03584	0	0.401	0.634	0.119	0	0	0	0	0	0
811	STM0839		putative inner membrane protein	-0.41014	2.44876	-0.63792	1.4516	1.95018	-0.39049	2.21219	0	0.436	0.069	0	1	0	0	0	0	1
1357	STM1397	sseA	Secretion system effector	-0.41135	2.44257	-0.66817	1.18865	1.81561	-0.43138	2.03666	0	0.408	0	0.222	1	1	1	0	1	4
1023	STM1054		Gifsy-2 prophage	-0.41233	2.43756	-0.65171	1.33173	1.88464	-0.40922	2.13178	0	0.425	0	0	0	0	0	0	0	0
2802	STM2897	invE	invasion protein	-0.4129	2.43465	-0.48363	2.79276	2.6137	-0.23208	2.89219	0	0.454	0.094	0.194	1	1	0	0	1	3
4044	STM4204		putative inner membrane protein	-0.41322	2.43301	-0.63766	1.45386	1.94343	-0.39437	2.19553	0	0.42	0	0	1	0	0	0	0	1
2636	STM2724		Fels-2 prophage: hypothetical protein	-0.4136	2.43107	-0.68077	1.07912	1.7551	-0.42695	2.05568	0	0.366	0	0	0	0	0	0	0	0
2182	STM2245		putative outer membrane protein	-0.41525	2.42263	-0.58664	1.89735	2.15999	-0.3645	2.32375	0	0.396	0	0.166	1	1	0	0	1	3
2494	STM2566		putative periplasmic protein	-0.41604	2.4186	-0.61301	1.66813	2.04336	-0.38956	2.21618	0	0.464	0	0	0	0	0	0	0	0
2403	STM2475		putative cytoplasmic protein	-0.41611	2.41824	-0.54042	2.29911	2.35868	-0.31271	2.54607	0	0.47	0	0.289	0	0	0	0	0	0
1789	STM1838	yobF	putative cytoplasmic protein	-0.41627	2.41742	-0.55589	2.16464	2.29103	-0.31935	2.51757	0	0.406	0.936	0	0	0	0	0	0	0
2783	STM2878	sptP	protein tyrosine phosphate	-0.41656	2.41594	-0.6059	1.72993	2.07293	-0.36524	2.32058	1	0.441	0	0.145	0	0	0	0	0	0
4493	PSLT102	traS	conjugative transfer: surface exclusion	-0.41707	2.41333	-0.56839	2.05598	2.23466	-0.34631	2.40184	0	0.387	0	0	0	0	0	0	0	0
271	STM0278		putative periplasmic protein	-0.41906	2.40316	-0.68105	1.07669	1.73992	-0.42585	2.0604	0	0.376	0	0	0	0	0	0	0	0
3571	STM3690		putative inner membrane lipoprotein	-0.42023	2.39718	-0.64765	1.36702	1.8821	-0.41457	2.10882	0	0.379	0	0.101	1	0	0	0	0	1
15	STM0015		putative bacteriophage protein	-0.4203	2.39682	-0.68426	1.04879	1.7228	-0.43374	2.02653	0	0.407	0	0.105	0	0	0	0	0	0
1358	STM1398	sseB	Secretion system effector	-0.42382	2.37882	-0.56785	2.06068	2.21975	-0.34405	2.41154	1	0.434	0	0.163	1	0	0	0	0	1
1216	STM1254		putative outer membrane lipoprotein	-0.42441	2.37581	-0.63352	1.48984	1.93282	-0.38692	2.22751	0	0.417	0	0	0	0	0	0	0	0
2005	STM2066	sopA	Secreted effector protein of Salmonella dublin	-0.42568	2.36931	-0.51422	2.52686	2.44809	-0.2909	2.6397	1	0.474	0.12	0	0	0	0	0	0	0
334	STM0344		putative response regulator	-0.42579	2.36875	-0.61579	1.64396	2.00636	-0.37739	2.26842	0	0.409	0.126	0	0	0	0	0	0	0
4225	STM4390		putative cytoplasmic protein	-0.42693	2.36292	-0.47544	2.86395	2.61344	-0.26736	2.74075	0	0.466	0	0	0	0	0	0	0	0
1824	STM1872		putative cytoplasmic protein	-0.42712	2.36195	-0.60097	1.77278	2.06737	-0.37935	2.26001	0	0.429	0	0	0	0	0	0	0	0
996	STM1026	gtgA	Gifsy 2 encoded effector	-0.43135	2.34033	-0.62072	1.60111	1.97072	-0.38451	2.23786	1	0.436	0	0.153	1	1	0	1	0	3
3632	STM3752		putative cytoplasmic protein	-0.43146	2.33977	-0.61451	1.65509	1.99743	-0.40597	2.14574	0	0.395	0	0	0	0	0	0	0	0
1323	STM1362	ydiL	putative cytoplasmic protein	-0.43234	2.33527	-0.68376	1.05313	1.6942	-0.45128	1.95123	0	0.421	0.588	0	0	0	0	0	0	0
2788	STM2883	sipD	cell invasion protein	-0.43283	2.33276	-0.49442	2.69897	2.51587	-0.30072	2.59754	1	0.473	0	0.149	1	1	0	1	1	4
4476	PSLT083	trbD	conjugative transfer:	-0.43327	2.33051	-0.64391	1.39953	1.86502	-0.41298	2.11564	0	0.384	0	0.272	0	0	0	0	0	0
1555	STM1601	ugtL	putative membrane protein: homology with chitinase from Schizosaccharomyces	-0.43548	2.31921	-0.64399	1.39883	1.85902	-0.43193	2.0343	0	0.405	0	0.114	0	0	0	0	0	0
511	STM0521	ybbV	putative cytoplasmic protein	-0.43554	2.31891	-0.6561	1.29357	1.80624	-0.43084	2.03898	0	0.409	0.333	0.155	0	0	0	0	0	0
2644	STM2733		Fels-2 prophage: similar to E. coli retron Ec67	-0.43711	2.31088	-0.63985	1.43482	1.87285	-0.41688	2.0989	0	0.446	0	0	0	0	0	0	0	0
2805	STM2900	invH	invasion protein	-0.43812	2.30572	-0.63029	1.51792	1.91182	-0.41945	2.08787	0	0.422	0	0.197	0	0	0	0	1	1
4337	STM4504		putative cytoplasmic protein	-0.43938	2.29928	-0.6645	1.22055	1.75991	-0.44667	1.97102	0	0.366	0	0.092	0	1	1	0	0	2
1356	STM1396	ssaE	Secretion system effector	-0.4427	2.2823	-0.61745	1.62953	1.95592	-0.41179	2.12075	0	0.426	0	0.25	1	1	1	0	0	3
2646	STM2735		Fels-2 prophage: hypothetical protein	-0.44312	2.28016	-0.63408	1.48497	1.88257	-0.41934	2.08834	0	0.476	0	0	0	0	0	0	0	0
1367	STM1407	ssaH	Secretion system apparatus	-0.44445	2.27336	-0.62642	1.55156	1.91246	-0.40686	2.14192	0	0.441	0	0	0	0	0	0	0	0
2594	STM2680		putative cytoplasmic protein	-0.44479	2.27162	-0.6433	1.40483	1.83823	-0.43343	2.02786	0	0.438	0.104	0.189	1	0	0	0	0	1
3430	STM3548		putative cytoplasmic protein	-0.44636	2.26359	-0.66943	1.1777	1.72064	-0.43614	2.01623	0	0.432	0.091	0.091	1	0	0	0	0	1
2615	STM2703		Fels-2 prophage: similar to invertase (pin) in phage E14	-0.44754	2.25756	-0.6011	1.77165	2.01461	-0.38813	2.22232	0	0.457	0.042	0	0	0	0	0	0	0
529	STM0539		putative inner membrane protein	-0.44891	2.25056	-0.56898	2.05086	2.15071	-0.37341	2.28551	0	0.492	0	0.124	0	0	0	0	0	0
2223	STM2287		putative cytoplasmic protein	-0.44912	2.24948	-0.68942	1.00393	1.62671	-0.48022	1.827	0	0.387	0.312	0	0	0	0	0	0	0
2170	STM2233		putative cytoplasmic protein	-0.45084	2.24069	-0.66572	1.20994	1.72532	-0.42599	2.0598	0	0.451	0.456	0.136	1	1	0	0	0	2
542	STM0552	fimW	putative fimbrial protein	-0.45088	2.24049	-0.67948	1.09034	1.66541	-0.45453	1.93728	0	0.421	0.217	0	1	1	0	0	0	2
1372	STM1412	ssaL	Secretion system apparatus	-0.45296	2.22985	-0.5979	1.79947	2.01466	-0.38828	2.22167	0	0.457	0	0.124	1	1	0	0	1	3
1483	STM1528		putative outer membrane protein	-0.45314	2.22893	-0.52614	2.42324	2.32609	-0.33542	2.44859	0	0.491	0	0.211	0	0	0	0	0	0
1890	STM1939		putative glucose-6-phosphate dehydrogenase	-0.45348	2.2272	-0.61325	1.66604	1.94662	-0.38914	2.21798	0	0.42	0	0	1	1	0	0	0	2
2951	STM3052		putative outer membrane protein	-0.45368	2.22617	-0.53199	2.37239	2.29928	-0.33453	2.45241	0	0.434	0	0.067	1	0	0	0	0	1
1353	STM1393	ssaB (spiC)	Secretion system apparatus	-0.45521	2.21835	-0.55857	2.14135	2.17985	-0.34168	2.42171	1	0.414	0	0	1	1	1	0	1	4
4439	PSLT024		hypothetical protein	-0.45594	2.21462	-0.4204	3.34239	2.7785	-0.22511	2.92211	0	0.484	0	0	0	0	0	0	0	0
1098	STM1131		putative outer membrane protein	-0.45665	2.21099	-0.7204	0.734639	1.47281	-0.48076	1.82469	0	0.361	0.274	0.178	1	1	0	0	0	2
900	STM0928	nanH	sialidase (neuraminidase)	-0.45799	2.20414	-0.6234	1.57781	1.89097	-0.39545	2.1909	0	0.405	0	0.167	0	0	0	0	0	0
349	STM0359		putative cytoplasmic protein	-0.45868	2.20061	-0.50632	2.59553	2.39807	-0.32006	2.51452	0	0.505	0	0	0	0	0	0	0	0
2639	STM2728		Fels-2 prophage: hypothetical protein	-0.459	2.19898	-0.5647	2.08806	2.14352	-0.35734	2.35449	0	0.447	0	0	0	0	0	0	0	0
941	STM0971		putative cytoplasmic protein	-0.45954	2.19622	-0.61352	1.66369	1.92995	-0.41537	2.10538	0	0.448	0	0	0	0	0	0	0	0
2771	STM2866	sprB	transcriptional regulator	-0.45981	2.19484	-0.55526	2.17012	2.18248	-0.35662	2.35758	0	0.454	0.056	0.084	0	0	0	0	0	0
3279	STM3387	yhdU	putative periplasmic protein	-0.46101	2.1887	-0.66676	1.2009	1.6948	-0.48472	1.80769	0	0.415	0.833	0	0	0	0	0	0	0
543	STM0554		homology to integrase protein of phage	-0.46108	2.18834	-0.63846	1.4469	1.81762	-0.43136	2.03674	0	0.441	0.565	0	0	0	0	0	0	0
2095	STM2156A		putative protein	-0.46141	2.18666	-0.69332	0.970031	1.57834	-0.48207	1.81906	0	0.406	0.239	0.159	0	1	0	0	0	1
2692	STM2782	mig-14	putative transcription activator	-0.46186	2.18436	-0.59266	1.84502	2.01469	-0.37612	2.27387	0	0.411	0	0	0	0	0	0	1	1
1125	STM1159	yceO	putative inner membrane protein	-0.46188	2.18425	-0.6569	1.28661	1.73543	-0.46901	1.87512	0	0.389	0.649	0	0	0	0	0	0	0
2381	STM2452		putative inner membrane protein	-0.46281	2.1795	-0.57276	2.018	2.09875	-0.39426	2.196	0	0.435	0	0.229	0	0	0	0	0	0
2179	STM2242		putative tail fiber protein of phage	-0.46318	2.17761	-0.61842	1.6211	1.89935	-0.43087	2.03885	0	0.488	0	0	0	0	0	0	0	0
1061	STM1093		putative cytoplasmic protein	-0.46359	2.17551	-0.617	1.63344	1.90448	-0.43165	2.0355	0	0.445	0	0	0	0	0	0	0	0
1060	STM1092	orfX	putative cytoplasmic protein	-0.46434	2.17168	-0.58084	1.94776	2.05972	-0.39322	2.20047	0	0.435	0	0	0	0	0	0	0	0
2436	STM2508		putative cytoplasmic protein	-0.46524	2.16708	-0.72589	0.686917	1.427	-0.50641	1.71458	0	0.386	0	0.183	0	0	0	0	0	0
4170	STM4332	yjeJ	putative inner membrane protein	-0.46565	2.16498	-0.63645	1.46437	1.81468	-0.4435	1.98463	0	0.447	0.582	0.123	1	0	0	0	0	1
925	STM0954		putative inner membrane protein	-0.46588	2.1638	-0.61585	1.64344	1.90362	-0.41624	2.10165	0	0.433	0	0	0	0	0	0	0	0
1373	STM1413	ssaM	Secretion system apparatus	-0.46631	2.16161	-0.65579	1.29626	1.72893	-0.44138	1.99373	0	0.421	0	0	0	1	1	0	1	3
17	STM0017		putative protein	-0.46777	2.15414	-0.73891	0.573741	1.36394	-0.52165	1.64916	0	0.384	0.224	0.109	0	0	0	0	0	0
826	STM0854		putative cytoplasmic protein	-0.46936	2.14601	-0.73205	0.633371	1.38969	-0.50536	1.71908	0	0.388	0.17	0.269	0	0	0	0	0	0
2931	STM3030		putative periplasmic protein	-0.46982	2.14366	-0.61182	1.67847	1.91107	-0.40753	2.13904	0	0.451	0.362	0.095	1	1	0	0	1	3
2094	STM2156	yehR	putative lipoprotein	-0.47021	2.14167	-0.69128	0.987764	1.56472	-0.47517	1.84868	0	0.437	0.73	0.145	0	0	0	0	0	0
2648	STM2737		Fels-2 prophage: similar to protein in phage	-0.47125	2.13635	-0.5707	2.03591	2.08613	-0.37251	2.28937	0	0.452	0	0	0	0	0	0	0	0
1948	STM2007		putative TPR repeat protein	-0.47163	2.13441	-0.60866	1.70594	1.92017	-0.411	2.12414	0	0.436	0.108	0.103	0	1	0	0	0	1
3636	STM3756	rmbA	putative cytoplasmic protein	-0.47173	2.1339	-0.65536	1.3	1.71695	-0.4524	1.94643	0	0.376	0.366	0.117	1	0	0	0	1	2
3487	STM3605		putative phage endolysin	-0.47464	2.11902	-0.51302	2.53729	2.32815	-0.32155	2.50813	0	0.489	0	0	0	0	0	0	0	0
3599	STM3718	rfaI	UDP-D-galactose:(glucosyl)lipopolysaccharide-alpha-1,3-D-galactosyltransferase	-0.4759	2.11258	-0.75243	0.456218	1.2844	-0.52381	1.63988	0	0.374	0.54	0.154	0	0	0	0	0	0
2773	STM2868	orgC		-0.47681	2.10793	-0.53733	2.32597	2.21695	-0.34087	2.42519	1	0.458	0	0.133	1	0	0	0	0	1
783	STM0810		putative inner membrane protein	-0.47718	2.10604	-0.62823	1.53583	1.82093	-0.44408	1.98214	0	0.455	0	0.086	0	1	0	0	0	1
2433	STM2505		putative inner membrane protein	-0.47766	2.10358	-0.52361	2.44523	2.27441	-0.34667	2.40029	0	0.477	0	0	0	0	0	0	0	0
2025	STM2086	rfbU	LPS side chain defect: mannosyl transferase	-0.47822	2.10072	-0.76036	0.387287	1.244	-0.49876	1.74742	0	0.336	0.125	0.178	0	0	0	0	1	1
29	STM0029		putative transcription regulator	-0.47892	2.09714	-0.7169	0.765062	1.4311	-0.50392	1.72527	0	0.372	0.242	0	0	0	0	0	0	0
428	STM0437		putative periplasmic protein	-0.479	2.09673	-0.6496	1.35007	1.7234	-0.43905	2.00373	0	0.437	0.145	0.151	0	0	0	0	0	0
1058	STM1090	pipC	Pathogenicity island encoded protein: homologous to ipgE of Shigella	-0.4807	2.08804	-0.60705	1.71993	1.90399	-0.41382	2.11204	0	0.44	0	0	0	0	0	0	0	0
1809	STM1858		putative cytoplasmic protein	-0.48251	2.07879	-0.60389	1.7474	1.91309	-0.41799	2.09414	0	0.446	0	0	0	0	0	0	0	0
1378	STM1418	ssaQ	Secretion system apparatus	-0.48374	2.0725	-0.62414	1.57138	1.82194	-0.4314	2.03657	0	0.467	0	0.13	1	1	1	0	1	4
317	STM0327		putative cytoplasmic protein	-0.48457	2.06826	-0.61963	1.61058	1.83942	-0.42582	2.06053	0	0.461	0.673	0.168	1	1	0	0	0	2
1111	STM1145	csgC	putative curli production protein	-0.48467	2.06775	-0.62005	1.60693	1.83734	-0.44416	1.9818	0	0.448	0.731	0	1	1	0	0	0	2
2539	STM2610		Gifsy-1 prophage	-0.48473	2.06744	-0.6227	1.5839	1.82567	-0.4548	1.93612	0	0.419	0.805	0.173	0	0	0	0	0	0
44	STM0044	yaaY	putative cytoplasmic protein	-0.48652	2.05829	-0.61961	1.61076	1.83452	-0.44445	1.98055	0	0.479	0.704	0	0	0	0	0	0	0
877	STM0905		Fels-1 prophage	-0.48881	2.04658	-0.65268	1.32329	1.68494	-0.47464	1.85096	0	0.415	0.402	0	0	0	0	0	0	0
2021	STM2082	rfbP	LPS side chain defect: bifunctional enzyme: undecaprenol-phosphate galactosephosphotransferase, and O-antigen transfer	-0.48932	2.04397	-0.73175	0.635979	1.33998	-0.51842	1.66302	0	0.371	0.229	0	1	0	0	0	1	2
699	STM0719		putative UDP-galactopyranose mutase	-0.48989	2.04106	-0.73108	0.641803	1.34143	-0.51732	1.66774	0	0.388	0.371	0.141	0	0	0	0	0	0
4484	PSLT093		conjugative transfer:	-0.49098	2.03549	-0.55888	2.13865	2.08707	-0.39255	2.20334	0	0.438	0	0	0	0	0	0	0	0
2807	STM2902		putative cytoplasmic protein	-0.49119	2.03441	-0.68243	1.06469	1.54955	-0.49771	1.75192	0	0.372	0	0.209	0	0	0	0	0	0
2797	STM2892	invJ	surface presentation of antigens; secretory proteins	-0.49181	2.03124	-0.47161	2.89724	2.46424	-0.30891	2.56239	1	0.485	0	0.161	0	0	0	0	0	0
3841	STM3980		putative outer membrane protein	-0.49223	2.0291	-0.59554	1.81998	1.92454	-0.40622	2.14466	0	0.407	0	0	1	0	0	0	0	1
1518	STM1564	yddX	putative cytoplasmic protein	-0.49469	2.01652	-0.55474	2.17464	2.09558	-0.39747	2.18222	0	0.488	0.887	0.254	1	1	0	0	0	2
3598	STM3717	rfaJ	UDP-D-glucose:(galactosyl)lipopolysaccharide glucosyltransferase	-0.495	2.01494	-0.73548	0.603556	1.30925	-0.5293	1.61632	0	0.347	0.589	0.182	0	0	0	0	0	0
2335	STM2400		putative inner membrane protein	-0.49511	2.01437	-0.60778	1.71359	1.86398	-0.45354	1.94153	0	0.434	0.675	0	1	0	0	0	0	1
4487	PSLT096	trbE	conjugative transfer	-0.4958	2.01085	-0.55692	2.15569	2.08327	-0.38671	2.22841	0	0.484	0	0	0	0	0	0	0	0
2028	STM2089	rfbJ	LPS side chain defect: CDP-abequose synthase	-0.49616	2.00901	-0.85696	-0.452408	0.778299	-0.61154	1.26329	0	0.32	0.224	0.268	0	0	0	0	0	0
4429	STM4599	yjjY	putative inner membrane protein	-0.49661	2.00671	-0.60638	1.72576	1.86623	-0.455	1.93527	0	0.429	0.978	0	0	0	0	0	0	0
1653	STM1699	ycjE	putative cytoplasmic protein	-0.49679	2.00579	-0.53187	2.37343	2.18961	-0.37322	2.28632	0	0.495	0	0	0	0	0	0	0	0
2024	STM2085	rfbN	LPS side chain defect: rhamnosyl transferase	-0.49957	1.99157	-0.78424	0.17971	1.08564	-0.54664	1.54188	0	0.375	0.169	0.194	1	0	0	0	1	2
4426	STM4596		putative inner membrane protein	-0.49972	1.99081	-0.63154	1.50705	1.74893	-0.44606	1.97364	0	0.428	0.247	0	1	1	0	0	0	2
1059	STM1091	sopB (sigD)	Salmonella outer protein: homologous to ipgD of Shigella	-0.5006	1.98631	-0.49855	2.66307	2.32469	-0.33364	2.45623	1	0.471	0	0	0	0	0	0	0	0
2774	STM2869	orgA	putative flagellar biosynthesis/type III secretory pathway protein	-0.5013	1.98273	-0.64359	1.40231	1.69252	-0.47891	1.83263	0	0.451	0	0.15	1	1	1	0	1	4
2544	STM2616		Gifsy-1 prophage: similar to antirepressor protein of phage P22	-0.50281	1.97501	-0.64339	1.40405	1.68953	-0.46607	1.88774	0	0.46	0	0.07	0	1	0	0	0	1
3814	STM3953	yigF	putative inner membrane protein	-0.50469	1.9654	-0.62539	1.56051	1.76296	-0.47022	1.86993	0	0.353	0.841	0	1	0	0	0	0	1
2986	STM3087	yqgB	putative inner membrane protein	-0.50508	1.96341	-0.66123	1.24897	1.60619	-0.51096	1.69505	0	0.45	0.674	0	0	0	0	0	0	0
3638	STM3758	fidL	putative inner membrane protein	-0.50587	1.95937	-0.68752	1.02045	1.48991	-0.52015	1.6556	0	0.45	0.39	0.143	1	0	0	0	0	1
4433	PSLT003	repC	DNA replication	-0.50763	1.95037	-0.6547	1.30574	1.62805	-0.47287	1.85855	0	0.402	0	0.227	0	0	0	0	0	0
3887	STM4031		putative cytoplasmic protein	-0.50817	1.94761	-0.69387	0.965251	1.45643	-0.52604	1.63031	0	0.399	0.398	0.155	0	0	0	0	0	0
711	STM0731		putative inner membrane protein	-0.50824	1.94725	-0.57822	1.97054	1.95889	-0.42627	2.05859	0	0.446	0	0.203	0	0	0	0	1	1
1360	STM1400	sseC	Secretion system effector	-0.50885	1.94413	-0.44499	3.12864	2.53639	-0.29475	2.62317	1	0.461	0	0.118	0	1	0	0	1	2
707	STM0727		putative cytoplasmic protein	-0.50925	1.94209	-0.58853	1.88092	1.9115	-0.43512	2.0206	0	0.496	0	0	0	0	0	0	0	0
1761	STM1810		putative cytoplasmic protein	-0.51017	1.93738	-0.5848	1.91334	1.92536	-0.43654	2.01451	0	0.489	0	0	0	0	0	0	0	0
1086	STM1118	yccJ	putative cytoplasmic protein	-0.51116	1.93232	-0.59804	1.79825	1.86529	-0.44816	1.96463	0	0.48	0.92	0	0	0	0	0	0	0
3364	STM3480	yhfL	putative outer membrane lipoprotein	-0.51216	1.92721	-0.63046	1.51644	1.72183	-0.48431	1.80945	0	0.424	0.786	0	0	0	0	0	0	0
1362	STM1402	sseE	Secretion system effector	-0.51524	1.91147	-0.66714	1.1976	1.55453	-0.50149	1.7357	1	0.452	0	0.138	1	1	0	0	0	2
4100	STM4260		membrane permease, predicted cation efflux pump	-0.51544	1.91044	-0.7383	0.579043	1.24474	-0.53214	1.60413	0	0.345	0.148	0.127	1	0	0	0	1	2
1952	STM2011		putative cytoplasmic protein	-0.51606	1.90727	-0.70028	0.909532	1.4084	-0.51379	1.6829	0	0.411	0	0	0	0	0	0	0	0
2649	STM2738		Fels-2 prophage: similar to E. coli retron	-0.5163	1.90605	-0.627	1.54652	1.72628	-0.44438	1.98085	0	0.43	0	0.062	0	0	0	0	0	0
4326	STM4493		putative cytoplasmic protein	-0.51631	1.906	-0.58651	1.89848	1.90224	-0.44279	1.98768	0	0.476	0	0.121	0	0	0	0	0	0
827	STM0855		putative electron transfer flavoprotein beta subunit	-0.51725	1.90119	-0.79826	0.0578412	0.979516	-0.57777	1.40825	0	0.378	0.232	0.44	1	1	0	1	0	3
703	STM0723		putative ABC-type polysaccharide/polyol phosphate transport system, ATPase component	-0.51729	1.90099	-0.82711	-0.192937	0.854024	-0.59558	1.3318	0	0.397	0.254	0.246	1	0	0	0	0	1
3023	STM3125		putative cytoplasmic protein	-0.51745	1.90017	-0.57585	1.99114	1.94565	-0.42005	2.0853	0	0.465	0	0	0	0	0	0	0	0
540	STM0550	fimY	putative regulatory protein	-0.51769	1.89894	-0.59284	1.84345	1.8712	-0.44099	1.99541	0	0.465	0	0	1	0	0	0	0	1
3872	STM4016	yshA	putative outer membrane protein	-0.51778	1.89848	-0.59049	1.86388	1.88118	-0.42491	2.06443	0	0.396	0.883	0	0	0	0	0	0	0
464	STM0474	ybaJ	putative cytoplasmic protein	-0.51911	1.89168	-0.69538	0.952125	1.4219	-0.54194	1.56206	0	0.422	0.952	0.113	0	0	0	0	0	0
4102	STM4262		putative ABC-type bacteriocin/lantibiotic exporter, contain an N-terminal double-glycine peptidase domain	-0.51959	1.88923	-0.76602	0.338087	1.11366	-0.57306	1.42847	0	0.353	0.158	0.182	0	0	0	0	1	1
298	STM0305		putative cytoplasmic protein	-0.51965	1.88892	-0.57187	2.02573	1.95733	-0.42654	2.05744	0	0.488	0	0	0	0	0	0	0	0
4039	STM4199		putative cytoplasmic protein	-0.52085	1.88279	-0.54783	2.2347	2.05874	-0.40935	2.13123	0	0.464	0	0.144	0	1	0	0	1	2
4520	PSLT041	spvR	Salmonella plasmid virulence: regulation of spv operon, lysR family	-0.52118	1.8811	-0.65373	1.31417	1.59763	-0.46057	1.91135	0	0.409	0.165	0	0	0	0	0	0	0
1604	STM1650		putative reverse transcriptase	-0.52157	1.87911	-0.63381	1.48732	1.68321	-0.47433	1.85229	0	0.488	0	0	0	0	0	0	0	0
2988	STM3089	yqgD	putative inner membrane protein	-0.5217	1.87844	-0.62289	1.58224	1.73034	-0.47632	1.84374	0	0.455	0.414	0	0	0	0	0	0	0
1361	STM1401	sseD	Secretion system effector	-0.52225	1.87563	-0.57732	1.97836	1.927	-0.45264	1.9454	1	0.492	0.138	0.149	0	1	0	0	0	1
1815	STM1864		putative inner membrane protein	-0.52337	1.8699	-0.72645	0.682049	1.27598	-0.56493	1.46337	0	0.433	0	0.142	0	0	0	0	1	1
4401	STM4571		putative outer membrane protein	-0.52416	1.86587	-0.61574	1.6444	1.75513	-0.4675	1.88161	0	0.455	0.1	0.111	1	0	0	0	0	1
3895	STM4039		putative inner membrane lipoprotein	-0.52481	1.86254	-0.61969	1.61006	1.7363	-0.46842	1.87766	0	0.448	0.37	0	1	0	0	0	0	1
4099	STM4259		putative ABC exporter outer membrane component homolog	-0.52596	1.85666	-0.73223	0.631807	1.24423	-0.56064	1.48178	0	0.368	0.155	0.103	1	1	0	0	0	2
3896	STM4040	yiiG	putative cytoplasmic protein	-0.52601	1.85641	-0.55783	2.14778	2.00209	-0.40692	2.14166	0	0.459	0.656	0.153	0	0	0	0	0	0
2551	STM2630		Gifsy-1 prophage	-0.52754	1.84859	-0.6505	1.34224	1.59542	-0.51707	1.66882	0	0.462	0	0	0	0	0	0	0	0
1242	STM1281		putative inner membrane protein	-0.52907	1.84076	-0.66454	1.2202	1.53048	-0.52887	1.61816	0	0.467	0	0	0	0	0	0	0	0
3054	STM3156		putative cytoplasmic protein	-0.53033	1.83432	-0.65093	1.33851	1.58641	-0.52274	1.64448	0	0.475	0.179	0.187	0	0	0	0	0	0
4184	STM4346	yjeO	putative inner membrane protein	-0.53054	1.83325	-0.73936	0.569829	1.20154	-0.57915	1.40233	0	0.427	0.567	0.269	0	0	0	0	0	0
3049	STM3151	yghW	putative cytoplasmic protein	-0.5308	1.83192	-0.64351	1.403	1.61746	-0.49102	1.78064	0	0.47	0.779	0	0	0	0	0	0	0
2617	STM2705		Fels-2 prophage	-0.5309	1.83141	-0.69549	0.951169	1.39129	-0.53333	1.59902	0	0.429	0.112	0	0	0	0	0	0	0
1234	STM1273		putative nitric oxide reductase	-0.53228	1.82435	-0.53777	2.32215	2.07325	-0.4166	2.1001	0	0.507	0	0.127	1	0	0	0	0	1
281	STM0288		putative cytoplasmic protein	-0.5326	1.82272	-0.63734	1.45664	1.63968	-0.50433	1.72351	0	0.474	0	0	0	0	0	0	0	0
866	STM0895		Fels-1 prophage	-0.53279	1.82175	-0.627	1.54652	1.68413	-0.49106	1.78047	0	0.487	0	0.196	0	0	0	0	0	0
2780	STM2875	hilD	regulatory helix-turn-helix proteins, araC family	-0.53328	1.81924	-0.65555	1.29835	1.55879	-0.48342	1.81327	0	0.41	0.159	0	0	1	0	1	1	3
1106	STM1140	csgF	curli production assembly/transport component, 2nd curli operon	-0.53368	1.8172	-0.66994	1.17326	1.49523	-0.52281	1.64418	0	0.447	0.899	0.174	1	1	0	0	0	2
1370	STM1410		putative cytoplasmic protein	-0.5346	1.81249	-0.6566	1.28922	1.55086	-0.51042	1.69736	0	0.469	0	0.115	0	1	0	0	1	2
1591	STM1637		putative inner membrane protein	-0.53509	1.80999	-0.71545	0.777667	1.29383	-0.56005	1.48432	0	0.447	0.079	0.068	0	0	0	0	0	0
2786	STM2881	iacP	putative acyl carrier protein	-0.53531	1.80886	-0.80345	0.0127271	0.910796	-0.59767	1.32283	0	0.375	0.293	0.22	1	0	0	0	0	1
1745	STM1794		putative periplasmic protein	-0.53551	1.80784	-0.60081	1.77417	1.79101	-0.4776	1.83825	0	0.494	0	0	0	0	0	0	0	0
4496	PSLT105	trbH	conjugative transfer	-0.53656	1.80247	-0.58681	1.89587	1.84917	-0.4569	1.92711	0	0.515	0	0	0	0	0	0	0	0
981	STM1011		Gifsy-2 prophage	-0.53896	1.7902	-0.59452	1.82885	1.80953	-0.46915	1.87452	0	0.488	0	0	0	0	0	0	0	0
1401	STM1443	ydhI	putative inner membrane protein	-0.54127	1.7784	-0.6521	1.32834	1.55337	-0.5297	1.6146	0	0.47	0.782	0	0	0	0	0	0	0
1365	STM1405	sseG	Secretion system effector	-0.54128	1.77834	-0.51617	2.50991	2.14413	-0.38589	2.23193	1	0.478	0	0.096	0	0	0	0	0	0
2550	STM2629		Gifsy-1 prophage	-0.5414	1.77773	-0.59452	1.82885	1.80329	-0.4755	1.84726	0	0.488	0	0	0	0	0	0	0	0
3410	STM3527		putative inner membrane protein	-0.54335	1.76776	-0.55255	2.19367	1.98072	-0.43489	2.02159	0	0.492	0.116	0.099	0	0	0	0	0	0
1624	STM1671		putative bacterial regulatory helix-turn-helix proteins, araC family	-0.54626	1.75289	-0.72825	0.666403	1.20964	-0.57013	1.44105	0	0.384	0.288	0.067	0	0	0	0	0	0
32	STM0032		putative arylsulfatase	-0.54757	1.74619	-0.53272	2.36605	2.05612	-0.39512	2.19231	0	0.463	0	0.047	0	0	0	0	0	0
499	STM0509		putative outer membrane protein	-0.54809	1.74353	-0.60195	1.76426	1.7539	-0.49464	1.7651	0	0.502	0.117	0	0	0	0	0	1	1
34	STM0034		putative outer membrane or exported protein	-0.55004	1.73356	-0.56782	2.06094	1.89725	-0.43295	2.02992	0	0.443	0.237	0.075	1	0	0	0	0	1
1366	STM1406	ssaG	Secretion system apparatus	-0.55068	1.73029	-0.69104	0.98985	1.36007	-0.54487	1.54948	0	0.386	0	0	0	0	0	1	1	2
2979	STM3080		putative mannitol dehydrogenase	-0.55076	1.72988	-0.72121	0.727598	1.22874	-0.55769	1.49445	0	0.408	0.376	0.076	0	0	0	0	0	0
1244	STM1283	yeaJ	putative Methyl-accepting chemotaxis protein; Diguanylate cyclase/phosphodiesterase domain 1	-0.55088	1.72927	-0.69133	0.98733	1.3583	-0.55984	1.48522	0	0.448	0.68	0	1	1	0	0	0	2
3095	STM3197	glgS	glycogen biosynthesis, rpoS dependent	-0.55127	1.72727	-0.56806	2.05885	1.89306	-0.44969	1.95806	0	0.483	0.739	0	0	0	0	0	0	0
3448	STM3566		putative cytoplasmic protein	-0.5524	1.7215	-0.54977	2.21784	1.96967	-0.43463	2.02271	0	0.522	0	0	0	0	0	0	0	0
1153	STM1188		putative inner membrane lipoprotein	-0.55271	1.71991	-0.60544	1.73393	1.72692	-0.46986	1.87148	0	0.463	0.219	0.101	0	0	0	0	0	0
832	STM0860		putative inner membrane protein	-0.55272	1.71986	-0.74345	0.534277	1.12707	-0.59455	1.33622	0	0.44	0.149	0.213	1	0	0	0	0	1
687	STM0707		putative outer membrane protein	-0.55317	1.71756	-0.58155	1.94159	1.82958	-0.47329	1.85675	0	0.494	0	0	0	0	0	0	0	0
4031	STM4191		putative cytoplasmic protein	-0.55384	1.71414	-0.56625	2.07459	1.89436	-0.46128	1.90831	0	0.495	0	0	0	0	0	0	0	0
1949	STM2008		putative periplasmic protein	-0.55458	1.71035	-0.62454	1.5679	1.63913	-0.50349	1.72711	0	0.465	0	0.139	1	1	0	0	0	2
4328	STM4495		putative type II restriction enzyme, methylase subunit	-0.55463	1.7101	-0.60585	1.73036	1.72023	-0.46558	1.88985	0	0.457	0.015	0.015	0	1	0	0	0	1
1550	STM1596	ydcX	putative inner membrane protein	-0.55493	1.70856	-0.66846	1.18613	1.44735	-0.54206	1.56154	0	0.445	0.667	0	0	0	0	0	0	0
50	STM0050		putative nitrite reductase	-0.55542	1.70606	-0.55157	2.20219	1.95413	-0.44601	1.97386	0	0.482	0	0	0	0	0	0	0	0
700	STM0720		putative glycosyl transferase	-0.55652	1.70043	-0.71549	0.777319	1.23888	-0.54864	1.5333	0	0.371	0.101	0.131	0	0	0	0	0	0
2795	STM2890	spaP	surface presentation of antigens; secretory proteins	-0.55741	1.69588	-0.71054	0.820347	1.25812	-0.52306	1.6431	0	0.415	0.348	0	0	1	1	0	0	2
4055	STM4215		putative cytoplasmic protein	-0.55752	1.69532	-0.66239	1.23889	1.46711	-0.53137	1.60743	0	0.47	0	0.179	1	0	0	0	0	1
1207	STM1242	envE	putative envelope protein	-0.55854	1.69011	-0.70343	0.88215	1.28613	-0.55507	1.50569	0	0.453	0	0.191	0	0	0	0	0	0
3297	STM3411		putative cytoplasmic protein	-0.55962	1.68459	-0.73357	0.620159	1.15237	-0.59177	1.34815	0	0.428	0	0.236	0	0	0	0	0	0
2181	STM2244		homolog of virulence protein MsgA	-0.56027	1.68126	-0.74264	0.541318	1.11129	-0.61773	1.23671	0	0.389	0.224	0	0	0	0	0	0	0
2171	STM2234		putative tail fiber assembly protein	-0.56044	1.68039	-0.72195	0.721165	1.20078	-0.58891	1.36043	0	0.438	0.12	0.126	0	1	0	0	0	1
4513	PSLT025		putative cytoplasmic protein	-0.56048	1.68019	-0.68659	1.02853	1.35436	-0.56694	1.45474	0	0.483	0	0.224	0	1	0	0	0	1
4101	STM4261		putative inner membrane protein	-0.56067	1.67922	-0.59674	1.80955	1.74439	-0.47851	1.83434	0	0.485	0.054	0.114	1	1	0	0	1	3
2071	STM2133		putative cytoplasmic protein	-0.56118	1.67661	-0.65637	1.29122	1.48392	-0.54585	1.54527	0	0.501	0	0.085	0	0	0	0	0	0
81	STM0081		putative secreted protein	-0.56188	1.67303	-0.60148	1.76835	1.72069	-0.49544	1.76167	0	0.471	0	0	0	0	0	0	0	0
1791	STM1840	yobG	putative inner membrane protein	-0.56194	1.67273	-0.68969	1.00159	1.33716	-0.57861	1.40464	0	0.441	0.872	0	0	0	0	0	0	0
2312	STM2376		putative periplasmic protein	-0.56206	1.67211	-0.61583	1.64361	1.65786	-0.52132	1.65057	0	0.514	0	0	0	0	0	0	0	0
1623	STM1670		putative serine/threonine protein kinase	-0.56252	1.66976	-0.64325	1.40526	1.53751	-0.53596	1.58773	0	0.483	0	0.114	1	1	0	0	0	2
3015	STM3117		putative lactoylglutathione lyase	-0.56413	1.66153	-0.84558	-0.353488	0.654022	-0.64608	1.11502	0	0.378	0.201	0.472	0	0	0	0	0	0
2606	STM2694		Fels-2 prophage: similar to late control gene B in phage	-0.56437	1.6603	-0.66635	1.20447	1.43239	-0.52167	1.64907	0	0.445	0.5	0.25	0	0	0	0	0	0
2077	STM2139		putative inner membrane protein	-0.56576	1.6532	-0.55522	2.17046	1.91183	-0.45138	1.9508	0	0.507	0	0	0	1	0	0	0	1
2726	STM2816		putative glycoporin	-0.56752	1.6442	-0.68019	1.08416	1.36418	-0.56951	1.44371	0	0.475	0	0.064	0	0	0	0	0	0
2382	STM2453		putative cytoplasmic protein	-0.56923	1.63546	-0.53623	2.33554	1.9855	-0.42963	2.04417	0	0.53	0	0	0	0	0	0	0	0
2089	STM2151	stcB	putative periplasmic chaperone protein	-0.56989	1.63208	-0.68077	1.07912	1.3556	-0.51974	1.65736	0	0.403	0.634	0	0	1	0	0	0	1
701	STM0721		putative glycosyl transferase	-0.56993	1.63188	-0.78708	0.155023	0.893452	-0.61309	1.25663	0	0.359	0.149	0.162	0	0	0	0	0	0
4525	PSLT047		putative cytoplasmic protein	-0.57014	1.63081	-0.65092	1.33859	1.4847	-0.54911	1.53128	0	0.533	0	0.136	0	0	0	0	0	0
597	STM0610		putative component of anaerobic dehydrogenases	-0.57063	1.6283	-0.76065	0.384766	1.00653	-0.61439	1.25105	0	0.434	0.194	0	0	0	0	0	0	0
363	STM0373	yaiU	flagellar protein; similar to 3rd module of ATP-binding components of transporters	-0.5708	1.62743	-0.64208	1.41543	1.52143	-0.52507	1.63448	0	0.463	0.436	0.021	0	0	0	0	0	0
3538	STM3657		putative outer membrane lipoprotein	-0.5722	1.62028	-0.59513	1.82355	1.72191	-0.49455	1.76549	0	0.474	0	0	0	0	0	0	0	0
1227	STM1266		putative transcriptional regulator	-0.57237	1.61941	-0.69009	0.998108	1.30876	-0.56614	1.45817	0	0.463	0.266	0.11	0	1	0	0	0	1
1805	STM1854		putative inner membrane protein	-0.57253	1.61859	-0.5515	2.2028	1.91069	-0.46109	1.90912	0	0.494	0	0	0	0	0	0	0	0
825	STM0853	yliH	putative cytoplasmic protein	-0.57338	1.61424	-0.63776	1.45299	1.53361	-0.54056	1.56798	0	0.504	0.764	0.126	0	1	0	0	0	1
4322	STM4489		putative superfamily I DNA helicases	-0.57351	1.61358	-0.67771	1.10572	1.35965	-0.56166	1.47741	0	0.473	0.196	0.074	0	0	0	0	0	0
3036	STM3138		putative methyl-accepting chemotaxis protein	-0.57453	1.60836	-0.77024	0.301405	0.954884	-0.62028	1.22577	0	0.431	0.128	0.148	1	1	0	0	0	2
30	STM0030		putative transcriptional regulator, LysR family	-0.57457	1.60816	-0.73133	0.63963	1.12389	-0.5813	1.3931	0	0.388	0.204	0	1	1	0	0	0	2
4295	STM4461	pyrL	pyrBI operon leader peptide	-0.57477	1.60714	-0.6088	1.70472	1.65593	-0.5251	1.63435	0	0.465	0.848	0	0	1	0	0	0	1
2516	STM2587		Gifsy-1 prophage: similar to phage tail assembly protein	-0.57562	1.60279	-0.59489	1.82563	1.71421	-0.4878	1.79446	0	0.483	0.124	0.172	0	0	0	0	1	1
4514	PSLT026		putative periplasmic protein	-0.57768	1.59226	-0.61241	1.67334	1.6328	-0.51464	1.67925	0	0.447	0	0.15	0	1	1	0	1	3
4056	STM4216		putative inner membrane protein	-0.5788	1.58654	-0.70839	0.839036	1.21279	-0.59254	1.34485	0	0.478	0	0.202	0	0	0	0	0	0
1289	STM1328		putative outer membrane protein	-0.57926	1.58418	-0.68797	1.01654	1.30036	-0.56776	1.45122	0	0.477	0	0	0	1	0	0	0	1
1616	STM1662	ynaJ	putative inner membrane protein	-0.57968	1.58204	-0.58454	1.9156	1.74882	-0.49943	1.74454	0	0.48	0.881	0	0	0	0	0	0	0
2172	STM2235		putative phage protein	-0.57975	1.58168	-0.62765	1.54087	1.56127	-0.53025	1.61224	0	0.505	0.104	0.077	0	1	0	0	0	1
4335	STM4502		putative cytoplasmic protein	-0.57996	1.5806	-0.60909	1.7022	1.6414	-0.48907	1.78901	0	0.475	0	0	0	0	0	0	0	0
2368	STM2439	yfeL	putative membrane carboxypeptidase (penicillin-binding protein)	-0.58004	1.5802	-0.66656	1.20264	1.39142	-0.55818	1.49234	0	0.501	0.134	0.073	0	0	0	0	0	0
1944	STM1999		putative cytoplasmic protein	-0.58008	1.57999	-0.60043	1.77748	1.67873	-0.51658	1.67092	0	0.516	0	0	0	0	0	0	0	0
1327	STM1367	ydiH	putative cytoplasmic protein	-0.58098	1.57539	-0.59727	1.80495	1.69017	-0.50646	1.71436	0	0.463	0.8	0	0	0	0	0	0	0
4002	STM4158		putative cytoplasmic protein	-0.58117	1.57442	-0.5276	2.41055	1.99249	-0.45107	1.95214	0	0.532	0	0	1	0	0	0	0	1
2485	STM2557	cadC	transcriptional activator of cad operon (OmpR family)	-0.58124	1.57406	-0.67816	1.10181	1.33794	-0.56158	1.47775	0	0.477	0.591	0	0	1	0	0	0	1
2934	STM3034		putative cytoplasmic protein	-0.58136	1.57345	-0.70903	0.833472	1.20346	-0.57308	1.42838	0	0.476	0	0	0	0	0	0	0	0
1355	STM1395	ssaD	Secretion system apparatus	-0.58281	1.56604	-0.72126	0.727163	1.1466	-0.58936	1.3585	0	0.437	0	0	1	1	1	0	1	4
3659	STM3779		putative phosphotransferase system, HPr-related protein	-0.58367	1.56164	-0.74332	0.535407	1.04852	-0.58734	1.36717	0	0.394	0.292	0.079	0	0	0	0	0	0
1097	STM1130		putative inner membrane protein	-0.58712	1.544	-0.66899	1.18152	1.36276	-0.55049	1.52536	0	0.406	0.399	0.179	0	0	0	0	0	0
2775	STM2870	orgA	putative inner membrane protein	-0.58838	1.53756	-0.60178	1.76574	1.65165	-0.49237	1.77485	0	0.479	0.166	0.101	0	0	0	0	0	0
2087	STM2149	stcD	putative outer membrane lipoprotein	-0.58863	1.53628	-0.6921	0.980636	1.25846	-0.59095	1.35167	0	0.413	0.513	0	1	0	0	0	0	1
2691	STM2781	virK	virulence gene; homologous sequence to virK in Shigella	-0.59052	1.52662	-0.66429	1.22237	1.3745	-0.53961	1.57206	0	0.445	0.359	0	0	0	0	0	0	0
4511	PSLT019	pefB	plasmid-encoded fimbriae;regulation	-0.5906	1.52621	-0.72345	0.708127	1.11717	-0.62238	1.21675	0	0.437	0	0.15	1	0	0	0	0	1
2804	STM2899	invF	invasion protein	-0.59084	1.52498	-0.73361	0.619811	1.0724	-0.61414	1.25212	0	0.46	0.13	0.148	0	0	0	0	1	1
3660	STM3780		putative fructose-bisphosphate aldolase class-II	-0.59096	1.52437	-0.73164	0.636935	1.08065	-0.5481	1.53561	0	0.434	0.357	0.115	0	0	0	0	0	0
856	STM0885		putative inner membrane protein; homology to SgaT from Vibrio	-0.59102	1.52406	-0.78919	0.136682	0.830373	-0.66567	1.03092	0	0.388	0.236	0.057	1	0	0	0	0	1
2645	STM2734		Fels-2 prophage: hypothetical protein	-0.59117	1.5233	-0.60763	1.71489	1.61909	-0.51088	1.69539	0	0.463	0	0	0	0	0	0	0	0
19	STM0019		putative hydroxymethyltransferase	-0.59173	1.52043	-0.54503	2.25904	1.88974	-0.45924	1.91706	0	0.549	0	0.037	0	0	0	0	0	0
3503	STM3621	yhjR	putative cytoplasmic protein	-0.59204	1.51885	-0.64134	1.42187	1.47036	-0.54886	1.53235	0	0.463	0.687	0.269	1	0	0	0	0	1
2690	STM2780	pipB-2	homologue of pipB, putative pentapeptide repeats (8 copies)	-0.59227	1.51767	-0.75328	0.44883	0.983252	-0.6296	1.18576	1	0.444	0.137	0.18	0	0	0	0	0	0
1499	STM1544	pqaA	PhoPQ-regulated protein	-0.59229	1.51757	-0.67567	1.12345	1.32051	-0.57573	1.41701	0	0.418	0	0.058	0	0	0	0	0	0
2313	STM2377		putative inner membrane protein	-0.59427	1.50745	-0.7504	0.473864	0.990657	-0.62887	1.18889	0	0.407	0	0	0	0	0	0	0	0
4054	STM4214		putative cytoplasmic protein	-0.59509	1.50326	-0.56506	2.08493	1.79409	-0.47866	1.8337	0	0.523	0	0.338	1	0	0	0	0	1
992	STM1022		Gifsy-2 prophage; putataive molecular chaperone, DnaJ family	-0.59529	1.50223	-0.59978	1.78313	1.64268	-0.50406	1.72467	0	0.464	0.351	0.174	0	0	0	0	0	0
4158	STM4319	phoN	non-specific acid phosphatase	-0.59601	1.49855	-0.66744	1.19499	1.34677	-0.56077	1.48123	0	0.453	0.1	0.136	1	0	0	0	0	1
347	STM0357	mod	DNA methylase; restriction system	-0.59608	1.4982	-0.5732	2.01417	1.75619	-0.47044	1.86899	0	0.468	0.029	0.038	0	0	0	0	0	0
1280	STM1319	cedA	cell division modulator, affects inhibition after overreplication of chromosome in dnaAcos mutants	-0.5963	1.49707	-0.59739	1.8039	1.65049	-0.52587	1.63104	0	0.512	0.825	0	0	0	0	0	0	0
3004	STM3105	yggM	putative periplasmic protein	-0.59729	1.49201	-0.59156	1.85458	1.6733	-0.52054	1.65392	0	0.462	0.645	0.161	0	0	0	0	0	0
830	STM0858		putative dehydrogenase (flavoproteins)	-0.59762	1.49032	-0.72841	0.665012	1.07767	-0.5648	1.46393	0	0.433	0.175	0.504	1	1	0	0	0	2
324	STM0334		putative cytoplasmic protein	-0.59766	1.49012	-0.60086	1.77374	1.63193	-0.52123	1.65096	0	0.518	0	0	0	0	0	0	0	0
4052	STM4212		putative phage tail core protein	-0.5977	1.48991	-0.7029	0.886757	1.18834	-0.60069	1.30986	0	0.447	0	0.155	0	0	1	0	0	1
1553	STM1599	pdgL	Periplasmic dipeptidase for D-ala-D-ala digestion in peptidoglycan	-0.59856	1.48552	-0.60142	1.76887	1.62719	-0.49807	1.75038	0	0.475	0.242	0.156	0	0	0	0	0	0
20	STM0020		putative cytoplasmic protein	-0.59883	1.48414	-0.69545	0.951516	1.21783	-0.60968	1.27127	0	0.47	0.256	0	0	0	0	0	0	0
364	STM0374	yaiV	putative inner membrane protein	-0.59887	1.48393	-0.5944	1.82989	1.65691	-0.50715	1.7114	0	0.425	0.71	0	1	1	0	0	0	2
4330	STM4497		putative cytoplasmic protein	-0.59907	1.48291	-0.64023	1.43152	1.45721	-0.54403	1.55309	0	0.498	0	0	0	0	0	0	0	0
3255	STM3363	yhcO	putative cytoplasmic protein	-0.59912	1.48266	-0.70872	0.836167	1.15941	-0.59876	1.31815	0	0.449	0.767	0.144	0	1	0	0	0	1
697	STM0717		putative inner membrane protein	-0.59965	1.47995	-0.55266	2.19272	1.83633	-0.4868	1.79876	0	0.555	0	0	0	0	0	0	0	0
867	STM0896		Fels-1 prophage	-0.5997	1.47969	-0.66498	1.21638	1.34803	-0.56749	1.45238	0	0.487	0.246	0	0	0	0	0	0	0
1230	STM1269		putative chorismate mutase	-0.60029	1.47667	-0.69899	0.920745	1.19871	-0.57959	1.40044	0	0.472	0.149	0.138	0	0	0	0	0	0
114	STM0114	leuL	leu operon leader peptide	-0.60034	1.47642	-0.63993	1.43412	1.45527	-0.57025	1.44053	0	0.477	0.75	0	0	0	0	0	0	0
3551	STM3670		putative chemotaxis protein, resembles cheA	-0.6013	1.47151	-0.55518	2.17081	1.82116	-0.47888	1.83276	0	0.519	0	0	1	0	0	0	0	1
2310	STM2374		putatiave helix-turn-helix regulatory protein	-0.6018	1.46895	-0.73358	0.620072	1.04451	-0.61502	1.24835	0	0.472	0.451	0.134	0	0	0	0	0	0
352	STM0362		putative cytoplasmic protein	-0.60273	1.4642	-0.59379	1.8352	1.6497	-0.53317	1.5997	0	0.571	0	0.216	0	0	0	0	0	0
2779	STM2874	prgH	cell invasion protein	-0.6041	1.4572	-0.59081	1.8611	1.65915	-0.50428	1.72372	0	0.49	0	0.064	1	1	1	1	1	5
2758	STM2853	hycA	transcriptional repressor of hyc and hyp operons	-0.60425	1.45643	-0.56833	2.05651	1.75647	-0.50645	1.71441	0	0.51	0.882	0.078	0	0	0	0	0	0
4453	PSLT053	parB	plasmid partition protein B	-0.60502	1.45249	-0.67976	1.0879	1.2702	-0.56601	1.45873	0	0.448	0	0.132	1	0	0	0	0	1
4308	STM4474	yjgN	putative inner membrane protein	-0.60591	1.44794	-0.65097	1.33816	1.39305	-0.53465	1.59335	0	0.443	0.43	0.111	0	0	0	0	0	0
3687	STM3804	yidG	putative inner membrane protein	-0.60643	1.44529	-0.56545	2.08154	1.76341	-0.50128	1.7366	0	0.525	0.8	0.117	1	0	0	0	0	1
3634	STM3754		putative cytoplasmic protein	-0.60666	1.44411	-0.67147	1.15996	1.30204	-0.58625	1.37185	0	0.486	0	0.198	1	0	0	0	0	1
702	STM0722		putative ABC transporter permease protein	-0.6067	1.4439	-0.79735	0.0657514	0.754828	-0.6851	0.947515	0	0.361	0.105	0.074	0	0	0	0	0	0
2169	STM2232	oafA	O-antigen five: acetylation of the O-antigen (LPS)	-0.60779	1.43833	-0.79448	0.0906988	0.764516	-0.67441	0.993404	0	0.385	0	0.126	0	0	0	0	0	0
2777	STM2872	prgJ	cell invasion protein; cytoplasmic	-0.608	1.43726	-0.58453	1.91569	1.67647	-0.49686	1.75557	0	0.475	0	0.208	1	1	0	0	0	2
4405	STM4575		putative outer membrane protein	-0.6089	1.43266	-0.65534	1.30017	1.36642	-0.55984	1.48522	0	0.467	0.341	0.131	0	0	0	0	0	0
2136	STM2197		putative phosphoserine phosphatase	-0.60935	1.43036	-0.72172	0.723165	1.07676	-0.59187	1.34772	0	0.446	0.261	0.18	1	0	0	0	0	1
2176	STM2239		putative phage protein; homology to antiterminator protein Q of phage P5	-0.60949	1.42964	-0.63481	1.47863	1.45414	-0.53991	1.57077	0	0.443	0.475	0.23	0	0	0	0	0	0
3842	STM3981		putative cytoplasmic protein	-0.60972	1.42847	-0.51629	2.50886	1.96866	-0.42799	2.05121	0	0.502	0	0	0	0	0	0	0	0
2546	STM2618		Gifsy-1 prophage	-0.60991	1.42749	-0.66862	1.18474	1.30612	-0.59847	1.31939	0	0.514	0	0	0	0	0	0	0	0
2240	STM2304	pmrD	polymyxin resistance protein B	-0.61009	1.42657	-0.6368	1.46133	1.44395	-0.56364	1.46891	0	0.482	0.553	0	0	0	1	0	0	1
300	STM0307		homology to Shigella VirG protein	-0.61014	1.42632	-0.6192	1.61432	1.52032	-0.55879	1.48973	0	0.472	0.156	0	0	0	0	0	0	0
3774	STM3907		putative cytoplasmic protein	-0.61134	1.42018	-0.728	0.668576	1.04438	-0.63312	1.17065	0	0.449	0	0.195	1	0	0	0	0	1
1440	STM1485		acid shock protein	-0.6132	1.41068	-0.68121	1.0753	1.24299	-0.5939	1.33901	0	0.5	0	0.223	0	0	0	0	0	0
3773	STM3906		putative cytoplasmic protein	-0.61345	1.4094	-0.72867	0.662752	1.03607	-0.62091	1.22306	0	0.438	0	0	0	0	0	0	0	0
528	STM0538		putative outer membrane protein	-0.61442	1.40444	-0.65351	1.31608	1.36026	-0.56741	1.45272	0	0.517	0	0	0	0	0	0	0	0
1505	STM1550		putative cytoplasmic protein	-0.61503	1.40132	-0.80381	0.00959784	0.705459	-0.6864	0.941934	0	0.423	0.585	0.234	0	0	0	0	0	0
2787	STM2882	sipA	cell invasion protein	-0.61532	1.39984	-0.56149	2.11596	1.7579	-0.47501	1.84937	1	0.48	0.089	0.099	0	1	0	0	1	2
1626	STM1673		putative outer membrane lipoprotein	-0.61542	1.39933	-0.68484	1.04374	1.22154	-0.58917	1.35931	0	0.472	0.274	0	0	0	0	0	0	0
2837	STM2932	ygbE	putative inner membrane protein	-0.61609	1.3959	-0.64223	1.41413	1.40502	-0.56419	1.46655	0	0.489	0.602	0.161	0	0	0	0	0	0
4327	STM4494		putative ABC-type sugar/spermidine/putrescine transport systems, ATPase component	-0.61864	1.38287	-0.56887	2.05181	1.71734	-0.48855	1.79125	0	0.498	0.08	0.077	0	0	1	0	0	1
853	STM0881	ybjO	putative inner membrane protein	-0.61889	1.38159	-0.6442	1.39701	1.3893	-0.57829	1.40602	0	0.505	0.796	0.197	0	0	0	0	0	0
1813	STM1862	pagO	PhoPQ-activated gene; predicted integral membrane protein	-0.61892	1.38143	-0.77271	0.279934	0.830684	-0.621	1.22268	0	0.412	0.224	0.158	1	0	0	0	0	1
369	STM0379	yaiZ	putative inner membrane protein	-0.61935	1.37924	-0.61274	1.67047	1.52485	-0.56151	1.47805	0	0.479	0.817	0	1	0	0	0	0	1
1506	STM1551		putative cytoplasmic protein	-0.61963	1.3778	-0.70148	0.899101	1.13845	-0.60645	1.28514	0	0.444	0.28	0.232	1	1	0	0	0	2
4152	STM4313		putative cytoplasmic protein	-0.62022	1.37479	-0.65905	1.26792	1.32136	-0.59566	1.33145	0	0.479	0	0.169	0	0	0	0	0	0
4324	STM4491		putative ATP-dependent Lon protease	-0.62033	1.37423	-0.69348	0.968641	1.17143	-0.60673	1.28393	0	0.509	0	0	0	0	0	0	0	0
773	STM0800	slrP	leucine-rich repeat protein	-0.62052	1.37325	-0.58593	1.90352	1.63839	-0.50201	1.73347	1	0.46	0.075	0.131	0	0	0	0	0	0
3236	STM3343		putative cytoplasmic protein	-0.62056	1.37305	-0.67527	1.12693	1.24999	-0.60014	1.31222	0	0.477	0	0	0	0	0	0	0	0
3642	STM3762	cigR	putative inner membrane protein	-0.62064	1.37264	-0.616	1.64214	1.50739	-0.53421	1.59524	0	0.509	0	0.189	1	0	0	0	0	1
3654	STM3774		putative inner membrane protein	-0.62068	1.37244	-0.6304	1.51696	1.4447	-0.57621	1.41495	0	0.515	0	0	0	0	0	0	0	0
4093	STM4253		putative outer membrane lipoprotein	-0.62069	1.37239	-0.7039	0.878065	1.12523	-0.64222	1.13159	0	0.514	0	0.139	0	0	0	0	0	0
460	STM0470	rpmJ2	putative 50S ribosomal protein L36 (second copy)	-0.62077	1.37198	-0.64701	1.37258	1.37228	-0.53806	1.57871	0	0.436	0	0.391	0	0	0	0	0	0
4470	PSLT077	traA	conjugative transfer: fimbrial subunit	-0.6212	1.36978	-0.63135	1.50871	1.43924	-0.56769	1.45152	0	0.536	0	0	0	0	0	0	0	0
2749	STM2844		putative periplasmic or exported protein	-0.62191	1.36615	-0.65781	1.2787	1.32243	-0.60505	1.29115	0	0.528	0	0	0	0	0	0	0	0
3663	STM3783		putative periplasmic protein	-0.62212	1.36507	-0.76661	0.332959	0.849017	-0.66558	1.03131	0	0.39	0.368	0	0	0	0	0	0	0
1620	STM1667		putative thiol peroxidase	-0.62237	1.3638	-0.7682	0.319138	0.841467	-0.6662	1.02865	0	0.445	0.195	0.189	1	1	0	0	0	2
644	STM0657	ybeU	putative cytoplasmic protein	-0.62283	1.36145	-0.6643	1.22229	1.29187	-0.59469	1.33562	0	0.512	0.628	0	0	0	0	0	0	0
1885	STM1934		putative outer membrane lipoprotein	-0.62395	1.35572	-0.56282	2.1044	1.73006	-0.50152	1.73557	0	0.531	0.505	0.144	1	0	0	0	0	1
3243	STM3350		putative inner membrane protein	-0.62395	1.35572	-0.63802	1.45073	1.40322	-0.57015	1.44096	0	0.539	0.185	0.103	0	0	0	0	0	0
2524	STM2595		Gifsy-1 prophage: similar to minor tail protein	-0.62497	1.35051	-0.66798	1.1903	1.2704	-0.59804	1.32124	0	0.553	0	0.134	0	0	0	0	0	0
2652	STM2741		putative periplasmic protein	-0.62577	1.34642	-0.53298	2.36379	1.8551	-0.48701	1.79786	0	0.556	0	0	0	0	0	0	0	0
3806	STM3944		putative inner membrane protein	-0.62649	1.34273	-0.66858	1.18508	1.26391	-0.6139	1.25316	0	0.506	0	0	0	0	0	0	0	0
3927	STM4070		putative cytoplasmic protein	-0.62655	1.34243	-0.63936	1.43908	1.39075	-0.57193	1.43332	0	0.473	0.721	0	0	0	1	0	0	1
569	STM0582	ybdJ	putative inner membrane protein	-0.62655	1.34243	-0.6537	1.31443	1.32843	-0.60762	1.28011	0	0.512	0.854	0	0	0	0	0	0	0
3964	STM4107	yijF	putative periplasmic protein	-0.62727	1.33875	-0.67015	1.17144	1.25509	-0.60459	1.29312	0	0.498	0.638	0	0	0	0	0	0	0
1539	STM1585		putative outer membrane lipoprotein	-0.62731	1.33854	-0.64207	1.41552	1.37703	-0.55028	1.52626	0	0.439	0.479	0	1	1	0	0	0	2
2638	STM2727		Fels-2 prophage: similar to protein in phage 186, and to retron in E coli	-0.62732	1.33849	-0.60118	1.77096	1.55472	-0.53025	1.61224	0	0.452	0.228	0.218	0	1	0	0	0	1
2038	STM2099	wcaM	putative colanic acid biosynthesis protein	-0.62819	1.33404	-0.62767	1.54069	1.43737	-0.58072	1.39559	0	0.512	0.769	0.054	1	1	0	0	0	2
2032	STM2093	rfbI	LPS side chain defect: CDP-6-deoxy-delta3,4-glucoseen reductase	-0.62823	1.33384	-0.79999	0.0428032	0.688321	-0.65827	1.06269	0	0.405	0.2	0.191	1	1	0	0	1	3
2635	STM2723		Fels-2 prophage: similar to gpQ, portal vector protein, in phage P2	-0.62906	1.3296	-0.57764	1.97558	1.65259	-0.50021	1.74119	0	0.53	0	0	0	0	0	0	0	0
1930	STM1984	yodD	putative cytoplasmic protein	-0.62983	1.32566	-0.55363	2.18429	1.75497	-0.51986	1.65684	0	0.48	0.92	0	0	0	0	0	0	0
2445	STM2517	sinH	Similar to E. coli intimin and Y. pestis invasin proteins	-0.62997	1.32494	-0.56804	2.05903	1.69199	-0.49459	1.76532	0	0.521	0.227	0	0	0	0	0	0	0
3486	STM3604		putative inner membrane protein	-0.63019	1.32382	-0.58209	1.9369	1.63036	-0.5411	1.56566	0	0.566	0	0	0	0	0	0	0	0
1284	STM1323	yniB	putative regulator	-0.63126	1.31835	-0.71544	0.777754	1.04805	-0.65149	1.09179	0	0.461	0.837	0.18	0	0	0	0	0	0
4512	PSLT023	repA2	DNA replication	-0.63151	1.31707	-0.64252	1.41161	1.36434	-0.57281	1.42954	0	0.522	0	0	0	0	0	0	0	0
1369	STM1409	ssaJ	Secretion system apparatus: homology with the yscJ/mxiJ/prgK family of lipoproteins	-0.63194	1.31487	-0.71744	0.760369	1.03762	-0.62042	1.22517	0	0.421	0.12	0.076	1	1	1	0	1	4
1760	STM1809		putative cytoplasmic protein	-0.63207	1.31421	-0.65507	1.30252	1.30836	-0.60412	1.29514	0	0.457	0.561	0	0	0	0	0	0	0
4489	PSLT098	traQ	conjugative transfer: fimbrial synthesis	-0.63346	1.3071	-0.62436	1.56947	1.43828	-0.57526	1.41903	0	0.515	0	0.144	0	0	0	0	0	0
1008	STM1038		Gifsy-2 prophage; probable major tail protein	-0.63377	1.30552	-0.65288	1.32156	1.31354	-0.58617	1.37219	0	0.509	0	0.124	0	0	0	0	0	0
2659	STM2748		putative transcriptional regulator	-0.63406	1.30404	-0.8137	-0.0763709	0.613832	-0.72514	0.775635	0	0.463	0.153	0.127	0	0	0	0	0	0
899	STM0927		Fels-1 prophage; putative tail assembly protein	-0.63422	1.30322	-0.74341	0.534624	0.918921	-0.63993	1.14142	0	0.473	0.618	0.183	1	0	0	0	0	1
865	STM0894		Fels-1 prophage; putative excisionase	-0.63475	1.30051	-0.66078	1.25289	1.2767	-0.58019	1.39786	0	0.471	0.25	0	0	0	0	0	0	0
1000	STM1030		Gifsy-2 prophage	-0.63518	1.29831	-0.71923	0.744809	1.02156	-0.64822	1.10583	0	0.514	0	0.158	0	0	0	0	0	0
1684	STM1730	yciE	putative cytoplasmic protein	-0.63525	1.29795	-0.69801	0.929264	1.11361	-0.62607	1.20091	0	0.427	0.857	0.179	1	1	0	0	0	2
4126	STM4286	lpxO	putative dioxygenase for synthesis of lipid	-0.63698	1.28911	-0.66992	1.17344	1.23127	-0.59908	1.31677	0	0.506	0	0.182	0	0	0	0	0	0
1233	STM1272	yoaG	putative cytoplasmic protein	-0.63713	1.28834	-0.61739	1.63005	1.4592	-0.57429	1.42319	0	0.484	0.967	0	0	0	0	0	0	0
4092	STM4252		putative inner membrane protein	-0.63718	1.28809	-0.47782	2.84326	2.06567	-0.44592	1.97424	0	0.58	0.179	0	0	0	0	0	0	0
1884	STM1933		putative ribose 5-phosphate isomerase	-0.63853	1.28118	-0.63983	1.43499	1.35809	-0.55779	1.49402	0	0.489	0.123	0.094	0	0	0	0	0	0
1210	STM1246	pagC	PhoP regulated: reduced macrophage survival	-0.63863	1.28067	-0.75515	0.432575	0.856624	-0.6509	1.09433	0	0.433	0.362	0.13	1	0	0	0	0	1
1975	STM2036	pocR	Propanediol utilization: transcriptional regulation, AraC family	-0.63888	1.27939	-0.59412	1.83233	1.55586	-0.5078	1.70861	0	0.46	0.129	0.112	0	1	0	0	0	1
2926	STM3025		putative cytoplasmic protein	-0.63924	1.27755	-0.59263	1.84528	1.56142	-0.54397	1.55334	0	0.546	0	0.103	1	0	0	0	0	1
1909	STM1962	fliT	flagellar biosynthesis; possible export chaperone for FliD	-0.64101	1.26851	-0.78962	0.132944	0.700725	-0.70928	0.843717	0	0.508	0.311	0.238	0	0	0	0	0	0
4357	STM4524	hsdS	specificity determinant for hsdM and hsdR	-0.64116	1.26774	-0.81626	-0.0986237	0.584557	-0.72479	0.777138	0	0.41	0.435	0	1	1	0	0	0	2
4046	STM4206		putative phage glucose translocase	-0.64182	1.26436	-0.68997	0.999151	1.13176	-0.63096	1.17992	0	0.436	0.692	0	1	0	0	0	0	1
1224	STM1263		putative periplasmic protein	-0.64188	1.26406	-0.69694	0.938565	1.10131	-0.62888	1.18885	0	0.465	0.716	0.051	1	1	0	0	0	2
1599	STM1645	ynbE	putative outer membrane lipoprotein	-0.64332	1.2567	-0.62177	1.59198	1.42434	-0.5532	1.51372	0	0.461	0.714	0	0	0	0	0	0	0
1237	STM1276		putative periplasmic protein	-0.64373	1.2546	-0.5909	1.86032	1.55746	-0.56342	1.46985	0	0.559	0	0.146	0	0	0	0	0	0
1905	STM1958	fliB	N-methylation of lysine residues in flagellin	-0.64405	1.25296	-0.63535	1.47394	1.36345	-0.57031	1.44027	0	0.492	0	0.065	0	0	0	0	0	0
885	STM0913		Fels-1 prophage	-0.64416	1.2524	-0.57125	2.03112	1.64176	-0.53874	1.57579	0	0.599	0	0	0	0	0	0	0	0
2790	STM2885	sipB	cell invasion protein	-0.64436	1.25138	-0.53784	2.32154	1.78646	-0.48179	1.82026	1	0.523	0	0.125	1	1	0	0	0	2
3871	STM4015		putative cytoplasmic protein	-0.64441	1.25112	-0.66821	1.1883	1.21971	-0.60252	1.30201	0	0.486	0	0.184	0	0	0	0	0	0
2091	STM2153	yehE	putative outer membrane protein	-0.64504	1.2479	-0.66631	1.20482	1.22636	-0.62966	1.1855	0	0.484	0.462	0.215	0	0	0	0	0	0
1456	STM1501	ynfC	putative inner membrane lipoprotein	-0.64538	1.24617	-0.67896	1.09486	1.17051	-0.64396	1.12412	0	0.508	0.715	0.092	1	1	0	0	0	2
4329	STM4496		putative ATPase involved in DNA repair	-0.6457	1.24453	-0.588	1.88552	1.56503	-0.5236	1.64079	0	0.501	0	0.118	0	0	0	0	0	0
1929	STM1982	rcsA	positive transcriptional regulator of capsular/exo- polysaccharide synthesis (LuxR/UhpA family)	-0.64608	1.24259	-0.79364	0.0980005	0.670294	-0.69962	0.885185	0	0.388	0.879	0	0	0	0	0	0	0
461	STM0471	ylaC	putative inner membrane protein	-0.64615	1.24223	-0.67321	1.14484	1.19353	-0.62597	1.20134	0	0.489	0.801	0	0	1	0	0	0	1
4135	STM4295	adiY	transcriptional activator of adiA (AraC/XylS family)	-0.64675	1.23916	-0.67624	1.1185	1.17883	-0.59979	1.31373	0	0.435	0.798	0.126	0	0	0	0	0	0
1683	STM1729	yciF	putative cytoplasmic protein	-0.64683	1.23875	-0.69393	0.964729	1.10174	-0.63063	1.18134	0	0.429	0.862	0.108	0	0	0	0	0	0
2022	STM2083	rfbK	LPS side chain defect: phosphomannomutase	-0.64706	1.23758	-0.7626	0.367816	0.802696	-0.629	1.18834	0	0.409	0.18	0.195	0	0	0	0	0	0
1381	STM1421	ssaT	Secretion system apparatus: homology with YscT of the secretion system of Yersinia	-0.64735	1.23609	-0.88149	-0.665635	0.28523	-0.77373	0.567053	0	0.39	0.147	0	0	1	1	0	0	2
3400	STM3516		putative cytoplasmic protein	-0.64835	1.23098	-0.71216	0.806265	1.01862	-0.63379	1.16777	0	0.425	0.78	0	1	0	0	0	0	1
2810	STM2905		putative acetyltransferase	-0.64851	1.23016	-0.82803	-0.200934	0.514615	-0.73945	0.714207	0	0.474	0.131	0.166	0	0	0	0	0	0
4149	STM4309		putative periplasmic or exported protein	-0.64856	1.22991	-0.57423	2.00522	1.61756	-0.53558	1.58936	0	0.534	0	0	0	0	0	0	0	0
3867	STM4011		putative inner membrane protein	-0.64893	1.22802	-0.71339	0.795573	1.0118	-0.66068	1.05234	0	0.494	0	0	1	0	0	0	0	1
1107	STM1141	csgE	curli production assembly/transport component, 2nd curli operon	-0.64907	1.2273	-0.69459	0.958992	1.09315	-0.64742	1.10926	0	0.446	0.901	0.137	1	1	0	0	0	2
2737	STM2832	srlA	PTS family, glucitol/sorbitol-specific enzyme IIC component,one of two IIC components	-0.64919	1.22669	-0.64346	1.40344	1.31506	-0.59255	1.3448	0	0.506	0.973	0.102	0	0	0	0	0	0
2984	STM3085		putative outer membrane lipoprotein	-0.64959	1.22464	-0.67247	1.15127	1.18796	-0.62828	1.19143	0	0.483	0	0.103	0	0	0	0	0	0
2798	STM2893	invI	surface presentation of antigens; secretory proteins	-0.65021	1.22147	-0.69362	0.967424	1.09445	-0.63504	1.16241	0	0.436	0	0.272	1	1	0	0	1	3
2434	STM2506		putative inner membrane protein	-0.65057	1.21963	-0.60841	1.70811	1.46387	-0.56688	1.455	0	0.482	0.841	0	0	1	0	0	0	1
3602	STM3721	rfaP	lipopolysaccharide core biosynthesis; phosphorylation of core heptose	-0.65071	1.21892	-0.70748	0.846946	1.03293	-0.67108	1.0077	0	0.462	0.83	0.166	0	0	0	0	0	0
297	STM0304	sinR	transcriptional regulator	-0.65106	1.21713	-0.79356	0.0986959	0.657912	-0.68098	0.965201	0	0.398	0.279	0	0	0	0	0	0	0
1003	STM1033		Gifsy-2 prophage; resembles Clp protease	-0.65125	1.21616	-0.66474	1.21846	1.21731	-0.61434	1.25127	0	0.525	0.066	0.081	0	0	0	0	0	0
1721	STM1770	chaB	cation transport regulator	-0.65131	1.21585	-0.76095	0.382158	0.799004	-0.68672	0.940561	0	0.457	0.829	0	0	0	0	0	0	0
1695	STM1741		putative voltage-gated potassium channel	-0.65209	1.21186	-0.72587	0.687091	0.949477	-0.62501	1.20546	0	0.484	0.122	0.302	1	0	0	0	0	1
2073	STM2135		putative inner membrane protein	-0.6524	1.21028	-0.70348	0.881716	1.046	-0.65455	1.07866	0	0.534	0	0.03	0	0	0	0	0	0
2311	STM2375		putative cytoplasmic protein	-0.6525	1.20977	-0.67109	1.16327	1.18652	-0.6194	1.22955	0	0.508	0	0	0	0	0	0	0	0
4479	PSLT087		conjugative transfer:	-0.65328	1.20578	-0.65631	1.29174	1.24876	-0.61763	1.23714	0	0.512	0	0	0	0	0	0	0	0
2791	STM2886	sicA	surface presentation of antigens; secretory proteins	-0.65349	1.20471	-0.75345	0.447352	0.826029	-0.67645	0.984647	0	0.427	0.315	0.2	1	1	0	0	1	3
3532	STM3650		putative periplasmic or exported protein	-0.65382	1.20302	-0.67104	1.1637	1.18336	-0.5982	1.32055	0	0.497	0	0.162	0	0	0	0	0	0
1211	STM1249		putative periplasmic protein	-0.65386	1.20281	-0.53564	2.34066	1.77174	-0.48201	1.81932	0	0.422	0	0.14	0	0	0	0	0	0
11	STM0011	yaaI	putative periplasmic protein	-0.65399	1.20215	-0.55565	2.16673	1.68444	-0.52519	1.63396	0	0.498	0.813	0	0	0	0	0	0	0
3960	STM4103		putative cytoplasmic protein	-0.65403	1.20194	-0.62964	1.52357	1.36276	-0.57163	1.43461	0	0.515	0	0	0	0	0	0	0	0
1622	STM1669		homology to invasin C of Yersinia; intimin	-0.65526	1.19566	-0.62175	1.59215	1.3939	-0.57657	1.4134	0	0.516	0.194	0.067	1	0	0	0	0	1
1342	STM1382	orf408	putative regulatory protein, deoR family	-0.6555	1.19443	-0.804	0.00794627	0.601188	-0.70611	0.857325	0	0.458	0.235	0.243	0	1	0	0	0	1
4505	PSLT013	pefI	plasmid-encoded fimbriae; regulatory	-0.65554	1.19423	-0.65934	1.2654	1.22981	-0.62447	1.20778	0	0.505	0	0	0	0	0	0	0	0
4500	PSLT008	srgC	sdiA-regulated gene;putative bacterial regulatory helix-turn-helix proteins, araC family	-0.65633	1.19019	-0.72322	0.710126	0.950156	-0.65602	1.07235	0	0.464	0.313	0.159	0	0	0	0	0	0
4041	STM4201		putative phage tail protein	-0.65719	1.18579	-0.69032	0.996109	1.09095	-0.62926	1.18722	0	0.467	0	0.11	1	0	0	0	0	1
4380	STM4547	yjjQ	putative transcriptional regulator (LuxR/UhpA family)	-0.65749	1.18426	-0.7861	0.163542	0.673899	-0.70335	0.869173	0	0.436	0.668	0.116	1	0	0	0	1	2
990	STM1020		Gifsy-2 prophage	-0.65755	1.18395	-0.69624	0.944649	1.0643	-0.64007	1.14082	0	0.523	0	0	0	0	0	0	0	0
4455	PSLT057		putative cytoplasmic protein	-0.65801	1.1816	-0.5979	1.79947	1.49053	-0.57338	1.4271	0	0.542	0	0.119	0	0	0	0	0	0
3346	STM3461		putative cytoplasmic protein	-0.65888	1.17715	-0.74599	0.512198	0.844674	-0.69367	0.910727	0	0.469	0.621	0.204	0	0	0	0	0	0
4332	STM4499	yeeN	putative cytoplasmic protein	-0.65907	1.17618	-0.8486	-0.379739	0.39822	-0.72556	0.773832	0	0.389	0.942	0.349	1	0	0	0	0	1
751	STM0777		putative inner membrane protein	-0.65944	1.17429	-0.64945	1.35137	1.26283	-0.61577	1.24513	0	0.469	0	0	0	0	0	0	0	0
14	STM0014		putative transcriptional regulator, LysR family	-0.66005	1.17117	-0.72804	0.668228	0.919699	-0.64049	1.13901	0	0.407	0.241	0	1	0	0	0	0	1
547	STM0559	rfbI	putative glycosyl translocase	-0.66033	1.16974	-0.70091	0.904055	1.0369	-0.65829	1.0626	0	0.467	0.817	0	0	0	0	0	0	0
4385	STM4552		putative inner membrane protein	-0.66047	1.16902	-0.62212	1.58894	1.37898	-0.5893	1.35876	0	0.487	0	0	0	1	0	0	0	1
4518	PSLT039	spvB	Salmonella plasmid virulence: hydrophilic protein	-0.66049	1.16892	-0.53112	2.37995	1.77444	-0.50197	1.73364	1	0.518	0	0	1	0	0	0	0	1
3724	STM3849	yieE	putative cytoplasmic protein	-0.66093	1.16667	-0.63876	1.44429	1.30548	-0.60783	1.27921	0	0.532	0.769	0	0	0	0	0	0	0
1790	STM1839		putative periplasmic or exported protein	-0.662	1.1612	-0.74695	0.503853	0.832527	-0.70184	0.875655	0	0.495	0.737	0.263	0	0	0	0	0	0
1564	STM1610	ydcK	putative nucleoside-diphosphate-sugar pyrophosphorylases involved in lipopolysaccharide biosynthesis	-0.66209	1.16074	-0.68182	1.07	1.11537	-0.65784	1.06453	0	0.515	0.663	0.077	0	0	0	0	0	0
336	STM0346		putative outer membrane protein; homologue of ail and ompX	-0.6621	1.16069	-0.7344	0.612944	0.886817	-0.66959	1.01409	0	0.416	0.362	0.172	0	0	0	0	0	0
1336	STM1376	lppB	putative methyl-accepting chemotaxis protein	-0.66227	1.15982	-0.76973	0.305838	0.732829	-0.71597	0.814999	0	0.473	0.785	0.215	0	0	0	0	0	0
1516	STM1562		putative periplasmic transport protein	-0.66298	1.15619	-0.64317	1.40596	1.28108	-0.60396	1.29582	0	0.45	0.431	0.11	0	0	0	0	0	0
737	STM0762		fumarate hydratase, alpha subunit	-0.66347	1.15369	-0.82348	-0.161384	0.496151	-0.7282	0.7625	0	0.409	0.295	0.06	1	0	0	0	0	1
4151	STM4312		putative phage protein	-0.66387	1.15164	-0.57676	1.98323	1.56743	-0.55064	1.52471	0	0.506	0	0	0	0	0	0	0	0
2782	STM2877	iagB	cell invasion protein	-0.66387	1.15164	-0.77391	0.269503	0.710572	-0.7104	0.83891	0	0.415	0.312	0.175	0	1	0	0	0	1
647	STM0660		putative cytoplasmic protein	-0.66401	1.15093	-0.58007	1.95446	1.55269	-0.55321	1.51368	0	0.541	0	0	0	0	0	0	0	0
4507	PSLT015	orf5	putative outer membrane protein	-0.66402	1.15087	-0.61607	1.64153	1.3962	-0.58032	1.3973	0	0.503	0	0.065	0	0	0	0	0	0
3665	STM3785		putative regulatory protein, gntR family	-0.66407	1.15062	-0.76434	0.352691	0.751654	-0.66552	1.03157	0	0.409	0.279	0.105	1	0	0	0	0	1
1352	STM1392	ssrA	Secretion system regulator:Sensor component	-0.66446	1.14862	-0.66273	1.23593	1.19228	-0.61006	1.26964	0	0.425	0.174	0	1	1	1	1	1	5
739	STM0764		transcriptional regulator, lysR family	-0.66461	1.14786	-0.7934	0.100087	0.623972	-0.7083	0.847924	0	0.396	0.275	0	0	0	0	0	0	0
470	STM0480	ybaM	putative inner membrane protein	-0.66508	1.14545	-0.71356	0.794095	0.969775	-0.66443	1.03625	0	0.455	0.691	0	0	0	1	0	0	1
1496	STM1541		putative regulatory protein, gntR family	-0.66516	1.14505	-0.76887	0.313314	0.72918	-0.66623	1.02852	0	0.472	0.266	0.167	0	0	0	0	0	0
4361	STM4528		putative inner membrane protein	-0.66528	1.14443	-0.75001	0.477254	0.810843	-0.67908	0.973357	0	0.498	0	0	0	0	0	0	0	0
3089	STM3191		putative arylsulfate sulfotransferase	-0.66569	1.14234	-0.66977	1.17474	1.15854	-0.62298	1.21418	0	0.495	0.072	0	0	1	0	0	0	1
2033	STM2094	rfbC	dTDP-4,deoxyrhamnose 3,5 epimerase	-0.66589	1.14131	-0.82127	-0.142173	0.49957	-0.72466	0.777696	0	0.403	0.639	0	1	0	1	0	0	2
2574	STM2655		putative cytoplasmic protein	-0.66599	1.1408	-0.59527	1.82233	1.48157	-0.5698	1.44246	0	0.497	0	0	0	1	0	0	0	1
2522	STM2593		Gifsy-1 prophage: similar to phage tail component M	-0.66609	1.14029	-0.74489	0.52176	0.831026	-0.68202	0.960736	0	0.486	0	0.156	0	0	0	0	0	0
4331	STM4498		putative inner membrane protein	-0.66615	1.13998	-0.62386	1.57381	1.3569	-0.58625	1.37185	0	0.495	0	0	0	0	0	0	0	0
668	STM0688	ybfN	putative lipoprotein	-0.66645	1.13845	-0.57895	1.96419	1.55132	-0.57533	1.41872	0	0.53	0.818	0	0	0	0	0	0	0
973	STM1003		putative transcriptional regulator, Lrp family	-0.66652	1.13809	-0.84146	-0.317675	0.410209	-0.75892	0.630628	0	0.431	0.276	0	1	1	0	0	0	2
3199	STM3306	nlp	regulatory factor of maltose metabolism; similar to Ner repressor protein of phage Mu	-0.66678	1.13676	-0.71847	0.751415	0.94409	-0.66379	1.03899	0	0.495	0.842	0	0	0	0	0	0	0
3595	STM3714	rfaK	putative hexose transferase, lipopolysaccharide core biosynthesis	-0.66682	1.13656	-0.72191	0.721513	0.929036	-0.63522	1.16163	0	0.412	0.163	0.165	1	0	1	0	1	3
327	STM0337	stbD	putative fimbriae; usher	-0.66689	1.1362	-0.66701	1.19873	1.16747	-0.61444	1.25084	0	0.522	0.023	0.041	1	0	0	0	0	1
1112	STM1146	ymdA	putative periplasmic protein	-0.66689	1.1362	-0.73371	0.618942	0.877572	-0.68528	0.946742	0	0.478	0.396	0.142	0	0	0	0	0	0
1468	STM1513		putative cytoplasmic protein	-0.66704	1.13544	-0.69464	0.958557	1.047	-0.66619	1.02869	0	0.5	0.683	0.267	0	1	0	0	0	1
373	STM0383	yaiB	putative cytoplasmic protein	-0.66709	1.13518	-0.68953	1.00298	1.06908	-0.65795	1.06406	0	0.47	0.83	0	0	0	0	0	0	0
2307	STM2371	flk	Couples flagellar P- and L-ring assembly to flagellar morphogenesis; cell division	-0.66712	1.13503	-0.54728	2.23948	1.68725	-0.52631	1.62915	0	0.552	0.571	0.204	0	0	0	0	0	0
3657	STM3777		putative cytoplasmic protein	-0.66745	1.13334	-0.65787	1.27818	1.20576	-0.61046	1.26792	0	0.468	0	0	0	0	0	0	0	0
2847	STM2942		putative transposase	-0.66762	1.13247	-0.68761	1.01967	1.07607	-0.64995	1.0984	0	0.484	0	0	0	0	0	0	0	0
4038	STM4198		putative cytoplasmic protein	-0.66851	1.12792	-0.69234	0.97855	1.05324	-0.65533	1.07531	0	0.554	0	0	0	0	0	0	1	1
2796	STM2891	spaO	surface presentation of antigens; secretory proteins	-0.66875	1.12669	-0.61668	1.63622	1.38146	-0.57509	1.41975	0	0.528	0	0	1	1	0	0	1	3
831	STM0859		putative transcriptional regulator, LysR family	-0.66895	1.12567	-0.79616	0.0760954	0.600883	-0.68893	0.931074	0	0.402	0.253	0	1	0	0	1	0	2
740	STM0765		putative cation transporter	-0.66899	1.12547	-0.86667	-0.536812	0.294327	-0.77121	0.577871	0	0.381	0.193	0.193	0	0	0	0	1	1
2800	STM2895	invB	surface presentation of antigens; secretory proteins	-0.66931	1.12383	-0.64947	1.3512	1.23751	-0.61281	1.25783	0	0.44	0	0	0	1	0	0	0	1
3955	STM4098		putative arylsulfate sulfotransferase	-0.66941	1.12332	-0.68079	1.07895	1.10113	-0.6372	1.15314	0	0.48	0	0	1	0	1	0	0	2
1587	STM1633		putative periplasmic binding protein	-0.66981	1.12127	-0.73871	0.575479	0.848377	-0.64471	1.1209	0	0.396	0.245	0.15	1	0	0	0	0	1
1519	STM1565	rpsV	30S ribosomal subunit protein S22	-0.67002	1.1202	-0.56279	2.10466	1.61243	-0.56029	1.48329	0	0.51	0.809	0	0	1	0	0	0	1
3356	STM3471	yhfG	putative cytoplasmic protein	-0.67053	1.11759	-0.60005	1.78078	1.44919	-0.59832	1.32004	0	0.515	0.8	0	0	0	0	0	0	0
754	STM0780		putative outer membrane or exported	-0.67103	1.11504	-0.72246	0.716732	0.915885	-0.68569	0.944982	0	0.47	0.898	0	0	0	0	0	0	0
576	STM0589	fepE	ferric enterobactin (enterochelin) transporter	-0.67118	1.11427	-0.73548	0.603556	0.858913	-0.67801	0.97795	0	0.489	0.725	0.135	1	0	0	0	0	1
1891	STM1940		putative cell wall-associated hydrolase	-0.67123	1.11401	-0.6642	1.22316	1.16859	-0.6271	1.19649	0	0.484	0	0	0	0	0	0	0	0
2178	STM2241	sspH-2	Leucine-rich repeat protein, induced by the SPI-2 regulator ssrA/B	-0.67199	1.11013	-0.6712	1.16231	1.13622	-0.62283	1.21482	1	0.554	0	0.132	0	1	0	0	0	1
3090	STM3192		putative arylsulfate sulfotransferase	-0.67219	1.10911	-0.79974	0.0449763	0.577042	-0.73263	0.743483	0	0.486	0	0	1	0	0	0	0	1
3016	STM3118		putative acetyl-CoA hydrolase	-0.67292	1.10538	-0.73676	0.59243	0.848902	-0.63716	1.15331	0	0.453	0.265	0.172	0	0	0	1	0	1
4279	STM4444		putative inner membrane protein	-0.67334	1.10323	-0.60947	1.6989	1.40106	-0.5983	1.32012	0	0.556	0	0	0	0	0	0	0	0
37	STM0037		putative cytoplasmic protein	-0.67336	1.10313	-0.66008	1.25897	1.18105	-0.61502	1.24835	0	0.5	0	0.118	0	0	0	0	1	1
4312	STM4478		putative cytoplasmic protein	-0.6735	1.10241	-0.64448	1.39457	1.24849	-0.61611	1.24367	0	0.555	0	0	0	0	0	0	0	0
1557	STM1603	yncJ	putative periplasmic protein	-0.67408	1.09945	-0.6988	0.922397	1.01092	-0.68862	0.932405	0	0.517	0.737	0.145	0	0	0	0	0	0
2232	STM2296	ais	aluminum inducible protein	-0.67413	1.09919	-0.69917	0.91918	1.00919	-0.67055	1.00997	0	0.476	0.662	0.169	0	0	0	0	0	0
1020	STM1050		Gifsy-2 prophage; tail fiber assembly like-protein	-0.67473	1.09612	-0.7644	0.352169	0.724146	-0.71261	0.829423	0	0.485	0.627	0.14	1	0	0	0	0	1
24	STM0024	bcfD	fimbrial subunit	-0.67592	1.09004	-0.67523	1.12728	1.10866	-0.63939	1.14373	0	0.501	0.427	0.125	1	0	0	0	0	1
2548	STM2620		Gifsy-1 prophage	-0.67603	1.08948	-0.69605	0.946301	1.01789	-0.66158	1.04848	0	0.533	0	0	0	0	1	0	0	1
869	STM0898		Fels-1 prophage; redicted transcriptional regulator	-0.67647	1.08723	-0.79871	0.0539296	0.570578	-0.72863	0.760654	0	0.426	0.147	0.143	0	0	0	0	0	0
642	STM0655	ybeR	putative cytoplasmic protein	-0.67666	1.08626	-0.60458	1.7414	1.41383	-0.59078	1.3524	0	0.53	0.63	0.089	0	0	0	0	0	0
3150	STM3254		putative fructose-1-phosphate kinase	-0.67777	1.08058	-0.77714	0.241427	0.661004	-0.67317	0.998727	0	0.432	0.28	0.168	0	0	0	0	0	0
1822	STM1870		Homology to recE (exoVIII) in E. coli	-0.67783	1.08027	-0.63372	1.4881	1.28419	-0.61734	1.23839	0	0.522	0.341	0.22	0	0	0	0	0	0
920	STM0948		putative cytoplasmic protein	-0.67796	1.07961	-0.70483	0.869981	0.974795	-0.66577	1.03049	0	0.504	0	0.113	0	0	0	0	0	0
1348	STM1388	orf70	putative cytoplasmic protein	-0.67829	1.07792	-0.62622	1.5533	1.31561	-0.62615	1.20057	0	0.524	0.857	0	0	0	1	0	0	1
3225	STM3332	yhcG	putative cytoplasmic protein	-0.67829	1.07792	-0.6575	1.2814	1.17966	-0.60803	1.27835	0	0.498	0.749	0.054	0	0	0	0	0	0
2949	STM3050	yqfB	putative cytoplasmic protein	-0.67878	1.07542	-0.70772	0.84486	0.960139	-0.66464	1.03534	0	0.453	0.883	0.165	0	0	0	0	0	0
379	STM0389	yaiA	putative cytoplasmic protein	-0.67879	1.07537	-0.57928	1.96132	1.51835	-0.56838	1.44856	0	0.524	0.921	0	0	0	0	0	0	0
4472	PSLT079	traE	conjugative transfer: assembly	-0.67884	1.07511	-0.68524	1.04027	1.05769	-0.65392	1.08136	0	0.489	0	0.144	1	0	0	0	0	1
3926	STM4069		putative periplasmic protein	-0.68011	1.06862	-0.4837	2.79215	1.93039	-0.47389	1.85418	0	0.573	0	0	0	0	0	0	0	0
843	STM0871	ybjM	putative inner membrane protein	-0.68024	1.06795	-0.581	1.94637	1.50716	-0.57947	1.40095	0	0.515	0.736	0	0	0	0	0	0	0
2168	STM2231		homologue of msgA; ssrB-regulated factor	-0.68042	1.06703	-0.75479	0.435704	0.751369	-0.72712	0.767136	0	0.479	0.281	0.208	0	0	0	0	0	0
2367	STM2438	yfeK	putative periplasmic protein	-0.68063	1.06596	-0.66671	1.20134	1.13365	-0.65559	1.07419	0	0.495	0.794	0.111	0	0	0	0	0	0
2699	STM2789		putative cytoplasmic protein	-0.68091	1.06453	-0.64098	1.425	1.24476	-0.63761	1.15138	0	0.539	0.866	0	0	0	0	0	0	0
1108	STM1142	csgD	putative transcriptional regulator (LuxR/UhpA family)	-0.6819	1.05947	-0.82269	-0.154516	0.452476	-0.73966	0.713305	0	0.408	0.921	0	1	1	0	0	1	3
3521	STM3639	lpfB	long polar fimbrial chaperone	-0.68193	1.05931	-0.72056	0.733248	0.896281	-0.66131	1.04964	0	0.448	0.384	0.138	0	0	0	0	0	0
57	STM0057		putative citrate-sodium symport	-0.68205	1.0587	-0.69041	0.995327	1.02701	-0.65007	1.09789	0	0.494	0	0	0	0	0	0	0	0
3600	STM3719	rfaB	UDP-D-galactose:(glucosyl)lipopolysaccharide-1,6-D-galactosyltransferase	-0.68223	1.05778	-0.76841	0.317312	0.687546	-0.69073	0.923347	0	0.396	0.641	0.159	1	0	1	0	1	3
1286	STM1325	ydiZ	putative cytoplasmic protein	-0.68235	1.05717	-0.59505	1.82424	1.44071	-0.58631	1.37159	0	0.49	0.677	0	0	0	0	0	0	0
280	STM0287		putative periplasmic protein	-0.68307	1.05349	-0.7093	0.831125	0.942306	-0.68948	0.928713	0	0.478	0	0.138	0	1	0	0	0	1
4276	STM4441		putative cytoplasmic protein	-0.68318	1.05292	-0.68711	1.02401	1.03847	-0.68737	0.937771	0	0.586	0.175	0.133	0	0	0	0	0	0
2886	STM2983	ygdI	putative lipoprotein	-0.68428	1.0473	-0.73812	0.580608	0.813954	-0.70792	0.849556	0	0.458	0.92	0	0	0	0	0	0	0
2412	STM2484		putative inner membrane protein	-0.68438	1.04679	-0.73116	0.641108	0.843949	-0.70812	0.848697	0	0.46	0	0	0	0	0	0	0	0
3411	STM3528		putative periplasmic phosphate-binding protein	-0.68478	1.04474	-0.58889	1.87779	1.46127	-0.57616	1.41516	0	0.51	0.108	0	0	0	0	0	0	0
2647	STM2736		Fels-2 prophage: similar to retron in E coli and to protein cII of phages	-0.685	1.04362	-0.66473	1.21855	1.13108	-0.65166	1.09106	0	0.538	0	0.101	0	0	0	0	0	0
3534	STM3652		putative cytoplasmic protein	-0.68527	1.04224	-0.79679	0.0706192	0.556429	-0.75299	0.656084	0	0.477	0	0	0	0	0	0	0	0
1316	STM1355	ydiP	putative transcription regulator, AraC family	-0.68548	1.04117	-0.72809	0.667793	0.85448	-0.67498	0.990957	0	0.427	0.797	0.118	0	0	0	0	0	0
878	STM0906		Fels-1 prophage	-0.68615	1.03774	-0.61761	1.62814	1.33294	-0.59664	1.32725	0	0.497	0.184	0.175	0	0	0	0	0	0
828	STM0856		putative electron transfer flavoprotein alpha subunit	-0.6863	1.03697	-0.72783	0.670054	0.853514	-0.62651	1.19902	0	0.415	0.279	0.521	1	0	0	0	0	1
4208	STM4373	yjfK	putative cytoplasmic protein	-0.68643	1.03631	-0.6627	1.2362	1.13625	-0.63236	1.17391	0	0.51	0.775	0	0	0	0	0	0	0
734	STM0759	ybgS	putative homeobox protein	-0.68647	1.03611	-0.61357	1.66326	1.34968	-0.61985	1.22761	0	0.495	0.781	0.109	0	0	0	0	0	0
1232	STM1271	yeaR	putative cytoplasmic protein	-0.6874	1.03135	-0.63161	1.50645	1.2689	-0.60429	1.29441	0	0.5	0.825	0.208	1	0	0	0	0	1
1119	STM1153	msyB	acidic protein suppresses mutants lacking function of protein export	-0.68774	1.02961	-0.63376	1.48776	1.25868	-0.6425	1.13038	0	0.524	0.927	0	0	0	0	0	0	0
1010	STM1040		Gifsy-2 prophage; probable minor tail protein	-0.68811	1.02772	-0.65631	1.29174	1.15973	-0.64808	1.10643	0	0.538	0	0.128	0	0	0	0	0	0
781	STM0808	ybhM	putative integral membrane protein	-0.68842	1.02614	-0.67204	1.15501	1.09057	-0.64003	1.14099	0	0.438	0.251	0.17	0	1	0	0	1	2
4494	PSLT103	traT	conjugative transfer: surface exclusion	-0.68854	1.02552	-0.61746	1.62944	1.32748	-0.60792	1.27883	0	0.502	0	0.119	0	0	0	0	0	0
3505	STM3623	yhjT	putative inner membrane protein	-0.6888	1.02419	-0.64288	1.40848	1.21634	-0.65302	1.08522	0	0.497	0.794	0	0	0	0	0	0	0
4103	STM4263	yjcB	putative inner membrane protein	-0.68881	1.02414	-0.61266	1.67117	1.34766	-0.61764	1.2371	0	0.537	0.839	0	0	0	0	0	0	0
2828	STM2923		putative cytoplasmic protein	-0.68902	1.02307	-0.71817	0.754023	0.888546	-0.69676	0.897462	0	0.53	0	0	0	0	0	0	0	0
4325	STM4492		putative cytoplasmic protein	-0.68924	1.02194	-0.76872	0.314617	0.668281	-0.73769	0.721762	0	0.509	0	0	0	0	1	0	0	1
3025	STM3127		putative cytoplasmic protein	-0.68969	1.01964	-0.7098	0.826779	0.923212	-0.68165	0.962325	0	0.492	0.21	0.226	1	0	0	0	0	1
3908	STM4051		putative outer membrane protein	-0.69006	1.01775	-0.74926	0.483773	0.750763	-0.71457	0.821009	0	0.422	0.233	0.123	1	0	0	0	0	1
2526	STM2597		Gifsy-1 prophage: similar to major tail protein	-0.69021	1.01699	-0.75625	0.423013	0.719999	-0.74501	0.690339	0	0.562	0	0.129	1	0	0	0	0	1
1213	STM1251		putative molecular chaperone (small heat shock protein)	-0.69104	1.01274	-0.83912	-0.297334	0.357704	-0.7616	0.619123	0	0.456	0.29	0.174	0	0	0	0	0	0
1109	STM1143	csgB	minor curlin subunit precursor, nucleator for assembly of adhesive surface organelles	-0.6911	1.01244	-0.85034	-0.394864	0.308786	-0.80562	0.430159	0	0.435	0.821	0.199	0	0	0	0	0	0
2842	STM2937	ygbF	putative inner membrane protein	-0.69126	1.01162	-0.69273	0.97516	0.993389	-0.66933	1.01521	0	0.493	0.806	0	0	0	0	0	0	0
211	STM0211	yaeH	putative cytoplasmic protein	-0.69135	1.01116	-0.70926	0.831473	0.921315	-0.69643	0.898879	0	0.469	0.953	0.266	0	0	0	0	0	0
2446	STM2518	yfgJ	putative cytoplasmic protein	-0.69154	1.01019	-0.76299	0.364425	0.687306	-0.74162	0.704892	0	0.484	0.616	0.219	0	0	0	0	0	0
4404	STM4574		putative outer membrane protein	-0.6929	1.00323	-0.71933	0.74394	0.873587	-0.68982	0.927253	0	0.479	0.345	0	0	0	0	0	0	0
4368	STM4535		putative PTS permease	-0.69295	1.00298	-0.76516	0.345563	0.67427	-0.72737	0.766063	0	0.457	0.186	0.171	1	0	0	0	0	1
3504	STM3622	yhjS	putative cytoplasmic protein	-0.69345	1.00042	-0.62947	1.52505	1.26273	-0.61466	1.24989	0	0.531	0.801	0	0	0	0	0	0	0
4463	PSLT067		putative cytoplasmic protein	-0.69394	0.997917	-0.55386	2.18229	1.5901	-0.54144	1.5642	0	0.558	0.487	0	0	0	0	0	0	0
4475	PSLT082	traP	conjugative transfer	-0.69424	0.996383	-0.70855	0.837645	0.917014	-0.70333	0.869259	0	0.517	0	0.101	0	0	0	0	0	0
1354	STM1394	ssaC	Secretion system apparatus	-0.69452	0.994952	-0.77553	0.255422	0.625187	-0.73069	0.751811	0	0.423	0.189	0.05	1	1	1	0	1	4
4209	STM4374	yjfL	putative inner membrane protein	-0.69478	0.993623	-0.80011	0.0417601	0.517691	-0.75132	0.663252	0	0.47	0.902	0.182	0	0	0	0	0	0
1225	STM1264	aadA	Aminoglycoside adenyltransferase	-0.69479	0.993572	-0.62667	1.54939	1.27148	-0.61599	1.24418	0	0.546	0	0.111	0	0	0	0	0	0
2090	STM2152	stcA	paral putative fimbrial-like protein	-0.69544	0.990249	-0.69356	0.967945	0.979097	-0.66166	1.04814	0	0.426	0.341	0.136	0	0	0	0	0	0
1382	STM1422	ssaU	Secretion system apparatus: homology with YscU of the secretion system of Yersinia	-0.69593	0.987744	-0.85656	-0.448931	0.269406	-0.77315	0.569543	0	0.397	0.312	0	1	1	1	0	0	3
1206	STM1241	msgA	Macrophage survival gene; reduced mouse virulence	-0.69599	0.987437	-0.78354	0.185795	0.586616	-0.74054	0.709528	0	0.464	0.316	0.291	0	0	0	0	0	0
3897	STM4041		putative inner membrane protein	-0.69632	0.98575	-0.65481	1.30478	1.14526	-0.6486	1.1042	0	0.548	0	0	0	0	0	0	0	0
1380	STM1420	ssaS	Secretion system apparatus: homology with YscS of the secretion system of Yersinia	-0.69643	0.985188	-0.81686	-0.103839	0.440674	-0.76096	0.621871	0	0.421	0.227	0	0	1	1	0	0	2
3569	STM3688		putative cytoplasmic protein	-0.69647	0.984983	-0.61114	1.68438	1.33468	-0.60123	1.30754	0	0.493	0	0.275	0	0	0	0	0	0
1005	STM1035		Gifsy-2 prophage; ATP-binding sugar transporter-like protein	-0.69675	0.983552	-0.71721	0.762368	0.87296	-0.69938	0.886215	0	0.525	0	0.242	0	0	0	0	0	0
1013	STM1043		Gifsy-2 prophage; attachment and invasion protein homolog	-0.69679	0.983347	-0.79258	0.107215	0.545281	-0.74155	0.705192	0	0.443	0.309	0	0	0	0	0	1	1
2431	STM2503		putative diguanylate cyclase	-0.69692	0.982683	-0.695	0.955428	0.969055	-0.67739	0.980612	0	0.477	0.729	0.03	0	0	0	0	1	1
2706	STM2796	yqaE	putative YqaE family transport protein	-0.69692	0.982683	-0.78672	0.158153	0.570418	-0.75356	0.653637	0	0.43	0.923	0.231	1	0	0	0	0	1
1821	STM1869A		putative protein	-0.69754	0.979513	-0.57628	1.9874	1.48346	-0.57292	1.42907	0	0.53	0	0	0	0	0	0	0	0
4323	STM4490		putative Mrr restriction endonuclease	-0.69761	0.979155	-0.73185	0.63511	0.807132	-0.70366	0.867842	0	0.502	0.134	0.076	1	0	0	0	0	1
4403	STM4573	stjC	putative fimbrial chaparone protein	-0.6981	0.97665	-0.68838	1.01297	0.994811	-0.62717	1.19619	0	0.457	0.46	0.128	0	0	0	0	0	0
3954	STM4097		putative outer membrane lipoprotein	-0.69815	0.976395	-0.63153	1.50714	1.24177	-0.61465	1.24994	0	0.495	0	0.082	0	0	0	0	0	0
1818	STM1868	mig-3	Homology to phage-tail assembly proteins	-0.69883	0.972918	-0.66463	1.21942	1.09617	-0.65478	1.07767	0	0.507	0.317	0.109	1	1	0	0	0	2
4519	PSLT040	spvA	Salmonella plasmid virulence: outer membrane protein	-0.69911	0.971487	-0.49421	2.70079	1.83614	-0.5112	1.69402	0	0.542	0	0.125	1	0	0	0	0	1
356	STM0366	yahO	putative periplasmic protein	-0.6997	0.968471	-0.81785	-0.112445	0.428013	-0.7856	0.516099	0	0.444	0.725	0.176	0	0	0	0	0	0
1784	STM1833		putative inner membrane protein	-0.69972	0.968369	-0.7318	0.635544	0.801956	-0.71507	0.818863	0	0.449	0.859	0.141	0	1	0	0	0	1
1802	STM1851		putative cytoplasmic protein	-0.69995	0.967193	-0.61646	1.63814	1.30266	-0.62158	1.22019	0	0.51	0.873	0.19	1	1	0	0	0	2
3637	STM3757	misL	putative autotransported protein	-0.70012	0.966324	-0.72594	0.686482	0.826403	-0.70475	0.863163	0	0.531	0.252	0.073	0	0	0	0	1	1
1088	STM1121	ymdF	putative cytoplasmic protein	-0.70022	0.965812	-0.68356	1.05487	1.01034	-0.68326	0.955414	0	0.521	0.727	0.291	0	0	0	0	0	0
2180	STM2243		putative tail fiber protein of phage	-0.70036	0.965097	-0.616	1.64214	1.30362	-0.59757	1.32325	0	0.54	0.106	0.106	0	0	0	0	0	0
2279	STM2343		putative cytoplasmic protein	-0.70085	0.962592	-0.72586	0.687178	0.824885	-0.69114	0.921587	0	0.474	0.278	0.189	0	0	0	0	0	0
4492	PSLT101	traG	conjugative transfer: assembly abd aggregate stability	-0.70134	0.960087	-0.74024	0.56218	0.761133	-0.7166	0.812295	0	0.52	0	0	1	0	0	0	0	1
2100	STM2161		putative inner membrane protein	-0.70138	0.959882	-0.61793	1.62536	1.29262	-0.64258	1.13004	0	0.551	0	0	0	0	0	0	0	0
4338	STM4505		putative inner membrane or exported	-0.70187	0.957377	-0.76182	0.374596	0.665987	-0.72696	0.767823	0	0.495	0.059	0.098	0	1	0	0	0	1
68	STM0068	caiF	transcriptional regulator of cai and fix operon	-0.70194	0.957019	-0.72607	0.685352	0.821186	-0.71939	0.800318	0	0.466	0.763	0.137	0	0	0	0	0	0
263	STM0271		putative cytoplasmic protein	-0.70213	0.956048	-0.69137	0.986982	0.971515	-0.70859	0.846679	0	0.521	0	0.137	0	0	1	0	0	1
3778	STM3911		putative inner membrane protein	-0.70232	0.955077	-0.72837	0.66536	0.810218	-0.70501	0.862047	0	0.544	0.49	0	0	0	0	0	0	0
4278	STM4443		putative inner membrane protein	-0.70237	0.954821	-0.62114	1.59746	1.27614	-0.63403	1.16674	0	0.568	0.05	0	0	0	0	0	0	0
2158	STM2220	yejG	putative cytoplasmic protein	-0.70257	0.953799	-0.67767	1.10607	1.02993	-0.67019	1.01152	0	0.523	0.912	0	1	0	0	0	0	1
3658	STM3778		putative helix-turn-helix protein	-0.70274	0.95293	-0.75494	0.4344	0.693665	-0.73196	0.746359	0	0.483	0.271	0.243	0	0	0	0	0	0
2174	STM2237		putative inner membrane protein	-0.70322	0.950476	-0.69109	0.989416	0.969946	-0.67972	0.97061	0	0.523	0	0	0	0	0	0	0	0
3284	STM3392	yhdV	putative outer membrane lipoprotein	-0.70336	0.94976	-0.63459	1.48054	1.21515	-0.65179	1.0905	0	0.498	0.986	0	0	0	0	0	0	0
1792	STM1841		putative outer membrane or exported	-0.70343	0.949402	-0.68884	1.00897	0.979188	-0.69719	0.895616	0	0.527	0	0	0	0	0	0	0	0
1682	STM1728	yciG	putative cytoplasmic protein	-0.70396	0.946693	-0.69053	0.994284	0.970488	-0.68949	0.92867	0	0.511	0.683	0.25	1	0	0	0	0	1
4297	STM4463		putative arginine repressor	-0.70409	0.946028	-0.75665	0.419536	0.682782	-0.73035	0.75327	0	0.48	0.278	0.173	0	0	0	0	0	0
2778	STM2873	prgI	cell invasion protein; cytoplasmic	-0.70478	0.942501	-0.73459	0.611292	0.776897	-0.71937	0.800404	0	0.463	0	0.2	0	0	1	0	0	1
848	STM0876	ybjN	putative cytoplasmic protein	-0.70501	0.941325	-0.62472	1.56634	1.25383	-0.62737	1.19533	0	0.502	0.848	0.158	0	0	0	0	0	0
574	STM0587	ybdZ	putative cytoplasmic protein	-0.70531	0.939791	-0.67474	1.13154	1.03566	-0.65206	1.08935	0	0.55	0	0.167	0	0	0	0	0	0
1464	STM1509	ydfZ	putative cytoplasmic protein	-0.70533	0.939689	-0.65987	1.2608	1.10024	-0.66439	1.03642	0	0.512	0.791	0.239	0	0	0	0	0	0
4258	STM4423		putative AraC-type DNA-binding domain-containing protein	-0.70587	0.936929	-0.73647	0.59495	0.765939	-0.67791	0.978379	0	0.442	0.252	0.128	0	0	0	0	0	0
2608	STM2696		Fels-2 prophage: similar to genes in phage phiCTX	-0.70598	0.936366	-0.71979	0.739941	0.838154	-0.7082	0.848354	0	0.536	0	0.143	0	0	0	0	0	0
1575	STM1621		putative periplasmic protein	-0.70619	0.935293	-0.83041	-0.221622	0.356835	-0.77017	0.582335	0	0.424	0.33	0.115	0	1	1	0	0	2
4333	STM4500	yjhP	putative SAM-dependent methyltransferase	-0.70623	0.935088	-0.64471	1.39257	1.16383	-0.65335	1.08381	0	0.545	0.374	0.103	0	0	0	0	0	0
2545	STM2617		Gifsy-1 prophage: similar to antiterminator Q	-0.70661	0.933146	-0.67428	1.13554	1.03434	-0.68126	0.963999	0	0.514	0	0.076	0	0	0	0	0	0
2309	STM2373		putative cytoplasmic protein	-0.70676	0.932379	-0.65442	1.30817	1.12027	-0.64781	1.10759	0	0.513	0	0.153	1	0	0	0	0	1
1006	STM1036		Gifsy-2 prophage; probable minor tail protein	-0.70713	0.930487	-0.73857	0.576696	0.753592	-0.72986	0.755374	0	0.514	0	0.112	0	0	0	0	0	0
2441	STM2513	shdA	similar to the C-terminal region of AIDA; IcsA; subspecies I specific; Peyer's patch colonization and shedding factor	-0.7073	0.929618	-0.55899	2.13769	1.53366	-0.56253	1.47367	0	0.581	0.114	0.125	0	0	0	0	0	0
1655	STM1701	yciW	putative cytoplasmic protein	-0.70756	0.928289	-0.56394	2.09467	1.51148	-0.57864	1.40452	0	0.559	0.515	0.092	0	0	0	0	0	0
3508	STM3625	yhjV	putative HAAAP family transport protein	-0.70792	0.926449	-0.79307	0.102955	0.514702	-0.75008	0.668575	0	0.439	0.85	0.127	0	0	0	0	0	0
2776	STM2871	prgK	cell invasion protein; lipoprotein, may link inner and outer membranes	-0.70803	0.925886	-0.76094	0.382245	0.654066	-0.71343	0.825903	0	0.456	0.139	0.099	1	1	0	0	1	3
4150	STM4310		putative inner membrane protein	-0.70819	0.925068	-0.75412	0.441528	0.683298	-0.74451	0.692486	0	0.467	0.322	0.153	1	0	0	0	0	1
4452	PSLT052	parA	plasmid partition protein A	-0.7082	0.925017	-0.76538	0.34365	0.634334	-0.73116	0.749793	0	0.469	0	0	0	0	0	0	0	0
38	STM0038		putative arylsulfatase	-0.70857	0.923126	-0.58971	1.87066	1.39689	-0.58414	1.38091	0	0.497	0	0	0	0	0	0	0	0
1619	STM1665		putative cytoplasmic protein	-0.70879	0.922001	-0.68767	1.01914	0.970573	-0.67462	0.992502	0	0.542	0	0.145	0	0	0	0	0	0
16	STM0016		putative protein	-0.7102	0.914793	-0.63965	1.43656	1.17568	-0.63331	1.16983	0	0.51	0	0.113	1	0	0	0	0	1
2329	STM2393	yfdC	putative transport	-0.71089	0.911265	-0.69124	0.988112	0.949689	-0.67192	1.00409	0	0.497	0.847	0.182	1	0	0	0	0	1
2585	STM2671	yfiR	putative periplasmic protein	-0.71103	0.91055	-0.70906	0.833212	0.871881	-0.69794	0.892397	0	0.463	0.651	0	0	0	0	0	0	0
1473	STM1518	marB	multiple antibiotic resistance protein	-0.71106	0.910396	-0.60352	1.75062	1.33051	-0.61552	1.2462	0	0.507	0.437	0	0	1	0	0	0	1
1863	STM1911		putative cytoplasmic protein	-0.71107	0.910345	-0.64416	1.39735	1.15385	-0.62888	1.18885	0	0.527	0	0	0	0	0	0	0	0
1062	STM1094	pipD	Pathogenicity island encoded protein: SPI3	-0.71166	0.907329	-0.71368	0.793052	0.850191	-0.70109	0.878875	0	0.487	0	0	1	0	0	0	0	1
3664	STM3784		putative phosphotransferase system mannitol/fructose-specific IIA domain	-0.71174	0.90692	-0.66945	1.17752	1.04222	-0.63437	1.16528	0	0.442	0.229	0.096	0	0	0	0	1	1
1759	STM1808		putative cytoplasmic protein	-0.71186	0.906307	-0.69986	0.913183	0.909745	-0.68027	0.968249	0	0.519	0.425	0.133	0	0	0	0	0	0
2846	STM2941	yghJ	putative cytoplasmic protein	-0.71254	0.90283	-0.74161	0.550271	0.726551	-0.72502	0.77615	0	0.528	0.273	0.077	0	0	0	0	0	0
2503	STM2575		putative transcriptional regulator, LysR family	-0.71257	0.902677	-0.74842	0.491075	0.696876	-0.6855	0.945798	0	0.43	0.256	0	0	1	0	0	0	1
82	STM0082		putative secreted protein	-0.71272	0.90191	-0.70672	0.853552	0.877731	-0.68578	0.944596	0	0.466	0.333	0.125	1	0	0	0	1	2
3914	STM4057		putative inner membrane protein	-0.71307	0.900121	-0.7232	0.7103	0.80521	-0.72537	0.774648	0	0.549	0	0	0	0	1	0	0	1
463	STM0473	hha	hemolysin expression modulating protein (involved in environmental regulation of virulence factors)	-0.71364	0.897207	-0.78439	0.178406	0.537806	-0.77359	0.567654	0	0.404	0.986	0	0	0	0	0	0	0
4364	STM4531	yjiX	putative cytoplasmic protein	-0.71418	0.894446	-0.87218	-0.584708	0.154869	-0.8317	0.318205	0	0.483	0.94	0.224	0	0	0	0	0	0
3031	STM3133		putative amidohydrolase	-0.71429	0.893884	-0.76613	0.337131	0.615507	-0.7061	0.857368	0	0.438	0.209	0.247	0	0	0	0	0	0
1803	STM1852	yebW	putative inner membrane lipoprotein	-0.71434	0.893628	-0.68346	1.05574	0.974684	-0.6891	0.930344	0	0.482	0.873	0	0	0	0	0	0	0
4459	PSLT062		putative cytoplasmic protein	-0.71435	0.893577	-0.61777	1.62675	1.26016	-0.61931	1.22993	0	0.518	0.319	0.083	0	0	0	0	0	0
3373	STM3489	yrfA	putative inner membrane protein	-0.71442	0.893219	-0.64805	1.36354	1.12838	-0.67621	0.985677	0	0.569	0.617	0.158	0	0	0	0	0	0
1025	STM1056		Gifsy-2 prophage; homologue of msgA	-0.71523	0.889078	-0.7366	0.59382	0.741449	-0.71121	0.835433	0	0.476	0.302	0	0	0	0	0	0	0
1897	STM1949	yecF	putative cytoplasmic protein	-0.71556	0.887391	-0.7204	0.734639	0.811015	-0.72378	0.781473	0	0.487	0.878	0	0	0	0	0	0	0
1488	STM1533		putative hydrogenase	-0.71575	0.88642	-0.5404	2.29929	1.59285	-0.5523	1.51759	0	0.504	0.249	0.076	0	1	0	0	0	1
3519	STM3637	lpfD	long polar fimbrial operon protein	-0.71653	0.882433	-0.7026	0.889365	0.885899	-0.68229	0.959577	0	0.467	0.27	0.117	0	0	0	0	0	0
521	STM0531	ylbF	putative cytoplasmic protein	-0.71679	0.881103	-0.63934	1.43925	1.16018	-0.65868	1.06093	0	0.574	0.654	0	0	0	0	0	0	0
3550	STM3669	yiaL	putative cytoplasmic protein	-0.7169	0.880541	-0.71793	0.756109	0.818325	-0.69052	0.924249	0	0.459	0.825	0.188	0	0	0	0	0	0
295	STM0302	safD	putative fimbriae subunit	-0.7172	0.879007	-0.60514	1.73654	1.30777	-0.63052	1.18181	0	0.549	0	0	0	0	0	0	0	0
4277	STM4442		putative cytoplasmic protein	-0.71817	0.874049	-0.64602	1.38119	1.12762	-0.65617	1.0717	0	0.543	0	0	0	0	0	0	0	0
1492	STM1537		putative Ni/Fe-hydrogenase 1 b-type cytochrome subunit	-0.71818	0.873997	-0.59062	1.86275	1.36837	-0.57516	1.41945	0	0.511	0.494	0	0	0	0	0	0	0
1495	STM1540		putative hydrolase	-0.71859	0.871901	-0.73234	0.63085	0.751376	-0.70176	0.875999	0	0.478	0	0.085	0	0	0	0	1	1
4374	STM4541	mdoB	phosphoglycerol transferase I	-0.71861	0.871799	-0.65441	1.30826	1.09003	-0.67826	0.976877	0	0.535	0.921	0	0	0	0	0	0	0
2332	STM2397	pgtB	Phosphoglycerate transport: protein for signal transmission	-0.71909	0.869345	-0.68959	1.00245	0.9359	-0.67944	0.971812	0	0.539	0.118	0.117	0	0	0	0	0	0
1903	STM1955	fliZ	putative regulator of FliA	-0.71916	0.868988	-0.64564	1.38449	1.12674	-0.65213	1.08905	0	0.495	0.798	0.104	0	0	0	0	0	0
516	STM0526	ylbA	putative glyoxylate utilization	-0.71953	0.867096	-0.70321	0.884063	0.875579	-0.68466	0.949404	0	0.497	0.923	0	0	0	0	0	0	0
976	STM1006		Gifsy-2 prophage; excisionase	-0.71956	0.866943	-0.68248	1.06426	0.9656	-0.68297	0.956658	0	0.5	0.232	0	0	0	0	0	0	0
2628	STM2716		Fels-2 prophage: phage-holin analog protein	-0.71969	0.866278	-0.73733	0.587475	0.726876	-0.73699	0.724767	0	0.512	0	0	0	0	0	0	0	0
2072	STM2134		putative inner membrane protein	-0.72007	0.864335	-0.64919	1.35363	1.10898	-0.67743	0.98044	0	0.574	0	0	0	0	0	0	0	0
638	STM0651		putative permease	-0.72056	0.86183	-0.67759	1.10676	0.984297	-0.68101	0.965072	0	0.523	0.382	0	0	0	0	0	0	0
2444	STM2516	sinI	putative outer membrane protein	-0.7209	0.860092	-0.64678	1.37458	1.11734	-0.65449	1.07891	0	0.532	0	0.1	1	0	0	0	0	1
4040	STM4200		putative phage tail fiber protein H	-0.72239	0.852475	-0.61929	1.61354	1.23301	-0.64014	1.14051	0	0.556	0.09	0.086	0	0	0	0	0	0
995	STM1025		Gifsy-2 prophage	-0.72311	0.848794	-0.72577	0.68796	0.768377	-0.74949	0.671108	0	0.537	0	0.161	0	0	0	0	0	0
2018	STM2079	wzzB	regulator of length of O-antigen component of lipopolysaccharide chains	-0.72313	0.848692	-0.71493	0.782187	0.815439	-0.70109	0.878875	0	0.505	0.719	0.125	0	0	0	0	0	0
1887	STM1936	yecH	putative cytoplasmic protein	-0.72321	0.848283	-0.68506	1.04183	0.945057	-0.68963	0.928069	0	0.519	0.873	0.19	0	0	0	0	0	0
881	STM0909		Fels-1 prophage	-0.72322	0.848232	-0.7418	0.548619	0.698426	-0.747	0.681797	0	0.515	0	0.16	0	0	0	0	0	0
3028	STM3130		putative cytoplasmic protein	-0.72342	0.84721	-0.79988	0.0437593	0.445484	-0.80888	0.416165	0	0.508	0.365	0.127	0	0	0	0	0	0
537	STM0547	fimH	minor fimbrial subunit	-0.72373	0.845625	-0.64737	1.36945	1.10754	-0.65027	1.09703	0	0.517	0.675	0.167	0	0	0	0	0	0
368	STM0378	yaiY	putative inner membrane protein	-0.72389	0.844807	-0.5465	2.24626	1.54554	-0.58679	1.36953	0	0.542	0.863	0	1	0	0	0	0	1
1009	STM1039		Gifsy-2 prophage; probable minor tail protein	-0.72432	0.842609	-0.7083	0.839818	0.841213	-0.70999	0.84067	0	0.503	0	0	0	0	0	0	0	0
2530	STM2601		Gifsy-1 prophage: similar to minor capsid protein FII of phage N15	-0.72451	0.841637	-0.64694	1.37319	1.10741	-0.67135	1.00654	0	0.567	0	0	0	0	0	0	0	0
722	STM0742	ybgT	putative outer membrane lipoprotein	-0.72461	0.841126	-0.67834	1.10025	0.970686	-0.69252	0.915663	0	0.513	0	0	0	0	0	0	0	0
1939	STM1994		putative inner membrane protein	-0.72466	0.84087	-0.658	1.27705	1.05896	-0.69035	0.924978	0	0.559	0.505	0	0	0	0	0	0	0
2538	STM2609		Gifsy-1 prophage: similar to DNA packaging protein Nu1 of phage 21	-0.72507	0.838774	-0.73507	0.60712	0.722947	-0.75163	0.661922	0	0.52	0.573	0.128	0	0	0	0	0	0
4032	STM4192		putative cytoplasmic protein	-0.72544	0.836883	-0.78415	0.180492	0.508688	-0.77348	0.568126	0	0.443	0.866	0.196	0	0	0	0	0	0
4050	STM4210		putative methyl-accepting chemotaxis protein	-0.72579	0.835094	-0.75923	0.397109	0.616101	-0.77874	0.545547	0	0.561	0.136	0.145	0	0	0	0	0	0
3626	STM3745		putative cytoplasmic protein	-0.72583	0.834889	-0.587	1.89422	1.36455	-0.62384	1.21049	0	0.556	0	0	0	0	0	0	0	0
3330	STM3444	bfd	regulatory or redox component complexing with Bfr, in iron storage and mobility	-0.72592	0.834429	-0.85338	-0.421289	0.20657	-0.81658	0.383111	0	0.423	0.875	0	0	1	0	0	0	1
1660	STM1706	yciH	putative translation initiation factor SUI1	-0.72606	0.833713	-0.778	0.233951	0.533832	-0.73154	0.748162	0	0.466	0.898	0.278	1	1	0	0	0	2
2616	STM2704		Fels-2 prophage: similar to genes in P2-like phages	-0.72625	0.832742	-0.75459	0.437442	0.635092	-0.7527	0.657328	0	0.486	0.289	0.119	1	0	0	0	0	1
1774	STM1823	yoaH	putative cytoplasmic protein	-0.72651	0.831413	-0.72597	0.686222	0.758817	-0.71834	0.804826	0	0.508	0.898	0.254	0	0	0	0	0	0
1607	STM1653		putative membrane transporter of cations	-0.72664	0.830748	-0.80554	-0.00544017	0.412654	-0.76575	0.601309	0	0.417	0.562	0.214	0	0	0	0	0	0
1629	STM1676		putative aldo/keto reductase family	-0.72683	0.829777	-0.81395	-0.078544	0.375616	-0.7415	0.705407	0	0.467	0.329	0.391	0	1	0	0	0	1
3662	STM3782		putative PTS system galactitol-specific enzyme IIC component	-0.72848	0.821342	-0.70033	0.909097	0.865219	-0.70124	0.878231	0	0.468	0.385	0	1	0	0	0	0	1
4174	STM4336	ecnB	putative entericidin B precursor	-0.72874	0.820013	-0.64345	1.40353	1.11177	-0.67191	1.00414	0	0.5	0.958	0	0	0	0	0	0	0
4461	PSLT064		putative inner membrane protein	-0.7289	0.819195	-0.70188	0.895624	0.857409	-0.72476	0.777266	0	0.526	0.336	0.178	0	0	0	0	0	0
4471	PSLT078	traL	conjugative transfer: assembly	-0.72894	0.81899	-0.69654	0.942042	0.880516	-0.69891	0.888233	0	0.486	0	0.214	0	0	0	0	0	0
3682	STM3799		putative periplasmic protein	-0.72906	0.818377	-0.62711	1.54556	1.18197	-0.65655	1.07007	0	0.574	0	0	0	0	0	0	0	0
1273	STM1312	celA	PTS family, sugar specific enzyme IIB for cellobiose, arbutin, and salicin	-0.72908	0.818275	-0.78476	0.17519	0.496732	-0.77732	0.551642	0	0.463	0.84	0	1	1	0	0	0	2
3218	STM3325	yrbL	putative cytoplasmic protein	-0.72924	0.817457	-0.64296	1.40779	1.11262	-0.66879	1.01753	0	0.543	0.771	0.181	0	0	0	0	0	0
1481	STM1526	yneG	putative cytoplasmic protein	-0.73067	0.810146	-0.64168	1.41891	1.11453	-0.67173	1.00491	0	0.549	0.798	0	0	0	0	0	0	0
1764	STM1813	ycgL	putative cytoplasmic protein	-0.73071	0.809942	-0.70836	0.839296	0.824619	-0.70494	0.862348	0	0.452	0.791	0.164	0	1	0	0	0	1
2849	STM2944	ygcB	putative helicase	-0.73139	0.806465	-0.69481	0.95708	0.881773	-0.69257	0.915448	0	0.503	0.293	0.105	0	0	0	0	0	0
381	STM0391	yaiE	putative cytoplasmic protein	-0.73143	0.806261	-0.69222	0.979593	0.892927	-0.6852	0.947086	0	0.532	0.862	0.17	0	0	0	0	0	0
2803	STM2898	invG	invasion protein; outer membrane	-0.73177	0.804523	-0.79446	0.0908727	0.447698	-0.78227	0.530393	0	0.464	0.123	0.032	1	1	0	0	0	2
1669	STM1715	yciN	putative cytoplasmic protein	-0.73187	0.804012	-0.7427	0.540796	0.672404	-0.74773	0.678663	0	0.478	0.928	0.145	0	0	0	0	0	0
2352	STM2423	yfeN	putative outer membrane protein	-0.7319	0.803858	-0.74455	0.524715	0.664287	-0.7523	0.659046	0	0.459	0.81	0	0	0	0	0	0	0
2919	STM3018	kduI	putative pectin degrading enzyme 5-keto 4-deoxyuronate isomerase	-0.73195	0.803603	-0.69829	0.92683	0.865216	-0.69728	0.89523	0	0.514	0.856	0.097	0	0	0	0	0	0
3258	STM3366	yhcR	putative inner membrane protein	-0.73198	0.803449	-0.7509	0.469518	0.636483	-0.75471	0.6487	0	0.458	0.985	0	0	0	0	0	0	0
4354	STM4521	yjiS	putative cytoplasmic protein	-0.73207	0.802989	-0.718	0.755501	0.779245	-0.73345	0.739963	0	0.53	0.556	0.296	0	0	0	0	0	0
238	STM0238	yaeP	putative cytoplasmic protein	-0.73214	0.802631	-0.74584	0.513502	0.658066	-0.77386	0.566495	0	0.505	0.847	0	0	0	0	0	0	0
4285	STM4450		putative inner membrane protein	-0.73217	0.802478	-0.841	-0.313676	0.244401	-0.81351	0.396289	0	0.468	0.67	0	0	0	0	0	0	0
639	STM0652		putative sigma-54 dependent transcriptional regulator	-0.73229	0.801864	-0.74471	0.523324	0.662594	-0.71902	0.801907	0	0.501	0.231	0.117	0	0	0	0	0	0
1489	STM1534		putative hydrogenase	-0.73276	0.799462	-0.73586	0.600253	0.699857	-0.73768	0.721805	0	0.529	0.265	0.206	0	0	0	0	0	0
167	STM0167	yacC	putative periplasmic protein	-0.73292	0.798644	-0.64036	1.43039	1.11451	-0.66754	1.02289	0	0.473	0.957	0	0	0	0	0	0	0
80	STM0080		putative outer membrane lipoprotein	-0.73299	0.798286	-0.7412	0.553835	0.67606	-0.73582	0.729789	0	0.487	0.487	0	0	0	0	0	1	1
2330	STM2395	pgtE	Phosphoglycerate transport: outer membrane protein E	-0.73307	0.797877	-0.6537	1.31443	1.05615	-0.66634	1.02805	0	0.463	0.478	0.071	1	1	0	0	0	2
1405	STM1447	ydhA	putative outer membrane lipoprotein	-0.73346	0.795883	-0.73373	0.618768	0.707325	-0.73315	0.741251	0	0.462	0.679	0.138	0	0	0	0	0	0
84	STM0084		putative sulfatase	-0.73409	0.792662	-0.76335	0.361296	0.576979	-0.75671	0.640115	0	0.462	0.14	0.178	0	0	0	0	1	1
1307	STM1346	ydiE	putative cytoplasmic protein	-0.73423	0.791947	-0.61757	1.62849	1.21022	-0.63276	1.17219	0	0.513	0.603	0.206	0	0	0	0	0	0
2531	STM2602		Gifsy-1 prophage: similar to DNA packaging protein gp9 of phage N14	-0.73442	0.790975	-0.72933	0.657015	0.723995	-0.74506	0.690125	0	0.549	0	0.227	0	0	0	0	0	0
2946	STM3047	ygfY	putative cytoplasmic protein	-0.73453	0.790413	-0.80952	-0.0400363	0.375188	-0.78951	0.499314	0	0.444	0.932	0.205	0	0	0	0	0	0
2030	STM2091	rfbG	LPS side chain defect: CDP glucose 4,6-dehydratase	-0.73454	0.790362	-0.80689	-0.017175	0.386593	-0.74556	0.687978	0	0.437	0.245	0.226	1	0	0	0	0	1
380	STM0390	aroM	protein of aro operon, regulated by aroR	-0.73465	0.7898	-0.74853	0.490119	0.639959	-0.76608	0.599892	0	0.507	0.778	0.12	1	0	0	0	0	1
2632	STM2720		Fels-2 prophage: similar to gpN, major capsid, in phage P2	-0.735	0.78801	-0.64237	1.41291	1.10046	-0.67402	0.995078	0	0.542	0	0	0	0	0	0	0	0
1688	STM1734	yciC	putative inner membrane protein	-0.73519	0.787039	-0.74038	0.560963	0.674001	-0.75631	0.641832	0	0.511	0.87	0	0	0	0	0	0	0
863	STM0892	ybjP	putative lipoprotein	-0.73595	0.783154	-0.70165	0.897623	0.840388	-0.73347	0.739877	0	0.569	0.842	0.199	0	0	0	0	0	0
1007	STM1037		Gifsy-2 prophage; probable minor tail protein	-0.73613	0.782234	-0.63367	1.48854	1.13539	-0.67512	0.990356	0	0.554	0	0.128	0	0	0	0	0	0
1877	STM1925	flhD	regulator of flagellar biosynthesis, acts on class 2 operons	-0.73637	0.781007	-0.61525	1.64865	1.21483	-0.62866	1.18979	0	0.486	0.914	0.138	0	0	0	0	0	0
939	STM0969	ycaM	putative APC family, amino-acid transporter	-0.73671	0.779269	-0.77827	0.231604	0.505436	-0.74437	0.693087	0	0.473	0.924	0.144	0	0	0	0	0	0
293	STM0300	safB	putative fimbriae assembly chaparone	-0.73692	0.778195	-0.75868	0.40189	0.590043	-0.73518	0.732537	0	0.489	0.304	0.097	1	0	0	0	0	1
3939	STM4082	yiiQ	putative periplasmic protein	-0.73706	0.777479	-0.60674	1.72263	1.25005	-0.63751	1.1518	0	0.518	0.813	0.172	0	0	0	0	0	0
552	STM0565		putative periplasmic protein	-0.73717	0.776917	-0.62535	1.56086	1.16889	-0.64283	1.12897	0	0.462	0.538	0	0	0	0	0	0	0
3342	STM3456	yheV	putative cytoplasmic protein	-0.73728	0.776355	-0.73522	0.605816	0.691085	-0.72607	0.771643	0	0.49	0	0.212	0	0	0	0	0	0
4495	PSLT104	traD	conjugative transfer: DNA transport	-0.73747	0.775383	-0.69877	0.922657	0.84902	-0.71659	0.812338	0	0.544	0.046	0.076	0	0	0	0	0	0
1586	STM1632		putative inner membrane protein	-0.73761	0.774668	-0.7136	0.793748	0.784208	-0.71774	0.807401	0	0.471	0	0	0	0	0	0	0	0
2529	STM2600		Gifsy-1 prophage: similar to minor tail protein Z	-0.73768	0.77431	-0.66542	1.21255	0.993431	-0.68035	0.967905	0	0.524	0.094	0.104	0	0	0	0	0	0
155	STM0155		putative outer membrane protein	-0.73864	0.769402	-0.60912	1.70194	1.23567	-0.64633	1.11394	0	0.56	0	0.181	0	0	0	0	0	0
4522	PSLT044	rlgA	putative integrase protein	-0.73865	0.769351	-0.53716	2.32745	1.5484	-0.572	1.43302	0	0.556	0.166	0	0	0	0	0	0	0
1961	STM2022	cbiN	synthesis of vitamin B12 adenosyl cobalamide precursor	-0.7387	0.769095	-0.75469	0.436573	0.602834	-0.76854	0.589332	0	0.498	0	0.258	0	0	0	0	0	0
4465	PSLT069	psiB	Plasmid SOS inhibition	-0.73879	0.768635	-0.56796	2.05972	1.41418	-0.61021	1.269	0	0.588	0	0.097	0	0	0	0	0	0
2792	STM2887	spaS	surface presentation of antigens; secretory proteins	-0.73887	0.768226	-0.7418	0.548619	0.658423	-0.71341	0.825989	0	0.434	0.244	0	0	1	0	0	0	1
1549	STM1595	srfC	ssrAB activated gene: predicted coiled-coil structure	-0.73897	0.767715	-0.64198	1.4163	1.09201	-0.67141	1.00628	0	0.57	0	0	0	0	0	0	0	0
4370	STM4537		putative PTS permease	-0.73898	0.767664	-0.77926	0.222999	0.495331	-0.76174	0.618522	0	0.506	0.32	0	0	0	0	0	0	0
1214	STM1252		putative cytoplasmic protein	-0.73908	0.767153	-0.75542	0.430228	0.59869	-0.74736	0.680251	0	0.507	0	0.196	0	0	0	0	0	0
4443	PSLT030		putative cytoplasmic protein	-0.73939	0.765568	-0.48498	2.78103	1.7733	-0.52997	1.61344	0	0.601	0	0	0	1	1	0	0	2
4460	PSLT063		putative cytoplasmic protein	-0.73941	0.765466	-0.73067	0.645367	0.705416	-0.7503	0.667631	0	0.537	0.194	0.167	0	0	0	0	0	0
4183	STM4345	yjeM	putative APC family, amino-acid transport protein	-0.73945	0.765261	-0.76334	0.361383	0.563322	-0.73865	0.717641	0	0.486	0.874	0.17	0	0	0	0	0	0
2936	STM3036		putative inner membrane protein	-0.73948	0.765108	-0.62258	1.58494	1.17502	-0.63783	1.15043	0	0.514	0	0	1	0	0	0	0	1
698	STM0718		putative cytoplasmic protein	-0.74004	0.762245	-0.53951	2.30702	1.53463	-0.58764	1.36588	0	0.566	0	0	0	1	0	0	0	1
1487	STM1532		putative dehydrogenase protein	-0.74022	0.761325	-0.62254	1.58529	1.17331	-0.62874	1.18945	0	0.543	0	0	0	0	0	0	0	0
2088	STM2150	stcC	paral putative outer membrane protein	-0.74026	0.76112	-0.73428	0.613987	0.687554	-0.70754	0.851187	0	0.458	0.747	0	1	1	0	0	0	2
1833	STM1881	yebF	putative periplasmic protein	-0.7406	0.759382	-0.55304	2.18941	1.4744	-0.58579	1.37382	0	0.533	0.769	0.231	0	0	0	0	0	0
2643	STM2732		Fels-2 prophage: similar to protein in phage 186	-0.74069	0.758922	-0.67493	1.12989	0.944404	-0.69962	0.885185	0	0.536	0	0	0	0	0	0	0	0
875	STM0903		Fels-1 prophage; putative chaparone	-0.74076	0.758564	-0.60123	1.77052	1.26454	-0.62095	1.22289	0	0.547	0.336	0.089	0	0	0	0	0	0
505	STM0515	allA	ureidoglycolate hydrolase	-0.74111	0.756775	-0.77129	0.292278	0.524526	-0.77952	0.542198	0	0.504	0.85	0.163	0	0	0	0	0	0
201	STM0201		putative outer membrane protein	-0.74216	0.751407	-0.64149	1.42056	1.08599	-0.68597	0.94378	0	0.497	0.384	0	0	0	0	0	0	0
797	STM0825	ybiI	putative DnaK suppressor protein	-0.74256	0.749362	-0.80216	0.0239405	0.386651	-0.80803	0.419813	0	0.523	0.807	0.239	1	1	0	0	0	2
2848	STM2943		putative cytoplasmic protein	-0.74273	0.748493	-0.65363	1.31504	1.03176	-0.68286	0.957131	0	0.544	0.162	0.027	0	0	0	0	0	0
18	STM0018		putative exochitinase	-0.74296	0.747317	-0.75299	0.45135	0.599334	-0.7662	0.599377	0	0.511	0.023	0.132	0	0	0	0	0	0
2086	STM2148		putative periplasmic protein	-0.74338	0.74517	-0.738	0.581651	0.663411	-0.76771	0.592895	0	0.478	0.817	0	0	0	0	0	0	0
1834	STM1882	yebG	DNA damage-inducible gene in SOS regulon, dependent on cyclic AMP and H-NS	-0.74345	0.744812	-0.81765	-0.110706	0.317053	-0.8237	0.352547	0	0.521	0.792	0.208	0	0	0	0	0	0
165	STM0165	speD	S-adenosylmethionine decarboxylase, proenzyme	-0.74362	0.743943	-0.72194	0.721252	0.732598	-0.73979	0.712747	0	0.497	0.966	0.117	0	0	0	0	0	0
1981	STM2042	pduE	Propanediol utilization: dehydratase, small subunit	-0.74431	0.740416	-0.6545	1.30747	1.02394	-0.69749	0.894328	0	0.562	0	0.208	0	0	0	0	0	0
855	STM0884	ulaA	putative inner membrane protein; homology to SgaT from Vibrio	-0.74434	0.740262	-0.73599	0.599123	0.669693	-0.74141	0.705793	0	0.456	0.365	0	1	1	0	0	0	2
237	STM0237	rof	modulator of Rho-dependent transcription termination	-0.74441	0.739905	-0.75817	0.406323	0.573114	-0.7712	0.577913	0	0.435	0.814	0	0	0	0	0	0	0
4053	STM4213		putative phage tail sheath protein	-0.74465	0.738678	-0.67372	1.1404	0.939541	-0.68904	0.930602	0	0.55	0	0	0	0	0	0	0	0
1040	STM1071	sulA	suppressor of lon; inhibitor of cell division and FtsZ ring formation upon DNA damage/inhibition, HslVU and Lon involved in its turnover	-0.74485	0.737655	-0.66925	1.17926	0.958458	-0.69846	0.890164	0	0.507	0.781	0.107	0	0	0	0	0	0
2794	STM2889	spaQ	surface presentation of antigens; secretory proteins	-0.74486	0.737604	-0.74002	0.564092	0.650848	-0.72963	0.756361	0	0.469	0.256	0	0	0	0	0	0	0
1561	STM1607		putative outer membrane lipoprotein	-0.74487	0.737553	-0.72675	0.679441	0.708497	-0.7515	0.66248	0	0.494	0.847	0	0	0	1	0	0	1
2908	STM3007	ygdR	putative POT family, peptide transport protein	-0.74509	0.736428	-0.70341	0.882324	0.809376	-0.7145	0.82131	0	0.472	0.903	0	0	0	0	0	0	0
2640	STM2729		Fels-2 prophage: similar to retron in E coli	-0.74528	0.735457	-0.7076	0.845903	0.79068	-0.73358	0.739405	0	0.563	0	0	0	0	0	0	0	0
1808	STM1857		putative acetyltransferase	-0.74556	0.734026	-0.79216	0.110865	0.422445	-0.76465	0.606031	0	0.427	0.201	0.187	0	0	0	0	0	0
3021	STM3123		putative arylsulfatase regulator	-0.74569	0.733361	-0.71501	0.781491	0.757426	-0.69282	0.914375	0	0.499	0.368	0.127	0	0	0	0	0	0
1687	STM1733		putative ferredoxin	-0.74585	0.732543	-0.65522	1.30122	1.01688	-0.6729	0.999886	0	0.512	0.604	0.149	0	0	0	0	0	0
329	STM0339	stbB	putative fimbriae; chaparone	-0.74604	0.731572	-0.72924	0.657797	0.694684	-0.71549	0.81706	0	0.455	0.395	0.087	0	0	0	0	0	0
4248	STM4413		putative imidazolonepropionase and related amidohydrolases	-0.74606	0.731469	-0.77621	0.249511	0.49049	-0.77054	0.580747	0	0.472	0.186	0.225	1	1	0	0	0	2
1223	STM1261		putative cytoplasmic protein	-0.74645	0.729476	-0.765	0.346954	0.538215	-0.78495	0.518889	0	0.525	0	0.25	0	0	0	0	0	0
1946	STM2005		putative endoprotease	-0.74686	0.72738	-0.62459	1.56747	1.14742	-0.65725	1.06707	0	0.581	0	0.242	0	0	0	0	0	0
1685	STM1731		putative catalase	-0.74696	0.726869	-0.79551	0.0817455	0.404307	-0.79738	0.465531	0	0.534	0	0.055	0	0	0	0	0	0
3540	STM3659	yiaB	putative inner membrane protein	-0.74704	0.72646	-0.70842	0.838775	0.782617	-0.73259	0.743655	0	0.516	0.274	0	0	0	0	0	0	0
1344	STM1384	ttrC	Tetrathionate reductase complex, subunit C	-0.74717	0.725795	-0.69183	0.982983	0.854389	-0.71301	0.827706	0	0.556	0	0.135	0	0	0	0	0	0
1711	STM1760		putative TPR repeat protein	-0.74762	0.723494	-0.72738	0.673965	0.69873	-0.70941	0.843159	0	0.495	0.198	0.232	0	0	0	0	0	0
1982	STM2043	pduG	Propanediol utilization: diol dehydratase reactivation	-0.74772	0.722983	-0.59306	1.84154	1.28226	-0.63953	1.14313	0	0.597	0	0.043	0	0	0	0	0	0
2521	STM2592		Gifsy-1 prophage: similar to phage tail component L	-0.74778	0.722677	-0.65674	1.288	1.00534	-0.66942	1.01482	0	0.53	0	0.181	0	0	0	0	0	0
1379	STM1419	yscR	Secretion system apparatus: homology with YscR of the secretion system of Yersinia	-0.74791	0.722012	-0.81268	-0.0675046	0.327254	-0.77	0.583065	0	0.43	0.386	0	0	1	0	0	1	2
3434	STM3552	yhhA	putative outer membrane protein	-0.74848	0.719098	-0.67795	1.10364	0.911367	-0.71963	0.799288	0	0.536	0.674	0.225	0	0	0	0	0	0
4477	PSLT084	traV	conjugative transfer: assembly	-0.74867	0.718127	-0.68812	1.01523	0.86668	-0.73352	0.739662	0	0.584	0	0.164	0	0	0	0	0	0
3096	STM3198		putative inner membrane protein	-0.74902	0.716337	-0.64887	1.35641	1.03638	-0.68315	0.955886	0	0.531	0.709	0.126	0	0	0	0	0	0
2709	STM2799	stpA	DNA-binding protein with chaperone activity	-0.74909	0.71598	-0.77137	0.291582	0.503781	-0.7811	0.535416	0	0.466	0.85	0.203	0	0	0	0	0	0
593	STM0606	ybdO	putative transcriptional regulator, LysR family	-0.74964	0.713168	-0.87583	-0.616436	0.0483661	-0.85469	0.219516	0	0.39	0.54	0	1	1	0	0	1	3
4261	STM4426	srfJ	activated by transcription factor SsrB, similar to Homo sapiens lysosomal glucosyl ceramidase	-0.74983	0.712197	-0.66068	1.25375	0.982976	-0.67439	0.99349	0	0.535	0	0.302	0	0	0	0	0	0
3794	STM3928	wecF	TDP-Fuc4NAc:lipidII transferase	-0.74997	0.711481	-0.66581	1.20916	0.960321	-0.69507	0.904717	0	0.524	0.938	0	0	0	0	0	0	0
888	STM0916		Fels-1 prophage; putative major tail protein	-0.75026	0.709998	-0.66346	1.22959	0.969794	-0.70515	0.861446	0	0.569	0.126	0.162	0	0	0	0	0	0
2527	STM2598		Gifsy-1 prophage	-0.75047	0.708925	-0.71729	0.761672	0.735299	-0.7616	0.619123	0	0.506	0	0.128	0	0	0	0	0	0
2542	STM2613		Gifsy-2 prophage	-0.7505	0.708771	-0.79714	0.0675768	0.388174	-0.8199	0.368859	0	0.524	0	0	0	0	0	0	0	0
2542	STM2613		Gifsy-1 prophage	-0.7505	0.708771	-0.79714	0.0675768	0.388174	-0.8199	0.368859	0	0.52	0.248	0.147	0	0	0	0	0	0
3661	STM3781		putative sugar (pentulose and hexulose) kinase	-0.75077	0.707391	-0.87041	-0.569322	0.0690344	-0.83669	0.296785	0	0.491	0.237	0.2	1	0	0	0	0	1
887	STM0915		Fels-1 prophage	-0.7508	0.707238	-0.69734	0.935088	0.821163	-0.74889	0.673684	0	0.551	0	0.188	0	0	1	0	0	1
2607	STM2695		Fels-2 prophage: similar to late control gene in phage	-0.75095	0.706471	-0.58067	1.94924	1.32786	-0.58629	1.37168	0	0.537	0	0	0	0	0	0	0	0
1849	STM1897	yebB	putative periplasmic protein	-0.75148	0.703761	-0.65391	1.3126	1.00818	-0.69866	0.889306	0	0.489	0.774	0	0	0	0	0	0	0
3440	STM3558		homology to death -on-curing protein of phage P1	-0.75164	0.702943	-0.81521	-0.0894966	0.306723	-0.81671	0.382553	0	0.522	0	0.18	0	0	0	0	0	0
279	STM0286		putative cytoplasmic protein	-0.75209	0.700643	-0.57421	2.00539	1.35302	-0.64311	1.12777	0	0.656	0	0	0	0	0	0	0	0
4270	STM4435		putative cytoplasmic protein	-0.75244	0.698854	-0.76738	0.326265	0.51256	-0.77362	0.567525	0	0.469	0.17	0.162	0	0	0	0	0	0
1906	STM1959	fliC	flagellar biosynthesis; flagellin, filament structural protein	-0.7529	0.696502	-0.74743	0.499681	0.598091	-0.74314	0.698367	0	0.492	0.547	0.105	0	0	0	0	0	0
299	STM0306		homologue of sapA	-0.75348	0.693537	-0.78009	0.215784	0.45466	-0.77985	0.540782	0	0.428	0.188	0	0	0	0	0	0	0
3299	STM3413	yhdN	putative cytoplasmic protein	-0.75414	0.690163	-0.73538	0.604425	0.647294	-0.76792	0.591994	0	0.492	0.861	0.189	0	0	0	0	0	0
2711	STM2801	ygaC	putative cytoplasmic protein	-0.75427	0.689498	-0.67496	1.12963	0.909562	-0.71882	0.802765	0	0.5	0.853	0	0	0	0	0	0	0
4271	STM4436		putative endonuclease	-0.75442	0.688732	-0.74449	0.525237	0.606984	-0.76133	0.620282	0	0.517	0.214	0.116	0	0	0	0	0	0
4224	STM4389	yjfY	putative outer membrane protein	-0.75456	0.688016	-0.71153	0.811741	0.749879	-0.73991	0.712232	0	0.491	0.648	0	0	0	0	0	0	0
4351	STM4518		putative inner membrane protein	-0.75485	0.686533	-0.72508	0.693958	0.690246	-0.75065	0.666128	0	0.528	0.345	0.14	0	0	0	0	0	0
1548	STM1594	srfB	ssrAB activated gene	-0.75549	0.683261	-0.62683	1.548	1.11563	-0.64917	1.10175	0	0.552	0	0.036	0	0	0	0	0	0
539	STM0549	fimZ	fimbrial protein Z, putative transcriptional regulator (LuxR/UhpA family)	-0.75561	0.682648	-0.77388	0.269764	0.476206	-0.74347	0.69695	0	0.411	0.719	0.086	0	0	0	0	1	1
3068	STM3170		putative inner membrane protein	-0.75592	0.681063	-0.77327	0.275067	0.478065	-0.77076	0.579802	0	0.475	0.219	0.106	0	0	0	0	0	0
1065	STM1097		putative periplasmic or exported protein	-0.75596	0.680859	-0.7325	0.62946	0.655159	-0.74674	0.682913	0	0.483	0.684	0.346	0	0	0	0	0	0
2537	STM2608		Gifsy-1 prophage: similar to terminase large chain gp2 of N15	-0.75626	0.679325	-0.66602	1.20734	0.943331	-0.67873	0.974859	0	0.514	0.103	0.039	0	0	0	0	0	0
1540	STM1586		putative periplasmic protein	-0.7563	0.679121	-0.67472	1.13171	0.905416	-0.69804	0.891967	0	0.517	0.895	0.167	0	0	0	0	0	0
4082	STM4242		putative outer membrane or exported	-0.75634	0.678916	-0.6326	1.49784	1.08838	-0.66124	1.04994	0	0.522	0	0.076	1	0	0	0	0	1
1105	STM1139	csgG	putative transcriptional regulator in curly assembly/transport, 2nd curli operon	-0.75639	0.678661	-0.70757	0.846163	0.762412	-0.72798	0.763444	0	0.491	0.96	0.083	0	0	0	0	0	0
3092	STM3194		putative disulfide isomerase	-0.75639	0.678661	-0.71962	0.741419	0.71004	-0.74439	0.693001	0	0.511	0.173	0	0	0	0	0	0	0
3065	STM3167		putative diadenosine tetraphosphate (Ap4A) hydrolase	-0.75642	0.678507	-0.82301	-0.157298	0.260605	-0.80386	0.437714	0	0.481	0.166	0.252	0	0	0	0	0	0
1470	STM1515	ydeI	putative periplasmic protein	-0.75652	0.677996	-0.80069	0.0367184	0.357357	-0.80666	0.425694	0	0.48	0.792	0.131	0	0	0	0	0	0
4375	STM4542	yjjA	putative outer membrane protein	-0.75674	0.676871	-0.69386	0.965338	0.821104	-0.73981	0.712661	0	0.54	0.725	0.17	0	0	0	0	0	0
41	STM0041		putative glycosyl hydrolase	-0.7569	0.676053	-0.74627	0.509764	0.592909	-0.74463	0.691971	0	0.546	0.211	0.25	0	0	0	0	0	0
2751	STM2846	hycH	processing of HycE (part of the FHL complex)	-0.75698	0.675644	-0.58734	1.89126	1.28345	-0.62993	1.18434	0	0.561	0.912	0.154	0	0	0	0	0	0
2525	STM2596		Gifsy-1 prophage: similar to minor tail protein	-0.7571	0.675031	-0.68959	1.00245	0.838743	-0.71323	0.826761	0	0.534	0	0.244	1	0	0	0	0	1
1650	STM1697		putative Diguanylate cyclase/phosphodiesterase domain 2	-0.75744	0.673293	-0.7988	0.0531472	0.36322	-0.79408	0.479697	0	0.483	0.197	0	0	0	0	0	0	0
404	STM0414	yajI	putative outer membrane lipoprotein	-0.75745	0.673242	-0.62494	1.56442	1.11883	-0.66118	1.0502	0	0.529	0.682	0.168	0	0	0	0	0	0
98	STM0098		putative secreted protein	-0.7579	0.670941	-0.73907	0.57235	0.621646	-0.73089	0.750952	0	0.495	0.189	0.141	0	0	0	0	0	0
4369	STM4536		putative PTS permease	-0.75807	0.670072	-0.78659	0.159283	0.414677	-0.8018	0.446557	0	0.458	0.288	0.137	0	0	0	0	0	0
4045	STM4205		putative phage glycosyltransferase	-0.75851	0.667823	-0.85416	-0.428069	0.119877	-0.81771	0.37826	0	0.438	0.79	0.217	1	0	0	0	0	1
3129	STM3232	yqjF	putative membrane-associated protein	-0.75861	0.667311	-0.73428	0.613987	0.640649	-0.72252	0.786882	0	0.499	0.814	0.199	0	0	0	0	0	0
3666	STM3786	yicN	putative inner membrane protein	-0.75877	0.666494	-0.62813	1.5367	1.10159	-0.68342	0.954727	0	0.524	0.827	0.107	0	0	0	0	0	0
3854	STM3998	yihG	putative endonuclease	-0.75893	0.665676	-0.80319	0.0149872	0.340331	-0.79161	0.490299	0	0.463	0.815	0.192	1	0	0	0	0	1
33	STM0033		putative 5'-nucleotidase	-0.75898	0.66542	-0.78239	0.195791	0.430606	-0.75367	0.653165	0	0.468	0.264	0.258	0	0	0	0	0	0
2841	STM2936	iap	aminopeptidase in alkaline phosphatase isozyme conversion	-0.75906	0.665011	-0.65973	1.26201	0.963512	-0.69613	0.900166	0	0.521	0.842	0.178	0	0	0	0	0	0
4478	PSLT085	traR	conjugative transfer	-0.75919	0.664346	-0.83161	-0.232053	0.216146	-0.83962	0.284207	0	0.489	0.356	0.233	1	0	0	0	0	1
4481	PSLT089	trbI	conjugative transfer	-0.75922	0.664193	-0.72939	0.656493	0.660343	-0.79019	0.496395	0	0.604	0	0.164	0	0	0	0	0	0
546	STM0558	yfdH	putative glycosyltransferase	-0.75928	0.663886	-0.87185	-0.581839	0.0410234	-0.83676	0.296484	0	0.423	0.883	0.211	0	0	0	0	0	0
2668	STM2757		putative cytoplasmic protein	-0.75935	0.663528	-0.67722	1.10998	0.886755	-0.72588	0.772459	0	0.555	0	0	0	0	0	0	0	0
3851	STM3995	yihD	putative cytoplasmic protein	-0.75938	0.663375	-0.73171	0.636327	0.649851	-0.76936	0.585812	0	0.454	0.944	0.225	0	0	0	0	0	0
2177	STM2240		putative cytoplasmic protein	-0.75962	0.662148	-0.65648	1.29026	0.976206	-0.70551	0.859901	0	0.544	0.574	0.061	0	1	0	0	0	1
3956	STM4099	metJ	transcriptional repressor of all met genes but metF (MetJ family)	-0.75996	0.66041	-0.69869	0.923353	0.791881	-0.73761	0.722105	0	0.517	0.981	0.143	0	0	0	0	0	0
3286	STM3400	yrdB	putative periplasmic protein	-0.76001	0.660154	-0.6967	0.940651	0.800403	-0.72438	0.778898	0	0.506	0.718	0.2	0	0	0	0	1	1
2932	STM3031		ail and ompX homologue	-0.76012	0.659592	-0.72076	0.731509	0.695551	-0.72478	0.777181	0	0.487	0.298	0.118	0	0	0	0	1	1
4213	STM4378	yjfN	putative inner membrane protein	-0.76032	0.65857	-0.76636	0.335132	0.496851	-0.79798	0.462955	0	0.503	0.717	0.283	0	0	1	0	0	1
58	STM0058	citC2	putative citrate lyase synthetase (citrate (pro-3S)-lyase ligase	-0.76041	0.65811	-0.69805	0.928916	0.793513	-0.72817	0.762628	0	0.538	0.47	0.072	0	0	0	0	0	0
1515	STM1561		putative outer membrane or secreted lipoprotein	-0.76063	0.656985	-0.63394	1.48619	1.07159	-0.67655	0.984218	0	0.538	0	0	0	0	0	0	0	0
2922	STM3021		putative inner membrane protein	-0.76063	0.656985	-0.70713	0.849988	0.753486	-0.72265	0.786324	0	0.506	0	0	0	0	0	0	0	0
645	STM0658	ybeV	putative molecular chaperone, DnaJ family	-0.76085	0.65586	-0.67265	1.14971	0.902783	-0.72686	0.768252	0	0.541	0.522	0.073	0	0	0	0	0	0
2399	STM2470	eutS	putative carboxysome structural protein, ethanol utilization	-0.76104	0.654889	-0.7244	0.699869	0.677379	-0.76272	0.614316	0	0.51	0.946	0	0	0	0	0	0	0
2515	STM2586		Gifsy-1 prophage: similar to phage tail assembly protein	-0.76113	0.654429	-0.71204	0.807308	0.730868	-0.72308	0.784478	0	0.479	0.625	0.151	1	0	0	0	1	2
2333	STM2398	pgtC	Phosphoglycerate transport: protein for signal transmission	-0.76117	0.654224	-0.67856	1.09833	0.876278	-0.69768	0.893513	0	0.54	0.134	0.065	0	0	0	0	0	0
2801	STM2896	invA	invasion protein	-0.76144	0.652844	-0.87114	-0.575668	0.0385881	-0.83446	0.306357	0	0.456	0.337	0	1	1	0	0	0	2
2345	STM2410	yfeA	putative Diguanylate cyclase/phosphodiesterase domain 1; Diguanylate cyclase/phosphodiesterase domain 2	-0.7628	0.645891	-0.73752	0.585823	0.615857	-0.76507	0.604228	0	0.506	0.68	0	0	0	0	0	0	0
3935	STM4078	yneB	putative fructose-1,6-bisphosphate aldolase	-0.76314	0.644153	-0.78954	0.13364	0.388896	-0.79454	0.477722	0	0.473	0.893	0.12	1	0	0	0	0	1
1797	STM1846	proQ	activator of proP	-0.76332	0.643233	-0.74345	0.534277	0.588755	-0.77189	0.574952	0	0.538	0.939	0.149	0	0	0	0	0	0
3530	STM3648	yiaG	putative transcriptional regulator	-0.7637	0.64129	-0.72024	0.73603	0.68866	-0.75729	0.637625	0	0.455	0.792	0	0	0	0	0	0	0
3868	STM4012		putative coproporphyrinogen III oxidase and related FeS oxidoreductases	-0.76409	0.639297	-0.65875	1.27053	0.954914	-0.64899	1.10252	0	0.48	0.16	0.177	0	1	0	0	0	1
1350	STM1390	orf242	putative regulatory proteins, merR family	-0.76416	0.638939	-0.75155	0.463868	0.551403	-0.77941	0.54267	0	0.538	0.417	0.103	0	0	0	0	0	0
4217	STM4382	yjfR	putative Zn-dependent hydrolases of the beta-lactamase fold	-0.76425	0.638479	-0.61173	1.67925	1.15887	-0.64526	1.11854	0	0.523	0.972	0.11	0	0	0	0	0	0
3618	STM3737		putative Zn-dependent hydrolase, including glyoxylases	-0.76468	0.63628	-0.7114	0.812871	0.724576	-0.73445	0.73567	0	0.518	0.109	0.133	0	0	0	0	0	0
3572	STM3691		putative inner membrane protein	-0.76475	0.635923	-0.71386	0.791488	0.713705	-0.73421	0.7367	0	0.528	0.079	0.131	0	0	0	0	0	0
2134	STM2195		putative transcriptional regulator	-0.76482	0.635565	-0.80268	0.0194204	0.327493	-0.8523	0.229776	0	0.517	0.132	0.194	0	0	0	0	0	0
1932	STM1987		putative inner membrane protein	-0.76548	0.632191	-0.69734	0.935088	0.783639	-0.73677	0.725711	0	0.533	0.647	0	0	0	0	0	0	0
4427	STM4597		putative periplasmic protein	-0.76557	0.631731	-0.68983	1.00037	0.816049	-0.73913	0.71558	0	0.494	0.26	0.183	0	0	0	0	0	0
2251	STM2315	yfbK	putative von Willebrand factor, vWF type A domain	-0.76564	0.631373	-0.6541	1.31095	0.971162	-0.6926	0.91532	0	0.528	0.621	0.138	0	0	0	0	0	0
3535	STM3653		putative acetyltransferase	-0.76573	0.630913	-0.74503	0.520543	0.575728	-0.73303	0.741766	0	0.418	0.323	0.187	0	0	0	0	0	0
1980	STM2041	pduD	Propanediol utilization: dehydratase, medium subunit	-0.766	0.629532	-0.65449	1.30756	0.968547	-0.71516	0.818476	0	0.571	0	0	0	0	0	0	0	0
615	STM0628	pagP	PhoPQ-activated gene	-0.766	0.629532	-0.68193	1.06904	0.849286	-0.73285	0.742539	0	0.495	0.737	0	0	0	0	0	0	0
1374	STM1414	ssaV	Secretion system apparatus: homology with the LcrD family of proteins	-0.76602	0.62943	-0.86674	-0.537421	0.0460046	-0.83298	0.31271	0	0.466	0.33	0.07	0	1	1	1	1	4
1597	STM1643		putative inner membrane protein	-0.76609	0.629072	-0.71555	0.776797	0.702935	-0.7215	0.791261	0	0.501	0	0.268	0	0	0	0	0	0
2355	STM2426		putative cytoplasmic protein	-0.76616	0.628714	-0.82493	-0.173988	0.227363	-0.84555	0.258751	0	0.515	0	0	0	0	0	0	0	0
592	STM0605	ybdN	putative 3'-phosphoadenosine 5'-phosphosulfate sulfotransferase (PAPS reductase)/FAD synthetase	-0.76627	0.628152	-0.77228	0.283672	0.455912	-0.80713	0.423677	0	0.49	0.813	0.131	0	0	0	0	0	0
1001	STM1031		Gifsy-2 prophage	-0.7667	0.625954	-0.61688	1.63449	1.13022	-0.6488	1.10334	0	0.55	0.032	0.029	0	1	0	0	0	1
3477	STM3595		putative phosphatase	-0.76708	0.624011	-0.64269	1.41013	1.01707	-0.68962	0.928112	0	0.552	0	0	0	0	0	0	0	0
912	STM0940	ybjX	homologue of virK	-0.76708	0.624011	-0.73919	0.571307	0.597659	-0.7642	0.607962	0	0.469	0.559	0	0	0	0	0	0	0
2619	STM2707		Fels-2 prophage: similar to tail fiber protein (gpH) in phage P2	-0.76715	0.623653	-0.65837	1.27383	0.948744	-0.69283	0.914332	0	0.562	0	0.1	0	0	0	0	0	0
2815	STM2910		putative cytoplasmic protein	-0.76725	0.623142	-0.74307	0.53758	0.580361	-0.79075	0.493991	0	0.558	0.111	0	0	0	0	0	0	0
4156	STM4317		putative helix-turn-helix protein, copG family	-0.76739	0.622426	-0.76168	0.375813	0.49912	-0.78417	0.522237	0	0.549	0	0.134	0	0	0	0	0	0
1458	STM1503	ynfB	putative periplasmic protein	-0.76748	0.621966	-0.65357	1.31556	0.968762	-0.69722	0.895487	0	0.522	0.814	0.142	0	0	0	0	0	0
2210	STM2274		putative permease	-0.76768	0.620944	-0.87634	-0.620869	3.75562e-05	-0.84609	0.256433	0	0.42	0.274	0.22	0	0	0	0	0	0
179	STM0179	yadE	putative xylanase/chitin deacetylase	-0.76892	0.614605	-0.69989	0.912922	0.763763	-0.73398	0.737688	0	0.504	0.819	0	0	0	0	0	0	0
3151	STM3255		putative phosphotransferase system fructose-specific component IIB	-0.76904	0.613991	-0.72464	0.697783	0.655887	-0.73975	0.712919	0	0.474	0.404	0	0	0	0	0	0	0
4458	PSLT061		putative inner membrane protein	-0.76933	0.612509	-0.57461	2.00192	1.30721	-0.64938	1.10085	0	0.614	0	0.114	0	0	0	0	0	0
2612	STM2700		Fels-2 prophage: similar to genes in P2-like phages	-0.76933	0.612509	-0.79162	0.115559	0.364034	-0.82966	0.326962	0	0.561	0	0.129	0	1	0	0	0	1
2641	STM2730		Fels-2 prophage: similar to retron in E coli	-0.76948	0.611742	-0.8613	-0.490134	0.0608041	-0.85925	0.199941	0	0.462	0.428	0.074	0	0	0	0	0	0
1012	STM1042		Gifsy-2 prophage; probable minor tail protein	-0.76994	0.60939	-0.73606	0.598514	0.603952	-0.77033	0.581648	0	0.512	0	0	0	0	0	0	0	0
2406	STM2478		putative beta-lactamase class C	-0.77004	0.608879	-0.81081	-0.0512496	0.278815	-0.80979	0.412258	0	0.461	0.729	0.13	0	0	0	0	0	0
641	STM0654	ybeQ	putative TPR repeat protein	-0.77016	0.608266	-0.70742	0.847467	0.727866	-0.69614	0.900124	0	0.475	0.483	0.266	0	0	0	0	0	0
4521	PSLT043		putative phosphoribulokinase / uridine kinase family	-0.77024	0.607857	-0.78982	0.131206	0.369531	-0.82413	0.350701	0	0.539	0.202	0.138	1	0	0	0	0	1
3506	STM3624	yhjU	putative inner membrane protein	-0.77042	0.606936	-0.56081	2.12187	1.36441	-0.62441	1.20804	0	0.553	0.85	0	0	0	0	0	0	0
4486	PSLT095	traN	conjugative transfer: aggregate stability	-0.77075	0.605249	-0.64461	1.39344	0.999346	-0.69774	0.893255	0	0.545	0	0	0	0	0	0	0	0
61	STM0061	citF2	putativ bifunctional citrate lyase alpha chain/citrate-ACP transferase	-0.77118	0.603051	-0.6759	1.12145	0.862253	-0.72557	0.773789	0	0.553	0.686	0.042	0	0	0	0	0	0
3647	STM3767		putative cytoplasmic protein	-0.77119	0.603	-0.59763	1.80182	1.20241	-0.65307	1.08501	0	0.6	0.085	0.117	0	0	0	0	0	0
285	STM0292		putative RHS-family protein	-0.77123	0.602796	-0.65347	1.31643	0.959611	-0.69573	0.901884	0	0.526	0.224	0.126	0	0	0	0	0	0
898	STM0926		Fels-1 prophage; putative minor tail protein	-0.77179	0.599933	-0.61418	1.65796	1.12894	-0.69117	0.921458	0	0.583	0.234	0.104	0	0	0	0	0	0
3124	STM3227	yqjB	putative outer membrane protein	-0.77181	0.59983	-0.76607	0.337653	0.468742	-0.81763	0.378603	0	0.512	0.677	0.189	0	0	0	0	0	0
1437	STM1482	ydgF	putative membrane transporter of cations and cationic drugs	-0.77195	0.599115	-0.8713	-0.577059	0.0110281	-0.88597	0.0852403	0	0.448	0.825	0.158	1	1	0	0	0	2
1115	STM1149	mdoC	membrane protein required for succinyl substitution of glucan backbone of OPG (osmoregulated periplasmic glucan)	-0.77246	0.596508	-0.76545	0.343042	0.469775	-0.80801	0.419899	0	0.464	0.818	0	0	0	1	0	0	1
688	STM0708	ybfA	putative periplasmic protein	-0.77261	0.595741	-0.68563	1.03688	0.816309	-0.74655	0.683729	0	0.51	0.824	0	0	0	0	0	0	0
2528	STM2599		Gifsy-1 prophage	-0.77309	0.593287	-0.76426	0.353386	0.473336	-0.7872	0.50923	0	0.537	0.334	0.075	0	0	0	0	0	0
2970	STM3071		putative DNA-binding protein	-0.77319	0.592776	-0.75116	0.467258	0.530017	-0.77439	0.56422	0	0.562	0	0.142	0	0	0	0	0	0
872	STM0900		Fels-1 prophage; putative DNA or RNA helicases of superfamily II	-0.77323	0.592571	-0.6659	1.20838	0.900475	-0.67722	0.981341	0	0.529	0.201	0.156	0	0	0	0	0	0
1291	STM1330		putative DNA/RNA non-specific endonuclease	-0.77327	0.592367	-0.67348	1.14249	0.867429	-0.70845	0.84728	0	0.514	0	0.211	0	0	0	0	0	0
3738	STM3863		putative permease	-0.77335	0.591958	-0.788	0.147026	0.369492	-0.79194	0.488883	0	0.503	0.129	0.228	0	0	0	0	0	0
3692	STM3810	yidQ	putative outer membrane lipoprotein	-0.77351	0.59114	-0.68788	1.01732	0.804229	-0.73425	0.736529	0	0.522	0.811	0.207	0	0	0	0	0	0
4207	STM4372		resembles eukaryotic-type potassium channels	-0.77376	0.589862	-0.73507	0.60712	0.598491	-0.76696	0.596115	0	0.53	0.118	0.14	0	0	0	0	0	0
3030	STM3132		putative xylanase/chitin deacetylase	-0.77389	0.589197	-0.82243	-0.152256	0.21847	-0.83977	0.283563	0	0.473	0	0	1	0	0	0	0	1
4080	STM4240	yjbJ	putative cytoplasmic protein	-0.77391	0.589095	-0.81637	-0.0995799	0.244758	-0.83415	0.307688	0	0.448	0.943	0	1	1	0	0	0	2
311	STM0319	crl	transcriptional regulator of cryptic csgA gene for curli surface fibers	-0.77406	0.588328	-0.68499	1.04244	0.815384	-0.72931	0.757735	0	0.501	0.835	0	0	0	0	0	0	0
4048	STM4208		putative cytoplasmic protein	-0.77413	0.58797	-0.71755	0.759412	0.673691	-0.75596	0.643334	0	0.554	0	0	0	0	0	0	0	0
1979	STM2040	pduC	Propanediol utilization: dehydratase, large subunit	-0.77429	0.587152	-0.60872	1.70542	1.14628	-0.68027	0.968249	0	0.569	0	0	1	0	0	0	0	1
1041	STM1072	yccR	putative DNA transformation protein	-0.77467	0.58521	-0.65188	1.33025	0.957729	-0.69434	0.90785	0	0.502	0.751	0.124	0	0	0	0	0	0
371	STM0381		putative inner membrane protein	-0.77468	0.585158	-0.73835	0.578608	0.581883	-0.77993	0.540438	0	0.544	0	0	0	0	0	0	0	0
3522	STM3640	lpfA	long polar fimbria	-0.77487	0.584187	-0.74624	0.510025	0.547106	-0.75935	0.628782	0	0.465	0.348	0.202	0	0	0	0	0	0
59	STM0059	citD2	putative citrate lyase acyl carrier protein (gamma chain)	-0.77489	0.584085	-0.68857	1.01132	0.797703	-0.74542	0.688579	0	0.573	0.474	0.299	0	0	0	0	0	0
2117	STM2178		putative 1,2-dioxygenase protein	-0.77498	0.583625	-0.66633	1.20464	0.894133	-0.71282	0.828521	0	0.568	0.041	0.093	0	0	0	0	0	0
2224	STM2288		putative cytoplasmic protein	-0.77499	0.583574	-0.6675	1.19447	0.889023	-0.7204	0.795983	0	0.523	0.81	0	0	0	0	0	0	0
918	STM4311	tpnA_6	transposase for IS200	-0.77568	0.580046	-0.75317	0.449786	0.514916	-0.77134	0.577313	0	0.461	0	0	0	0	0	0	0	0
1997	STM2058	pduX	Propanediol utilization	-0.77573	0.579791	-0.69006	0.998369	0.78908	-0.74162	0.704892	0	0.559	0	0.123	0	0	0	0	0	0
2925	STM3024	yohM	putative inner membrane protein	-0.77607	0.578053	-0.66342	1.22994	0.903995	-0.70728	0.852303	0	0.539	0.75	0	0	0	0	0	0	0
1733	STM1782	ychH	putative inner membrane protein	-0.77647	0.576008	-0.75485	0.435182	0.505595	-0.80118	0.449218	0	0.507	0.913	0.217	0	0	0	0	0	0
520	STM0530	ylbE	putative cytoplasmic protein	-0.77719	0.572327	-0.68828	1.01384	0.793084	-0.74733	0.68038	0	0.572	0.747	0.043	0	0	0	0	0	0
3140	STM3243	tdcC	HAAAP family, L-threonine/ L-serine permease, anaerobically inducible	-0.77734	0.57156	-0.797	0.0687937	0.320177	-0.80869	0.41698	0	0.509	0.948	0.16	0	0	0	0	0	0
4396	STM4566	yjjI	putative cytoplasmic protein	-0.77751	0.570691	-0.6644	1.22142	0.896055	-0.71616	0.814184	0	0.543	0.897	0.064	0	0	0	0	0	0
4173	STM4335	ecnA	putative entericidin A precursor	-0.77751	0.570691	-0.6663	1.2049	0.887797	-0.71919	0.801177	0	0.534	0.586	0	0	0	0	0	0	0
2812	STM2907	pphB	serine/threonine specific protein phosphatase 2	-0.77752	0.57064	-0.82496	-0.174248	0.198196	-0.83574	0.300863	0	0.416	0.601	0.17	1	0	0	0	1	2
873	STM0901		Fels-1 prophage; putative phage DNA primase	-0.77767	0.569873	-0.74878	0.487946	0.528909	-0.78706	0.509831	0	0.521	0	0.081	0	0	0	0	0	0
4362	STM4529		putative cytoplasmic protein	-0.77773	0.569566	-0.67018	1.17118	0.870371	-0.72306	0.784564	0	0.526	0	0	0	0	0	0	0	0
1983	STM2044	pduH	Propanediol utilization: diol dehydratase reactivation	-0.77779	0.56926	-0.63963	1.43673	1.003	-0.69842	0.890336	0	0.583	0.121	0	0	0	0	0	0	0
174	STM0174	stiH	putative fimbriae	-0.77816	0.567368	-0.73254	0.629112	0.59824	-0.76978	0.584009	0	0.527	0.253	0	0	0	0	0	0	0
2418	STM2490	gcvR	transcriptional repressor of gcv operon	-0.77818	0.567266	-0.74128	0.553139	0.560203	-0.76743	0.594097	0	0.491	0.892	0.151	0	0	0	0	0	0
4424	STM4594	sthA	putative fimbrial chaparone protein	-0.77834	0.566448	-0.84295	-0.330626	0.117911	-0.86178	0.189081	0	0.461	0.308	0.167	1	0	0	0	0	1
2845	STM2940		putative cytoplasmic protein	-0.77845	0.565886	-0.7251	0.693784	0.629835	-0.77232	0.573106	0	0.58	0.222	0.117	0	0	0	0	0	0
1494	STM1539		putative hydrogenase-1 small subunit	-0.77898	0.563176	-0.71372	0.792705	0.67794	-0.75475	0.648528	0	0.519	0.728	0	0	0	0	0	0	0
845	STM0873	ybjC	putative inner membrane protein	-0.77899	0.563125	-0.70128	0.900839	0.731982	-0.77179	0.575381	0	0.534	0.594	0.156	0	0	0	0	0	0
2933	STM3033		putative nucleic acid-binding protein, contains PIN domain	-0.77909	0.562614	-0.78552	0.168584	0.365599	-0.8131	0.398049	0	0.503	0	0	0	0	0	0	0	0
3125	STM3228	yqjC	putative periplasmic protein	-0.77912	0.56246	-0.7112	0.81461	0.688535	-0.74811	0.677032	0	0.478	0.844	0.27	0	0	1	0	0	1
4089	STM4249	aphA	non-specific acid phosphatase/phosphotransferase, class B	-0.77917	0.562205	-0.59401	1.83328	1.19774	-0.66748	1.02315	0	0.516	0.89	0	0	0	0	0	0	0
2705	STM2795	ygaU	putative LysM domain	-0.77952	0.560415	-0.80121	0.0321983	0.296307	-0.81082	0.407837	0	0.443	0.94	0.201	0	0	0	0	0	0
1418	STM1460	ydgK	putative inner membrane protein	-0.77968	0.559598	-0.77748	0.238471	0.399034	-0.8321	0.316488	0	0.514	0.829	0.062	0	0	0	0	0	0
1305	STM1344	ydiV	putative Diguanylate cyclase/phosphodiesterase domain 1	-0.77974	0.559291	-0.88878	-0.729003	-0.0848563	-0.88933	0.0708169	0	0.461	0.519	0	0	0	0	0	0	0
677	STM0697	seqA	negative modulator of initiation of replication, inhibits open complex formation, mutation in gene alters cell membrane	-0.77983	0.558831	-0.7478	0.496464	0.527648	-0.79025	0.496138	0	0.513	0.883	0.128	0	0	0	0	0	0
2624	STM2712		Fels-2 prophage: similar to gpR for completion of tail, in phage P2	-0.77989	0.558524	-0.56423	2.09215	1.32533	-0.62482	1.20628	0	0.552	0	0	0	0	0	0	0	0
1276	STM1315	celD	transcriptional repressor of cel operon (AraC/XylS family)	-0.78036	0.556121	-0.79307	0.102955	0.329538	-0.80885	0.416293	0	0.431	0.857	0	0	0	0	0	1	1
403	STM0413	tsx	nucleoside channel; receptor of phage T6 and colicin K	-0.78071	0.554332	-0.70507	0.867895	0.711113	-0.75997	0.626121	0	0.513	0.836	0	0	0	0	0	0	0
2491	STM2563	yfhG	putative transcriptional regulator of two-component regulator protein (EBP familiiy)	-0.78074	0.554179	-0.68963	1.00211	0.778143	-0.76045	0.62406	0	0.579	0.606	0.154	0	0	0	0	0	0
787	STM0814	ybhQ	putative inner membrane protein	-0.78101	0.552798	-0.64803	1.36371	0.958256	-0.73686	0.725325	0	0.566	0.846	0	0	0	0	0	0	0
3112	STM3215	yqjI	putative transcriptional regulator	-0.78101	0.552798	-0.69164	0.984635	0.768717	-0.75815	0.633933	0	0.536	0.684	0.177	0	0	0	0	0	0
1705	STM1751	hns	DNA-binding protein HLP-II (HU, BH2, HD, NS); pleiotropic regulator	-0.78104	0.552645	-0.81087	-0.0517712	0.250437	-0.8424	0.272273	0	0.455	0.949	0.212	0	0	0	0	1	1
2476	STM2548	asrA	anaerobic sulfide reductase	-0.78155	0.550038	-0.68567	1.03653	0.793283	-0.73799	0.720474	0	0.527	0.081	0.061	0	0	0	0	0	0
2209	STM2273		putative dehydratase protein	-0.78178	0.548862	-0.80681	-0.0164796	0.266191	-0.8162	0.384742	0	0.432	0.295	0.228	0	0	1	0	0	1
2533	STM2604		Gifsy-1 prophage: similar to head protein gpshp of phage 21	-0.78185	0.548504	-0.6514	1.33442	0.941462	-0.73175	0.74726	0	0.591	0	0.2	0	0	0	0	0	0
326	STM0336	stbE	putative fimbriae; chaparone	-0.78198	0.547839	-0.83111	-0.227707	0.160066	-0.84797	0.248363	0	0.478	0.274	0.036	0	0	0	0	0	0
3937	STM4080		putative ribulose-5-phosphate 3-epimerase	-0.78238	0.545795	-0.78533	0.170235	0.358015	-0.79671	0.468407	0	0.517	0.24	0.228	0	1	0	0	0	1
1590	STM1636		putative ABC-type transport system probable membrane spanning protein	-0.78242	0.54559	-0.86699	-0.539594	0.0029981	-0.85712	0.209085	0	0.435	0.319	0	0	0	0	0	0	0
2682	STM2771	fljB	Flagellar synthesis: phase 2 flagellin (filament structural protein)	-0.78249	0.545232	-0.74405	0.529061	0.537147	-0.76536	0.602983	0	0.507	0.547	0.13	0	1	0	0	1	2
3091	STM3193		putative thiol-disulfide isomerase and thioredoxin	-0.78281	0.543596	-0.73311	0.624157	0.583877	-0.74842	0.675701	0	0.462	0.296	0.049	1	1	0	0	0	2
1019	STM1049		Gifsy-2 prophage; probable tail fiber protein	-0.78294	0.542932	-0.63521	1.47515	1.00904	-0.71544	0.817274	0	0.576	0.229	0.095	0	1	0	0	0	1
1880	STM1928	otsA	trehalose-6-phosphate synthase	-0.78322	0.5415	-0.66787	1.19126	0.866378	-0.67751	0.980097	0	0.526	0.888	0.047	0	0	0	0	0	0
1547	STM1593	srfA	ssrAB activated gene	-0.78329	0.541143	-0.57096	2.03365	1.28739	-0.63139	1.17808	0	0.555	0	0.134	0	1	0	0	0	1
4025	STM4185	aceK	isocitrate dehydrogenase kinase/phosphatase, also has ATPase activity	-0.78334	0.540887	-0.75443	0.438833	0.48986	-0.79133	0.491501	0	0.527	0.916	0.036	0	0	0	0	0	0
736	STM0761		fumarate hydratase Class I anaerobic	-0.78394	0.53782	-0.82408	-0.166599	0.18561	-0.84293	0.269998	0	0.426	0.343	0.061	0	0	0	0	0	0
4449	PSLT042		putative integrase protein	-0.78445	0.535212	-0.66371	1.22742	0.881314	-0.6998	0.884412	0	0.521	0.029	0.049	1	0	0	0	0	1
2710	STM2800		putative inner membrane protein	-0.78445	0.535212	-0.71432	0.787489	0.661351	-0.76903	0.587229	0	0.503	0.872	0	0	0	0	0	0	0
2517	STM2588		Gifsy-1 prophage: similar to tail fiber-like protein	-0.78488	0.533014	-0.64524	1.38797	0.96049	-0.72998	0.754859	0	0.579	0.233	0.103	0	1	0	0	0	1
4383	STM4550	fhuF	ferric hydrozamate transport, involved in reduction of ferric iron in cytoplasmic ferrioxamine B	-0.78521	0.531327	-0.68901	1.0075	0.769412	-0.75422	0.650804	0	0.571	0.733	0.107	0	0	0	0	0	0
1998	STM2059	yeeX	putative cytoplasmic protein	-0.78541	0.530305	-0.84845	-0.378435	0.0759348	-0.88673	0.0819779	0	0.469	0.919	0.207	0	0	0	0	0	0
3037	STM3139	gsp	bifunctional: glutathionylspermidine synthetase; glutathionylspermidine amidase	-0.78546	0.530049	-0.67954	1.08981	0.809932	-0.74061	0.709227	0	0.535	0.901	0.061	0	0	0	0	0	0
4423	STM4593	sthB	putative fimbrial usher protein	-0.78562	0.529231	-0.81844	-0.117573	0.205829	-0.83407	0.308031	0	0.472	0.402	0.045	0	0	0	0	1	1
902	STM0930	orfB	putative cytoplasmic protein	-0.78566	0.529027	-0.77372	0.271155	0.400091	-0.81159	0.404531	0	0.539	0.944	0.187	0	0	0	0	0	0
4058	STM4218		putative inner membrane protein	-0.78576	0.528515	-0.54731	2.23922	1.38387	-0.62195	1.2186	0	0.564	0	0.211	0	0	0	0	0	0
135	STM0135	yacA	putative inner membrane protein	-0.78606	0.526982	-0.55355	2.18498	1.35598	-0.63405	1.16666	0	0.582	0.718	0.12	0	0	0	0	0	0
1588	STM1634		putative amino acid ABC transporter permease component	-0.78613	0.526624	-0.83079	-0.224926	0.150849	-0.83266	0.314084	0	0.42	0.293	0	0	0	0	0	0	0
1987	STM2048	pduM	Propanediol utilization	-0.78619	0.526317	-0.57949	1.9595	1.24291	-0.66344	1.04049	0	0.613	0	0	0	0	0	0	0	0
889	STM0917		Fels-1 prophage; putative minor tail protein	-0.78638	0.525346	-0.67368	1.14075	0.833049	-0.74049	0.709742	0	0.584	0	0	0	0	0	0	0	0
233	STM0233		putative endochitinase	-0.78657	0.524375	-0.64118	1.42326	0.973816	-0.70093	0.879562	0	0.556	0.02	0.082	0	0	0	0	0	0
558	STM0571		putative inner membrane protein	-0.78667	0.523863	-0.66471	1.21872	0.871294	-0.70548	0.86003	0	0.516	0.095	0.078	0	0	0	0	0	0
4015	STM4171	yjaH	putative inner membrane protein	-0.7868	0.523199	-0.72119	0.727772	0.625485	-0.79477	0.476735	0	0.553	0.774	0.091	0	0	0	0	0	0
4431	PSLT001		putative cytoplasmic protein	-0.78702	0.522074	-0.69963	0.915182	0.718628	-0.76003	0.625863	0	0.535	0	0.17	0	0	0	0	0	0
1709	STM1755	ychJ	putative cytoplasmic protein	-0.78713	0.521512	-0.73474	0.609988	0.56575	-0.76159	0.619166	0	0.489	0.796	0.118	0	0	0	0	0	0
3588	STM3707	yibD	putative glycosyltransferase	-0.78726	0.520847	-0.7321	0.632937	0.576892	-0.75226	0.659217	0	0.481	0.802	0.131	1	0	0	0	0	1
4413	STM4583	trpR	transcriptional repressor for trp operon and aroH (TrpR family)	-0.78752	0.519518	-0.75863	0.402325	0.460921	-0.81118	0.406291	0	0.552	0.833	0.157	0	0	0	0	0	0
4274	STM4439	cybC	cytochrome b(562)	-0.78771	0.518547	-0.76304	0.363991	0.441269	-0.81244	0.400883	0	0.479	0.672	0.109	0	0	0	0	0	0
510	STM0520		putative permease	-0.78773	0.518444	-0.87543	-0.612959	-0.0472571	-0.87298	0.141002	0	0.461	0.234	0.214	1	1	0	0	0	2
508	STM0518	gip	glyoxylate -induced protein	-0.78779	0.518138	-0.79061	0.124339	0.321238	-0.79019	0.496395	0	0.457	0.841	0.399	1	0	0	0	0	1
4384	STM4551		putative diguanylate cyclase/phosphodiesterase domain 1	-0.78795	0.51732	-0.80893	-0.0349077	0.241206	-0.82196	0.360016	0	0.496	0.195	0	0	0	0	0	0	0
1172	STM1207	ycfM	putative outer membrane lipoprotein	-0.78799	0.517115	-0.7146	0.785055	0.651085	-0.791	0.492918	0	0.542	0.896	0.123	0	0	0	0	0	0
4457	PSLT060		putative cytoplasmic protein	-0.78803	0.516911	-0.64257	1.41118	0.964043	-0.71501	0.81912	0	0.557	0	0.192	0	0	0	0	0	0
1757	STM1806	nhaB	NhaB family of transport protein, Na+/H+ antiporter, regulator of intracellular pH	-0.78803	0.516911	-0.77101	0.294712	0.405811	-0.79973	0.455443	0	0.53	0.918	0.158	0	0	0	0	0	0
3246	STM3354		putative tartrate dehydratase beta subunit	-0.78837	0.515173	-0.8131	-0.0711554	0.222009	-0.84445	0.263473	0	0.467	0.688	0.063	0	0	0	0	0	0
4485	PSLT094	trbC	conjugative transfer: assembly	-0.7885	0.514508	-0.6124	1.67343	1.09397	-0.68132	0.963741	0	0.578	0	0	0	0	0	0	0	0
4440	PSLT027	ccdA	toxin addiction system: antidote	-0.78894	0.512259	-0.65451	1.30739	0.909823	-0.71301	0.827706	0	0.541	0	0	1	0	1	0	0	2
2610	STM2698		Fels-2 prophage: similar to gpE in phage P2	-0.78896	0.512156	-0.60026	1.77895	1.14556	-0.68293	0.95683	0	0.588	0	0	0	0	0	0	0	0
1004	STM1034		Gifsy-2 prophage; putative RecA/RadA recombinase	-0.78928	0.51052	-0.70563	0.863027	0.686774	-0.77116	0.578085	0	0.529	0	0	0	0	0	0	0	0
2297	STM2361		putative regulatory protein	-0.7894	0.509907	-0.85006	-0.39243	0.0587385	-0.8482	0.247376	0	0.521	0.295	0.135	0	1	0	0	0	1
2809	STM2904		putative ABC-type transport system	-0.78943	0.509754	-0.78265	0.193531	0.351642	-0.82991	0.325889	0	0.479	0	0	0	0	0	0	0	0
3717	STM3841		putative inner membrane protein	-0.78953	0.509242	-0.79583	0.0789639	0.294103	-0.81358	0.395989	0	0.556	0	0	0	0	0	0	0	0
1011	STM1041		Gifsy-2 prophage; probable minor tail protein	-0.78967	0.508527	-0.66917	1.17996	0.844241	-0.72999	0.754816	0	0.563	0	0.138	0	0	0	0	0	0
3250	STM3358		putative regulatory protein, gntR family	-0.78975	0.508118	-0.82781	-0.199022	0.154548	-0.84423	0.264418	0	0.491	0.215	0.182	0	0	0	0	0	0
4129	STM4289	phnA	putative alkylphosphonate uptake protein in phosphonate metabolism	-0.79062	0.50367	-0.77983	0.218044	0.360857	-0.80449	0.43501	0	0.496	0.964	0.189	0	0	0	0	0	0
591	STM0604	ybdM	putative transcriptional regulator	-0.79129	0.500245	-0.69545	0.951516	0.725881	-0.75124	0.663596	0	0.515	0.771	0.117	0	1	0	0	0	1
2334	STM2399	pgtP	Phosphoglycerate transport: transporter	-0.79129	0.500245	-0.86382	-0.512039	-0.00589688	-0.84333	0.268281	0	0.498	0.354	0.235	0	0	0	0	0	0
3902	STM4045	rhaD	rhamnulose-1-phosphate aldolase	-0.79132	0.500092	-0.67783	1.10468	0.802385	-0.72128	0.792205	0	0.556	0.913	0.135	0	0	0	0	0	0
4065	STM4225	yjbH	putative outer membrane lipoprotein	-0.79141	0.499631	-0.71992	0.738811	0.619221	-0.7806	0.537562	0	0.544	0.923	0.085	0	0	0	0	0	0
3374	STM3490	yrfB	putative inner membrane protein	-0.79144	0.499478	-0.63316	1.49297	0.996225	-0.72677	0.768638	0	0.592	0.459	0	0	0	0	0	0	0
1828	STM1876	holE	DNA polymerase III, theta subunit	-0.79166	0.498353	-0.76766	0.323832	0.411092	-0.82588	0.343189	0	0.53	0.882	0	0	0	0	0	0	0
3401	STM3517		putative DNA-damage-inducibile protein, resembles dinJ	-0.79173	0.497996	-0.77967	0.219435	0.358715	-0.81113	0.406506	0	0.462	0.837	0.244	0	0	0	0	0	0
2655	STM2744		putative cytoplasmic protein	-0.79214	0.4959	-0.73986	0.565483	0.530691	-0.80057	0.451837	0	0.558	0.211	0.183	0	0	0	0	0	0
2463	STM2535	sseB	enhances serine sensitivity	-0.79265	0.493292	-0.60379	1.74827	1.12078	-0.67168	1.00512	0	0.552	0.904	0.195	0	0	0	0	0	0
999	STM1029		Gifsy-2 prophage	-0.79268	0.493139	-0.74071	0.558094	0.525617	-0.80417	0.436383	0	0.545	0.579	0.189	0	0	0	0	0	0
4284	STM4449		putative helix-turn-helix protein, copG family	-0.79271	0.492986	-0.72783	0.670054	0.58152	-0.78365	0.524469	0	0.5	0.463	0.237	0	0	0	0	0	0
972	STM1002		putatiave diaminopropionate ammonia lyase	-0.79272	0.492935	-0.749	0.486033	0.489484	-0.76675	0.597016	0	0.456	0.488	0.129	1	0	0	0	0	1
4334	STM4501		putative cytoplasmic protein	-0.793	0.491503	-0.65279	1.32234	0.906921	-0.71143	0.834488	0	0.533	0.247	0	0	0	0	0	0	0
42	STM0042		putative sodium galactoside symporter	-0.79317	0.490634	-0.82716	-0.193372	0.148631	-0.82762	0.335719	0	0.491	0.284	0.188	0	0	0	0	0	0
1719	STM1768	ychP	putative invasin	-0.79328	0.490072	-0.76605	0.337826	0.413949	-0.83027	0.324344	0	0.535	0.684	0	0	0	0	0	0	0
1964	STM2025	cbiK	synthesis of vitamin B12 adenosyl cobalamide precursor	-0.79348	0.489049	-0.6766	1.11537	0.80221	-0.73374	0.738718	0	0.558	0	0	0	0	0	0	0	0
4446	PSLT033		putative inner membrane protein	-0.7935	0.488947	-0.60737	1.71715	1.10305	-0.71268	0.829122	0	0.689	0	0.174	0	1	1	0	0	2
374	STM0384	psiF	induced by phosphate starvation	-0.79354	0.488743	-0.74585	0.513415	0.501079	-0.80479	0.433722	0	0.512	0.906	0.189	0	0	0	0	0	0
3280	STM3388		putative membrane domain involved in signal transduction; Diguanylate cyclase/phosphodiesterase domain 1; Diguanylate cyclase/phosphodiesterase domain 2	-0.7936	0.488436	-0.75843	0.404063	0.44625	-0.78079	0.536746	0	0.542	0.233	0	0	0	0	0	0	0
1118	STM1152	yceK	putative outer membrane lipoprotein	-0.79365	0.48818	-0.75927	0.396762	0.442471	-0.80866	0.417109	0	0.529	0.88	0	0	0	1	0	0	1
4488	PSLT097	traF	conjugative transfer: assembly	-0.7942	0.485368	-0.68729	1.02245	0.753908	-0.75174	0.661449	0	0.533	0	0.076	0	0	0	0	0	0
3431	STM3549		putative inner membrane protein	-0.79442	0.484244	-0.59326	1.8398	1.16202	-0.6586	1.06127	0	0.521	0	0.068	0	0	0	0	0	0
3363	STM3478	bigA	putative surface-exposed virulence protein	-0.7945	0.483835	-0.66379	1.22672	0.855278	-0.73798	0.720517	0	0.574	0.097	0.098	1	0	0	0	0	1
870	STM0898A		putative protein	-0.79461	0.483272	-0.77104	0.294451	0.388862	-0.83241	0.315157	0	0.484	0.19	0.238	0	0	0	0	0	0
3369	STM3485	damX	membrane protein	-0.79487	0.481943	-0.70567	0.862679	0.672311	-0.77966	0.541597	0	0.575	0.798	0.148	0	0	0	0	0	0
3793	STM3927		putative inner membrane protein	-0.79528	0.479847	-0.70954	0.829039	0.654443	-0.78585	0.515025	0	0.55	0.825	0	0	0	0	0	0	0
4464	PSLT068		putative ParB-like nuclease domain	-0.79573	0.477547	-0.61491	1.65161	1.06458	-0.65923	1.05857	0	0.586	0	0	0	0	0	0	0	0
4009	STM4165	rsd	regulator of sigma D, has binding activity to the major sigma subunit of RNAP	-0.79578	0.477291	-0.85004	-0.392256	0.0425175	-0.88789	0.0769983	0	0.498	0.889	0.167	0	0	1	0	0	1
4371	STM4538		putative PTS permease	-0.7958	0.477189	-0.76271	0.366859	0.422024	-0.80092	0.450334	0	0.496	0.406	0.079	0	0	0	0	0	0
2536	STM2607		Gifsy-1 prophage: similar to head to tail joining protein	-0.79585	0.476933	-0.65657	1.28948	0.883207	-0.73878	0.717083	0	0.581	0	0	0	0	0	0	0	0
3490	STM3608	yhjD	putative tRNA-processing ribonuclease	-0.79587	0.476831	-0.7466	0.506895	0.491863	-0.78241	0.529792	0	0.511	0.854	0.111	0	0	0	0	0	0
2631	STM2719		Fels-2 prophage: similar to gpR in phage 186	-0.7962	0.475144	-0.55841	2.14274	1.30894	-0.64291	1.12862	0	0.619	0	0	0	0	0	0	0	0
2347	STM2414	yfeD	putative negative regulator	-0.79628	0.474735	-0.73659	0.593907	0.534321	-0.81331	0.397148	0	0.485	0.7	0.177	0	0	0	0	0	0
273	STM0280		putative outer membrane lipoprotein	-0.79678	0.472179	-0.71725	0.76202	0.6171	-0.77303	0.570058	0	0.53	0	0.112	0	0	0	0	0	0
3278	STM3386	yhdJ	putative methyltransferase	-0.79691	0.471514	-0.79277	0.105563	0.288539	-0.82735	0.336878	0	0.455	0.772	0	0	0	0	0	0	0
1989	STM2050	pduO	Propanediol utilization: B12 related	-0.79732	0.469418	-0.6567	1.28835	0.878885	-0.72813	0.7628	0	0.615	0	0.188	0	0	0	0	0	0
2693	STM2783	nxiA	putative nickel transporter	-0.7974	0.469009	-0.71728	0.761759	0.615384	-0.75951	0.628095	0	0.503	0	0	0	0	0	0	0	0
2620	STM2708		Fels-2 prophage: similar to tail fiber protein (gpI) in phage P2	-0.79748	0.4686	-0.68272	1.06217	0.765386	-0.74946	0.671237	0	0.588	0	0.103	0	0	0	0	0	0
283	STM0290		putative cytoplasmic protein	-0.79799	0.465993	-0.72036	0.734986	0.60049	-0.7769	0.553445	0	0.516	0	0.155	1	0	0	0	0	1
1542	STM1588	yncC	putative regulatory protein, gntR family	-0.79822	0.464817	-0.91277	-0.937536	-0.236359	-0.91237	-0.0280869	0	0.471	0.584	0	0	0	0	0	0	0
1639	STM1686	pspE	phage shock protein	-0.79829	0.46446	-0.85804	-0.461796	0.00133175	-0.87871	0.116405	0	0.43	0.663	0.25	0	0	0	0	0	0
25	STM0025	bcfE	fimbrial subunit	-0.79872	0.462261	-0.81122	-0.0548135	0.203724	-0.83854	0.288843	0	0.495	0.376	0.166	0	0	0	0	0	0
2879	STM2976	fucI	L-fucose isomerase	-0.79919	0.459859	-0.65248	1.32503	0.892446	-0.74607	0.685789	0	0.576	0.937	0	0	0	0	0	0	0
2108	STM2169	yohC	paral putative transport protein	-0.79924	0.459603	-0.61738	1.63014	1.04487	-0.68527	0.946785	0	0.549	0.918	0.159	0	0	0	0	0	0
3383	STM3499	yhgE	putative inner membrane protein	-0.79924	0.459603	-0.71077	0.818347	0.638975	-0.77895	0.544645	0	0.551	0.564	0.062	0	0	0	0	0	0
963	STM0993	mukE	putative chromosome partitioning	-0.79978	0.456842	-0.74471	0.523324	0.490083	-0.80824	0.418912	0	0.536	0.957	0.115	0	0	0	0	0	0
3807	STM3946	yifL	putative outer membrane lipoprotein	-0.79999	0.455769	-0.7612	0.379985	0.417877	-0.82918	0.329023	0	0.537	0	0.164	0	0	0	0	0	0
4282	STM4447		putative periplasmic protein	-0.80005	0.455462	-0.69883	0.922136	0.688799	-0.78355	0.524899	0	0.585	0	0	0	0	0	0	0	0
2611	STM2699		Fels-2 prophage: similar to genes in P2-like phages	-0.80038	0.453775	-0.69203	0.981245	0.71751	-0.775	0.561601	0	0.56	0	0	0	0	0	0	0	0
3633	STM3753	sugR	ATP binding protein	-0.80078	0.45173	-0.76129	0.379203	0.415466	-0.79479	0.476649	0	0.498	0	0.126	1	0	0	0	0	1
2050	STM2111	wcaE	putative transferase in colanic acid biosynthesis	-0.80097	0.450759	-0.83265	-0.241094	0.104833	-0.84343	0.267852	0	0.488	0.718	0.149	0	0	0	0	1	1
1272	STM1311	osmE	transcriptional activator of ntrL gene	-0.80099	0.450657	-0.73314	0.623896	0.537277	-0.79339	0.482658	0	0.507	0.956	0.088	0	0	0	0	0	0
864	STM0893		Fels-1 prophage; putative integrase	-0.80137	0.448714	-0.81228	-0.0640276	0.192343	-0.84224	0.27296	0	0.473	0.499	0.111	0	0	0	0	0	0
4304	STM4470	yjgD	putative cytoplasmic protein	-0.80158	0.44764	-0.85183	-0.407816	0.0199124	-0.91451	-0.0372733	0	0.51	0.812	0.232	0	0	0	0	0	0
2687	STM2776	iroE	putative hydrolase of the alpha/beta superfamily	-0.80236	0.443653	-0.70507	0.867895	0.655774	-0.75362	0.653379	0	0.534	0.141	0.148	0	0	0	0	0	0
743	STM0769		putative cytoplasmic protein	-0.80248	0.443039	-0.65153	1.33329	0.888165	-0.72825	0.762285	0	0.597	0.224	0.155	0	0	0	0	0	0
1015	STM1045		Gifsy-2 prophage; probable minor tail protein	-0.80259	0.442477	-0.70565	0.862853	0.652665	-0.76409	0.608435	0	0.538	0	0	0	0	0	0	0	0
2630	STM2718		Fels-2 prophage: similar to gpQ in phage 186	-0.80261	0.442375	-0.69399	0.964208	0.703291	-0.77956	0.542027	0	0.597	0	0	0	0	0	0	0	0
3173	STM3277		putative inner membrane protein	-0.80264	0.442222	-0.73998	0.56444	0.503331	-0.79847	0.460852	0	0.466	0.423	0	1	0	0	0	0	1
1038	STM1069	ycbG	putative cytoplasmic protein	-0.8027	0.441915	-0.78553	0.168497	0.305206	-0.85205	0.230849	0	0.469	0.893	0.22	1	0	0	0	0	1
637	STM0650		putative hydrolase C-terminus	-0.8028	0.441404	-0.73245	0.629894	0.535649	-0.76423	0.607834	0	0.526	0.351	0	0	0	0	0	0	0
1328	STM1368		putative Na+-dicarboxylate symporter	-0.80297	0.440535	-0.95872	-1.33696	-0.448211	-0.95502	-0.211171	0	0.48	0.446	0.232	0	0	1	0	0	1
2633	STM2721		Fels-2 prophage: similar to gpO, capsid scaffold, in phage P2	-0.80322	0.439256	-0.65077	1.3399	0.889577	-0.7385	0.718285	0	0.583	0	0.181	0	0	0	0	0	0
2899	STM2998	ygdB	putative periplasmic protein	-0.80354	0.437621	-0.62856	1.53296	0.985289	-0.71248	0.829981	0	0.565	0.422	0	0	0	0	0	0	0
3523	STM3641	yhjY	putative lipase	-0.80359	0.437365	-0.66948	1.17726	0.807313	-0.7545	0.649602	0	0.548	0.726	0.085	0	0	0	0	0	0
4356	STM4523	yjiW	LexA regulated, putative SOS response	-0.8036	0.437314	-0.65507	1.30252	0.869917	-0.73497	0.733438	0	0.554	0.791	0.173	1	0	0	0	0	1
339	STM0349		putative outer membrane lipoprotein	-0.80366	0.437007	-0.79374	0.0971313	0.267069	-0.85332	0.225397	0	0.496	0.345	0.151	0	0	0	0	0	0
2714	STM2804		putative cytoplasmic protein	-0.80372	0.4367	-0.73893	0.573567	0.505134	-0.78526	0.517558	0	0.522	0.273	0.126	0	0	0	0	0	0
3441	STM3559	yhhV	putative cytoplasmic protein	-0.80416	0.434451	-0.65897	1.26862	0.851535	-0.71695	0.810792	0	0.546	0.28	0	0	0	0	0	0	0
4490	PSLT099	trbB	conjugative transfer	-0.8045	0.432713	-0.75646	0.421187	0.42695	-0.83281	0.31344	0	0.568	0.11	0.104	0	0	0	0	0	0
1426	STM1470	tus	replication termination protein	-0.8045	0.432713	-0.76616	0.33687	0.384792	-0.83484	0.304726	0	0.533	0.799	0.113	0	0	0	0	0	0
3455	STM3573	yhhL	putative inner membrane protein	-0.80487	0.430821	-0.72784	0.669967	0.550394	-0.79251	0.486436	0	0.489	0.856	0.211	0	0	0	0	0	0
1490	STM1535		putative hydrogenase protein	-0.80492	0.430566	-0.76295	0.364773	0.397669	-0.82568	0.344047	0	0.562	0.293	0.253	0	0	0	0	0	0
4421	STM4591	sthE	putative major fimbrial subunit	-0.80494	0.430464	-0.71924	0.744722	0.587593	-0.78495	0.518889	0	0.525	0.147	0.141	0	0	0	0	0	0
1433	STM1478	ydgH	putative periplasmic protein	-0.80514	0.429441	-0.60393	1.74705	1.08825	-0.69496	0.905189	0	0.535	0.901	0	0	0	0	0	0	0
290	STM0297		putative transposase	-0.8053	0.428623	-0.74715	0.502115	0.465369	-0.8101	0.410927	0	0.528	0.246	0.215	0	0	0	0	0	0
1767	STM1816	minE	cell division topological specificity factor, reverses MinC inhibition of FtsZ ring formation	-0.80539	0.428163	-0.82974	-0.215799	0.106182	-0.84394	0.265663	0	0.436	0.977	0.193	1	1	0	0	0	2
321	STM0331		putative fumarylacetoacetate (FAA) hydrolase	-0.80539	0.428163	-0.84503	-0.348707	0.0397281	-0.84372	0.266607	0	0.499	0.24	0.318	0	0	0	0	0	0
799	STM0827	ybiO	paral putative transport protein	-0.80548	0.427703	-0.61436	1.65639	1.04205	-0.69508	0.904674	0	0.544	0.859	0	0	0	0	0	0	0
1222	STM1260		putative inner membrane protein	-0.80564	0.426885	-0.81069	-0.0502065	0.188339	-0.85286	0.227372	0	0.484	0.151	0.093	0	0	0	0	0	0
1138	STM1172	flgM	anti-FliA (anti-sigma) factor; also known as RflB protein	-0.80586	0.42576	-0.69645	0.942824	0.684292	-0.74568	0.687463	0	0.519	0.804	0.134	0	0	0	0	0	0
1911	STM1964	yedD	putative outer membrane lipoprotein	-0.80656	0.422182	-0.64244	1.41231	0.917244	-0.75781	0.635393	0	0.591	0.816	0.177	0	0	0	0	0	0
3010	STM3111	yggX	putative cytoplasmic protein	-0.80656	0.422182	-0.79302	0.10339	0.262786	-0.83771	0.292406	0	0.473	0.945	0	0	0	0	0	0	0
2765	STM2860	ygbA	putative cytoplasmic protein	-0.80695	0.420188	-0.62812	1.53678	0.978485	-0.71661	0.812252	0	0.541	0.868	0.096	0	0	0	0	0	0
4281	STM4446		putative selenocysteine synthase [L-seryl-tRNA(Ser) selenium transferase	-0.80754	0.417172	-0.63435	1.48263	0.9499	-0.68078	0.966059	0	0.565	0.124	0.126	0	0	0	0	0	0
3110	STM3212	mug	DNA glycosylase, G/U mismatch specific	-0.80798	0.414922	-0.67587	1.12172	0.768319	-0.74621	0.685188	0	0.532	0.804	0.292	0	0	0	0	0	0
3290	STM3404	smg	putative cytoplasmic protein	-0.80799	0.414871	-0.84213	-0.323499	0.0456864	-0.88293	0.0982901	0	0.48	0.943	0.204	0	0	0	0	0	0
946	STM0976	ycaP	putative inner membrane protein	-0.8081	0.414309	-0.666	1.20751	0.81091	-0.75505	0.647241	0	0.516	0.861	0.07	0	0	0	0	0	0
4498	PSLT110	traX	conjugative transfer: fimbrial acetylation	-0.80811	0.414258	-0.49414	2.7014	1.55783	-0.58971	1.357	0	0.608	0	0.114	0	0	0	0	0	0
1345	STM1385	ttrB	Tetrathionate reductase complex, subunit B	-0.80828	0.413389	-0.77549	0.255769	0.334579	-0.80699	0.424278	0	0.564	0.34	0.104	0	0	0	0	0	0
2613	STM2701		Fels-2 prophage: similar to tail sheath proteins in phage P2	-0.80868	0.411344	-0.74114	0.554356	0.48285	-0.8065	0.426381	0	0.58	0	0.156	0	0	1	0	0	1
3379	STM3495	yrfF	putative inner membrane protein	-0.80895	0.409964	-0.7224	0.717254	0.563609	-0.81203	0.402643	0	0.551	0.839	0	0	0	0	0	0	0
2019	STM2080	udg	UDP-glucose/GDP-mannose dehydrogenase	-0.80902	0.409606	-0.85311	-0.418942	-0.00466818	-0.85173	0.232222	0	0.441	0.889	0.265	1	1	0	0	0	2
2079	STM2141	fbaB	3-oxoacyl-[acyl-carrier-protein] synthase I	-0.80903	0.409555	-0.8225	-0.152865	0.128345	-0.88901	0.0721905	0	0.53	0.96	0.063	0	0	0	0	0	0
4275	STM4440		putative cytoplasmic protein	-0.80908	0.409299	-0.66345	1.22968	0.819488	-0.74845	0.675572	0	0.55	0	0	0	0	1	0	0	1
4436	PSLT006	repA	DNA replication	-0.8091	0.409197	-0.61077	1.6876	1.0484	-0.69798	0.892225	0	0.571	0	0.113	0	0	0	0	0	0
1351	STM1391	ssrB	Secretion system regulator: transcriptonal activator, homologous with degU/uvrY/bvgA	-0.80913	0.409043	-0.8497	-0.389301	0.00987135	-0.85621	0.212991	0	0.397	0.297	0.113	1	1	0	0	1	3
1985	STM2046	pduK	Propanediol utilization: polyhedral bodies	-0.80917	0.408839	-0.75699	0.41658	0.41271	-0.8396	0.284293	0	0.56	0.188	0.163	0	0	1	0	0	1
1014	STM1044	sodC	Gifsy-2 prophage: superoxide dismutase precursor (Cu-Zn)	-0.80919	0.408737	-0.85462	-0.432068	-0.0116655	-0.87414	0.136023	0	0.488	0.537	0.243	1	1	0	0	0	2
3989	STM4139	coaA	pantothenate kinase	-0.80948	0.407254	-0.77156	0.289931	0.348592	-0.77868	0.545804	0	0.456	0.956	0.155	0	0	0	0	0	0
3686	STM3803	yidF	putative cytoplasmic protein	-0.80959	0.406692	-0.71961	0.741506	0.574099	-0.79155	0.490557	0	0.521	0.477	0.142	0	0	0	0	0	0
2350	STM2421	xapB	MFS superfamily, xanthosine permease	-0.81004	0.404391	-0.72788	0.669619	0.537005	-0.78435	0.521464	0	0.49	0.888	0.156	0	0	0	0	0	0
4148	STM4308		putative component of anaerobic dehydrogenases	-0.81007	0.404238	-0.6638	1.22663	0.815436	-0.72679	0.768552	0	0.534	0.286	0.157	0	0	0	0	0	0
2205	STM2269	yojN	putative sensor/kinase in regulatory system	-0.81018	0.403676	-0.73687	0.591473	0.497574	-0.82472	0.348168	0	0.514	0.849	0	0	0	0	0	0	0
4305	STM4471	miaE	hydroxylase for synthesis of 2-methylthio-cis-ribozeatin in tRNA	-0.81047	0.402193	-0.74452	0.524976	0.463584	-0.81722	0.380363	0	0.544	0	0	0	0	0	0	0	0
1977	STM2038	pduA	Propanediol utilization: polyhedral bodies	-0.81059	0.40158	-0.73229	0.631285	0.516432	-0.79632	0.470081	0	0.539	0.628	0.234	0	0	0	0	0	0
882	STM0910		Fels-1 prophage	-0.8106	0.401528	-0.68264	1.06287	0.732198	-0.7479	0.677933	0	0.567	0.031	0.05	0	0	0	0	0	0
401	STM0411	yajD	putative cytoplasmic protein	-0.81131	0.397899	-0.71713	0.763063	0.580481	-0.80304	0.441234	0	0.499	0.965	0.261	0	0	0	0	0	0
879	STM0907		Fels-1 prophage; putative chitinase	-0.81141	0.397388	-0.73144	0.638674	0.518031	-0.77643	0.555463	0	0.536	0	0.083	1	0	0	0	0	1
2855	STM2950		putative metal-dependent hydrolases of the beta-lactamase superfamily II	-0.81155	0.396672	-0.77926	0.222999	0.309835	-0.83357	0.310178	0	0.514	0.087	0.117	0	0	0	0	0	0
2294	STM2358		putative cytoplasmic protein	-0.81169	0.395956	-0.79299	0.103651	0.249803	-0.82654	0.340355	0	0.507	0.185	0.112	0	0	0	0	0	0
156	STM0156		putative periplasmic protein	-0.81195	0.394627	-0.72036	0.734986	0.564807	-0.80859	0.417409	0	0.568	0	0.087	0	0	0	0	0	0
4474	PSLT081	traB	conjugative transfer: assembly	-0.812	0.394371	-0.60711	1.71941	1.05689	-0.68397	0.952366	0	0.58	0.044	0.116	0	0	0	0	0	0
3051	STM3153	yqhA	putative membrane-associated protein	-0.81218	0.393451	-0.86108	-0.488221	-0.047385	-0.90103	0.0205923	0	0.492	0.945	0	1	0	0	0	0	1
353	STM0363		putative transcription regulator, AraC family	-0.81236	0.392531	-0.58343	1.92525	1.15889	-0.66259	1.04414	0	0.581	0.195	0.105	0	0	0	0	0	0
2230	STM2294	yfaZ	putative inner membrane protein	-0.81264	0.3911	-0.73713	0.589213	0.490156	-0.81364	0.395731	0	0.521	0.721	0.079	0	0	0	0	0	0
2502	STM2574		putative permease	-0.8127	0.390793	-0.89904	-0.818188	-0.213698	-0.90037	0.0234255	0	0.465	0.259	0.256	0	0	0	0	0	0
1820	STM1869		Homology to phage-tail assembly proteins	-0.81281	0.390231	-0.67172	1.15779	0.77401	-0.75233	0.658917	0	0.523	0.599	0.169	0	0	0	0	0	0
3671	STM3791		putative cytoplasmic protein	-0.81283	0.390128	-0.64015	1.43221	0.91117	-0.72253	0.786839	0	0.558	0	0.095	0	0	0	0	0	0
3651	STM3771		putative phosphotransferase system enzyme IIB	-0.81294	0.389566	-0.71085	0.817652	0.603609	-0.78377	0.523954	0	0.52	0.335	0	0	0	0	0	0	0
2523	STM2594		Gifsy-1 prophage: similar to phage tail component H	-0.81334	0.387521	-0.65598	1.29461	0.841065	-0.74162	0.704892	0	0.564	0	0.133	0	0	0	0	0	0
1972	STM2033	cbiC	synthesis of vitamin B12 adenosyl cobalamide precursor	-0.81355	0.386448	-0.73317	0.623636	0.505042	-0.78742	0.508286	0	0.555	0	0	0	0	0	0	0	0
1908	STM1961	fliS	flagellar biosynthesis; repressor of class 3a and 3b operons (RflA activity)	-0.81356	0.386396	-0.82274	-0.154951	0.115723	-0.8631	0.183414	0	0.501	0.578	0	0	0	0	0	0	0
4339	STM4506		putative dienelactone hydrolase	-0.81362	0.38609	-0.72133	0.726555	0.556322	-0.77412	0.565379	0	0.539	0.192	0.165	0	0	0	0	0	0
1589	STM1635		putative ABC-type polar amino acid transport system, ATPase component	-0.81381	0.385118	-0.88684	-0.71214	-0.163511	-0.89511	0.0460051	0	0.435	0.391	0	0	0	0	0	0	0
1482	STM1527		putative inner membrane protein	-0.81384	0.384965	-0.73308	0.624418	0.504691	-0.80513	0.432262	0	0.46	0.832	0.105	0	0	0	0	0	0
894	STM0922		Fels-1 prophage; putative tail assembly protein	-0.81395	0.384403	-0.76262	0.367642	0.376022	-0.82995	0.325717	0	0.559	0.119	0.275	0	0	0	0	0	0
4066	STM4226	yjbA	putative inner membrane protein	-0.81401	0.384096	-0.79584	0.078877	0.231486	-0.85621	0.212991	0	0.459	0.875	0.096	0	0	1	0	0	1
2683	STM2772	hin	H inversion: regulation of flagellar gene expression by site-specific inversion of DNA	-0.81436	0.382307	-0.84588	-0.356095	0.0131056	-0.87709	0.12336	0	0.463	0.626	0.153	0	0	0	0	0	0
1083	STM1115	scsC	Suppression of copper sensitivity: lipoprotein modification in lgt mutants of E. coli	-0.81446	0.381795	-0.84978	-0.389996	-0.00410034	-0.88735	0.0793164	0	0.523	0.155	0.111	0	0	0	0	0	0
3928	STM4071		putative Mannose-6-phosphate isomerase	-0.81476	0.380262	-0.78817	0.145548	0.262905	-0.83789	0.291633	0	0.489	0.182	0.205	0	0	0	0	0	0
2618	STM2706		Fels-2 prophage: similar to tail fiber protein in phage P2	-0.81493	0.379393	-0.68109	1.07634	0.727867	-0.76195	0.617621	0	0.525	0	0.057	1	0	0	0	0	1
2547	STM2619		Gifsy-1 prophage	-0.81501	0.378984	-0.72711	0.676312	0.527648	-0.81932	0.371349	0	0.583	0	0.103	0	0	0	0	0	0
1248	STM1287		arylsulfatase regulator	-0.81518	0.378115	-0.79744	0.064969	0.221542	-0.83541	0.302279	0	0.5	0.455	0.121	0	0	0	0	0	0
2384	STM2455	eutK	putative carboxysome structural protein, ethanolamine utilization	-0.8153	0.377501	-0.71204	0.807308	0.592405	-0.81498	0.389979	0	0.603	0.805	0.177	0	0	0	0	0	0
2002	STM2063	phsC	Hydrogen sulfide production: membrane anchoring protein	-0.81557	0.376121	-0.79502	0.0860049	0.231063	-0.86292	0.184187	0	0.518	0.535	0	0	0	0	0	0	0
4441	PSLT028	ccdB	toxin addiction system: toxin	-0.81566	0.375661	-0.56161	2.11492	1.24529	-0.66313	1.04183	0	0.58	0	0.158	0	0	0	0	0	0
3672	STM3792		putative L-fucose permease	-0.81566	0.375661	-0.77068	0.29758	0.33662	-0.81944	0.370834	0	0.523	0.329	0.164	0	0	0	0	0	0
1533	STM1579	narW	nitrate reductase 2, delta subunit, assembly function	-0.81571	0.375405	-0.64813	1.36285	0.869125	-0.71969	0.79903	0	0.56	0.823	0	0	0	0	0	0	0
3462	STM3580		putative inner membrane lipoprotein	-0.8158	0.374945	-0.73557	0.602774	0.488859	-0.81911	0.37225	0	0.531	0.8	0.114	0	0	0	0	0	0
2478	STM2550	asrC	anaerobic sulfide reductase	-0.81598	0.374025	-0.74974	0.479601	0.426813	-0.8145	0.39204	0	0.56	0.148	0	0	0	0	0	0	0
28	STM0028	bcfH	putative thiol-disulfide isomerase	-0.81604	0.373718	-0.69817	0.927873	0.650796	-0.7522	0.659475	0	0.55	0.093	0.114	1	0	0	0	0	1
829	STM0857		putative acyl-CoA dehydrogenase	-0.8161	0.373411	-0.83675	-0.276733	0.0483393	-0.86325	0.18277	0	0.432	0.271	0.3	1	1	0	0	0	2
3169	STM3273	yhbT	putative lipid carrier protein	-0.81611	0.37336	-0.78413	0.180666	0.277013	-0.84276	0.270728	0	0.515	0.914	0.132	0	0	0	0	0	0
4175	STM4337	ecnR	putative bacterial regulatory protein, luxR family	-0.81634	0.372184	-0.89369	-0.771684	-0.19975	-0.92128	-0.0663349	0	0.467	0.205	0	1	0	0	0	0	1
3533	STM3651		putative acetyltransferase	-0.81665	0.3706	-0.77894	0.22578	0.29819	-0.8271	0.337952	0	0.489	0.124	0.186	0	0	0	0	0	0
1253	STM1292	yeaC	putative cytoplasmic protein	-0.81669	0.370395	-0.68395	1.05148	0.710938	-0.76015	0.625348	0	0.496	0.859	0	0	0	0	0	0	0
3765	STM3898	yifE	putative LysR type transcriptional regulator with pssR	-0.81671	0.370293	-0.71931	0.744114	0.557203	-0.79391	0.480426	0	0.491	0.955	0	0	0	0	0	0	0
553	STM0566		putative inner membrane protein	-0.81674	0.37014	-0.7243	0.700738	0.535439	-0.81201	0.402728	0	0.512	0.839	0.097	0	0	0	0	0	0
2541	STM2612		Gifsy-1 prophage: similar to morphogenesis protein of phage B103	-0.81686	0.369526	-0.71907	0.7462	0.557863	-0.77783	0.549453	0	0.529	0.347	0.12	0	0	0	0	0	0
1110	STM1144	csgA	curlin major subunit, coiled surface structures; cryptic	-0.81703	0.368657	-0.78562	0.167714	0.268186	-0.86446	0.177576	0	0.516	0.748	0.152	0	0	0	0	0	0
1235	STM1274	yeaQ	putative inner membrane protein	-0.81704	0.368606	-0.7287	0.662491	0.515549	-0.77662	0.554647	0	0.464	0.951	0	0	0	0	0	0	0
2621	STM2709		Fels-2 prophage: similar to gpJ, base plate of tail, in phage P2	-0.81721	0.367737	-0.7377	0.584259	0.475998	-0.80421	0.436211	0	0.571	0	0	0	0	0	0	0	0
4042	STM4202		putative phage baseplate protein	-0.81728	0.367379	-0.64929	1.35276	0.860071	-0.72984	0.75546	0	0.583	0	0.089	0	0	0	0	0	0
2625	STM2713		Fels-2 prophage: similar to protein from phage CTX	-0.81745	0.36651	-0.63724	1.45751	0.912008	-0.74753	0.679522	0	0.609	0	0.223	0	0	0	0	0	0
2247	STM2311	elaB	putative inner membrane protein	-0.81749	0.366305	-0.79863	0.054625	0.210465	-0.86334	0.182384	0	0.518	0.709	0.214	0	0	0	0	0	0
512	STM0522	allP	putative NCS1 family, allantoin transport protein	-0.81756	0.365948	-0.7983	0.0574935	0.211721	-0.84516	0.260425	0	0.46	0.924	0.114	0	0	0	0	0	0
2096	STM2157	yehS	putative cytoplasmic protein	-0.81768	0.365334	-0.68974	1.00115	0.683242	-0.76423	0.607834	0	0.507	0.903	0	0	0	0	0	0	0
3515	STM3632		putative PQQ enzyme repeat	-0.81771	0.365181	-0.68628	1.03123	0.698204	-0.77027	0.581906	0	0.577	0	0	0	0	0	0	0	0
1999	STM2060	yeeA	putative inner membrane protein	-0.81781	0.36467	-0.74226	0.544621	0.454645	-0.81787	0.377573	0	0.536	0.798	0.108	0	0	0	0	0	0
3472	STM3590	uspB	universal stress protein B, involved in stationary-phase resistance to ethanol	-0.81786	0.364414	-0.74674	0.505678	0.435046	-0.82467	0.348383	0	0.504	0.955	0	0	0	0	0	0	0
305	STM0312	yafK	putative periplasmic protein	-0.81831	0.362113	-0.71291	0.799746	0.58093	-0.77201	0.574436	0	0.486	0.907	0	0	0	0	0	0	0
4301	STM4467		putative arginine deiminase	-0.81856	0.360835	-0.84259	-0.327497	0.0166692	-0.88892	0.0725769	0	0.529	0.057	0.123	0	1	0	0	0	1
1359	STM1399	sscA	Secretion chaperone and relative of lcrH regulator	-0.81893	0.358944	-0.79837	0.056885	0.207914	-0.87207	0.144909	0	0.507	0.159	0.166	0	0	0	0	0	0
1261	STM1300		putative periplasmic protein	-0.81898	0.358688	-0.75962	0.393719	0.376204	-0.83752	0.293222	0	0.549	0.725	0.242	0	0	0	0	0	0
2363	STM2434		putative cytoplasmic protein	-0.81906	0.358279	-0.65041	1.34303	0.850653	-0.75361	0.653422	0	0.586	0	0	0	0	0	0	0	0
2959	STM3060	ygfE	putative cytoplasmic protein	-0.81958	0.355621	-0.8636	-0.510126	-0.0772527	-0.92274	-0.0726022	0	0.477	0.963	0.193	1	0	0	0	0	1
3747	STM3872	atpI	membrane-bound ATP synthase subunit, F1-F0-type proton-ATPase	-0.81964	0.355314	-0.84398	-0.33958	0.00786731	-0.89195	0.05957	0	0.516	0.913	0	0	0	0	0	0	0
571	STM0584	entD	enterochelin synthetase, component D (phoshpantetheinyltransferase)	-0.81974	0.354803	-0.80424	0.00586007	0.180332	-0.86781	0.163196	0	0.56	0.453	0.098	0	0	0	0	0	0
265	STM0273		putative cytoplasmic protein	-0.81988	0.354087	-0.69522	0.953516	0.653802	-0.75621	0.642261	0	0.55	0	0.122	0	0	0	0	0	0
4091	STM4251	yjbR	putative cytoplasmic protein	-0.81992	0.353883	-0.76027	0.388069	0.370976	-0.81161	0.404445	0	0.522	0.915	0.186	0	0	0	0	0	0
2396	STM2467	eutT	putative cobalamin adenosyltransferase, ethanolamine utilization	-0.82009	0.353014	-0.66746	1.19482	0.773917	-0.77105	0.578557	0	0.592	0.88	0.12	0	0	0	0	0	0
3048	STM3150	hypO	putative Ni/Fe hydrogenases, small subunit	-0.82012	0.35286	-0.6685	1.18578	0.76932	-0.74331	0.697637	0	0.543	0.968	0	0	0	0	0	0	0
2555	STM2636		Gifsy-1 prophage: similar to integrase in phage	-0.8203	0.35194	-0.82153	-0.144433	0.103754	-0.84861	0.245616	0	0.503	0.23	0	0	1	0	0	0	1
4159	STM4320		putative bacterial regulatory protein, merR family	-0.82034	0.351736	-0.83812	-0.288642	0.031547	-0.87948	0.1131	0	0.476	0.291	0.218	0	0	0	0	0	0
4043	STM4203		putative phage baseplate protein	-0.82039	0.35148	-0.70289	0.886844	0.619162	-0.79711	0.46669	0	0.577	0.101	0.202	0	0	0	0	0	0
2662	STM2751		putative PTS enzyme III glucitol	-0.82092	0.348771	-0.69389	0.965077	0.656924	-0.79615	0.470811	0	0.599	0.355	0.169	0	0	0	0	0	0
959	STM0989		mukF protein (killing factor KicB)	-0.82103	0.348208	-0.69557	0.950473	0.649341	-0.79269	0.485663	0	0.554	0.909	0.051	0	0	0	0	0	0
2923	STM3022		putative transport protein	-0.82167	0.344936	-0.71094	0.81687	0.580903	-0.7613	0.620411	0	0.47	0.9	0.166	0	0	0	0	0	0
1603	STM1649		putative cytoplasmic protein	-0.82194	0.343556	-0.71198	0.80783	0.575693	-0.80462	0.434451	0	0.574	0	0	0	0	0	0	0	0
1104	STM1138	ycdZ	putative inner membrane protein	-0.82207	0.342892	-0.65494	1.30365	0.823271	-0.74845	0.675572	0	0.526	0.852	0.119	0	0	0	0	0	0
1485	STM1530		putative outer membrane protein	-0.82258	0.340284	-0.79919	0.0497572	0.195021	-0.8472	0.251668	0	0.464	0.632	0	1	1	0	0	0	2
991	STM1021		Gifsy-2 prophage	-0.8228	0.33916	-0.72641	0.682397	0.510778	-0.82911	0.329323	0	0.588	0	0.103	0	0	0	0	0	0
3153	STM3257		putative tagatose 6-phosphate kinase 1	-0.82283	0.339006	-0.71944	0.742984	0.540995	-0.79711	0.46669	0	0.516	0.723	0	0	0	0	0	0	0
2271	STM2335	yfbU	putative cytoplasmic protein	-0.82287	0.338802	-0.67177	1.15735	0.748078	-0.74841	0.675744	0	0.526	0.957	0.134	0	0	0	0	0	0
2049	STM2110	wcaF	putative acyltransferase in colanic acid biosynthesis	-0.82291	0.338597	-0.77865	0.228301	0.283449	-0.81154	0.404746	0	0.509	0.853	0.163	0	0	0	0	0	0
3041	STM3143	hybG	hydrogenase-2 operon protein	-0.82315	0.33737	-0.74901	0.485947	0.411658	-0.81058	0.408867	0	0.528	0.939	0	0	0	0	0	0	0
3414	STM3532		putative dihydrodipicolinate synthetase	-0.82316	0.337319	-0.8435	-0.335407	0.000956044	-0.85749	0.207496	0	0.472	0.422	0.262	0	0	0	0	0	0
161	STM0161	kdgT	2-keto-3-deoxygluconate permease	-0.82317	0.337268	-0.61831	1.62206	0.979662	-0.71859	0.803752	0	0.576	0.454	0	0	0	0	0	0	0
2029	STM2090	rfbH	LPS side chain defect: CDP-6deoxy-D-xylo-4-hexulose-3-dehydrase	-0.82353	0.335428	-0.82349	-0.16147	0.0869787	-0.84568	0.258193	0	0.446	0.268	0.149	0	0	0	0	1	1
243	STM0244	rcsF	regulator in colanic acid synthesis; overexpression confers mucoid phenotype, increases capsule synthesis	-0.82364	0.334865	-0.72437	0.70013	0.517498	-0.82277	0.356539	0	0.542	0.91	0.261	1	0	0	0	0	1
1455	STM1500	ynfD	putative outer membrane protein	-0.82365	0.334814	-0.68242	1.06478	0.699797	-0.78029	0.538893	0	0.549	0.716	0.118	0	0	0	0	0	0
1175	STM1210	ycfP	putative esterase	-0.82369	0.33461	-0.73071	0.645019	0.489815	-0.78879	0.502405	0	0.478	0.944	0.144	0	0	0	0	0	0
1491	STM1536		putative hydrogenase maturation protease	-0.82383	0.333894	-0.70053	0.907359	0.620626	-0.77465	0.563104	0	0.533	0.47	0	0	0	0	0	0	0
1832	STM1880	yebE	putative inner membrane protein	-0.82411	0.332463	-0.7645	0.3513	0.341881	-0.84134	0.276824	0	0.533	0.858	0.128	0	0	0	0	0	0
1095	STM1128		putative sodium/glucose cotransporter	-0.82416	0.332207	-0.84841	-0.378087	-0.0229401	-0.88489	0.0898764	0	0.454	0.207	0.283	0	0	0	0	0	0
3570	STM3689	yibL	putative cytoplasmic protein	-0.82441	0.330929	-0.79032	0.12686	0.228894	-0.88937	0.0706451	0	0.508	0.9	0.2	0	0	0	0	0	0
611	STM0624	citC	citrate lyase synthetase (citrate (pro-3S)-lyase ligase	-0.82452	0.330367	-0.73455	0.61164	0.471003	-0.82213	0.359286	0	0.517	0.852	0	0	0	0	0	1	1
459	STM0469	rpmE2	putative 50S ribosomal protein L31 (second copy)	-0.8248	0.328935	-0.82718	-0.193546	0.0676948	-0.85487	0.218743	0	0.442	0.744	0	0	0	0	0	0	0
3608	STM3727	rpmG	50S ribosomal subunit protein L33	-0.8251	0.327402	-0.88778	-0.720311	-0.196455	-0.91202	-0.0265845	0	0.401	1	0.364	0	0	0	0	0	0
3917	STM4060	cpxP	periplasmic repressor of cpx regulon by interaction with CpxA, rescue from transitory stresses	-0.82537	0.326021	-0.68598	1.03383	0.679928	-0.76965	0.584567	0	0.508	0.801	0.205	0	0	0	0	0	0
2634	STM2722		Fels-2 prophage: similar to gpP, ATP charging, in phage P2	-0.82562	0.324743	-0.74429	0.526975	0.425859	-0.84209	0.273604	0	0.569	0	0	0	0	0	0	0	0
2437	STM2509		putative IS3-like transposase	-0.82572	0.324232	-0.81877	-0.120442	0.101895	-0.85305	0.226556	0	0.475	0.441	0.169	0	0	0	0	0	0
1971	STM2032	cbiD	synthesis of vitamin B12 adenosyl cobalamide precursor	-0.82583	0.32367	-0.72879	0.661709	0.492689	-0.79126	0.491802	0	0.558	0	0	0	0	0	0	0	0
2582	STM2668		putative cytoplasmic protein	-0.82583	0.32367	-0.76646	0.334262	0.328966	-0.81697	0.381437	0	0.539	0	0.272	0	0	0	0	0	0
891	STM0919		Fels-1 prophage; putative minor tail protein	-0.82609	0.322341	-0.80011	0.0417601	0.18205	-0.87154	0.147184	0	0.556	0	0.11	0	0	0	0	0	0
679	STM0699		putative cytoplasmic protein	-0.82637	0.320909	-0.81956	-0.127309	0.0968001	-0.88593	0.085412	0	0.509	0	0.112	0	0	0	0	0	0
2676	STM2765		putative transposase	-0.82641	0.320705	-0.82187	-0.147389	0.0866581	-0.8659	0.171395	0	0.474	0.239	0.227	1	0	0	0	0	1
3693	STM3811	yidR	putative cytoplasmic protein	-0.82648	0.320347	-0.65481	1.30478	0.812563	-0.76281	0.613929	0	0.582	0.792	0	0	0	0	0	0	0
896	STM0924		Fels-1 prophage; putative Cu/Zn superoxide dismutase	-0.82665	0.319478	-0.78362	0.185099	0.252289	-0.81731	0.379977	0	0.487	0.557	0.259	0	0	0	0	0	0
3483	STM3601		putative phosphosugar isomerase	-0.82691	0.318149	-0.72493	0.695262	0.506705	-0.76934	0.585898	0	0.504	0.231	0.194	0	0	0	0	0	0
1798	STM1847	yebR	putative GAF domain-containing protein	-0.82701	0.317637	-0.82576	-0.181202	0.0682175	-0.883	0.0979896	0	0.512	0.747	0.165	0	0	0	0	0	0
2532	STM2603		Gifsy-1 prophage: similar to head protein gp7 of phage 21	-0.82715	0.316922	-0.67732	1.10911	0.713017	-0.772	0.574479	0	0.538	0	0.12	0	0	0	0	0	0
1002	STM1032		Gifsy-2 prophage	-0.82722	0.316564	-0.70516	0.867112	0.591838	-0.78723	0.509102	0	0.569	0	0.046	0	0	0	0	0	0
2518	STM2589		Gifsy-1 prophage: similar to host specificity protein-J in phage lambda	-0.82731	0.316104	-0.64345	1.40353	0.859815	-0.72865	0.760568	0	0.57	0	0.206	0	0	0	0	0	0
588	STM0601	ybdD	putative cytoplasmic protein	-0.82741	0.315593	-0.83946	-0.30029	0.00765147	-0.89356	0.0526587	0	0.528	0.754	0	0	0	0	0	0	0
4165	STM4327	fxsA	suppresses F exclusion of bacteriophage T7	-0.82747	0.315286	-0.79777	0.0621005	0.188693	-0.85131	0.234025	0	0.493	0.673	0.164	0	0	0	0	0	0
56	STM0056		putative oxalacetate decarboxylase, subunit gamma	-0.82751	0.315081	-0.75584	0.426577	0.370829	-0.84473	0.262271	0	0.577	0	0.253	0	0	0	0	0	0
3007	STM3108	yggL	putative cytoplasmic protein	-0.82753	0.314979	-0.76648	0.334089	0.324534	-0.83259	0.314385	0	0.479	0.954	0	0	0	0	0	0	0
456	STM0465	ybaY	glycoprotein/polysaccharide metabolism	-0.82768	0.314212	-0.7446	0.52428	0.419246	-0.82007	0.368129	0	0.541	0.889	0.148	0	0	0	0	0	0
4448	PSLT036		putative transposase, IS200-like	-0.82833	0.310889	-0.75695	0.416928	0.363909	-0.82427	0.3501	0	0.506	0.172	0.115	0	0	0	0	0	0
2280	STM2344		putative phosphotransferase system	-0.82835	0.310787	-0.84331	-0.333756	-0.0114843	-0.91606	-0.043927	0	0.499	0.388	0.102	0	0	0	0	0	0
3147	STM3251		putative sugar kinase, ribokinase family	-0.82849	0.310071	-0.82618	-0.184853	0.062609	-0.83559	0.301507	0	0.483	0.241	0.229	0	0	0	0	0	0
2534	STM2605		Gifsy-1 prophage: similar to head-tail preconnector gp5 of phage 21	-0.82853	0.309867	-0.6891	1.00671	0.65829	-0.77063	0.58036	0	0.566	0.133	0.106	0	0	0	0	0	0
53	STM0053		putative transcription regulator, histidine kinase for citrate	-0.82862	0.309407	-0.7539	0.44344	0.376423	-0.80018	0.453511	0	0.481	0.417	0.071	0	0	0	0	1	1
1762	STM1811	ycgN	putative cytoplasmic protein	-0.82866	0.309202	-0.8279	-0.199804	0.054699	-0.87119	0.148686	0	0.492	0.922	0.092	0	1	0	0	0	1
1994	STM2055	pduU	Propanediol utilization: polyhedral bodies	-0.82909	0.307004	-0.73218	0.632241	0.469623	-0.82825	0.333015	0	0.557	0.534	0	0	0	0	0	0	0
886	STM0914		Fels-1 prophage; putative phage tail component	-0.82918	0.306544	-0.7575	0.412147	0.359346	-0.84846	0.246259	0	0.587	0	0	0	0	1	0	0	1
945	STM0975	ycaO	putative cytoplasmic protein	-0.82948	0.30501	-0.81804	-0.114096	0.095457	-0.89842	0.0317962	0	0.528	0.932	0	0	0	0	0	0	0
3348	STM3463	yheU	putative cytoplasmic protein	-0.83008	0.301943	-0.75381	0.444223	0.373083	-0.82589	0.343146	0	0.51	0.853	0.206	0	0	0	0	0	0
4367	STM4534		putative NtrC family transcriptional regulators, ATPase domain	-0.83011	0.30179	-0.72443	0.699608	0.500699	-0.79568	0.472828	0	0.548	0.104	0.068	0	0	0	0	0	0
1898	STM1950	sdiA	transcriptional regulator of ftsQAZ gene cluster (LuxR/UhpA family)	-0.83054	0.299591	-0.82231	-0.151213	0.074189	-0.87694	0.124003	0	0.492	0.713	0.075	0	0	0	0	0	0
1936	STM1991	vsr	DNA mismatch endonuclease, patch repair protein	-0.83062	0.299182	-0.71515	0.780274	0.539728	-0.80332	0.440032	0	0.562	0.865	0.16	0	0	0	0	0	0
2387	STM2458	eutB	ethanolamine ammonia-lyase, heavy chain	-0.83082	0.29816	-0.64918	1.35372	0.825939	-0.75397	0.651877	0	0.571	0.98	0	0	0	0	0	0	0
266	STM0274		putative cytoplasmic protein	-0.83082	0.29816	-0.80486	0.000470726	0.149315	-0.85349	0.224667	0	0.547	0	0	0	0	0	0	0	0
1267	STM1306	astB	succinylarginine dihydrolase	-0.83105	0.296984	-0.69571	0.949256	0.62312	-0.78559	0.516142	0	0.561	0.85	0.06	0	0	0	0	0	0
2759	STM2854	hypA	guanine-nucleotide binding protein in formate-hydrogenlyase system, functions as nickel donor for HycE of hydrogenlyase 3	-0.83109	0.29678	-0.75679	0.418319	0.357549	-0.83816	0.290474	0	0.483	0.847	0.186	0	0	0	0	0	0
3113	STM3216		putative methyl-accepting chemotaxis protein	-0.83109	0.29678	-0.78284	0.191879	0.24433	-0.82869	0.331126	0	0.505	0.338	0.136	0	0	0	0	0	0
4214	STM4379	yjfO	putative lipoprotein	-0.83114	0.296524	-0.69593	0.947344	0.621934	-0.78107	0.535545	0	0.52	0.789	0.147	0	0	0	0	0	0
366	STM0376	sbmA	putative ABC superfamily transporter	-0.83115	0.296473	-0.72565	0.689003	0.492738	-0.78607	0.514081	0	0.516	0.924	0.131	0	0	0	0	0	0
272	STM0279		putative cytoplasmic protein	-0.83138	0.295297	-0.78854	0.142332	0.218815	-0.84015	0.281932	0	0.499	0.137	0.062	0	0	0	0	0	0
4502	PSLT010	srgB	sdiA-regulated gene; putative outer membrane protein	-0.83156	0.294377	-0.71716	0.762802	0.52859	-0.80881	0.416465	0	0.601	0.301	0.147	0	0	0	0	0	0
4502	PSLT010	srgB	putative outer membrane protein	-0.83156	0.294377	-0.71716	0.762802	0.52859	-0.80881	0.416465	0	0.614	0.5	0	0	0	0	0	0	0
4497	PSLT108	traI	conjugative transfer: oriT nicking-unwinding	-0.83173	0.293508	-0.61112	1.68455	0.989031	-0.72452	0.778297	0	0.615	0	0	0	0	1	0	0	1
310	STM0318	yafA	putative hydrolase of the alpha/beta superfamily	-0.83176	0.293354	-0.70772	0.84486	0.569107	-0.79161	0.490299	0	0.551	0.896	0.116	0	0	0	0	0	0
4051	STM4211		putative phage tail protein	-0.83176	0.293354	-0.71791	0.756283	0.524819	-0.81151	0.404875	0	0.585	0	0.11	0	0	1	0	0	1
3281	STM3389	envR	transcriptional repressor for envCD (acrEF) (TetR/AcrR family)	-0.83192	0.292537	-0.88276	-0.676675	-0.192069	-0.91963	-0.0592519	0	0.434	0.659	0	0	0	0	0	0	0
3697	STM3821	torD	cytoplasmic chaperone which interacts with TorA	-0.83231	0.290543	-0.7917	0.114864	0.202703	-0.87693	0.124046	0	0.478	0.586	0.114	1	0	0	0	0	1
1513	STM1559		putative glycosyl hydrolase	-0.83261	0.289009	-0.66651	1.20308	0.746043	-0.73932	0.714765	0	0.545	0	0	0	0	0	0	0	0
1171	STM1206	ycfL	putative outer membrane lipoprotein	-0.83276	0.288242	-0.71192	0.808351	0.548297	-0.81999	0.368473	0	0.578	0.782	0.194	0	0	0	0	0	0
2565	STM2646	yfiD	putative formate acetyltransferase	-0.83282	0.287936	-0.76683	0.331046	0.309491	-0.85402	0.222392	0	0.499	0.961	0	1	0	0	0	0	1
3014	STM3115	yqgA	putative inner membrane protein	-0.8331	0.286504	-0.75294	0.451785	0.369145	-0.84046	0.280601	0	0.516	0.843	0	0	0	1	0	0	1
1883	STM1932	ftnB	ferritin-like protein	-0.83323	0.28584	-0.80602	-0.00961257	0.138113	-0.86033	0.195305	0	0.495	0.766	0.204	0	0	0	0	0	0
975	STM1005		Gifsy-2 prophage; integrase	-0.83329	0.285533	-0.82965	-0.215016	0.0352583	-0.88675	0.081892	0	0.488	0.495	0.123	0	0	0	0	0	0
3006	STM3107	yggN	putative periplasmic protein	-0.83339	0.285022	-0.73723	0.588344	0.436683	-0.84876	0.244972	0	0.549	0.874	0.167	0	0	0	0	0	0
2316	STM2380	yfcL	putative cytoplasmic protein	-0.83352	0.284357	-0.69509	0.954646	0.619501	-0.78987	0.497769	0	0.535	0.857	0	0	0	0	0	0	0
500	STM0510	sfbA	putative ABC-type transport system ATPase component/cell division protein	-0.83374	0.283232	-0.61907	1.61545	0.949341	-0.66573	1.03066	0	0.527	0.341	0	0	0	0	0	0	0
1800	STM1849		putative inner membrane protein	-0.83388	0.282517	-0.75199	0.460043	0.37128	-0.82007	0.368129	0	0.547	0.906	0	0	0	0	0	0	0
883	STM0911		Fels-1 prophage	-0.83406	0.281596	-0.68928	1.00515	0.643373	-0.7868	0.510947	0	0.605	0	0	0	0	0	0	0	0
3507	STM3624A		putative protein	-0.83426	0.280574	-0.85392	-0.425983	-0.0727045	-0.86995	0.154009	0	0.486	0.457	0.435	0	0	0	0	0	0
2661	STM2750		putative PTS system, glucitol/sorbitol-specific enzyme II	-0.83434	0.280165	-0.64628	1.37893	0.829546	-0.76532	0.603155	0	0.597	0.358	0.11	0	0	0	0	0	0
3404	STM3521		putative ribonucleoprotein related-protein	-0.83492	0.2772	-0.59288	1.84311	1.06015	-0.69426	0.908194	0	0.603	0.044	0.139	0	0	0	0	0	0
857	STM0886		putative sulfatase	-0.83499	0.276842	-0.70342	0.882237	0.57954	-0.76544	0.602639	0	0.519	0.188	0.182	0	0	0	0	0	0
3134	STM3237	yhaL	putative cytoplasmic protein	-0.83503	0.276638	-0.53795	2.32058	1.29861	-0.66502	1.03371	0	0.604	0.667	0.333	0	0	0	0	0	0
2945	STM3046	ygfX	putative inner membrane protein	-0.83534	0.275053	-0.66494	1.21672	0.745889	-0.77525	0.560528	0	0.552	0.803	0	0	0	0	0	0	0
670	STM0690	citB	citrate utilization protein b	-0.8358	0.272701	-0.75168	0.462738	0.367719	-0.85549	0.216082	0	0.576	0.09	0.032	0	0	0	0	0	0
3152	STM3256		putative phosphotransferase system mannitol/fructose-specific IIA domain	-0.83669	0.268151	-0.80777	-0.0248244	0.121663	-0.88196	0.102454	0	0.533	0.295	0.134	0	0	0	0	0	0
964	STM0994	mukB	kinesin-line cell division protein involved in sister chromosome partitioning	-0.83709	0.266106	-0.69251	0.977072	0.621589	-0.77857	0.546276	0	0.567	0.946	0.145	0	0	1	0	0	1
4240	STM4405	ytfJ	putative transcriptional regulator	-0.83722	0.265442	-0.66604	1.20716	0.736302	-0.7741	0.565465	0	0.51	0.843	0.13	0	0	0	0	0	0
367	STM0377	yaiW	putative outer membrane lipoprotein	-0.83733	0.26488	-0.6676	1.1936	0.729241	-0.78081	0.536661	0	0.554	0.827	0.058	0	0	0	0	0	0
2980	STM3081		putative malate/L-lactate dehydrogenase	-0.83745	0.264266	-0.8027	0.0192465	0.141756	-0.85747	0.207582	0	0.511	0.4	0	0	0	0	0	0	0
1659	STM1705	osmB	osmotically inducible lipoprotein	-0.8376	0.263499	-0.64943	1.35155	0.807522	-0.77307	0.569886	0	0.592	0.958	0	0	0	0	0	0	0
3587	STM3706	yigQ	putative periplasmic protein	-0.83785	0.262221	-0.75292	0.451959	0.35709	-0.84394	0.265663	0	0.562	0.706	0	0	0	0	0	0	0
4524	PSLT046		putative carbonic anhydrase	-0.83788	0.262068	-0.82027	-0.133481	0.0642936	-0.85722	0.208655	0	0.493	0.199	0.069	1	0	1	0	0	2
2663	STM2752		putative PTS enzyme III glucitol	-0.83789	0.262017	-0.67129	1.16153	0.711772	-0.78615	0.513738	0	0.629	0.445	0	0	0	0	0	0	0
3136	STM3239	yhaO	putative HAAAP family transport protein	-0.83817	0.260585	-0.70984	0.826431	0.543508	-0.78142	0.534042	0	0.503	0.962	0.063	0	0	0	0	0	0
1322	STM1361	ydiM	putative MFS family transport protein	-0.8382	0.260432	-0.79531	0.083484	0.171958	-0.84843	0.246388	0	0.469	0.779	0.186	0	0	0	0	0	0
1238	STM1277	yeaO	putative cytoplasmic protein	-0.83833	0.259767	-0.77551	0.255595	0.257681	-0.84518	0.26034	0	0.516	0.739	0.157	0	0	0	0	0	0
1035	STM1066	rmf	ribosome modulation factor (involved in dimerization of 70S ribosomes)	-0.83837	0.259563	-0.77341	0.27385	0.266706	-0.86217	0.187407	0	0.539	0.927	0	0	0	0	0	0	0
4117	STM4277	nrfA	nitrite reductase periplasmic cytochrome c(552)	-0.83842	0.259307	-0.72744	0.673444	0.466375	-0.81809	0.376629	0	0.54	0.9	0	0	0	0	0	0	0
2481	STM2553	csiE	stationary phase inducible protein	-0.83845	0.259154	-0.59632	1.8132	1.03618	-0.69656	0.898321	0	0.55	0.718	0	0	0	0	0	0	0
3907	STM4050	rhaT	DMT Superfamily, L-rhamnose:H+ symporter protein	-0.83847	0.259052	-0.68825	1.0141	0.636577	-0.78716	0.509402	0	0.526	0.916	0	0	0	0	0	0	0
2660	STM2749		putative cytoplasmic protein	-0.8386	0.258387	-0.75506	0.433357	0.345872	-0.85369	0.223809	0	0.57	0.436	0	0	0	0	0	0	0
4499	PSLT111	finO	conjugative transfer: regulation	-0.83861	0.258336	-0.65888	1.2694	0.763868	-0.78419	0.522151	0	0.588	0	0.139	0	0	0	0	0	0
519	STM0529	fdrA	putative acyl-CoA synthetase, involved in protein transport;	-0.8387	0.257876	-0.65852	1.27253	0.765203	-0.77198	0.574565	0	0.573	0.83	0.081	0	0	0	0	0	0
4157	STM4318		putative acetyltransferase	-0.83921	0.255269	-0.7418	0.548619	0.401944	-0.81821	0.376114	0	0.572	0.129	0.196	0	0	0	0	0	0
3769	STM3902	ilvM	acetolactate synthase II, small subunit	-0.83938	0.2544	-0.79898	0.0515826	0.152991	-0.8744	0.134907	0	0.496	0.93	0	0	0	0	0	0	0
1984	STM2045	pduJ	Propanediol utilization: polyhedral bodies	-0.83945	0.254042	-0.74127	0.553226	0.403634	-0.82662	0.340012	0	0.564	0.604	0	0	0	0	0	0	0
2579	STM2665	yfiA	ribosome associated factor, stabilizes ribosomes against dissociation	-0.83946	0.253991	-0.83809	-0.288381	-0.0171951	-0.88645	0.0831798	0	0.47	0.92	0.107	0	0	0	0	0	0
1640	STM1687	pspD	phage shock protein	-0.83957	0.253428	-0.69241	0.977942	0.615685	-0.81351	0.396289	0	0.564	0.875	0	0	0	0	0	0	0
1016	STM1046		Gifsy-2 prophage; probable tail assembly protein	-0.83957	0.253428	-0.72017	0.736638	0.495033	-0.81432	0.392812	0	0.547	0.122	0.278	0	0	0	0	0	0
10	STM0010	htgA	positive regulator for sigma H (sigma 32) promoters, permitting growth at high temperature	-0.83971	0.252713	-0.63182	1.50462	0.878666	-0.74051	0.709656	0	0.544	0.873	0	0	0	0	0	0	0
3254	STM3362		putative periplasmic protein	-0.83998	0.251332	-0.76726	0.327308	0.28932	-0.85733	0.208183	0	0.504	0.534	0	0	0	0	0	0	0
3427	STM3545	yhhX	putative oxidoreductase	-0.84026	0.249901	-0.88064	-0.658246	-0.204173	-0.93152	-0.110292	0	0.508	0.922	0.168	0	0	0	0	0	0
4047	STM4207		putative phage baseplate component	-0.84044	0.248981	-0.73358	0.620072	0.434526	-0.8355	0.301893	0	0.582	0.133	0.146	0	0	0	0	0	0
4016	STM4172	zraP	zinc-resistance associated protein	-0.84051	0.248623	-0.69098	0.990372	0.619497	-0.80364	0.438658	0	0.56	0.523	0.146	0	0	0	0	0	0
2393	STM2464	eutN	putative detox protein in ethanolamine utilization	-0.84055	0.248418	-0.77776	0.236037	0.242228	-0.87827	0.118294	0	0.572	0.879	0.192	0	0	0	0	0	0
1568	STM1614		putative PTS system enzyme IIC component	-0.84058	0.248265	-0.70823	0.840426	0.544346	-0.79916	0.45789	0	0.522	0.95	0	0	0	0	0	0	0
1363	STM1403	sscB	Secretion system chaparone	-0.8408	0.24714	-0.81887	-0.121311	0.0629146	-0.8865	0.0829652	0	0.477	0.215	0.25	0	1	0	0	0	1
3026	STM3128		putative oxidoreductase	-0.84095	0.246373	-0.94261	-1.19692	-0.475273	-0.97339	-0.290027	0	0.494	0.342	0.224	1	0	0	0	0	1
1231	STM1270	yeaS	paral putative transport protein	-0.84106	0.245811	-0.89729	-0.802976	-0.278583	-0.94238	-0.156911	0	0.469	0.873	0	0	0	0	0	0	0
841	STM0869		paral putative regulator (TetR/Acr family)	-0.84129	0.244635	-0.77435	0.265679	0.255157	-0.85834	0.203848	0	0.518	0.68	0.146	0	0	0	0	0	0
36	STM0036		putative arylsulfatase regulatory protein	-0.84136	0.244277	-0.84628	-0.359572	-0.0576475	-0.90791	-0.00894151	0	0.497	0.462	0.119	0	0	0	0	1	1
4013	STM4169	yjaG	putative cytoplasmic protein	-0.84145	0.243817	-0.76271	0.366859	0.305338	-0.84502	0.261026	0	0.5	0.949	0.112	1	0	0	0	0	1
2764	STM2859	fhlA	formate hydrogen-lyase transcriptional activator for fdhF, hyc and hyp operons (EBP family)	-0.84163	0.242897	-0.81405	-0.0794133	0.0817419	-0.8929	0.0554919	0	0.55	0.903	0.097	0	0	0	0	0	0
3542	STM3661	xylA	D-xylose isomerase	-0.84166	0.242744	-0.7634	0.360862	0.301803	-0.82628	0.341472	0	0.536	0.925	0	0	0	0	0	0	0
4169	STM4331	yjeI	putative outer membrane lipoprotein	-0.8417	0.242539	-0.72756	0.672401	0.45747	-0.81513	0.389335	0	0.547	0.886	0.114	0	0	0	0	0	0
2054	STM2115	wcaA	putative glycosyl transferase in colanic acid biosynthesis	-0.84171	0.242488	-0.76636	0.335132	0.28881	-0.82009	0.368043	0	0.506	0.904	0.15	0	0	0	0	0	0
4483	PSLT092	traU	conjugative transfer: assembly	-0.84178	0.24213	-0.67448	1.1338	0.687964	-0.78104	0.535673	0	0.569	0	0	0	0	0	0	0	0
3544	STM3663	bax	gene transcribed divergently from malS	-0.842	0.241006	-0.6927	0.975421	0.608213	-0.79385	0.480684	0	0.523	0.901	0.131	0	0	0	0	0	0
940	STM0970	pflA	pyruvate formate lyase activating enzyme 1	-0.84202	0.240903	-0.8181	-0.114618	0.0631427	-0.83778	0.292106	0	0.482	0.869	0.168	0	0	0	0	0	0
2738	STM2833	srlE	PTS family, glucitol/sorbitol-specific IIB component, one of two IIC components	-0.8421	0.240494	-0.70684	0.852509	0.546502	-0.82067	0.365554	0	0.587	0.926	0.102	0	0	0	0	0	0
4377	STM4544	dnaT	primosomal protein I	-0.84261	0.237887	-0.62169	1.59267	0.915281	-0.73766	0.721891	0	0.56	0.816	0	0	0	0	0	0	0
2346	STM2413	yfeC	putative negative regulator	-0.84269	0.237478	-0.7518	0.461694	0.349586	-0.85658	0.211403	0	0.517	0.792	0.183	1	1	0	0	0	2
1497	STM1542		putative zinc-binding dehydrogenase	-0.84277	0.237069	-0.91562	-0.96231	-0.36262	-0.94587	-0.171892	0	0.477	0.326	0.273	0	0	0	0	0	0
457	STM0466	ybaZ	putative methyltransferase	-0.8429	0.236405	-0.76855	0.316095	0.27625	-0.82124	0.363107	0	0.563	0.829	0.248	0	0	0	0	0	0
1375	STM1415	ssaN	Secretion system apparatus: homology with the YscN family of proteins	-0.84299	0.235945	-0.81168	-0.0588121	0.0885662	-0.84853	0.245959	0	0.513	0.434	0.236	1	1	1	0	0	3
1532	STM1578	narY	nitrate reductase 2, beta subunit	-0.84303	0.23574	-0.69381	0.965772	0.600756	-0.78982	0.497983	0	0.541	0.942	0.06	0	0	0	0	0	0
608	STM0621	citF	bifunctional citrate lyase alpha chain/citrate-ACP transferase	-0.84312	0.23528	-0.68285	1.06104	0.648161	-0.79612	0.470939	0	0.584	0.888	0	0	0	0	0	0	0
3827	STM3966		putative arylsulfatase regulator	-0.84324	0.234666	-0.73151	0.638065	0.436366	-0.80167	0.447115	0	0.537	0.421	0.141	0	0	0	0	0	0
2239	STM2303		putative inner membrane protein	-0.8433	0.23436	-0.768	0.320876	0.277618	-0.85602	0.213807	0	0.544	0.672	0	0	0	0	0	0	0
2326	STM2390	yfcZ	putative cytoplasmic protein	-0.84335	0.234104	-0.68784	1.01767	0.625885	-0.7877	0.507084	0	0.532	0.936	0.117	0	0	0	0	0	0
1202	STM1237	ymfC	putative ribosomal large subunit pseudouridine synthase	-0.84339	0.2339	-0.78635	0.161369	0.197634	-0.82048	0.366369	0	0.529	0.774	0.258	0	0	0	0	0	0
2165	STM2227	yejL	putative cytoplasmic protein	-0.84349	0.233388	-0.72586	0.687178	0.460283	-0.81592	0.385944	0	0.524	0.907	0	0	0	0	0	0	0
535	STM0545	fimC	periplasmic chaperone, required for type 1 fimbriae	-0.84362	0.232724	-0.85319	-0.419638	-0.0934568	-0.91468	-0.0380031	0	0.504	0.613	0.083	1	0	0	0	0	1
1215	STM1253		putative inner membrane protein	-0.84372	0.232213	-0.80497	-0.000485448	0.115864	-0.88888	0.0727486	0	0.474	0.659	0.108	0	0	0	0	0	0
1530	STM1576	narU	MFS superfamily, nitrate extrusion protein	-0.84399	0.230832	-0.79917	0.049931	0.140382	-0.84916	0.243255	0	0.527	0.851	0.173	0	1	0	0	0	1
1431	STM1476	ydgC	putative inner membrane protein	-0.844	0.230781	-0.75786	0.409018	0.3199	-0.85267	0.228187	0	0.519	0.811	0.153	0	0	0	0	0	0
3552	STM3671	yiaM	putative transporter	-0.8444	0.228736	-0.86461	-0.518906	-0.145085	-0.95215	-0.198851	0	0.467	0.764	0.178	0	0	0	0	0	0
1986	STM2047	pduL	Propanediol utilization	-0.84459	0.227765	-0.73344	0.621289	0.424527	-0.85169	0.232394	0	0.603	0	0.214	0	0	0	0	0	0
4530	PSLT072	finP	putative transglycosylase	-0.84478	0.226794	-0.86695	-0.539246	-0.156226	-0.95072	-0.192712	0	0.494	0.237	0.167	1	0	0	0	0	1
2046	STM2107	wcaH	GDP-mannose mannosyl hydrolase in colanic acid biosynthesis	-0.84494	0.225976	-0.76187	0.374161	0.300068	-0.83825	0.290088	0	0.6	0.635	0.228	0	0	0	0	0	0
880	STM0908		Fels-1 prophage	-0.84494	0.225976	-0.79808	0.0594058	0.142691	-0.89952	0.0270742	0	0.54	0.584	0.236	0	0	0	0	0	0
2741	STM2836	gutM	putative glucitol (srl) operon regulatory protein	-0.84504	0.225465	-0.74631	0.509416	0.36744	-0.86146	0.190454	0	0.552	0.832	0	0	0	0	0	0	0
1094	STM1127		putative transcriptional regulator	-0.84511	0.225107	-0.8548	-0.433632	-0.104263	-0.88052	0.108636	0	0.493	0.266	0.177	0	0	0	0	1	1
3701	STM3825	torT	periplasmic sensor in multi-comopnent regulatory system with TorS (sensory kinase) and TorR (regulator), regulates tor operon	-0.84539	0.223675	-0.6923	0.978898	0.601287	-0.76848	0.58959	0	0.546	0.642	0.087	0	0	0	0	0	0
4111	STM4271		putative inner membrane protein	-0.84541	0.223573	-0.79543	0.0824409	0.153007	-0.86868	0.159461	0	0.549	0.265	0	0	0	0	0	0	0
1617	STM1663	ynaI	putative integral membrane protein	-0.84547	0.223266	-0.82154	-0.14452	0.0393731	-0.8842	0.0928384	0	0.449	0.752	0	0	0	0	0	0	0
3501	STM3619	yhjO	glycosyltransferase, probably involved in cell wall biogenesis	-0.84549	0.223164	-0.70868	0.836515	0.529839	-0.80738	0.422604	0	0.555	0.881	0	0	0	0	0	0	0
3789	STM3923	rffH	glucose-1-phosphate thymidyl transferase	-0.84551	0.223062	-0.71842	0.75185	0.487456	-0.82124	0.363107	0	0.562	0.662	0	0	0	0	0	0	0
844	STM0872	grxA	glutaredoxin1 redox coenzyme for glutathione-dependent ribonucleotide reductase	-0.84553	0.22296	-0.89213	-0.758123	-0.267582	-0.91521	-0.0402782	0	0.433	0.759	0.345	0	0	0	0	0	0
3499	STM3617	bcsC	endo-1,4-D-glucanase	-0.84562	0.222499	-0.73291	0.625896	0.424198	-0.83143	0.319364	0	0.562	0.813	0.065	0	0	0	0	0	0
1741	STM1790		putative thiol-disulfide isomerase and thioredoxins	-0.84592	0.220966	-0.74766	0.497681	0.359324	-0.86224	0.187106	0	0.577	0.687	0.157	0	0	0	0	0	0
2173	STM2236		putative phage protein	-0.84617	0.219688	-0.60523	1.73575	0.977721	-0.69552	0.902785	0	0.552	0.07	0.087	0	1	0	0	0	1
3403	STM3519	rtcB	putative cytoplasmic protein	-0.84619	0.219585	-0.74503	0.520543	0.370064	-0.82667	0.339797	0	0.543	0.886	0.316	0	0	0	0	0	0
2006	STM2067	sbcB	exonuclease I, 3' --> 5' specific; deoxyribophosphodiesterase	-0.84624	0.21933	-0.815	-0.0876712	0.0658294	-0.89885	0.0299504	0	0.545	0.916	0	0	0	0	0	0	0
1657	STM1703	yciR	putative PAS/PAC domain; diguanylate cyclase/phosphodiesterase domain 1; Diguanylate cyclase/phosphodiesterase domain 2	-0.84638	0.218614	-0.7494	0.482556	0.350585	-0.82188	0.360359	0	0.506	0.791	0.053	0	1	0	0	0	1
3114	STM3217	aer	aerotaxis sensor receptor, senses cellular redox state or proton motive force	-0.84667	0.217132	-0.70659	0.854682	0.535907	-0.78993	0.497511	0	0.552	0.836	0.166	0	0	0	0	0	0
178	STM0178	yadI	putative PTS enzyme	-0.84705	0.215189	-0.7708	0.296537	0.255863	-0.85501	0.218142	0	0.514	0.767	0.11	0	0	0	0	0	0
2295	STM2359		putative amino acid transporter	-0.84706	0.215138	-0.85351	-0.422419	-0.103641	-0.88481	0.0902199	0	0.506	0.218	0.216	0	0	0	0	0	0
3296	STM3410	mscL	mechanosensitive channel	-0.84715	0.214678	-0.8731	-0.592705	-0.189014	-0.91939	-0.0582217	0	0.455	0.927	0.109	0	0	0	0	0	0
2099	STM2160	yehV	putative transcriptional repressor (MerR family)	-0.84733	0.213758	-0.78368	0.184578	0.199168	-0.87982	0.11164	0	0.544	0.852	0.103	0	0	0	0	0	0
3078	STM3180	ygiN	putative cytoplasmic protein	-0.84747	0.213042	-0.77314	0.276197	0.244619	-0.86548	0.173198	0	0.532	0.904	0	0	1	1	0	0	2
1201	STM1236		putative periplasmic protein	-0.8478	0.211355	-0.81039	-0.0475988	0.0818781	-0.87743	0.1219	0	0.511	0	0	0	0	0	0	0	0
1592	STM1638		putative SAM-dependent methyltransferases	-0.8478	0.211355	-0.85353	-0.422593	-0.105619	-0.92682	-0.0901165	0	0.485	0.538	0.11	0	0	0	0	0	0
2126	STM2187	yeiA	putative dihydropyrimidine dehydrogenase	-0.84786	0.211048	-0.85886	-0.468924	-0.128938	-0.93134	-0.109519	0	0.511	0.937	0.309	1	0	0	0	0	1
561	STM0574		putative transport protein, PTS system	-0.84788	0.210946	-0.78014	0.215349	0.213148	-0.8575	0.207453	0	0.57	0.377	0	0	0	0	0	0	0
3018	STM3120		putative transcriptional regulator, LysR family	-0.84807	0.209975	-0.80935	-0.0385586	0.085708	-0.8538	0.223336	0	0.496	0.296	0.311	0	0	1	1	0	2
2000	STM2061	sbmC	DNA gyrase inhibitor	-0.84815	0.209566	-0.82339	-0.160601	0.0244822	-0.90045	0.023082	0	0.51	0.71	0.09	0	0	0	0	0	0
3214	STM3321	yhbH	putative sigma N modulation factor	-0.84854	0.207572	-0.8468	-0.364092	-0.0782603	-0.88655	0.0827506	0	0.46	0.947	0	0	0	0	0	0	0
3481	STM3599		putative inner membrane protein	-0.84882	0.20614	-0.86799	-0.548286	-0.171073	-0.94843	-0.182882	0	0.507	0.419	0.096	0	0	0	0	0	0
1829	STM1877		putative amidohydrolase	-0.84899	0.205271	-0.83068	-0.223969	-0.00934906	-0.89969	0.0263445	0	0.524	0.656	0.165	0	0	1	0	0	1
225	STM0225	hlpA	histone-like protein, located in outer membrane	-0.849	0.20522	-0.84951	-0.387649	-0.0912144	-0.92337	-0.0753066	0	0.474	0.907	0.199	0	0	0	0	0	0
1921	STM1974	fliK	flagellar hook-length control protein	-0.84905	0.204965	-0.68457	1.04609	0.625528	-0.81328	0.397277	0	0.615	0.474	0.18	0	0	0	0	0	0
4255	STM4420		putative inner membrane protein	-0.84906	0.204914	-0.62939	1.52574	0.865328	-0.71628	0.813669	0	0.553	0.16	0.119	0	0	0	0	0	0
2120	STM2181	yohJ	putative effector of murein hydrolase LrgA	-0.84908	0.204811	-0.85596	-0.443716	-0.119452	-0.93738	-0.135447	0	0.465	0.917	0.129	0	0	0	0	0	0
2871	STM2967	syd	interacts with secY	-0.84916	0.204402	-0.69201	0.981419	0.59291	-0.79713	0.466604	0	0.521	0.845	0.166	0	0	0	0	0	0
3201	STM3308	yrbA	putative transcriptional regulator (BolA family)	-0.8493	0.203687	-0.78654	0.159717	0.181702	-0.83867	0.288285	0	0.498	0.856	0.227	0	0	0	0	0	0
1962	STM2023	cbiM	synthesis of vitamin B12 adenosyl cobalamide precursor	-0.84955	0.202409	-0.75598	0.42536	0.313884	-0.85701	0.209557	0	0.545	0	0	0	0	0	0	0	0
1500	STM1545		putative multidrug efflux protein	-0.84958	0.202255	-0.85288	-0.416943	-0.107344	-0.90555	0.00118927	0	0.494	0.23	0.249	0	1	0	0	0	1
1631	STM1678		putative 2'-hydroxyisoflavone reductase	-0.84993	0.200466	-0.81926	-0.124701	0.0378824	-0.89253	0.0570802	0	0.533	0.117	0.139	0	0	0	0	0	0
4231	STM4396	ytfB	putative cell envelope opacity-associated protein A	-0.84996	0.200313	-0.70105	0.902839	0.551576	-0.81041	0.409597	0	0.575	0.863	0.185	0	0	0	0	0	0
985	STM2625		Gifsy-1 prophage: similar to dnaC homologue in S. typhimurium	-0.85029	0.198626	-0.71639	0.769496	0.484061	-0.7886	0.503221	0	0.526	0.554	0.173	0	0	0	0	0	0
4232	STM4397	fklB	FKBP-type 22KD peptidyl-prolyl cis-trans isomerase (rotamase)	-0.85033	0.198421	-0.78591	0.165193	0.181807	-0.84786	0.248835	0	0.562	0.927	0.259	0	0	0	0	0	0
2572	STM2653	yfiM	putative outer membrane lipoprotein	-0.85042	0.197961	-0.70027	0.909619	0.55379	-0.81714	0.380707	0	0.56	0.673	0.168	0	0	1	0	0	1
514	STM0524	ybbY	putative transport protein	-0.85072	0.196427	-0.67274	1.14892	0.672675	-0.74054	0.709528	0	0.511	0.785	0.155	0	0	0	0	0	0
4430	STM4600	lasT	putative tRNA/tRNA methyltransferase	-0.8509	0.195507	-0.88147	-0.665461	-0.234977	-0.94546	-0.170132	0	0.526	0.825	0.158	0	0	0	0	0	0
1130	STM1164	yceB	putative outer membrane lipoprotein	-0.85096	0.1952	-0.74909	0.485251	0.340226	-0.85662	0.211231	0	0.455	0.882	0	0	0	0	0	0	0
4219	STM4384	sgaB	putative PTS enzyme IIsga subunit	-0.85113	0.194331	-0.81341	-0.0738501	0.0602406	-0.89523	0.0454899	0	0.502	0.99	0.168	0	0	0	0	0	0
4210	STM4375	yjfM	putative inner membrane protein	-0.85129	0.193513	-0.60183	1.76531	0.979411	-0.72721	0.766749	0	0.553	0.693	0.104	0	0	0	0	0	0
2698	STM2788		tricarboxylic transport	-0.85148	0.192542	-0.82172	-0.146085	0.0232286	-0.89754	0.0355738	0	0.572	0	0.063	0	0	0	0	0	0
1546	STM1592	ydcY	putative cytoplasmic protein	-0.85178	0.191008	-0.71774	0.757761	0.474385	-0.8429	0.270127	0	0.575	0.857	0.221	0	0	0	0	0	0
3392	STM3508		putative cytoplasmic protein	-0.85209	0.189424	-0.77568	0.254118	0.221771	-0.86289	0.184316	0	0.523	0.678	0.092	0	0	0	0	0	0
998	STM1028		Gifsy-2 prophage; lysozyme	-0.85246	0.187532	-0.72245	0.716819	0.452176	-0.81199	0.402814	0	0.533	0.36	0.107	0	0	0	0	0	0
1582	STM1628		putative cytoplasmic protein	-0.85255	0.187072	-0.85955	-0.474922	-0.143925	-0.93765	-0.136606	0	0.553	0.527	0.253	0	0	0	0	0	0
2898	STM2997	ppdC	prepilin peptidase dependent protein C, putative component in type IV pilin biogenesis	-0.85284	0.185589	-0.77811	0.232995	0.209292	-0.89849	0.0314957	0	0.537	0.698	0	0	0	0	0	0	0
2535	STM2606		Gifsy-1 prophage: similar to head-tail preconnector gp4 of phage 21	-0.85285	0.185538	-0.80015	0.0414124	0.113475	-0.90542	0.00174732	0	0.566	0	0	0	0	0	0	0	0
481	STM0491	gsk	inosine-guanosine kinase	-0.85288	0.185385	-0.72108	0.728728	0.457056	-0.80921	0.414748	0	0.535	0.942	0.171	0	0	0	0	0	0
614	STM0627	dcuC	DcuC family, dicarboxylate transporter	-0.85303	0.184618	-0.77989	0.217522	0.20107	-0.87069	0.150833	0	0.538	0.926	0.08	0	0	0	0	0	0
275	STM0282		putative outer membrane protein, OmpA family	-0.85349	0.182266	-0.66267	1.23646	0.709361	-0.75307	0.65574	0	0.594	0	0	0	0	0	0	0	0
431	STM0440	cyoD	cytochrome o ubiquinol oxidase subunit IV	-0.85366	0.181397	-0.83557	-0.266476	-0.0425392	-0.89884	0.0299933	0	0.517	0.936	0.092	0	0	0	0	0	0
2609	STM2697		Fels-2 prophage:similar to orfG protein in phage 186	-0.85368	0.181295	-0.73482	0.609293	0.395294	-0.84609	0.256433	0	0.579	0	0	0	0	0	0	0	0
4321	STM4488		putative integrase	-0.85374	0.180988	-0.88203	-0.670329	-0.24467	-0.96591	-0.257918	0	0.498	0.368	0.189	0	0	0	0	0	0
3482	STM3600		putative sugar kinases, ribokinase family	-0.8538	0.180682	-0.90922	-0.906678	-0.362998	-0.95801	-0.224006	0	0.477	0.288	0.253	1	0	0	0	1	2
1612	STM1658	ydaL	putative Smr domain	-0.85401	0.179608	-0.8206	-0.136349	0.0216295	-0.89628	0.0409826	0	0.526	0.861	0.139	0	0	0	0	0	0
2137	STM2198		putative regulatory protein	-0.85412	0.179046	-0.80933	-0.0383847	0.0703305	-0.85292	0.227114	0	0.511	0.386	0.293	0	0	0	0	0	0
4090	STM4250	yjbQ	putative cytoplasmic protein	-0.85419	0.178688	-0.85274	-0.415726	-0.118519	-0.92284	-0.0730315	0	0.517	0.79	0.159	0	0	0	0	0	0
3848	STM3987	hemG	protoporphyrin oxidase	-0.85432	0.178023	-0.83124	-0.228837	-0.025407	-0.90608	-0.00108587	0	0.505	0.878	0.105	0	0	0	0	0	0
3097	STM3199	yqiK	paral putative membrane protein	-0.8546	0.176592	-0.72786	0.669793	0.423192	-0.8347	0.305327	0	0.537	0.914	0.163	0	0	0	0	0	0
3484	STM3602		putative regulatory protein, gntR family	-0.8547	0.176081	-0.8463	-0.359746	-0.0918327	-0.89933	0.0278899	0	0.494	0.276	0.126	1	0	0	0	1	2
916	STM0944	yljA	putative cytoplasmic protein	-0.85482	0.175467	-0.81706	-0.105578	0.0349448	-0.87519	0.131516	0	0.466	0.972	0.132	0	0	0	0	0	0
4247	STM4412		putative pemease	-0.85486	0.175263	-0.90595	-0.878253	-0.351495	-0.92613	-0.0871545	0	0.475	0.251	0.231	0	1	0	0	0	1
296	STM0303	ybeJ	putative xylanase/chitin deacetylase	-0.85527	0.173167	-0.80798	-0.0266499	0.0732585	-0.88208	0.101939	0	0.516	0.256	0.11	1	0	0	0	0	1
1099	STM1132		putative sugar transort protein	-0.85538	0.172604	-0.82835	-0.203716	-0.0155558	-0.87519	0.131516	0	0.453	0.545	0.204	0	0	0	0	0	0
62	STM0062	citX2	putative cytoplasmic protein	-0.85562	0.171378	-0.8065	-0.013785	0.0787963	-0.91029	-0.0191581	0	0.561	0.388	0.148	0	0	0	0	0	0
4491	PSLT100	traH	conjugative transfer: assembly	-0.85579	0.170508	-0.67133	1.16118	0.665844	-0.78086	0.536446	0	0.54	0	0.102	0	0	0	0	0	0
1116	STM1150	mdoG	periplasmic glucans biosynthesis protein	-0.85598	0.169537	-0.7711	0.293929	0.231733	-0.87653	0.125763	0	0.511	0.937	0	0	0	0	0	0	0
4422	STM4592	sthD	putative fimbrial subunit	-0.85601	0.169384	-0.82029	-0.133654	0.0178646	-0.90323	0.0111483	0	0.506	0.259	0	0	0	0	0	0	0
1277	STM1316	celF	phospho-beta-glucosidase (cellobiose-6-phosphate hydrolase)	-0.85615	0.168668	-0.89624	-0.793849	-0.312591	-0.9547	-0.209797	0	0.481	0.902	0.151	0	0	0	0	0	0
4179	STM4341	frdC	fumarate reductase, anaerobic, membrane anchor polypeptide	-0.85629	0.167952	-0.77896	0.225606	0.196779	-0.88234	0.100823	0	0.522	0.893	0	0	0	0	0	0	0
1534	STM1580	narV	nitrate reductase 2, gamma subunit	-0.85649	0.16693	-0.77757	0.237689	0.202309	-0.87564	0.129584	0	0.537	0.965	0.04	0	0	0	0	0	0
1053	STM1084	yccK	putative sulfite reductase, gamma subunit	-0.85661	0.166316	-0.81886	-0.121224	0.0225461	-0.89444	0.0488812	0	0.505	0.908	0.11	0	0	0	0	0	0
4260	STM4425		putative dehydrogenase	-0.85666	0.166061	-0.81546	-0.0916697	0.0371956	-0.87088	0.150017	0	0.491	0.152	0.164	0	0	0	0	0	0
892	STM0920		Fels-1 prophage; ail and ompX homologue	-0.85668	0.165959	-0.80371	0.0104671	0.0882128	-0.88859	0.0739935	0	0.458	0.372	0.163	0	0	0	0	0	0
2924	STM3023	yohL	putative cytoplasmic protein	-0.85684	0.165141	-0.87762	-0.631995	-0.233427	-0.95974	-0.231432	0	0.46	0.933	0.156	0	0	0	0	0	0
1826	STM1874		putative inner membrane protein	-0.85705	0.164067	-0.79615	0.0761823	0.120125	-0.87679	0.124647	0	0.528	0.646	0.082	0	0	0	0	0	0
3432	STM3550		putative phosphotriesterase	-0.85746	0.161971	-0.84602	-0.357312	-0.0976706	-0.93665	-0.132314	0	0.513	0.265	0.311	0	0	0	0	0	0
4049	STM4209		putative inner membrane protein	-0.85792	0.159619	-0.73344	0.621289	0.390454	-0.8489	0.244371	0	0.593	0	0.188	0	0	0	0	0	0
1907	STM1960	fliD	flagellar biosynthesis; filament capping protein; enables filament assembly	-0.858	0.15921	-0.75009	0.476559	0.317885	-0.81255	0.40041	0	0.494	0.512	0.165	0	0	0	0	0	0
282	STM0289		putative cytoplasmic protein	-0.85804	0.159006	-0.66182	1.24385	0.701426	-0.75933	0.628868	0	0.569	0	0	0	0	0	0	0	0
2250	STM2314		putative chemotaxis signal transduction protein	-0.85804	0.159006	-0.8172	-0.106795	0.0261057	-0.9083	-0.0106157	0	0.521	0.111	0.075	0	0	0	0	0	0
1567	STM1613		putative PTS system, enzymeIIB component	-0.85805	0.158955	-0.81076	-0.050815	0.0540699	-0.90183	0.0171581	0	0.502	0.344	0	0	0	0	0	0	0
1028	STM1059	ycbW	putative cytoplasmic protein	-0.85825	0.157932	-0.70241	0.891017	0.524475	-0.8258	0.343532	0	0.518	0.9	0.211	0	0	0	0	0	0
3247	STM3355		putative tartrate dehydratase alpha subunit	-0.85829	0.157728	-0.76562	0.341564	0.249646	-0.84906	0.243684	0	0.519	0.532	0.06	0	0	0	0	0	0
43	STM0043	rpsT	30S ribosomal subunit protein S20	-0.85833	0.157523	-0.84134	-0.316631	-0.079554	-0.8759	0.128468	0	0.468	0.977	0.218	1	0	0	0	0	1
1100	STM1133		putative dehydrogenases and related proteins	-0.85843	0.157012	-0.7798	0.218305	0.187658	-0.85405	0.222263	0	0.466	0.622	0.185	0	0	0	0	0	0
6	STM0006	yaaJ	putative AGCS family, alanine/glycine transport protein	-0.85863	0.15599	-0.8434	-0.334538	-0.0892741	-0.93048	-0.105828	0	0.559	0.763	0.103	0	0	0	0	0	0
4414	STM4584	yjjX	putative cytoplasmic protein	-0.85866	0.155836	-0.70453	0.872589	0.514213	-0.79295	0.484547	0	0.565	0.883	0.205	0	0	0	0	0	0
4026	STM4186		putative cytoplasmic protein	-0.85896	0.154303	-0.64529	1.38753	0.770917	-0.75896	0.630456	0	0.59	0	0.215	0	0	0	0	0	0
4531	PSLT106		homologue of mvpA, Shigella flexneri	-0.85901	0.154047	-0.79164	0.115385	0.134716	-0.88929	0.0709886	0	0.538	0	0.311	0	0	0	0	0	0
2296	STM2360		putative diaminopimelate decarboxylase	-0.85921	0.153025	-0.84861	-0.379826	-0.113401	-0.89785	0.0342431	0	0.498	0.252	0.2	0	1	0	0	0	1
1321	STM1360	ydiN	putative MFS family transport protein	-0.85928	0.152667	-0.84686	-0.364614	-0.105974	-0.92813	-0.0957399	0	0.465	0.854	0.19	0	0	0	0	0	0
1576	STM1622	ydcG	paral putative periplasmic glucans biosynthesis protein	-0.85958	0.151133	-0.67624	1.1185	0.634816	-0.78273	0.528419	0	0.547	0.891	0	0	0	0	0	0	0
35	STM0035		putative arylsulfatase	-0.85961	0.15098	-0.86027	-0.48118	-0.1651	-0.91091	-0.0218196	0	0.524	0.274	0.29	1	0	0	0	0	1
1493	STM1538		putative hydrogenase-1 large subunit	-0.85988	0.1496	-0.80888	-0.0344731	0.0575632	-0.90489	0.00402245	0	0.527	0.663	0.063	0	0	0	0	0	0
1517	STM1563	osmC	putative resistance protein, osmotically inducible	-0.86021	0.147913	-0.79885	0.0527126	0.100313	-0.88048	0.108807	0	0.517	0.923	0.049	0	1	0	0	0	1
1018	STM1048		Gifsy-2 prophage; host specificity protein J, phage lambda	-0.86027	0.147606	-0.7352	0.60599	0.376798	-0.84427	0.264246	0	0.566	0	0.261	0	0	0	0	0	0
646	STM0659	hscC	putative heatshock protein, homolog of hsp70 in Hsc66 subfamily	-0.86034	0.147248	-0.88653	-0.709445	-0.281099	-0.94871	-0.184084	0	0.526	0.826	0.331	0	0	0	0	1	1
1536	STM1582	nhoA	putative arylamine N-acetyltransferase	-0.86043	0.146788	-0.7991	0.0505395	0.0986637	-0.89247	0.0573378	0	0.523	0.744	0.224	1	0	0	0	0	1
1618	STM1664		putative transcriptional regulator	-0.86055	0.146174	-0.82677	-0.189982	-0.0219037	-0.90749	-0.00713857	0	0.518	0.245	0.165	0	0	0	0	0	0
3135	STM3238	yhaN	putative inner membrane protein	-0.86062	0.145817	-0.66434	1.22194	0.683878	-0.77043	0.581219	0	0.562	0.837	0	0	0	0	0	0	0
1566	STM1612		putative cellulase protein	-0.86065	0.145663	-0.78708	0.155023	0.150343	-0.90105	0.0205064	0	0.556	0.847	0.14	0	0	0	0	0	0
2844	STM2939	ygcH	putative cytoplasmic protein	-0.86068	0.14551	-0.65556	1.29826	0.721885	-0.77284	0.570873	0	0.572	0.282	0.106	0	0	0	0	0	0
2237	STM2301	pqaB	putative melittin resistance protein, PqaB	-0.86091	0.144334	-0.78475	0.175277	0.159805	-0.89142	0.0618451	0	0.541	0.715	0.075	0	0	0	0	0	0
2982	STM3083		putative Mannitol dehydrogenase	-0.86097	0.144027	-0.83838	-0.290902	-0.0734372	-0.91139	-0.0238801	0	0.515	0.482	0.051	0	0	0	0	0	0
807	STM0835		putative Mn-dependent transcriptional regulator.	-0.861	0.143874	-0.6913	0.98759	0.565732	-0.81275	0.399552	0	0.531	0.898	0.14	0	0	0	0	0	0
2614	STM2702		Fels-2 prophage: similar to te-specific recombinases, DNA invertase Pin homolog	-0.861	0.143874	-0.78659	0.159283	0.151578	-0.86799	0.162423	0	0.504	0.859	0.13	0	0	0	0	0	0
102	STM0102	araA	L-arabinose isomerase	-0.86134	0.142136	-0.75209	0.459174	0.300655	-0.86345	0.181912	0	0.559	0.956	0	0	0	0	0	0	0
4510	PSLT018	pefA	plasmid-encoded fimbriae; major fimbrial subunit	-0.86134	0.142136	-0.76142	0.378073	0.260104	-0.86738	0.165042	0	0.533	0	0	0	0	0	0	0	0
1131	STM1165	grxB	glutaredoxin 2	-0.86142	0.141727	-0.81584	-0.0949729	0.023377	-0.92425	-0.0790842	0	0.465	0.86	0.2	0	0	0	0	0	0
157	STM0157	yacH	putative outer membrane protein	-0.86167	0.140449	-0.7437	0.532104	0.336276	-0.86418	0.178778	0	0.574	0.589	0.085	0	0	0	0	0	0
3834	STM3973	tatA	component of Sec-independent protein secretion pathway	-0.86192	0.139171	-0.85218	-0.410858	-0.135844	-0.92135	-0.0666354	0	0.457	0.893	0.214	0	0	0	0	0	0
1486	STM1531		putative hydrogenase	-0.86199	0.138813	-0.80465	0.00229615	0.0705545	-0.90875	-0.0125474	0	0.504	0.381	0.212	0	0	0	0	0	0
2465	STM2537	yfhJ	believed to be involved in assembly of Fe-S clusters	-0.86206	0.138455	-0.76745	0.325657	0.232056	-0.86741	0.164913	0	0.495	0.924	0	0	0	0	0	0	0
27	STM0027	bcfG	fimbrial chaparone	-0.86213	0.138097	-0.7245	0.699	0.418548	-0.81731	0.379977	0	0.54	0.399	0.095	0	0	0	0	0	0
2386	STM2457	eutC	ethanolamine ammonia-lyase, light chain	-0.86214	0.138046	-0.61687	1.63457	0.886309	-0.75402	0.651662	0	0.608	0.909	0.057	0	0	0	0	0	0
2385	STM2456	eutL	putative carboxysome structural protein, ethanolamine utilization	-0.86233	0.137075	-0.65499	1.30321	0.720145	-0.78337	0.525671	0	0.595	0.941	0	0	0	0	0	0	0
148	STM0148		putative cytoplasmic protein	-0.8632	0.132627	-0.76392	0.356341	0.244484	-0.86778	0.163325	0	0.535	0.237	0.051	0	0	0	0	0	0
3376	STM3492	yrfD	putative periplasmic protein	-0.8634	0.131605	-0.73272	0.627547	0.379576	-0.86956	0.155684	0	0.583	0.653	0	0	0	0	0	0	0
3885	STM4029	yiiD	putative acetyltransferase	-0.8635	0.131093	-0.72793	0.669184	0.400139	-0.84026	0.28146	0	0.544	0.933	0	0	0	0	0	0	0
234	STM0234	ldcC	lysine decarboxylase 2, constitutive	-0.86368	0.130173	-0.70381	0.878847	0.50451	-0.78601	0.514339	0	0.519	0.91	0.081	0	0	0	0	0	0
3715	STM3839	rpmH	50S ribosomal subunit protein L34	-0.86373	0.129918	-0.87599	-0.617826	-0.243954	-0.93794	-0.137851	0	0.529	1	0.391	0	0	0	0	0	0
1514	STM1560		putative alpha amylase	-0.86378	0.129662	-0.74592	0.512806	0.321234	-0.81756	0.378904	0	0.544	0.2	0.13	0	0	0	0	0	0
564	STM0577		putative transport protein, PTS system	-0.86399	0.128588	-0.73665	0.593386	0.360987	-0.82974	0.326619	0	0.523	0.235	0.128	0	0	0	0	0	0
4392	STM4562		putative inner membrane protein	-0.86407	0.128179	-0.80375	0.0101194	0.0691494	-0.92175	-0.0683525	0	0.542	0	0	0	0	0	0	0	0
3539	STM3658	yiaH	putative inner membrane protein	-0.86442	0.12639	-0.72423	0.701347	0.413868	-0.8309	0.321639	0	0.479	0.816	0.115	0	0	0	0	0	0
600	STM0613		putative hydrogenase protein	-0.86443	0.126339	-0.78466	0.176059	0.151199	-0.90035	0.0235113	0	0.551	0.2	0	0	0	1	0	0	1
2712	STM2802	ygaM	putative inner membrane protein	-0.86443	0.126339	-0.81761	-0.110359	0.00799025	-0.93104	-0.108232	0	0.547	0.866	0.161	0	0	0	0	0	0
4196	STM4361	hfq	host factor I for bacteriophage Q beta replication, a growth-related protein	-0.86455	0.125726	-0.8862	-0.706577	-0.290426	-0.96058	-0.235038	0	0.5	0.941	0	0	0	0	0	0	0
3328	STM3442	hopD	leader peptidase HopD	-0.86465	0.125214	-0.88871	-0.728395	-0.30159	-0.96578	-0.25736	0	0.531	0.406	0.123	0	0	0	0	0	0
63	STM0063	citG2	putative modifier of citrate lyase protein	-0.86501	0.123374	-0.79911	0.0504526	0.0869133	-0.90627	-0.00190148	0	0.548	0.44	0.103	0	0	0	0	0	0
1569	STM1615		putative nucleoside triphosphatase	-0.86507	0.123067	-0.76984	0.304882	0.213975	-0.89144	0.0617593	0	0.536	0.929	0.127	0	0	0	0	0	0
4381	STM4548	bglJ	transcriptional regulator (activator) of bgl operon (LuxR/UhpA family)	-0.86508	0.123016	-0.77588	0.252379	0.187698	-0.85907	0.200714	0	0.49	0.621	0	0	0	0	0	0	0
557	STM0570	apeE	outer membrane N-acetyl phenylalanine beta-naphthyl ester-cleaving esterase	-0.86534	0.121687	-0.7406	0.55905	0.340369	-0.85228	0.229861	0	0.557	0.076	0.043	0	0	0	0	0	0
4137	STM4297	melR	regulator of melibiose operon (AraC/XylS family)	-0.86554	0.120665	-0.8077	-0.024216	0.0482243	-0.90135	0.0192186	0	0.524	0.852	0.087	0	0	1	0	0	1
1959	STM2020	cbiO	synthesis of vitamin B12 adenosyl cobalamide precursor	-0.86582	0.119233	-0.8316	-0.231967	-0.0563667	-0.87854	0.117135	0	0.524	0.262	0.284	0	0	0	0	0	0
3024	STM3126		putative amino acid transporter	-0.86619	0.117342	-0.80659	-0.0145673	0.0513872	-0.88448	0.0916365	0	0.516	0.184	0.196	0	0	0	0	0	0
4283	STM4448		putative phosphotransferase system mannitol/fructose-specific IIA domain (Ntr-type)	-0.86629	0.11683	-0.77298	0.277587	0.197209	-0.86417	0.178821	0	0.542	0.119	0	0	0	0	0	0	0
1082	STM1114	scsB	Suppression of copper sensitivity: lipoprotein modification in lgt mutants of E. coli	-0.86637	0.116421	-0.74791	0.495508	0.305965	-0.8537	0.223766	0	0.581	0.167	0.057	0	0	0	0	0	0
2629	STM2717		Fels-2 prophage: similar to gpX in phage P2	-0.86652	0.115655	-0.7232	0.7103	0.412977	-0.84313	0.26914	0	0.611	0	0	0	0	0	0	0	0
2487	STM2559	cadA	lysine decarboxylase 1	-0.86708	0.112792	-0.7788	0.226997	0.169894	-0.86449	0.177448	0	0.497	0.924	0.105	0	0	0	0	0	0
1502	STM1547		putative marR-family transcriptional regulator	-0.86709	0.112741	-0.82573	-0.180942	-0.0341005	-0.92315	-0.0743623	0	0.488	0.179	0	0	0	0	0	0	0
3142	STM3245	tdcA	transcriptional activator of tdc operon (LysR family)	-0.86712	0.112587	-0.82316	-0.158602	-0.0230073	-0.89178	0.0602997	0	0.448	0.888	0	1	0	0	0	0	1
910	STM0938	ybjE	putative inner membrane protein	-0.86725	0.111923	-0.82594	-0.182767	-0.0354222	-0.92015	-0.0614842	0	0.511	0.89	0	0	0	0	0	0	0
3878	STM4022	yihT	putative aldolase	-0.86736	0.11136	-0.67821	1.10138	0.606368	-0.803	0.441406	0	0.541	0.873	0	0	0	0	0	0	0
2218	STM2282	glpQ	glycerophosphodiester phosphodiesterase, periplasmic	-0.86742	0.111054	-0.86688	-0.538638	-0.213792	-0.93609	-0.12991	0	0.486	0.893	0.16	0	0	0	0	0	0
3391	STM3507	yhgG	putative cytoplasmic protein	-0.86746	0.110849	-0.68256	1.06356	0.587206	-0.81261	0.400153	0	0.568	0.897	0.295	0	0	0	0	0	0
4319	STM4485	idnK	D-gluconate kinase, thermosensitive	-0.86794	0.108395	-0.85728	-0.45519	-0.173397	-0.90614	-0.00134343	0	0.458	0.841	0.392	1	0	0	0	0	1
3859	STM4003	yihI	putative cytoplasmic protein	-0.86879	0.10405	-0.7389	0.573828	0.338939	-0.85574	0.215009	0	0.524	0.825	0.199	0	0	0	0	0	0
3020	STM3122		putative arylsulfatase	-0.86888	0.10359	-0.82936	-0.212495	-0.0544528	-0.90724	-0.0060654	0	0.486	0.152	0.237	0	0	0	0	0	0
1498	STM1543		putative transport protein	-0.86897	0.10313	-0.91497	-0.95666	-0.426765	-0.9627	-0.244139	0	0.467	0.311	0.241	1	0	0	0	0	1
4022	STM4182	metA	homoserine transsuccinylase	-0.86899	0.103027	-0.82541	-0.17816	-0.0375663	-0.88147	0.104557	0	0.492	0.951	0	1	0	0	0	0	1
1396	STM1438	ydhL	putative oxidoreductase	-0.86927	0.101596	-0.81618	-0.0979283	0.00183388	-0.91853	-0.05453	0	0.506	0.823	0.203	0	0	0	0	0	0
1737	STM1786		hydrogenase-1 small subunit	-0.86936	0.101136	-0.70077	0.905272	0.503204	-0.82522	0.346022	0	0.57	0.922	0	0	1	0	0	0	1
1072	STM1104	hpaF	4-hydroxyphenylacetate catabolism	-0.86961	0.0998579	-0.80331	0.0139441	0.056901	-0.90271	0.0133805	0	0.537	0	0.127	0	0	0	0	0	0
4246	STM4411	ytfP	putative cytoplasmic protein	-0.86962	0.0998068	-0.79022	0.127729	0.113768	-0.87249	0.143106	0	0.497	0.921	0.246	0	0	0	0	0	0
3959	STM4102		putative inner membrane protein	-0.86974	0.0991933	-0.88407	-0.688062	-0.294434	-0.93498	-0.125145	0	0.47	0.537	0.06	0	0	0	0	0	0
4253	STM4418		sugar (and other) transporter	-0.86982	0.0987844	-0.7621	0.372162	0.235473	-0.81926	0.371606	0	0.468	0.426	0.281	0	0	0	0	0	0
1022	STM1053		Gifsy-2 prophage	-0.8699	0.0983754	-0.75029	0.47482	0.286598	-0.836	0.299747	0	0.524	0.731	0.288	0	0	0	0	0	0
1577	STM1623		putative carboxylesterase	-0.86992	0.0982731	-0.75935	0.396066	0.24717	-0.86236	0.186591	0	0.572	0	0.361	0	0	0	0	0	0
4318	STM4484	idnD	L-idonate 5-dehydrogenase	-0.86998	0.0979664	-0.88599	-0.704751	-0.303392	-0.94245	-0.157211	0	0.502	0.828	0.297	0	0	0	0	0	0
1302	STM1341	btuE	ABC superfamily (binding protein), vitamin B12 transport protein	-0.87014	0.0971485	-0.84079	-0.311851	-0.107351	-0.91505	-0.0395914	0	0.495	0.858	0.383	0	0	0	0	0	0
4480	PSLT088	traC	conjugative transfer: assembly	-0.87024	0.0966372	-0.73879	0.574784	0.335711	-0.85506	0.217928	0	0.57	0.066	0.058	0	0	0	0	0	0
1173	STM1208	ycfN	putative cytoplasmic protein	-0.87032	0.0962283	-0.71855	0.75072	0.423474	-0.82458	0.348769	0	0.567	0.664	0.182	0	0	0	0	0	0
2377	STM2448	yfeZ	putative inner membrane protein	-0.87041	0.0957682	-0.73662	0.593647	0.344707	-0.87903	0.115032	0	0.561	0.738	0	0	0	0	0	0	0
3578	STM3697		putative mandelate racemase / muconate lactonizing enzyme family	-0.87045	0.0955637	-0.82544	-0.178421	-0.0414286	-0.89262	0.0566939	0	0.546	0.229	0.224	0	0	0	0	0	0
1941	STM1996	cspB	putative cold-shock protein	-0.87048	0.0954103	-0.92471	-1.04132	-0.472957	-0.9597	-0.23126	0	0.42	0.843	0.457	0	0	0	0	0	0
1988	STM2049	pduN	Propanediol utilization: polyhedral bodies	-0.87059	0.094848	-0.71813	0.754371	0.424609	-0.85136	0.233811	0	0.615	0.418	0	0	0	0	0	0	0
2793	STM2888	spaR	surface presentation of antigens; secretory proteins	-0.8706	0.0947968	-0.87478	-0.607308	-0.256256	-0.95161	-0.196532	0	0.494	0.198	0.095	1	1	0	0	1	3
675	STM0695	ybfE	LexA regulated, putative SOS response	-0.8709	0.0932632	-0.65828	1.27462	0.68394	-0.79794	0.463127	0	0.529	0.907	0.165	0	0	0	0	0	0
4293	STM4459	pyrI	aspartate carbamoyltransferase, regulatory subunit (allosteric regulation)	-0.87093	0.0931098	-0.83084	-0.22536	-0.0661252	-0.93375	-0.119865	0	0.49	0.941	0.131	0	0	0	0	0	0
1945	STM2001	yeeI	putative inner membrane protein	-0.871	0.092752	-0.75612	0.424143	0.258447	-0.86224	0.187106	0	0.512	0.804	0.094	0	0	0	0	0	0
3498	STM3616	yhjL	putative TPR-repeat-containing protein	-0.87108	0.092343	-0.7141	0.789401	0.440872	-0.86046	0.194747	0	0.602	0.783	0.106	0	1	0	0	0	1
957	STM0987	ycaR	putative inner membrane protein	-0.87113	0.0920874	-0.89651	-0.796196	-0.352054	-0.9729	-0.287924	0	0.467	0.933	0.317	0	0	0	0	0	0
1879	STM1927	yecG	putative universal stress protein	-0.87117	0.0918829	-0.92842	-1.07357	-0.490845	-0.98347	-0.333298	0	0.521	0.768	0.155	0	0	0	0	0	0
594	STM0607	dsbG	periplasmic disulfide isomerase, thiol-disulphide oxidase	-0.87149	0.090247	-0.69774	0.931611	0.510929	-0.79755	0.464801	0	0.508	0.77	0	0	0	0	0	0	0
4064	STM4224	yjbG	putative periplasmic protein	-0.87159	0.0897358	-0.62796	1.53817	0.813954	-0.77384	0.566581	0	0.597	0.743	0.11	0	0	0	0	0	0
4359	STM4526	hsdR	endonuclease R, host restriction	-0.87197	0.0877931	-0.63557	1.47202	0.779908	-0.76097	0.621828	0	0.557	0.91	0	0	0	0	0	0	0
1714	STM1763	narH	nitrate reductase 1, FeS (beta) subunit	-0.87197	0.0877931	-0.69687	0.939173	0.513483	-0.8157	0.386888	0	0.558	0.93	0	0	0	0	0	0	0
4104	STM4264	yjcC	putative diguanylate cyclase/phosphodiesterase	-0.87213	0.0869752	-0.91459	-0.953357	-0.433191	-0.9984	-0.397388	0	0.475	0.644	0.053	1	0	0	0	0	1
3156	STM3260		PTS family galactitol-specific enzyme IIC	-0.87245	0.0853393	-0.73421	0.614595	0.349967	-0.85289	0.227243	0	0.554	0.838	0	0	0	0	0	0	0
2383	STM2454	eutR	putative regulator ethanolamine operon (AraC/XylS family)	-0.87264	0.084368	-0.72844	0.664751	0.37456	-0.84254	0.271672	0	0.544	0.917	0.083	0	0	0	0	0	0
1886	STM1935	ftn	cytoplasmic ferritin	-0.87265	0.0843168	-0.87968	-0.649902	-0.282792	-0.9506	-0.192197	0	0.461	0.921	0.23	0	1	0	0	0	1
727	STM0747	tolA	tol protein, membrane spanning protein	-0.87286	0.0832433	-0.73739	0.586953	0.335098	-0.86846	0.160406	0	0.588	0.256	0.155	0	0	0	0	0	0
1017	STM1047		Gifsy-2 prophage; probable tail assembly protein	-0.87289	0.0830899	-0.78314	0.189272	0.136181	-0.90707	-0.00533564	0	0.57	0	0.252	0	0	0	0	0	0
1315	STM1354	ydiQ	putative electron transfer flavoprotein	-0.87296	0.0827321	-0.78593	0.16502	0.123876	-0.88008	0.110524	0	0.541	0.795	0.264	0	1	0	0	0	1
2442	STM2514	ratB	putative outer membrane protein	-0.873	0.0825276	-0.63491	1.47776	0.780144	-0.76709	0.595556	0	0.587	0	0.053	1	0	0	0	0	1
1664	STM1710	pgpB	phosphatidylglycerophosphate phosphatase B	-0.8732	0.0815051	-0.76818	0.319311	0.200408	-0.88437	0.0921086	0	0.565	0.827	0.138	0	0	0	0	0	0
4021	STM4181	yjaB	putative acetyltransferase	-0.87336	0.0806872	-0.83247	-0.239529	-0.0794209	-0.89102	0.0635622	0	0.487	0.807	0.269	0	0	0	0	0	0
1742	STM1791		putative hydrogenase-1 protein	-0.87337	0.0806361	-0.67438	1.13467	0.607652	-0.80356	0.439002	0	0.596	0.745	0.099	0	0	0	0	0	0
75	STM0075	fixA	putative flavoprotein reductase, carnitine metabolism	-0.87354	0.079767	-0.78963	0.132857	0.106312	-0.87762	0.121084	0	0.521	0.879	0.227	0	0	0	0	0	0
254	STM0261	gloB	hydroxyacylglutathione hydrolase	-0.87368	0.0790513	-0.83077	-0.224752	-0.0728503	-0.87931	0.11383	0	0.442	0.785	0.367	0	0	0	0	0	0
2501	STM2573		putative ketopantoate reductase	-0.87372	0.0788468	-0.88793	-0.721615	-0.321384	-0.95234	-0.199666	0	0.49	0.259	0.102	0	0	0	0	0	0
2362	STM2433	crr	PTS family, glucose-specific IIA component	-0.87388	0.0780288	-0.78745	0.151807	0.114918	-0.87329	0.139672	0	0.475	0.982	0.124	0	0	0	0	0	0
4346	STM4513	yjiG	putative permease	-0.87389	0.0779777	-0.7551	0.433009	0.255493	-0.88079	0.107477	0	0.56	0.961	0.137	0	0	0	0	0	0
1208	STM1243		homology with cold shock proteins	-0.87398	0.0775176	-0.92494	-1.04332	-0.482903	-0.97764	-0.308271	0	0.476	0.814	0.357	0	0	0	0	0	0
1067	STM1099	hpaB	4-hydroxyphenylacetate catabolism	-0.87411	0.076853	-0.72596	0.686308	0.381581	-0.82491	0.347353	0	0.526	0	0	0	0	0	0	0	0
566	STM0579	ybdF	putative cytoplasmic protein	-0.87491	0.0727633	-0.74487	0.521933	0.297348	-0.8684	0.160663	0	0.511	0.746	0.148	0	0	0	0	0	0
322	STM0332		putative hydrolase or acyltransferase	-0.87497	0.0724566	-0.84414	-0.34097	-0.134257	-0.89076	0.0646783	0	0.515	0.181	0.257	0	0	0	0	0	0
1246	STM1285	yeaG	putative Ser protein kinase	-0.875	0.0723032	-0.77369	0.271416	0.171859	-0.86993	0.154095	0	0.507	0.986	0	0	0	0	0	0	0
3141	STM3244	tdcB	threonine dehydratase, catabolic	-0.87534	0.070565	-0.952	-1.27854	-0.603989	-0.98782	-0.351971	0	0.466	0.951	0.365	0	0	0	0	0	0
893	STM0921		Fels-1 prophage; putative minor tail protein	-0.87584	0.0680089	-0.70003	0.911705	0.489857	-0.8277	0.335376	0	0.581	0	0.078	0	0	0	0	0	0
1081	STM1113	scsA	Suppression of copper sensitivity: putative copper binding protein	-0.87593	0.0675488	-0.73306	0.624592	0.34607	-0.87946	0.113186	0	0.597	0	0.292	0	0	0	0	0	0
1689	STM1735	yciB	putative intracellular septation protein	-0.87617	0.0663219	-0.87145	-0.578362	-0.25602	-0.94888	-0.184813	0	0.471	0.933	0.101	0	0	0	0	0	0
2971	STM3072		putative inner membrane protein	-0.87618	0.0662708	-0.73747	0.586258	0.326264	-0.86842	0.160577	0	0.567	0.229	0.161	0	0	0	0	0	0
3983	STM4128	yijD	putative inner membrane protein	-0.87634	0.0654528	-0.7491	0.485164	0.275309	-0.88031	0.109537	0	0.515	0.908	0	0	0	0	0	0	0
2317	STM2381	yfcM	putative cytoplasmic protein	-0.87659	0.0641748	-0.74624	0.510025	0.2871	-0.87784	0.12014	0	0.535	0.923	0.104	0	0	0	0	0	0
1993	STM2054	pduT	Propanediol utilization: polyhedral bodies	-0.87665	0.0638681	-0.7458	0.513849	0.288859	-0.87088	0.150017	0	0.585	0.174	0.087	0	0	0	0	0	0
345	STM0355		putative Copper chaperone	-0.87666	0.0638169	-0.87818	-0.636863	-0.286523	-0.97037	-0.277064	0	0.582	0.312	0.281	0	0	0	0	0	0
5	STM0005	yaaA	putative cytoplasmic protein	-0.87673	0.0634591	-0.76975	0.305664	0.184562	-0.849	0.243941	0	0.507	0.864	0	0	0	0	0	0	0
1525	STM1571	yddG	putative permease	-0.87678	0.0632035	-0.86061	-0.484136	-0.210466	-0.94411	-0.164337	0	0.508	0.854	0.146	1	1	0	0	0	2
3579	STM3698		putative permease	-0.8768	0.0631012	-0.85138	-0.403904	-0.170401	-0.90591	-0.000356106	0	0.479	0.489	0.252	0	0	0	0	0	0
962	STM0992	mukF	mukF protein (killing factor KICB)	-0.87702	0.0619766	-0.71088	0.817391	0.439684	-0.85081	0.236172	0	0.539	0.982	0.107	0	0	0	0	0	0
2873	STM2969	ygdH	putative nucleotide binding	-0.87718	0.0611586	-0.72282	0.713603	0.387381	-0.84188	0.274505	0	0.554	0.943	0.108	0	0	0	0	0	0
3118	STM3221	ygjP	putative metal-dependent hydrolase	-0.8772	0.0610564	-0.77292	0.278109	0.169583	-0.88564	0.0866569	0	0.535	0.867	0.158	0	0	0	0	0	0
2036	STM2097	rfbB	dTDP-glucose 4,6 dehydratase	-0.87758	0.0591137	-0.90772	-0.893639	-0.417263	-0.93574	-0.128407	0	0.441	0.884	0.346	1	0	1	0	0	2
2750	STM2845	hycI	protease involved in processing C-terminal end of HycE	-0.87762	0.0589092	-0.77008	0.302796	0.180852	-0.89313	0.0545046	0	0.564	0.917	0	0	0	0	0	0	0
1594	STM1640	ydcF	putative inner membrane protein	-0.87774	0.0582958	-0.79039	0.126251	0.0922734	-0.90773	-0.00816882	0	0.547	0.688	0	0	0	0	0	0	0
1712	STM1761	narI	nitrate reductase 1, cytochrome b(NR), gamma subunit	-0.87804	0.0567621	-0.77351	0.27298	0.164871	-0.88454	0.0913789	0	0.552	0.929	0.04	0	0	0	0	0	0
530	STM0540	ybcI	putative membrane-bound metal-dependent hydrolases	-0.87812	0.0563531	-0.83382	-0.251264	-0.0974554	-0.94827	-0.182195	0	0.53	0.812	0.094	0	0	0	0	0	0
3630	STM3749	yicI	putative alpha-xylosidase	-0.87826	0.0556374	-0.72254	0.716037	0.385837	-0.83858	0.288671	0	0.564	0.885	0.22	0	0	0	0	0	0
1860	STM1908	yecM	putative cytoplasmic protein	-0.87829	0.0554841	-0.70528	0.866069	0.460777	-0.82446	0.349284	0	0.536	0.841	0	0	0	0	0	0	0
2745	STM2840		putative flavoprotein	-0.87844	0.0547172	-0.76417	0.354168	0.204443	-0.88003	0.110739	0	0.537	0.929	0.121	0	0	0	0	0	0
3950	STM4093	ftsN	essential cell division protein	-0.87868	0.0534903	-0.67607	1.11998	0.586734	-0.81626	0.384484	0	0.59	0.793	0.157	0	0	0	0	0	0
3568	STM3687	mtlR	repressor for mtl	-0.87885	0.0526212	-0.73677	0.592343	0.322482	-0.86443	0.177705	0	0.536	0.903	0	0	0	0	0	0	0
1966	STM2027	cbiH	synthesis of vitamin B12 adenosyl cobalamide precursor	-0.8789	0.0523656	-0.79789	0.0610574	0.0567115	-0.86322	0.182899	0	0.57	0.154	0.154	0	0	0	0	0	0
3696	STM3820		putative cytochrome c peroxidase	-0.87907	0.0514966	-0.79463	0.0893949	0.0704457	-0.90961	-0.0162391	0	0.483	0.811	0.073	0	0	0	1	0	1
4254	STM4419		sugar (and other) transporter	-0.87911	0.0512921	-0.8346	-0.258044	-0.103376	-0.90047	0.0229962	0	0.497	0.339	0.262	0	0	0	0	0	0
3329	STM3443	bfr	bacterioferrin, an iron storage homoprotein	-0.87913	0.0511898	-0.93368	-1.1193	-0.534053	-0.98783	-0.352014	0	0.424	0.88	0.215	0	0	0	0	0	0
4425	STM4595		putative fimbrial chaparone protein	-0.87952	0.0491961	-0.73388	0.617464	0.33333	-0.8534	0.225054	0	0.503	0.304	0	0	0	0	0	0	0
1960	STM2021	cboQ	synthesis of vitamin B12 adenosyl cobalamide precursor	-0.8796	0.0487871	-0.73008	0.650495	0.349641	-0.83634	0.298287	0	0.544	0	0	0	0	0	0	0	0
1704	STM1750	tdk	thymidine kinase	-0.87975	0.0480203	-0.77152	0.290278	0.169149	-0.85825	0.204234	0	0.489	0.922	0.22	0	0	0	0	0	0
2843	STM2938		putative cytoplasmic protein	-0.87991	0.0472023	-0.75838	0.404498	0.22585	-0.88793	0.0768266	0	0.558	0.853	0.085	0	0	0	0	0	0
3921	STM4064	cdh	CDP-diacylglycerol phosphotidylhydrolase	-0.87995	0.0469978	-0.76749	0.325309	0.186154	-0.89748	0.0358314	0	0.543	0.785	0	0	0	0	0	0	0
4128	STM4288	phnB	putative cytoplasmic protein	-0.88025	0.0454642	-0.82551	-0.179029	-0.0667826	-0.91972	-0.0596383	0	0.549	0.823	0.136	0	0	0	0	0	0
1245	STM1284	yeaH	putative cytoplasmic protein	-0.88028	0.0453108	-0.7989	0.052278	0.0487944	-0.88545	0.0874725	0	0.519	0.914	0	0	0	0	0	0	0
2278	STM2342	ulaA	putative inner membrane protein	-0.88029	0.0452597	-0.74113	0.554443	0.299852	-0.84025	0.281503	0	0.523	0.274	0	0	0	0	0	0	0
3407	STM3524	glpG	protein of glp regulon	-0.88031	0.0451574	-0.74742	0.499768	0.272463	-0.8557	0.21518	0	0.54	0.888	0.152	0	0	1	0	0	1
316	STM0325		putative IS3 transposase	-0.88033	0.0450552	-0.72855	0.663795	0.354425	-0.80226	0.444582	0	0.544	0.748	0.109	0	0	0	0	0	0
2151	STM2213	yeiU	putative permease	-0.88044	0.0444929	-0.76111	0.380767	0.21263	-0.89269	0.0563934	0	0.509	0.803	0.142	0	0	0	0	0	0
2760	STM2855	hypB	hydrogenase-3 accessory protein, assembly of metallocenter	-0.88057	0.0438283	-0.76177	0.37503	0.209429	-0.87816	0.118766	0	0.573	0.948	0.176	1	0	0	0	0	1
2238	STM2302		putative inner membrane protein	-0.8806	0.0436749	-0.78804	0.146678	0.0951767	-0.92728	-0.0920911	0	0.603	0.171	0.18	0	0	0	0	0	0
2376	STM2447		putative outer membrane lipoprotein	-0.88093	0.0419879	-0.62513	1.56277	0.80238	-0.78509	0.518288	0	0.562	0.801	0.12	0	0	1	0	0	1
1069	STM1101	hpaG	4-hydroxyphenylacetate catabolism	-0.88104	0.0414255	-0.72113	0.728293	0.384859	-0.83701	0.295411	0	0.564	0.172	0.205	1	1	0	0	0	2
3011	STM3112	mltC	membrane-bound lytic murein transglycosylase C	-0.88113	0.0409654	-0.78935	0.135291	0.0881284	-0.90699	-0.00499222	0	0.518	0.911	0	0	0	0	0	0	0
1605	STM1651	nifJ	putative pyruvate-flavodoxin oxidoreductase	-0.88114	0.0409143	-0.70385	0.8785	0.459707	-0.82599	0.342716	0	0.552	0.928	0	0	0	0	0	0	0
2062	STM2123	yegE	putative PAS/PAC domain; Diguanylate cyclase/phosphodiesterase domain 1, Diguanylate cyclase/phosphodiesterase domain 2,	-0.88117	0.040761	-0.70473	0.87085	0.455806	-0.83037	0.323914	0	0.539	0.436	0	0	0	0	0	0	0
518	STM0528	allD	ureidoglycolate dehydrogenase	-0.88139	0.0396363	-0.81377	-0.0769794	-0.0186716	-0.91824	-0.0532851	0	0.5	0.868	0.074	1	0	0	0	0	1
2041	STM2102	wzxC	putative export protein in colanic acid gene cluster	-0.8816	0.0385627	-0.75038	0.474038	0.2563	-0.8577	0.206595	0	0.518	0.858	0.132	0	0	0	0	0	0
3922	STM4065		putative permease of the Na+:galactoside symporter family	-0.88162	0.0384605	-0.8819	-0.669199	-0.315369	-0.9671	-0.263026	0	0.505	0.356	0.23	0	0	0	0	0	0
3688	STM3805	yidH	putative inner membrane protein	-0.88172	0.0379492	-0.75417	0.441093	0.239521	-0.88432	0.0923233	0	0.539	0.948	0.2	0	0	0	0	0	0
4269	STM4434		putative permease	-0.88217	0.0356488	-0.83966	-0.302028	-0.13319	-0.9328	-0.115787	0	0.515	0.203	0.164	1	0	0	0	0	1
4482	PSLT091	traW	conjugative transfer: assembly	-0.88218	0.0355976	-0.78382	0.183361	0.109479	-0.91806	-0.0525124	0	0.617	0	0.152	0	0	0	0	0	0
3042	STM3144	hybF	putative hydrogenase expression/formation protein	-0.88239	0.0345241	-0.64745	1.36876	0.70164	-0.77174	0.575595	0	0.557	0.85	0.106	0	0	1	0	0	1
330	STM0340	stbA	putative fimbriae; major subunit	-0.88256	0.033655	-0.81528	-0.0901051	-0.028225	-0.91459	-0.0376167	0	0.472	0.275	0.129	0	0	0	0	0	0
425	STM0435	yajQ	putative cytoplasmic protein	-0.8826	0.0334505	-0.83399	-0.252742	-0.109646	-0.95033	-0.191038	0	0.511	0.905	0.172	0	0	0	0	0	0
1724	STM1773	ychA	putative transcriptional regulator	-0.88269	0.0329904	-0.7519	0.460825	0.246908	-0.84848	0.246174	0	0.491	0.859	0	0	0	0	0	0	0
3305	STM3419	rpmJ	50S ribosomal subunit protein X	-0.88282	0.0323258	-0.83957	-0.301246	-0.13446	-0.93145	-0.109992	0	0.483	1	0.5	0	0	0	0	0	0
2228	STM2292	yfaX	putative transcriptional regulator	-0.88293	0.0317635	-0.84507	-0.349054	-0.158645	-0.92536	-0.0838491	0	0.515	0.873	0.092	0	0	0	0	0	0
1137	STM1171	flgN	flagellar biosynthesis: belived to be export chaperone for FlgK and FlgL	-0.88298	0.0315079	-0.75465	0.436921	0.234214	-0.8896	0.0696578	0	0.538	0.8	0.207	0	0	0	0	0	0
199	STM0199	stfF	putative minor fimbrial subunit	-0.88333	0.0297186	-0.7647	0.349561	0.18964	-0.88617	0.0843818	0	0.485	0.481	0.158	0	0	0	0	0	0
180	STM0180	panD	aspartate 1-decarboxylase	-0.88363	0.028185	-0.81019	-0.0458603	-0.00883766	-0.90774	-0.00821175	0	0.537	0.96	0	0	0	0	0	0	0
2733	STM2828	oraA	regulator	-0.88378	0.0274181	-0.79195	0.112691	0.0700545	-0.89822	0.0326548	0	0.518	0.873	0.139	0	0	0	0	0	0
1611	STM1657		putative methyl-accepting chemotaxis protein	-0.88381	0.0272648	-0.86732	-0.542462	-0.257599	-0.95395	-0.206577	0	0.49	0.339	0.146	0	0	0	0	1	1
1938	STM1993	yedJ	putative hydrolase	-0.8843	0.0247598	-0.73167	0.636674	0.330717	-0.83878	0.287813	0	0.55	0.727	0.091	0	0	0	0	0	0
1304	STM1343	nlpC	lipoprotein	-0.88464	0.0230216	-0.87113	-0.575581	-0.27628	-0.96698	-0.262511	0	0.487	0.864	0.169	1	1	0	0	0	2
890	STM0918		Fels-1 prophage; putative minor tail protein	-0.88475	0.0224593	-0.67819	1.10155	0.562004	-0.82732	0.337007	0	0.572	0	0.119	0	0	0	0	0	0
1275	STM1314	celC	PTS family, sugar specific enzyme III for cellobiose, arbutin, and salicin	-0.88477	0.0223571	-0.81003	-0.0444695	-0.0110562	-0.9268	-0.0900306	0	0.496	0.878	0.191	0	0	0	0	0	0
1128	STM1162	dinI	DNA damage-inducible protein I, inhibits UmuD processing	-0.88507	0.0208234	-0.68247	1.06435	0.542584	-0.81309	0.398092	0	0.518	0.852	0.086	0	0	0	0	0	0
3650	STM3770		putative phosphotransferase system enzyme IIC	-0.88507	0.0208234	-0.77134	0.291843	0.156333	-0.88823	0.0755388	0	0.561	0.281	0	0	0	0	0	0	0
121	STM0121	ftsL	cell division protein; ingrowth of wall at septum	-0.88518	0.0202611	-0.80725	-0.0203043	-2.16403e-05	-0.91492	-0.0390333	0	0.521	0.983	0	0	0	0	0	0	0
3877	STM4021	yihS	putative isomerase	-0.88529	0.0196987	-0.64146	1.42082	0.720261	-0.78163	0.533141	0	0.558	0.92	0	0	0	0	0	0	0
3563	STM3682	selB	selenocysteinyl-tRNA-specific translation factor	-0.88534	0.0194431	-0.82359	-0.16234	-0.0714483	-0.91778	-0.0513105	0	0.571	0.849	0.17	0	0	0	0	0	0
1117	STM1151	mdoH	membrane glycosyltransferase; synthesis of membrane-derived oligosaccharide (MDO)/synthesis of OPGs (osmoregulated periplasmic glucans)	-0.88539	0.0191875	-0.75172	0.46239	0.240789	-0.88983	0.0686705	0	0.563	0.94	0.057	0	0	0	0	0	0
1037	STM1068	lonH	putative protease	-0.88539	0.0191875	-0.80585	-0.00813484	0.00552633	-0.91734	-0.0494217	0	0.535	0.858	0.068	0	0	0	0	0	0
534	STM0544	fimI	fimbrial protein internal segment	-0.88596	0.0162735	-0.83586	-0.268997	-0.126362	-0.94342	-0.161375	0	0.542	0.299	0.045	0	0	0	0	0	0
2938	STM3039	idi	isopentenyldiphosphate isomerase	-0.88598	0.0161713	-0.83278	-0.242224	-0.113026	-0.93402	-0.121024	0	0.521	0.702	0.32	0	0	0	0	0	0
3940	STM4083	yiiR	putative inner membrane protein	-0.88606	0.0157623	-0.81057	-0.0491634	-0.0167005	-0.93508	-0.125574	0	0.558	0.894	0.19	0	0	0	0	0	0
548	STM0561		Sensor protein	-0.8864	0.0140242	-0.90281	-0.850959	-0.418467	-0.94643	-0.174296	0	0.495	0.716	0.248	0	0	0	0	0	0
3155	STM3259		PTS family galactitol-specific enzyme IIB	-0.88645	0.0137686	-0.80023	0.040717	0.0272428	-0.92047	-0.0628578	0	0.493	0.777	0.117	0	0	0	0	0	0
1858	STM1906	yecP	putative enzyme	-0.88648	0.0136152	-0.85113	-0.401731	-0.194058	-0.95637	-0.216966	0	0.553	0.929	0.158	0	0	0	0	0	0
2443	STM2515	ratA	putative outer membrane protein	-0.88654	0.0133085	-0.6988	0.922397	0.467853	-0.8481	0.247805	0	0.59	0	0	1	0	0	0	0	1
3798	STM3936	hemX	uroporphyrinogen III methylase	-0.88665	0.0127461	-0.71851	0.751068	0.381907	-0.83614	0.299146	0	0.557	0.887	0.154	0	0	0	0	0	0
1343	STM1383	ttrA	Tetrathionate reductase complex, subunit A	-0.88672	0.0123883	-0.77677	0.244643	0.128516	-0.90499	0.00359318	0	0.576	0.161	0	0	0	0	0	0	0
1578	STM1624		putative cytoplasmic protein	-0.8868	0.0119793	-0.69447	0.960035	0.486007	-0.82947	0.327778	0	0.544	0.875	0	0	0	0	0	0	0
1077	STM1109		putative periplasmic protein	-0.88681	0.0119282	-0.77433	0.265853	0.13889	-0.87354	0.138599	0	0.526	0.218	0.218	1	1	0	0	0	2
1337	STM1377	lpp	murein lipoprotein, links outer and inner membranes	-0.88692	0.0113658	-0.85841	-0.465012	-0.226823	-0.9897	-0.360041	0	0.517	0.962	0.231	0	0	0	0	0	0
2235	STM2299	yfbG	paral putative transformylase	-0.88713	0.0102923	-0.82413	-0.167034	-0.0783707	-0.93446	-0.122913	0	0.542	0.794	0.144	0	0	0	0	0	0
462	STM0472	maa	maltose o-acetyltransferase	-0.88714	0.0102412	-0.91139	-0.925541	-0.45765	-0.97856	-0.312221	0	0.488	0.792	0.169	0	0	0	0	0	0
1469	STM1514	ydeJ	putative Competence-damaged protein	-0.8872	0.00993442	-0.82803	-0.200934	-0.0955	-0.91792	-0.0519114	0	0.488	0.56	0	0	0	0	0	0	0
3488	STM3606	yhjB	putative transcriptional regulator (LuxR/UhpA familiy)	-0.88723	0.00978106	-0.79395	0.0953058	0.0525434	-0.88177	0.10327	0	0.483	0.725	0.08	0	0	0	0	0	0
3485	STM3603	treF	cytoplasmic trehalase	-0.88725	0.00967881	-0.81057	-0.0491634	-0.0197423	-0.92929	-0.100719	0	0.552	0.922	0.35	0	0	0	0	0	0
1573	STM1619		cryptic aminoglycoside resistance gene	-0.88777	0.00702047	-0.82175	-0.146345	-0.0696625	-0.90653	-0.00301758	0	0.519	0.207	0.186	1	0	0	0	0	1
2217	STM2281		putative transcriptional regulator, LysR family	-0.88791	0.00630476	-0.85032	-0.39469	-0.194193	-0.92007	-0.0611407	0	0.481	0.264	0	0	1	0	0	0	1
333	STM0343		putative Diguanylate cyclase/phosphodiesterase domain 1	-0.88795	0.00610028	-0.89589	-0.790807	-0.392353	-1.00031	-0.405587	0	0.485	0.296	0	1	0	0	0	0	1
760	STM0786	ybhC	putative pectinesterase	-0.88813	0.00518008	-0.61073	1.68794	0.846562	-0.76115	0.621055	0	0.573	0.871	0	0	0	0	0	0	0
1912	STM1965	yedE	paral putative membrane component of transport system	-0.88817	0.00497559	-0.75366	0.445526	0.225251	-0.88797	0.0766549	0	0.569	0.876	0.074	0	0	1	0	0	1
1781	STM1830	manX	Sugar Specific PTS family, mannose-specific enzyme IIAB	-0.88823	0.00466886	-0.78406	0.181275	0.0929717	-0.89631	0.0408538	0	0.529	0.947	0.068	0	0	0	0	0	0
621	STM0634	ybeF	putative transcriptional regulator, LysR family	-0.88851	0.00323745	-0.82018	-0.132698	-0.0647304	-0.91393	-0.0347836	0	0.51	0.571	0	0	0	0	0	0	0
2199	STM2262	eco	ecotin, a serine protease inhibitor	-0.8886	0.00277735	-0.79515	0.0848748	0.0438261	-0.92949	-0.101578	0	0.551	0.793	0	0	0	1	0	0	1
2272	STM2336		putative cytoplasmic protein	-0.88871	0.00221501	-0.70668	0.8539	0.428057	-0.84807	0.247934	0	0.541	0.954	0.113	0	0	0	0	0	0
2397	STM2468	eutQ	putative ethanolamine utilization protein	-0.88876	0.0019594	-0.73377	0.61842	0.31019	-0.89766	0.0350587	0	0.572	0.895	0.135	0	0	0	0	0	0
538	STM0548	fimF	putative fimbrial protein	-0.88884	0.00155042	-0.78659	0.159283	0.0804165	-0.89725	0.0368187	0	0.55	0.57	0.134	0	0	0	0	0	0
604	STM0617	rna	RNase I, cleaves phosphodiester bond between any two nucleotides	-0.88911	0.000170131	-0.69631	0.944041	0.472106	-0.82552	0.344734	0	0.548	0.731	0.175	0	0	0	0	0	0
177	STM0177	stiA	putative fimbrial subunit	-0.8892	-0.000289966	-0.83577	-0.268214	-0.134252	-0.92571	-0.0853516	0	0.525	0.318	0	0	0	0	0	0	0
2268	STM2332		putative hydrolase of HD superfamily	-0.88931	-0.000852308	-0.82626	-0.185549	-0.0932005	-0.93945	-0.144333	0	0.499	0.915	0.191	0	0	0	0	0	0
1957	STM2018	cobU	bifunctional: cobinamide kinase; cobinamide phosphate guanylyltransferase	-0.88938	-0.00121016	-0.7611	0.380854	0.189822	-0.87729	0.122501	0	0.55	0.823	0.105	0	0	0	0	0	0
1785	STM1834	yebN	putative YebN family transport protein	-0.88939	-0.00126128	-0.74237	0.543665	0.271202	-0.85427	0.221319	0	0.526	0.903	0.097	0	0	0	0	0	0
2152	STM2214	spr	putative lipoprotein, suppresses thermosensitivity of prc mutants at low osmolality	-0.8896	-0.00233484	-0.86033	-0.481702	-0.242018	-0.95989	-0.232076	0	0.5	0.926	0.184	0	0	0	0	0	0
4057	STM4217		putative soluble lytic murein transglycosylase	-0.88968	-0.00274382	-0.76013	0.389286	0.193271	-0.87504	0.13216	0	0.567	0.219	0.08	0	0	0	0	0	0
2331	STM2396	pgtA	Phosphoglycerate transport: activator	-0.88984	-0.00356177	-0.87307	-0.592444	-0.298003	-0.95279	-0.201598	0	0.519	0.292	0	0	0	0	0	0	0
4206	STM4371	yjfJ	putative Phage shock protein A, IM30, suppresses sigma54-dependent transcription	-0.89007	-0.00473758	-0.69663	0.941259	0.468261	-0.81427	0.393027	0	0.544	0.884	0.272	0	0	0	0	0	0
921	STM0950		homologue of slsA in STM	-0.89018	-0.00529992	-0.80142	0.0303729	0.0125365	-0.89858	0.0311094	0	0.539	0.418	0.191	0	0	0	0	0	0
1308	STM1347	aroH	3-deoxy-D-arabinoheptulosonate-7-phosphate synthase (DAHP synthetase), tryptophan repressible	-0.8904	-0.0064246	-0.81078	-0.0509888	-0.0287067	-0.91196	-0.0263269	0	0.528	0.908	0	0	0	0	0	0	0
2761	STM2856	hypC	putative hydrogenase expression/formation protein	-0.8907	-0.00795826	-0.77124	0.292712	0.142377	-0.90584	-5.56171e-05	0	0.559	0.967	0	0	0	0	0	0	0
1864	STM1912	flhE	flagellar protein	-0.89084	-0.00867396	-0.75475	0.436052	0.213689	-0.90282	0.0129083	0	0.589	0.754	0	0	1	0	0	0	1
2870	STM2965	yqcC	putative cytoplasmic protein	-0.89095	-0.00923631	-0.76895	0.312618	0.151691	-0.90529	0.00230537	0	0.574	0.807	0.119	0	0	0	0	0	0
1340	STM1380	orf32	putative hydrolase or acyltransferase	-0.89096	-0.00928743	-0.84857	-0.379478	-0.194383	-0.93814	-0.13871	0	0.511	0.192	0.212	1	0	0	0	0	1
2556	STM2637	rseC	regulator of sigma E (sigma 24) factor	-0.89119	-0.0104632	-0.7262	0.684222	0.33688	-0.87204	0.145038	0	0.582	0.818	0.138	0	0	0	0	0	0
2227	STM2291	yfaW	paral putative galactonate dehydratase	-0.89127	-0.0108722	-0.72598	0.686135	0.337631	-0.82955	0.327434	0	0.533	0.96	0.17	0	0	0	0	0	0
1270	STM1309		putative nuclease subunit of the excinuclease complex	-0.89128	-0.0109233	-0.71647	0.7688	0.378938	-0.8312	0.320351	0	0.55	0.765	0.053	0	0	0	0	0	0
4376	STM4543	dnaC	chromosome replication; initiation and chain elongation	-0.89131	-0.0110767	-0.8281	-0.201543	-0.10631	-0.93317	-0.117375	0	0.512	0.939	0.196	0	0	0	0	0	0
3604	STM3723	rfaQ	lipopolysaccharide core biosynthesis; modification of heptose region of core	-0.89134	-0.0112301	-0.8247	-0.171988	-0.0916092	-0.92309	-0.0741047	0	0.483	0.782	0.11	0	0	0	0	0	0
256	STM0263	rnhA	RNase HI, degrades RNA of DNA-RNA hybrids	-0.89163	-0.0127126	-0.87137	-0.577667	-0.29519	-0.93907	-0.142702	0	0.501	0.929	0.335	0	0	0	0	0	0
3245	STM3353	oadG-1	putative sodium ion pump oxaloacetate decarboxylase gamma chain	-0.89175	-0.0133261	-0.77373	0.271068	0.128871	-0.91196	-0.0263269	0	0.614	0	0.238	0	0	0	0	0	0
3240	STM3347	yhcB	putative periplasmic protein	-0.89186	-0.0138884	-0.83784	-0.286208	-0.150048	-0.95604	-0.215549	0	0.53	0.97	0.224	0	0	0	0	0	0
596	STM0609	ahpF	alkyl hydroperoxide reductase, F52a subunit; detoxification of hydroperoxides	-0.89215	-0.0153709	-0.81854	-0.118443	-0.0669068	-0.91303	-0.0309201	0	0.55	0.954	0.159	0	0	0	0	0	0
2519	STM2590		Gifsy-1 prophage: similar to tail assembly protein I in phage lambda	-0.89282	-0.0187961	-0.77667	0.245512	0.113358	-0.91404	-0.0352558	0	0.607	0	0.274	0	0	0	0	0	0
1079	STM1111	yccD	putative cytoplasmic protein	-0.89288	-0.0191028	-0.6695	1.17709	0.578992	-0.82202	0.359758	0	0.554	0.743	0	0	0	0	0	0	0
2905	STM3004	ygdP	putative invasion protein; NTP pyrophosphohydrolase	-0.89294	-0.0194096	-0.81191	-0.0608114	-0.0401105	-0.88665	0.0823213	0	0.508	0.955	0.176	0	0	0	0	0	0
3924	STM4067		putative ADP-ribosylglycohydrolase	-0.89313	-0.0203809	-0.67852	1.09868	0.53915	-0.80278	0.44235	0	0.57	0.295	0.246	0	0	0	0	0	0
3969	STM4113	frwB	PTS system fructose-like IIB component 1	-0.89318	-0.0206365	-0.71984	0.739507	0.359435	-0.82723	0.337394	0	0.503	0.962	0	0	0	0	0	0	0
2715	STM2805	nrdH	glutaredoxin-like protein; hydrogen donor	-0.8932	-0.0207387	-0.77282	0.278978	0.12912	-0.87641	0.126279	0	0.555	0.852	0.21	0	0	0	0	0	0
4272	STM4437	yjgA	putative cytoplasmic protein	-0.8933	-0.02125	-0.80323	0.0146395	-0.00330524	-0.93307	-0.116946	0	0.544	0.951	0.197	0	0	0	0	0	0
4063	STM4223	yjbF	putative outer membrane lipoprotein	-0.89355	-0.022528	-0.62406	1.57207	0.774773	-0.77854	0.546405	0	0.558	0.865	0.072	0	0	0	0	0	0
4504	PSLT012	orf7	putative bacterial regulatory proteins, luxR family	-0.8936	-0.0227836	-0.81929	-0.124962	-0.0738728	-0.96678	-0.261653	0	0.591	0.319	0.138	0	0	0	0	1	1
4402	STM4572	stjB	putative fimbrial usher protein	-0.89363	-0.022937	-0.86728	-0.542115	-0.282526	-0.96969	-0.274145	0	0.494	0.385	0.041	0	0	0	0	0	0
4503	PSLT011	srgA	sdiA-regulated gene; putative thiol-disulfide isomerase or thioredoxin	-0.89377	-0.0236527	-0.70472	0.870937	0.423642	-0.82455	0.348898	0	0.564	0.295	0.101	1	0	0	0	1	2
1598	STM1644	ydbL	putative periplasmic protein	-0.89378	-0.0237038	-0.80901	-0.0356031	-0.0296535	-0.93427	-0.122097	0	0.523	0.701	0	0	0	0	0	0	0
2752	STM2847	hycG	hydrogenase activity	-0.89401	-0.0248796	-0.70299	0.885975	0.430548	-0.83572	0.300948	0	0.596	0.969	0.192	0	0	0	0	0	0
4023	STM4183	aceB	malate synthase A	-0.89409	-0.0252886	-0.71567	0.775754	0.375233	-0.82043	0.366584	0	0.52	0.908	0	0	0	0	0	0	0
1799	STM1848	yebS	putative inner membrane protein	-0.89426	-0.0261577	-0.64651	1.37693	0.675385	-0.76612	0.59972	0	0.524	0.857	0	0	0	0	0	0	0
3456	STM3574	yhhM	putative inner membrane protein	-0.89426	-0.0261577	-0.83291	-0.243354	-0.134756	-0.98561	-0.342484	0	0.531	0.797	0.244	0	0	0	0	0	0
3838	STM3977	rfaH	transcriptional activator affecting biosynthesis of lipopolysaccharide core, F pilin, and haemolysin	-0.89427	-0.0262088	-0.87128	-0.576885	-0.301547	-0.97163	-0.282472	0	0.492	0.877	0.111	0	0	0	0	0	0
3017	STM3119		putative monoamine oxidase	-0.89474	-0.0286115	-0.79416	0.0934804	0.0324344	-0.89544	0.0445885	0	0.501	0.223	0.149	0	0	0	0	0	0
2656	STM2745		putative inner membrane protein	-0.89476	-0.0287138	-0.71548	0.777406	0.374346	-0.87599	0.128081	0	0.633	0	0	1	0	0	0	0	1
3705	STM3829	dgoK	2-oxo-3-deoxygalactonate kinase	-0.89501	-0.0299918	-0.69574	0.948996	0.459502	-0.83891	0.287255	0	0.564	0.818	0	0	0	1	0	0	1
2586	STM2672	yfiN	putative diguanylate cyclase/phosphodiesterase	-0.89512	-0.0305542	-0.78561	0.167801	0.0686235	-0.88962	0.069572	0	0.505	0.749	0	0	0	0	0	0	0
1749	STM1798	ycgR	putative inner membrane protein	-0.89514	-0.0306564	-0.74394	0.530017	0.249681	-0.863	0.183844	0	0.527	0.725	0	0	0	0	0	0	0
3910	STM4053		putative C4-dicarboxylate transport system	-0.89514	-0.0306564	-0.83906	-0.296813	-0.163734	-0.94292	-0.159229	0	0.507	0.246	0.129	1	0	0	0	0	1
1314	STM1353	ydiR	putative electron transfer flavoprotein	-0.89546	-0.0322923	-0.80288	0.0176819	-0.00730522	-0.91188	-0.0259835	0	0.539	0.73	0.225	0	0	0	0	0	0
1531	STM1577	narZ	nitrate reductase 2, alpha subunit	-0.89557	-0.0328546	-0.78697	0.155979	0.0615624	-0.91397	-0.0349553	0	0.555	0.907	0	0	0	0	0	0	0
1252	STM1291	yeaA	putative domain frequently associated with peptide methionine sulfoxide reductase	-0.89559	-0.0329569	-0.89534	-0.786026	-0.409492	-0.96527	-0.255171	0	0.512	0.796	0.51	0	0	1	0	0	1
3560	STM3679		putative cytoplasmic protein	-0.89562	-0.0331103	-0.692	0.981506	0.474198	-0.82609	0.342287	0	0.571	0	0	0	0	1	0	0	1
1044	STM1075	helD	DNA helicase IV	-0.89569	-0.0334681	-0.75155	0.463868	0.2152	-0.87514	0.13173	0	0.556	0.839	0.136	0	0	0	0	0	0
1996	STM2057	pduW	Propanediol utilization: propionate kinase	-0.89611	-0.0356152	-0.83111	-0.227707	-0.131661	-0.91966	-0.0593807	0	0.528	0.433	0.057	0	0	0	0	0	0
2900	STM2999	ppdB	prepilin peptidase dependent protein B, putative component in type IV pilin biogenesis	-0.89636	-0.0368933	-0.69881	0.92231	0.442708	-0.8349	0.304469	0	0.544	0.674	0.134	0	0	0	0	0	0
160	STM0160	yacL	putative cytoplasmic protein	-0.89642	-0.0372	-0.75221	0.458131	0.210465	-0.88757	0.078372	0	0.519	0.85	0.125	0	0	0	0	0	0
2972	STM3073		putative ABC-type cobalt transport system, permease component CbiQ and related transporter	-0.89648	-0.0375067	-0.62081	1.60032	0.781409	-0.77377	0.566881	0	0.597	0	0	0	0	0	0	0	0
3415	STM3533		putative bacterial transcriptional regulator	-0.89655	-0.0378646	-0.79981	0.0443678	0.00325161	-0.89291	0.055449	0	0.506	0.386	0.131	0	0	0	0	0	0
2650	STM2739		Fels-2 prophage: similar to int protein in phage 186	-0.89657	-0.0379668	-0.88435	-0.690496	-0.364231	-0.97459	-0.295179	0	0.498	0.194	0	0	0	0	0	0	0
3818	STM3957	pldA	outer membrane phospholipase A	-0.89668	-0.0385292	-0.71018	0.823476	0.392473	-0.83979	0.283477	0	0.505	0.92	0	0	0	0	0	0	0
3130	STM3233	yqjG	putative glutathione S-transferase	-0.89674	-0.0388359	-0.7957	0.080094	0.020629	-0.88723	0.0798315	0	0.524	0.924	0.18	0	0	0	0	0	0
312	STM0320	phoE	outer membrane pore protein e (e,ic,nmpab)	-0.89688	-0.0395516	-0.78208	0.198486	0.0794671	-0.88873	0.0733925	0	0.472	0.883	0.046	0	0	0	0	0	0
493	STM0503	ybbM	putative YbbM family transport protein, metal resistance protein	-0.89701	-0.0402162	-0.74008	0.56357	0.261677	-0.86648	0.168905	0	0.515	0.88	0.127	0	0	0	0	0	0
3082	STM3184	yqiB	putative cytoplasmic protein	-0.89734	-0.0419032	-0.74274	0.540448	0.249273	-0.87607	0.127738	0	0.502	0.95	0	0	0	0	0	0	0
1910	STM1963	amyA	cytoplasmic alpha-amylase	-0.89748	-0.0426189	-0.79274	0.105824	0.0316024	-0.89411	0.0502978	0	0.514	0.887	0.128	0	0	0	0	0	0
1574	STM1620		putative oxidase	-0.8976	-0.0432324	-0.77527	0.257682	0.107225	-0.86633	0.169549	0	0.483	0.305	0.33	0	0	0	0	0	0
3673	STM3793		putative sugar kinase, ribokinase family	-0.89773	-0.043897	-0.86507	-0.522904	-0.283401	-0.91839	-0.053929	0	0.49	0.353	0.379	0	0	0	0	1	1
436	STM0445	yajG	putative lipoprotein	-0.89778	-0.0441526	-0.71072	0.818782	0.387315	-0.84718	0.251754	0	0.511	0.848	0	0	0	0	0	0	0
3648	STM3768		putative selenocysteine synthase [L-seryl-tRNA(Ser) selenium transferase	-0.89779	-0.0442037	-0.76108	0.381028	0.168412	-0.87392	0.136967	0	0.58	0.173	0.133	0	0	0	0	0	0
1236	STM1275	yaoF	putative hemolysin	-0.89784	-0.0444593	-0.6772	1.11015	0.532848	-0.8262	0.341815	0	0.558	0.639	0.229	0	0	0	0	0	0
816	STM0844	pflE	putative pyruvate formate lyase activating enzyme	-0.89785	-0.0445104	-0.73385	0.617725	0.286607	-0.85163	0.232652	0	0.556	0.88	0.147	0	0	0	0	0	0
2106	STM2167	dld	D-lactate dehydrogenase, NADH independent	-0.89792	-0.0448683	-0.73769	0.584346	0.269739	-0.87917	0.114431	0	0.539	0.905	0	0	0	0	0	0	0
2888	STM2985	ygdK	putative SufE protein probably involved in Fe-S center assembly	-0.89797	-0.0451239	-0.86458	-0.518645	-0.281884	-0.97539	-0.298613	0	0.573	0.864	0.218	0	0	0	0	0	0
2739	STM2834	slrB	PTS family, glucitol/sorbitol-specific	-0.89825	-0.0465553	-0.71975	0.740289	0.346867	-0.86677	0.16766	0	0.577	0.808	0.2	0	0	0	0	0	0
344	STM0354		putative transcriptional regulator	-0.89836	-0.0471177	-0.79628	0.0750523	0.0139673	-0.90023	0.0240264	0	0.545	0.351	0.188	0	0	0	0	0	0
1967	STM2028	cbiG	synthesis of vitamin B12 adenosyl cobalamide precursor	-0.89865	-0.0486002	-0.75152	0.464128	0.207764	-0.88914	0.0716325	0	0.557	0	0	0	0	0	0	0	0
911	STM0939	ybjD	homology with RecF protein	-0.89868	-0.0487536	-0.78232	0.1964	0.073823	-0.92021	-0.0617417	0	0.554	0.897	0.043	0	0	0	0	0	0
1046	STM1077	yccT	putative periplasmic protein	-0.89873	-0.0490092	-0.7446	0.52428	0.237636	-0.87012	0.15328	0	0.53	0.845	0.141	0	0	0	0	0	0
2685	STM2774	iroC	putative ATP binding cassette (ABC) transporter	-0.89889	-0.0498271	-0.80753	-0.0227382	-0.0362827	-0.91719	-0.0487778	0	0.59	0.136	0.269	0	0	0	0	0	0
3973	STM4117	yijO	paral putative regulator (AraC/XylS family)	-0.89891	-0.0499294	-0.73005	0.650756	0.300413	-0.84745	0.250595	0	0.564	0.887	0.173	0	0	0	0	0	0
4114	STM4274	yjcH	putative inner membrane protein	-0.89901	-0.0504406	-0.73877	0.574958	0.262259	-0.86508	0.174915	0	0.487	0.875	0	0	0	0	0	0	0
1510	STM1556		putative Na+/H+ antiporter	-0.89908	-0.0507984	-0.82873	-0.207019	-0.128909	-0.95336	-0.204045	0	0.513	0.141	0	0	0	0	0	0	0
2708	STM2798	ygaP	putative rhodanese-related sulfurtransferase	-0.8992	-0.0514119	-0.79037	0.126425	0.0375065	-0.90943	-0.0154664	0	0.565	0.749	0.171	0	0	0	0	0	0
1150	STM1184	flgL	flagellar biosynthesis; hook-filament junction protein	-0.89959	-0.0534057	-0.71152	0.811828	0.379211	-0.82079	0.365039	0	0.537	0.823	0.12	0	0	0	0	0	0
1937	STM1992	dcm	DNA cytosine methylase	-0.89998	-0.0553994	-0.60546	1.73375	0.839177	-0.74988	0.669434	0	0.538	0.834	0.109	0	0	0	0	0	0
565	STM0578	nfnB	dihydropteridine reductase/oxygen-insensitive NAD(P)H nitroreductase	-0.90027	-0.056882	-0.71345	0.795052	0.369085	-0.81557	0.387446	0	0.545	0.885	0.18	1	0	0	0	0	1
489	STM0499	ybbI	putative heavy metal transcriptional repressor (MerR family)	-0.90029	-0.0569842	-0.86123	-0.489525	-0.273255	-0.96768	-0.265516	0	0.524	0.891	0.188	0	0	0	0	0	0
3338	STM3452	yheO	putative regulator	-0.90031	-0.0570864	-0.86274	-0.502651	-0.279869	-0.976	-0.301231	0	0.474	0.979	0.142	0	0	0	0	0	0
1934	STM1989	yedI	putative inner membrane protein	-0.90041	-0.0575977	-0.82113	-0.140956	-0.0992769	-0.94596	-0.172279	0	0.538	0.855	0.119	0	0	0	0	0	0
269	STM0276		putative cytoplasmic protein	-0.90043	-0.0576999	-0.79468	0.0889603	0.0156302	-0.90987	-0.0173552	0	0.538	0.143	0	0	0	0	0	0	0
3873	STM4017	yihO	putative GPH family transport protein	-0.90059	-0.0585179	-0.85756	-0.457624	-0.258071	-0.9538	-0.205934	0	0.471	0.799	0.235	0	0	0	0	0	0
1279	STM1318	katE	catalase; hydroperoxidase HPII(III), RpoS dependent	-0.90089	-0.0600515	-0.77672	0.245078	0.092513	-0.87942	0.113358	0	0.541	0.888	0.267	0	0	1	0	0	1
2571	STM2652	pssA	phosphatidylserine synthase (CDP-diacylglycerol-serine O-phosphatidyltransferase)	-0.90089	-0.0600515	-0.84533	-0.351315	-0.205683	-0.94251	-0.157469	0	0.499	0.894	0.193	0	0	0	0	0	0
4527	PSLT051	samB	putative cytoplasmic protein	-0.90095	-0.0603582	-0.69381	0.965772	0.452707	-0.82835	0.332586	0	0.539	0.524	0.118	0	1	0	0	0	1
4529	PSLT055	samA	mutagenesis by UV and mutagens; related to umuDC operon	-0.90108	-0.0610228	-0.77911	0.224302	0.0816398	-0.87692	0.124089	0	0.555	0.479	0	0	0	0	0	0	0
2703	STM2793	gabP	APC family, gamma-aminobutyrate transport protein, RpoS dependent	-0.90118	-0.0615341	-0.85693	-0.452147	-0.256841	-0.93685	-0.133172	0	0.514	0.921	0.215	0	0	0	0	1	1
4343	STM4510		putative aspartate racemase	-0.90136	-0.0624542	-0.80923	-0.0375155	-0.0499849	-0.91628	-0.0448714	0	0.557	0.201	0.127	0	0	0	0	0	0
3046	STM3148	hybB	putative cytochrome Ni/Fe component of hydrogenase-2	-0.90145	-0.0629143	-0.79617	0.0760085	0.00654708	-0.9501	-0.190051	0	0.529	0.964	0	0	0	0	0	0	0
2723	STM2813	emrR	transcriptional repressor of emrAB operon (MarR family)	-0.90164	-0.0638857	-0.86236	-0.499348	-0.281617	-0.96393	-0.249419	0	0.489	0.926	0.193	0	0	0	0	0	0
2679	STM2768		putative transposase	-0.90175	-0.064448	-0.86877	-0.555067	-0.309757	-1.00271	-0.415889	0	0.535	0.859	0.253	0	0	0	0	0	0
4200	STM4365	yjeT	putative inner membrane protein	-0.9019	-0.0652148	-0.82011	-0.13209	-0.0986523	-0.94378	-0.162921	0	0.518	0.892	0	0	0	0	0	0	0
1085	STM1117	agp	glucose-1-phosphatase	-0.90203	-0.0658794	-0.7742	0.266983	0.100552	-0.91667	-0.0465456	0	0.55	0.833	0.208	0	0	0	0	0	0
1349	STM1389	orf319	putative inner membrane protein	-0.90221	-0.0667996	-0.78497	0.173364	0.0532824	-0.90726	-0.00615125	0	0.558	0.245	0.091	0	0	0	0	0	0
2504	STM2576	yfhL	putative ferredoxin	-0.90221	-0.0667996	-0.8726	-0.588359	-0.327579	-0.9518	-0.197348	0	0.473	0.942	0.326	1	0	0	0	0	1
2601	STM2687	yfjG	putative Oligoketide cyclase/lipid transport protein	-0.90241	-0.067822	-0.7939	0.0957405	0.0139592	-0.86887	0.158645	0	0.498	0.886	0.272	1	0	0	0	0	1
1747	STM1796	treA	trehalase, periplasmic	-0.90248	-0.0681799	-0.75329	0.448743	0.190281	-0.88668	0.0821925	0	0.554	0.782	0.314	0	0	0	0	0	0
3111	STM3214	yqjH	putative transporter	-0.90254	-0.0684866	-0.79098	0.121123	0.026318	-0.91594	-0.0434119	0	0.558	0.714	0.133	0	0	0	0	0	0
1524	STM1570	fdnG	putative molybdopterin oxidoreductases	-0.90256	-0.0685889	-0.77297	0.277674	0.104543	-0.90121	0.0198196	0	0.545	0.933	0.039	0	0	0	0	0	0
3322	STM3436	rpsS	30S ribosomal subunit protein S19	-0.90276	-0.0696113	-0.99461	-1.64893	-0.859271	-1.0213	-0.495691	0	0.493	0.891	0.293	0	0	0	0	0	0
1739	STM1788		putative Ni/Fe-hydrogenase 1 b-type cytochrome subunit	-0.90287	-0.0701737	-0.77885	0.226562	0.0781944	-0.91812	-0.05277	0	0.554	0.786	0.136	0	0	0	0	0	0
570	STM0583	ybdK	putative cytoplasmic protein	-0.90324	-0.0720652	-0.75409	0.441789	0.184862	-0.9023	0.0151405	0	0.541	0.844	0.051	0	0	0	0	0	0
640	STM0653	ybeL	putative cytoplasmic protein	-0.90333	-0.0725253	-0.78535	0.170061	0.048768	-0.93371	-0.119693	0	0.558	0.93	0.191	0	0	0	0	0	0
4450	PSLT048	tlpA	alpha-helical coiled coil protein	-0.90335	-0.0726275	-0.75101	0.468562	0.197967	-0.89771	0.034844	0	0.585	0	0.213	0	1	0	0	0	1
4432	PSLT002		putative phospholipase D	-0.90344	-0.0730876	-0.85006	-0.39243	-0.232759	-0.94216	-0.155966	0	0.546	0.238	0.231	0	0	0	0	0	0
1725	STM1774	sirC	Regulation of invasion genes	-0.90411	-0.0765128	-0.76506	0.346432	0.13496	-0.89371	0.0520148	0	0.514	0.729	0.14	0	0	0	0	0	0
2561	STM2642	yfiC	putative transferase	-0.90414	-0.0766661	-0.81664	-0.101927	-0.0892965	-0.92348	-0.0757788	0	0.537	0.845	0.147	0	0	0	0	0	0
1830	STM1878	exoX	DNA exonuclease X, degrades ss and ds DNA with 3'-5' polarity	-0.90424	-0.0771774	-0.79983	0.044194	-0.0164917	-0.91164	-0.0249533	0	0.52	0.858	0.159	0	0	0	0	0	0
1191	STM1226	potA	ABC superfamily (atp_bind), spermidine/putrescine transporter	-0.90449	-0.0784554	-0.86743	-0.543419	-0.310937	-0.95064	-0.192369	0	0.496	0.942	0	0	0	0	0	0	0
1954	STM2015	erfK	putative periplasmic protein	-0.90465	-0.0792734	-0.73825	0.579478	0.250102	-0.86542	0.173455	0	0.525	0.786	0.061	1	0	0	0	0	1
1715	STM1764	narG	nitrate reductase 1, alpha subunit	-0.90475	-0.0797846	-0.84052	-0.309504	-0.194644	-0.98052	-0.320634	0	0.563	0.953	0.019	0	0	0	0	0	0
3355	STM3470	fic	putative cell filamentation protein, stationary phase induced gene, affects cell division	-0.90491	-0.0806025	-0.80588	-0.00839562	-0.0444991	-0.94715	-0.177387	0	0.553	0.865	0.195	0	0	0	0	0	0
2080	STM2142	yegT	putative MFS family transport protein	-0.90505	-0.0813182	-0.83076	-0.224665	-0.152992	-0.9559	-0.214948	0	0.517	0.953	0.168	0	0	0	0	0	0
741	STM0766	dcoC	Oxalacetate decarboxylase: gamma chain	-0.90534	-0.0828008	-0.73494	0.60825	0.262725	-0.89118	0.0628754	0	0.62	0	0.21	0	0	0	0	0	0
2282	STM2346		putative NTP pyrophosphohydrolase	-0.90546	-0.0834142	-0.77284	0.278804	0.0976951	-0.89204	0.0591836	0	0.545	0.908	0.207	0	0	0	0	0	0
2901	STM3000	ppdA	prepilin peptidase dependent protein A, putative component in type IV pilin biogenesis	-0.90556	-0.0839255	-0.80688	-0.0170881	-0.0505068	-0.951	-0.193914	0	0.562	0.654	0.141	0	0	0	0	0	0
3852	STM3996	yihE	putative homoserine kinase type II, protein kinase	-0.90591	-0.0857147	-0.72226	0.718471	0.316378	-0.85223	0.230076	0	0.49	0.86	0.159	0	0	0	0	0	0
3101	STM3203	ygiM	putative SH3 domain protein	-0.9061	-0.086686	-0.76237	0.369815	0.141564	-0.89981	0.0258294	0	0.507	0.922	0.186	0	0	0	0	0	0
3277	STM3385	fis	site-specific DNA inversion stimulation factor	-0.9064	-0.0882197	-0.86843	-0.552111	-0.320165	-0.97661	-0.30385	0	0.466	1	0.153	0	0	0	0	0	0
2719	STM2809	proV	ABC superfamily (atp_bind), glycine/betaine/proline transport protein	-0.90641	-0.0882708	-0.86503	-0.522557	-0.305414	-0.95149	-0.196017	0	0.505	0.95	0	0	0	0	0	0	0
3653	STM3773		putative NtrC family transcriptional regulators, ATPase domain	-0.90643	-0.0883731	-0.66378	1.22681	0.569217	-0.80794	0.4202	0	0.549	0	0	0	0	0	0	0	0
2404	STM2476	ypfG	putative periplasmic protein	-0.90644	-0.0884242	-0.65826	1.27479	0.593183	-0.81463	0.391482	0	0.568	0.772	0.086	0	0	0	0	0	0
3866	STM4010		putative hydrolase	-0.90648	-0.0886287	-0.92273	-1.02411	-0.556371	-0.99495	-0.382578	0	0.474	0.377	0.172	0	0	0	0	0	0
3931	STM4074	ego	putative ABC-type sugar, aldose transport system, ATPase component	-0.9066	-0.0892421	-0.80033	0.0398477	-0.0246972	-0.87347	0.138899	0	0.516	0.751	0.139	0	0	0	0	0	0
2830	STM2925	nlpD	lipoprotein	-0.90668	-0.0896511	-0.73744	0.586519	0.248434	-0.85443	0.220632	0	0.521	0.857	0.156	0	0	0	0	0	0
1163	STM1198	pabC	4-amino-4-deoxychorismate lyase	-0.90691	-0.0908269	-0.83736	-0.282035	-0.186431	-0.91471	-0.0381319	0	0.514	0.699	0.178	0	0	0	0	0	0
599	STM0612		putative hydrogenase protein	-0.90693	-0.0909292	-0.81899	-0.122354	-0.106642	-0.93694	-0.133559	0	0.539	0.335	0.13	0	0	0	0	0	0
732	STM0757	pnuC	NMN family, nucleoside/purine/pyrimidine transporter	-0.90696	-0.0910825	-0.67742	1.10824	0.50858	-0.80101	0.449948	0	0.508	0.887	0.13	0	0	0	0	0	0
4360	STM4527	mrr	restriction of methylated adenine	-0.90699	-0.0912359	-0.76569	0.340956	0.12486	-0.91873	-0.0553885	0	0.527	0.773	0.109	0	0	0	0	0	0
3273	STM3381	yhdT	putative inner membrane protein	-0.90705	-0.0915426	-0.71348	0.794791	0.351624	-0.8668	0.167531	0	0.55	0.825	0	0	1	0	0	0	1
437	STM0446	bolA	morphogene; putative regulator of murein genes (BolA family)	-0.90708	-0.091696	-0.80732	-0.0209128	-0.0563044	-0.8949	0.0469065	0	0.489	0.924	0.438	0	0	0	0	0	0
2874	STM2970	sdaC	putative HAAAP family, serine transport protein	-0.90721	-0.0923606	-0.83409	-0.253611	-0.172986	-0.94862	-0.183697	0	0.533	0.956	0.152	0	0	0	0	0	0
3216	STM3323	yhbJ	putative P-loop-containing kinase	-0.90739	-0.0932808	-0.84729	-0.368352	-0.230816	-0.95801	-0.224006	0	0.535	0.986	0.165	0	0	0	0	0	0
492	STM0502	ybbL	putative ABC-type sugar/spermidine/putrescine transport system, ATPase component	-0.90741	-0.093383	-0.84585	-0.355835	-0.224609	-0.92577	-0.0856091	0	0.476	0.742	0.316	0	0	0	0	0	0
846	STM0874	mdaA	oxygen-insensitive NADPH nitroreductase	-0.90748	-0.0937409	-0.81805	-0.114183	-0.103962	-0.91339	-0.0324655	0	0.542	0.879	0.129	0	0	0	0	0	0
1429	STM1473	ompN	outer membrane protein N, non-specific porin	-0.90753	-0.0939965	-0.85377	-0.424679	-0.259338	-0.97099	-0.279725	0	0.477	0.822	0	0	0	0	0	1	1
1149	STM1183	flgK	flagellar biosynthesis, hook-filament junction protein 1	-0.90784	-0.0955813	-0.7462	0.510372	0.207396	-0.85067	0.236773	0	0.518	0.794	0.09	0	1	0	0	0	1
1122	STM1156	yceA	putative enzyme related to sulfurtransferases	-0.90808	-0.0968082	-0.78409	0.181014	0.0421028	-0.90138	0.0190898	0	0.511	0.889	0.254	0	0	0	0	0	0
1090	STM1123		putative periplasmic protein	-0.90814	-0.0971149	-0.75285	0.452567	0.177726	-0.89806	0.0333416	0	0.585	0.198	0.198	0	0	0	0	0	0
1943	STM1998	umuD	error-prone repair: SOS-response transcriptional repressors (LexA homologs, RecA-mediated autopeptidases)	-0.90826	-0.0977284	-0.85518	-0.436936	-0.267332	-0.95295	-0.202285	0	0.504	0.727	0.165	0	0	0	0	0	0
469	STM0479		putative transposase	-0.90845	-0.0986997	-0.7289	0.660753	0.281026	-0.86523	0.174271	0	0.53	0.489	0.106	0	0	0	0	0	0
573	STM0586	fes	enterochelin esterase	-0.90852	-0.0990576	-0.75375	0.444744	0.172843	-0.91112	-0.0227211	0	0.601	0.681	0.104	0	0	0	0	0	0
3210	STM3317	yrbK	putative inner membrane protein	-0.90852	-0.0990576	-0.84236	-0.325498	-0.212278	-0.97655	-0.303592	0	0.475	0.911	0.12	0	0	0	0	0	0
1312	STM1351	ydiT	putative ferredoxin	-0.90868	-0.0998755	-0.83997	-0.304723	-0.202299	-0.97159	-0.282301	0	0.485	0.804	0.268	0	0	0	0	0	0
3127	STM3230	yqjE	putative inner membrane protein	-0.90885	-0.100745	-0.82628	-0.185722	-0.143234	-0.96648	-0.260365	0	0.54	0.879	0	0	0	1	0	0	1
3128	STM3231	yqjK	putative inner membrane protein	-0.90893	-0.101154	-0.68779	1.0181	0.458474	-0.86547	0.173241	0	0.602	0.889	0	0	0	0	0	0	0
208	STM0208	dgt	deoxyguanosine triphosphate triphosphohydrolase	-0.90895	-0.101256	-0.82886	-0.208149	-0.154702	-0.94061	-0.149313	0	0.491	0.885	0.071	1	0	0	0	0	1
4378	STM4545		putative inner membrane protein	-0.90898	-0.101409	-0.78184	0.200572	0.0495814	-0.90271	0.0133805	0	0.539	0.618	0.14	0	0	0	0	0	0
503	STM0513	ybbB	putative ATPase	-0.90903	-0.101665	-0.74186	0.548098	0.223217	-0.89205	0.0591407	0	0.559	0.78	0.088	0	0	0	0	0	0
4010	STM4166	yjaD	putative NTP pyrophosphohydrolases containing a Zn-finger, probably nucleic-acid-binding	-0.90927	-0.102892	-0.83003	-0.218319	-0.160606	-0.93847	-0.140126	0	0.55	0.926	0.257	0	0	0	0	0	0
3012	STM3113	nupG	MFS family, nucleoside transport	-0.90945	-0.103812	-0.78097	0.208134	0.0521613	-0.91948	-0.058608	0	0.515	0.907	0.165	0	0	0	0	0	0
3559	STM3678		putative bacterial regulatory helix-turn-helix proteins, araC family	-0.90947	-0.103914	-0.7848	0.174842	0.035464	-0.91038	-0.0195445	0	0.545	0.214	0.118	0	0	0	0	0	0
2727	STM2817	luxS	quorum sensing protein, produces autoinducer - acyl-homoserine lactone-signaling molecules	-0.90952	-0.10417	-0.72954	0.655189	0.27551	-0.8463	0.255532	0	0.534	0.942	0.123	0	0	0	0	0	0
1843	STM1891	znuA	ABC superfamily (bind_prot) high affinity Zn transport protein	-0.90957	-0.104425	-0.88614	-0.706055	-0.40524	-0.98267	-0.329864	0	0.5	0.853	0	0	0	0	0	0	0
742	STM0768	dcoB	Oxalacetate decarboxylase: beta chain	-0.90958	-0.104476	-0.73593	0.599644	0.247584	-0.89449	0.0486665	0	0.642	0	0.083	1	0	0	0	0	1
1475	STM1520	marR	transcriptional repressor of marRAB operon, multiple antibiotic resistance protein	-0.90966	-0.104885	-0.89758	-0.805497	-0.455191	-0.99357	-0.376654	0	0.482	0.292	0	0	0	0	0	0	0
23	STM0023	bcfC	fimbrial usher	-0.90967	-0.104937	-0.79776	0.0621874	-0.0213746	-0.91392	-0.0347406	0	0.545	0.515	0	0	0	0	0	0	0
1804	STM1853	prpA	serine/threonine protein phosphatase	-0.90984	-0.105806	-0.87705	-0.62704	-0.366423	-0.99192	-0.369571	0	0.525	0.634	0.167	0	0	0	0	0	0
895	STM0923		Fels-1 prophage; putative tail assembly protein	-0.91014	-0.107339	-0.76812	0.319833	0.106247	-0.92712	-0.0914043	0	0.591	0	0.36	0	0	0	0	0	0
187	STM0187	sfsA	regulator for maltose metabolism	-0.91046	-0.108975	-0.89146	-0.752299	-0.430637	-0.9806	-0.320978	0	0.503	0.829	0.085	0	0	0	0	0	0
2236	STM2300		putative cytoplasmic protein	-0.91073	-0.110356	-0.79281	0.105215	-0.00257011	-0.94811	-0.181508	0	0.571	0.729	0.074	0	0	0	0	0	0
320	STM0330		putative 3-isopropylmalate isomerase (dehydratase), subunit with LeuC	-0.91081	-0.110764	-0.89694	-0.799934	-0.455349	-0.98807	-0.353044	0	0.524	0.361	0.159	0	0	0	0	0	0
4106	STM4266	soxR	redox-sensing transcriptional activator SoxR, contains iron-sulfur center for redox-sensing (MerR family)	-0.91083	-0.110867	-0.82575	-0.181115	-0.145991	-0.95325	-0.203573	0	0.548	0.961	0.145	0	0	0	0	0	0
3529	STM3647	yiaF	putative outer membrane lipoprotein	-0.9109	-0.111225	-0.68854	1.01158	0.450179	-0.85083	0.236086	0	0.552	0.89	0	0	0	0	0	0	0
144	STM0144	ppdD	putative major component of type IV pilin, prelipin peptidase dependent protein	-0.91102	-0.111838	-0.79358	0.0985221	-0.00665799	-0.94224	-0.15631	0	0.538	0.883	0.179	0	0	0	0	0	0
3253	STM3361	yhcN	putative outer membrane protein	-0.91107	-0.112094	-0.7122	0.805917	0.346912	-0.85684	0.210287	0	0.51	0.793	0	0	0	0	0	0	0
1859	STM1907	cutC	copper homeostasis protein	-0.91134	-0.113474	-0.76916	0.310793	0.0986594	-0.89433	0.0493534	0	0.544	0.476	0.431	0	0	0	0	0	0
162	STM0162		putative inner membrane protein	-0.9114	-0.113781	-0.76077	0.383723	0.134971	-0.89964	0.0265591	0	0.578	0.262	0.102	0	0	0	0	0	0
1973	STM2034	cibB	synthesis of vitamin B12 adenosyl cobalamide precursor	-0.91144	-0.113985	-0.78728	0.153285	0.0196498	-0.92426	-0.0791271	0	0.591	0.06	0.025	0	0	0	0	0	0
3801	STM3939	cyaA	adenylate cyclase	-0.91146	-0.114087	-0.82677	-0.189982	-0.152035	-0.96244	-0.243022	0	0.544	0.96	0.044	0	0	0	0	0	0
2762	STM2857	hypD	putative hydrogenase expression/formation protein	-0.9118	-0.115826	-0.71006	0.824519	0.354347	-0.87237	0.143621	0	0.581	0.944	0.038	0	0	0	0	0	0
212	STM0212		putative inner membrane protein	-0.91182	-0.115928	-0.9172	-0.976044	-0.545986	-0.99298	-0.374121	0	0.513	0.397	0.194	0	0	0	0	0	0
2455	STM2527		putative polyferredoxin	-0.91199	-0.116797	-0.75411	0.441615	0.162409	-0.90639	-0.0024166	0	0.599	0.16	0.094	0	0	0	0	0	0
1390	STM1432	ydhO	putative cell wall-associated hydrolase	-0.91213	-0.117513	-0.81282	-0.0687215	-0.0931171	-0.94535	-0.16966	0	0.513	0.676	0.106	0	0	1	0	0	1
3043	STM3145	hybE	putative hydrogenase	-0.9122	-0.11787	-0.66127	1.24863	0.565378	-0.83034	0.324043	0	0.566	0.802	0.173	0	0	0	0	0	0
1076	STM1108	hpaA	4-hydroxyphenylacetate catabolism	-0.9122	-0.11787	-0.76545	0.343042	0.112586	-0.88679	0.0817203	0	0.521	0.171	0.158	0	0	0	0	0	0
2599	STM2685	smpA	small membrane protein A	-0.91232	-0.118484	-0.80786	-0.0256068	-0.0720453	-0.95421	-0.207694	0	0.518	0.402	0.179	0	0	0	0	0	0
2013	STM2074	hisB	bifunctional: imidazoleglycerol-phosphate dehydratase; histidinol-phosphatase	-0.91257	-0.119762	-0.8479	-0.373654	-0.246708	-0.95646	-0.217352	0	0.522	0.961	0.107	0	0	0	0	0	0
2135	STM2196		putative D-serine dehydratase	-0.91266	-0.120222	-0.80421	0.00612085	-0.0570506	-0.90093	0.0210215	0	0.544	0.499	0	0	0	0	0	1	1
1446	STM1491		ABC-type proline/glycine betaine transport systems, ATPase component	-0.91275	-0.120682	-0.8547	-0.432763	-0.276723	-0.95983	-0.231818	0	0.531	0.332	0.209	0	0	0	0	0	0
2388	STM2459	eutA	CPPZ-55 prophage; chaperonin in ethanolamine utilization	-0.91292	-0.121551	-0.60761	1.71507	0.796757	-0.79303	0.484204	0	0.615	0.899	0	0	0	0	0	0	0
200	STM0200	stfG	putative minor fimbrial subunit; putative adhesin	-0.91296	-0.121756	-0.87568	-0.615132	-0.368444	-1.01146	-0.453451	0	0.547	0.415	0.153	0	0	0	0	0	0
96	STM0096	hepA	RNA polymerase associated protein, putative SNF2 family RNA helicase	-0.91298	-0.121858	-0.84235	-0.325411	-0.223634	-0.96297	-0.245298	0	0.57	0.931	0.123	0	1	0	0	0	1
3500	STM3618	yhjN	putative cellulose synthase	-0.913	-0.12196	-0.63608	1.46759	0.672815	-0.79653	0.469179	0	0.569	0.841	0	0	0	0	0	0	0
2697	STM2787		tricarboxylic transport	-0.91304	-0.122165	-0.72579	0.687786	0.282811	-0.88322	0.0970453	0	0.581	0	0	0	0	0	0	0	0
2799	STM2894	invC	surface presentation of antigens; secretory proteins	-0.91305	-0.122216	-0.83432	-0.25561	-0.188913	-0.94458	-0.166355	0	0.543	0.367	0.244	1	1	0	0	1	3
971	STM1001		putative leucine response regulator	-0.91321	-0.123034	-0.86027	-0.48118	-0.302107	-0.95562	-0.213746	0	0.49	0.307	0.098	0	0	0	0	0	0
2896	STM2995	ptr	protease III	-0.91324	-0.123187	-0.81949	-0.1267	-0.124944	-0.93292	-0.116302	0	0.521	0.89	0.247	0	0	0	0	0	0
1992	STM2053	pduS	Propanediol utilization: polyhedral bodies	-0.91335	-0.123749	-0.76542	0.343303	0.109777	-0.90077	0.0217084	0	0.615	0.253	0.131	0	0	0	0	0	0
568	STM0581		putative regulatory protein	-0.91335	-0.123749	-0.80939	-0.0389063	-0.0813279	-0.90691	-0.00464881	0	0.501	0.416	0.159	0	0	0	0	0	0
2153	STM2215	rtn	putative membrane protein involved in resistance to lambda and N4 phages	-0.91337	-0.123852	-0.80403	0.0076855	-0.0580831	-0.92732	-0.0922628	0	0.519	0.705	0.048	0	0	1	0	0	1
3963	STM4106	katG	catalase; hydroperoxidase HPI(I)	-0.91354	-0.124721	-0.72487	0.695783	0.285531	-0.8628	0.184702	0	0.577	0.917	0.037	0	0	0	0	0	0
2728	STM2818	gshA	gamma-glutamate-cysteine ligase	-0.91362	-0.12513	-0.81784	-0.112358	-0.118744	-0.94253	-0.157555	0	0.522	0.936	0	0	0	0	0	0	0
444	STM0453	ybaV	putative DNA uptake protein and related DNA-binding proteins	-0.91394	-0.126766	-0.80006	0.0421947	-0.0422855	-0.9388	-0.141543	0	0.527	0.839	0.234	0	0	0	0	0	0
4372	STM4539		putative glucosamine-fructose-6-phosphate aminotransferase	-0.91396	-0.126868	-0.814	-0.0789787	-0.102923	-0.92187	-0.0688676	0	0.53	0.218	0.235	0	0	0	0	0	0
3336	STM3450	yheM	putative oxidation of intracellular sulfur	-0.91399	-0.127021	-0.77938	0.221955	0.0474671	-0.91936	-0.0580929	0	0.539	0.847	0	0	0	0	0	0	0
1424	STM1468	fumA	fumarase A (fumarate hydratase class I), aerobic isozyme	-0.91412	-0.127686	-0.72604	0.685613	0.278964	-0.86346	0.181869	0	0.547	0.898	0	0	0	0	0	0	0
943	STM0973	pflB	pyruvate formate lyase I, induced anaerobically	-0.91426	-0.128402	-0.81722	-0.106968	-0.117685	-0.93144	-0.109949	0	0.517	0.961	0	0	0	0	0	0	0
21	STM0021	bcfA	fimbrial subunit	-0.91432	-0.128708	-0.7939	0.0957405	-0.0164839	-0.93257	-0.114799	0	0.518	0.417	0.139	0	0	0	0	0	0
3375	STM3491	yrfC	putative inner membrane protein	-0.91442	-0.129219	-0.84138	-0.316979	-0.223099	-1.00821	-0.439499	0	0.594	0.486	0.162	0	0	0	0	0	0
4033	STM4193	yjbC	putative pseudouridine synthase	-0.91444	-0.129322	-0.75312	0.45022	0.160449	-0.85737	0.208012	0	0.504	0.91	0.26	0	0	0	0	0	0
623	STM0636	ybeD	putative cytoplasmic protein	-0.91451	-0.12968	-0.89395	-0.773944	-0.451812	-1.00533	-0.427136	0	0.464	0.977	0	0	0	0	0	0	0
2564	STM2645	yfiK	paral putative transport protein	-0.91458	-0.130037	-0.88167	-0.6672	-0.398619	-0.9952	-0.383651	0	0.514	0.841	0	0	0	0	0	0	0
4227	STM4392	priB	primosomal replication protein N	-0.91467	-0.130498	-0.6983	0.926743	0.398123	-0.83066	0.32267	0	0.532	0.99	0.202	0	0	0	0	0	0
195	STM0195	stfA	putative fimbrial subunit	-0.9147	-0.130651	-0.78808	0.146331	0.00783993	-0.91266	-0.0293318	0	0.521	0.387	0.102	0	0	0	0	0	0
3244	STM3351	oadB	putative sodium ion pump oxaloacetate decarboxylase beta chain	-0.91497	-0.132031	-0.73539	0.604338	0.236154	-0.89614	0.0415836	0	0.644	0	0	0	0	0	0	0	0
796	STM0823	ybiJ	putative periplasmic protein	-0.915	-0.132185	-0.78708	0.155023	0.0114193	-0.93312	-0.11716	0	0.519	0.802	0.128	0	0	0	0	0	0
2405	STM2477	yffH	putative pyrophosphohydrolase	-0.9151	-0.132696	-0.93668	-1.14537	-0.639035	-1.02574	-0.51475	0	0.489	0.874	0.267	0	0	0	0	0	0
365	STM0375	ampH	penicillin- binding protein	-0.91524	-0.133411	-0.73739	0.586953	0.226771	-0.85665	0.211102	0	0.533	0.918	0.202	0	0	0	0	0	0
610	STM0623	citD	citrate lyase acyl carrier protein (gamma chain)	-0.91528	-0.133616	-0.78366	0.184752	0.0255678	-0.9552	-0.211943	0	0.571	0.908	0.265	0	0	0	0	0	0
328	STM0338	stbC	putative fimbriae; usher	-0.91551	-0.134792	-0.79386	0.0960882	-0.0193518	-0.9165	-0.0458158	0	0.539	0.322	0.046	0	0	0	0	1	1
3228	STM3335	yhcH	putative cytoplasmic protein	-0.91562	-0.135354	-0.82136	-0.142955	-0.139155	-0.96149	-0.238944	0	0.535	0.8	0.174	0	0	0	0	0	0
1319	STM1358	aroD	3-dehydroquinate dehydratase	-0.9158	-0.136274	-0.81704	-0.105404	-0.120839	-0.95598	-0.215292	0	0.516	0.802	0.075	0	0	0	0	0	0
2458	STM2530		putative anaerobic dimethylsulfoxide reductase	-0.91605	-0.137552	-0.80842	-0.0304746	-0.0840135	-0.90188	0.0169435	0	0.546	0.429	0	0	0	0	0	0	0
400	STM0410		putative regulatory protein	-0.91616	-0.138115	-0.88132	-0.664157	-0.401136	-0.97456	-0.29505	0	0.529	0.222	0.117	0	0	0	0	0	0
1422	STM1466	ydgA	putative periplasmic protein	-0.91684	-0.141591	-0.84792	-0.373828	-0.25771	-1.00291	-0.416748	0	0.525	0.799	0	0	0	0	0	0	0
4143	STM4303	dcuR	response regulator in two-component regulatory system with DcuS, regulates anaerobic fumarate respiration	-0.91691	-0.141949	-0.87769	-0.632604	-0.387276	-0.98397	-0.335444	0	0.488	0.887	0.113	1	0	0	0	0	1
4315	STM4481	idnR	L-idonate regulator (GalR/LacI family)	-0.91697	-0.142256	-0.87731	-0.6293	-0.385778	-0.96915	-0.271826	0	0.504	0.892	0.211	0	0	0	0	0	0
3226	STM3333		putative purine-cytosine permease	-0.9172	-0.143431	-0.75503	0.433618	0.145093	-0.86625	0.169892	0	0.555	0.823	0.129	0	0	0	0	0	0
458	STM0468	ylaB	putative diguanylate cyclase/phosphodiesterase domain 2	-0.91748	-0.144863	-0.88769	-0.719529	-0.432196	-1.00548	-0.42778	0	0.522	0.672	0	0	0	0	0	0	0
931	STM0960	ftsK	cell division protein, required for cell division and chromosome partitioning	-0.91749	-0.144914	-0.78562	0.167714	0.0114002	-0.94116	-0.151674	0	0.586	0.41	0.097	0	0	0	0	0	0
48	STM0048	slpA	FKBP-type peptidyl-prolyl cis-trans isomerase (rotamase)	-0.91756	-0.145272	-0.84673	-0.363484	-0.254378	-0.96322	-0.246371	0	0.548	0.919	0.201	0	0	0	0	0	0
2623	STM2711		Fels-2 prophage: similar to gpS for completion of tail, in phage P2	-0.91773	-0.146141	-0.7493	0.483426	0.168642	-0.92538	-0.083935	0	0.637	0	0.155	0	0	0	0	0	0
4034	STM4194	yjbD	putative cytoplasmic protein	-0.91833	-0.149208	-0.76517	0.345476	0.0981338	-0.92888	-0.0989594	0	0.555	0.922	0.211	0	0	1	0	0	1
1332	STM1372	sufD	required for stability of iron-sulfur component of FhuF	-0.91836	-0.149362	-0.7509	0.469518	0.160078	-0.87614	0.127438	0	0.538	0.787	0.021	0	0	0	0	0	0
909	STM0937	hcp	hybrid cluster protein; similar to prismane-protein homolog	-0.91837	-0.149413	-0.81092	-0.0522058	-0.100809	-0.94886	-0.184728	0	0.569	0.964	0.036	0	0	0	0	0	0
669	STM0689	citA	citrate-proton symporter	-0.91845	-0.149822	-0.88736	-0.71666	-0.433241	-0.98605	-0.344373	0	0.541	0.325	0.198	0	0	0	0	0	0
1559	STM1605	ydcN	putative oxidoreductase/putative repressor	-0.91847	-0.149924	-0.80863	-0.0323	-0.0911119	-0.93078	-0.107116	0	0.53	0.725	0	0	0	0	0	0	0
1663	STM1709	yciS	putative inner membrane protein	-0.91881	-0.151662	-0.76232	0.370249	0.109294	-0.91251	-0.0286879	0	0.516	0.931	0	0	0	0	0	0	0
52	STM0052		putative transcription regulator sensor for citrate	-0.91881	-0.151662	-0.83045	-0.22197	-0.186816	-0.93038	-0.105398	0	0.487	0.461	0.083	1	1	0	0	0	2
2587	STM2673	rplS	50S ribosomal subunit protein L19	-0.91888	-0.15202	-0.88883	-0.729438	-0.440729	-0.95432	-0.208166	0	0.487	0.974	0.252	1	1	0	0	0	2
2342	STM2407	ypeC	putative periplasmic protein	-0.91904	-0.152838	-0.81283	-0.0688085	-0.110823	-0.97768	-0.308443	0	0.555	0.917	0.204	0	0	0	0	0	0
1825	STM1873		putative periplasmic or exported protein	-0.91908	-0.153042	-0.78879	0.140159	-0.00644161	-0.95824	-0.224993	0	0.535	0.786	0.205	0	0	0	0	0	0
3945	STM4088	yiiU	putative cytoplasmic protein	-0.91912	-0.153247	-0.85747	-0.456841	-0.305044	-0.97456	-0.29505	0	0.473	0.949	0.392	0	0	0	0	0	0
2263	STM2327	nuoB	NADH dehydrogenase I chain B	-0.91912	-0.153247	-0.87356	-0.596704	-0.374975	-0.987	-0.348451	0	0.545	0.991	0.364	0	1	0	0	0	1
1101	STM1135	ycdW	paral putative oxidoreductase	-0.91913	-0.153298	-0.75613	0.424056	0.135379	-0.86419	0.178735	0	0.551	0.779	0.247	0	0	0	0	0	0
3069	STM3171	ygiK	putative integral membrane protein, possible transporter	-0.91923	-0.153809	-0.86542	-0.525947	-0.339878	-0.97122	-0.280712	0	0.512	0.331	0.078	1	0	0	0	0	1
2820	STM2915	ygbM	putative endonuclease	-0.91928	-0.154065	-0.77868	0.22804	0.0369877	-0.88645	0.0831798	0	0.573	0.798	0.419	0	0	0	0	0	0
1581	STM1627		alcohol dehydrogenase class III	-0.91993	-0.157388	-0.93929	-1.16806	-0.662724	-0.99934	-0.401423	0	0.534	0.801	0.642	0	0	0	0	0	0
54	STM0054		putative oxalacetate decarboxylase, subunit beta	-0.91998	-0.157643	-0.74786	0.495943	0.16915	-0.90881	-0.0128049	0	0.64	0	0.081	0	0	0	0	0	0
3524	STM3642	tag	3-methyl-adenine DNA glycosylase I, constitutive	-0.92006	-0.158052	-0.79056	0.124773	-0.0166394	-0.89929	0.0280616	0	0.52	0.824	0.093	0	0	0	0	0	0
1720	STM1769	ychN	putative ACR involved in intracellular sulfur reduction	-0.92006	-0.158052	-0.85846	-0.465447	-0.31175	-0.98855	-0.355105	0	0.521	0.923	0.179	0	0	0	0	0	0
2520	STM2591		Gifsy-1 prophage: similar to tail assembly protein K in phage lambda	-0.92019	-0.158717	-0.75593	0.425794	0.133539	-0.90637	-0.00233075	0	0.583	0.131	0.251	0	0	0	0	0	0
4391	STM4561	osmY	hyperosmotically inducible periplasmic protein, RpoS-dependent stationary phase gene	-0.92022	-0.15887	-0.83745	-0.282818	-0.220844	-0.9658	-0.257446	0	0.498	0.893	0.171	0	0	0	0	0	0
405	STM0415	ybaD	putative transcriptional regulator	-0.92023	-0.158921	-0.9089	-0.903896	-0.531409	-1.01169	-0.454438	0	0.501	0.96	0.168	0	0	0	0	0	0
3131	STM3234	yhaH	putative inner membrane protein	-0.92053	-0.160455	-0.89035	-0.742651	-0.451553	-1.04994	-0.618634	0	0.529	0.876	0.248	0	0	0	0	0	0
3520	STM3638	lpfC	long polar fimbrial outer membrane usher protein	-0.9206	-0.160813	-0.84595	-0.356704	-0.258758	-0.96392	-0.249376	0	0.554	0.457	0.055	0	0	0	0	0	0
433	STM0442	cyoB	cytochrome o ubiquinol oxidase subunit I	-0.92061	-0.160864	-0.78739	0.152329	-0.00426769	-0.90845	-0.0112596	0	0.538	0.958	0.312	1	0	0	0	0	1
357	STM0367	prpR	regulator for prp operon (EBP family)	-0.92094	-0.162551	-0.73324	0.623027	0.230238	-0.87141	0.147742	0	0.558	0.782	0.131	0	0	0	0	0	0
3298	STM3412	zntR	Zn(II)-responsive transcriptional regulator (MerR family)	-0.921	-0.162858	-0.9108	-0.920412	-0.541635	-1.01777	-0.480538	0	0.501	0.929	0.206	0	0	0	0	0	0
2429	STM2501	ppk	polyphosphate kinase, component of RNA degradosome	-0.92101	-0.162909	-0.86633	-0.533857	-0.348383	-0.97226	-0.285177	0	0.49	0.962	0.062	0	0	0	0	0	0
3139	STM3242	tdcD	propionate kinase/acetate kinase II, anaerobic	-0.92122	-0.163982	-0.86623	-0.532988	-0.348485	-0.97013	-0.276033	0	0.498	0.828	0.052	0	0	0	0	0	0
3040	STM3142		putative ferrichrome-binding periplasmic protein	-0.92138	-0.1648	-0.81384	-0.0775879	-0.121194	-0.92667	-0.0894726	0	0.536	0.177	0.089	0	0	0	0	0	0
1940	STM1995	ompS1	putative porin	-0.92164	-0.16613	-0.8268	-0.190243	-0.178186	-0.9579	-0.223534	0	0.504	0.643	0	1	0	0	0	0	1
3335	STM3449	yheL	putative oxidation of intracellular sulfur	-0.92166	-0.166232	-0.91186	-0.929626	-0.547929	-1.03387	-0.54965	0	0.53	0.684	0	0	0	0	0	0	0
3582	STM3701	secB	molecular chaperone in protein export	-0.92167	-0.166283	-0.80893	-0.0349077	-0.100595	-0.92682	-0.0901165	0	0.512	0.968	0.155	0	0	0	0	0	0
3641	STM3761	slsA	putative inner membrane protein	-0.9217	-0.166436	-0.85384	-0.425288	-0.295862	-0.97684	-0.304837	0	0.524	0.416	0.186	0	0	0	0	1	1
2420	STM2492		putative Glycerate kinase	-0.92189	-0.167408	-0.805	-0.000746223	-0.0840769	-0.93141	-0.10982	0	0.586	0.487	0	0	0	0	0	0	0
2686	STM2775	iroD	Similar to enterochelin esterase of E. coli (Fes)	-0.92195	-0.167714	-0.75185	0.46126	0.146773	-0.915	-0.0393767	0	0.621	0.278	0.114	0	0	0	0	0	0
2626	STM2714		Fels-2 prophage: similar to lysis protein (lysB) in phage P2	-0.92198	-0.167868	-0.69253	0.976899	0.404515	-0.87337	0.139328	0	0.61	0	0.246	0	0	0	0	0	0
468	STM0478	aefA	putative small-conductance mechanosensitive channel	-0.92206	-0.168277	-0.77712	0.241601	0.0366619	-0.92835	-0.0966843	0	0.526	0.891	0.09	0	0	0	0	0	0
2391	STM2462	eutJ	paral putative heatshock protein (Hsp70)	-0.92232	-0.169606	-0.73533	0.60486	0.217627	-0.89623	0.0411972	0	0.614	0.889	0.168	0	0	0	0	0	0
2477	STM2549	asrB	anaerobic sulfide reductase	-0.92232	-0.169606	-0.77363	0.271937	0.0511657	-0.893	0.0550626	0	0.556	0.202	0.21	0	0	0	0	0	0
2981	STM3082		putative zinc-binding dehydrogenase	-0.92232	-0.169606	-0.88496	-0.695798	-0.432702	-0.98608	-0.344502	0	0.518	0.547	0.254	0	0	0	0	0	0
956	STM0986	ycaQ	putative cytoplasmic protein	-0.92248	-0.170424	-0.79833	0.0572327	-0.0565955	-0.95276	-0.201469	0	0.554	0.771	0	0	0	0	0	0	0
713	STM0733	sdhD	succinate dehydrogenase, hydrophobic subunit	-0.92259	-0.170986	-0.83677	-0.276907	-0.223946	-0.95334	-0.203959	0	0.507	0.948	0.087	0	0	0	0	0	0
1241	STM1280	yeaL	putative inner membrane protein	-0.92277	-0.171906	-0.77515	0.258725	0.0434092	-0.93736	-0.135362	0	0.572	0.918	0	1	0	0	0	0	1
4382	STM4549		putative cytoplasmic protein	-0.92299	-0.173031	-0.87675	-0.624433	-0.398732	-0.96389	-0.249247	0	0.526	0.224	0.197	0	0	0	0	0	0
138	STM0138	yacG	putative cytoplasmic protein	-0.92307	-0.17344	-0.76242	0.36938	0.0979701	-0.90637	-0.00233075	0	0.55	0.857	0.302	0	0	0	0	0	0
1875	STM1923	motA	proton conductor component of motor, torque generator	-0.9233	-0.174616	-0.88683	-0.712053	-0.443334	-0.9993	-0.401251	0	0.513	0.936	0	0	0	0	0	0	0
723	STM0743	ybgE	putative inner membrane lipoprotein	-0.92333	-0.174769	-0.81055	-0.0489896	-0.111879	-0.97156	-0.282172	0	0.523	0.86	0.215	0	0	0	0	0	0
803	STM0831	dps	stress response DNA-binding protein; starvation induced resistance to H2O2	-0.92335	-0.174871	-0.93143	-1.09974	-0.637305	-1.04858	-0.612796	0	0.483	0.952	0.156	0	0	1	0	0	1
1580	STM1626	trg	methyl-accepting chemotaxis protein III, ribose and galactose sensor receptor	-0.92339	-0.175076	-0.79727	0.0664468	-0.0543146	-0.92677	-0.0899018	0	0.541	0.765	0.148	0	0	0	0	0	0
667	STM0687	ybfM	putative outer membrane protein	-0.9234	-0.175127	-0.65421	1.30999	0.567434	-0.81434	0.392726	0	0.514	0.912	0.06	0	0	0	0	0	0
606	STM0619	citG	putative modifier of citrate lyase protein	-0.92358	-0.176047	-0.63057	1.51549	0.669719	-0.78784	0.506483	0	0.607	0.755	0.057	0	0	0	0	0	0
3267	STM3375	yhdA	putative diguanylate cyclase	-0.92385	-0.177427	-0.78826	0.144766	-0.0163307	-0.93242	-0.114156	0	0.534	0.844	0	0	0	0	0	0	0
1970	STM2031	cbiE	synthesis of vitamin B12 adenosyl cobalamide precursor	-0.92388	-0.177581	-0.8537	-0.424071	-0.300826	-0.96547	-0.256029	0	0.579	0.209	0.169	0	0	0	0	0	0
2457	STM2529		putative anaerobic dimethylsulfoxide reductase	-0.92401	-0.178245	-0.8205	-0.13548	-0.156863	-0.94853	-0.183311	0	0.541	0.517	0.124	0	0	0	0	0	0
2757	STM2852	hycB	hydrogenase-3, iron-sulfur subunit (part of FHL complex)	-0.92455	-0.181006	-0.65872	1.27079	0.544893	-0.80529	0.431575	0	0.579	0.96	0.149	0	0	0	0	0	0
1050	STM1081		putative outer membrane protein	-0.92458	-0.181159	-0.76882	0.313748	0.0662944	-0.89192	0.0596988	0	0.547	0.599	0.203	0	0	0	0	0	0
681	STM0701	speF	ornithine decarboxylase isozyme, inducible	-0.92459	-0.181211	-0.76616	0.33687	0.0778299	-0.89844	0.0317104	0	0.539	0.917	0	0	0	0	0	0	0
[truncated: 2,271 more rows]

## Sheet: P. syringae
Source: Pseudomonas syringae phaseolicola 1448a (NC_005773, NC_007275)
BioID	ID	Name	Description	SIEVE score	SIEVE zscore	Class
160	PSPPH_1296	hopX1	type III effector HopX1	-0.434526	2.95674	1
4022	PSPPH_4271	-	hypothetical protein	-0.43674	2.93976	0
5017	PSPPH_A0129	-	Yersinia/Haemophilus virulence surface antigen family	-0.450722	2.83251	0
3852	PSPPH_4091	-	hypothetical protein	-0.452673	2.81755	0
3022	PSPPH_3211	-	hypothetical protein	-0.458842	2.77023	0
2001	PSPPH_2115	-	hypothetical protein	-0.466294	2.71307	0
4228	PSPPH_4483	-	hypothetical protein	-0.466709	2.70989	0
5076	PSPPH_B0044	-	hypothetical protein	-0.474707	2.64854	0
3047	PSPPH_3236	-	hypothetical protein	-0.479498	2.6118	0
1893	PSPPH_2002	-	calcium-binding protein	-0.479872	2.60893	0
1662	PSPPH_1755	-	hypothetical protein	-0.483531	2.58086	0
732	PSPPH_4326	hopAE1	type III effector HopAE1	-0.48768	2.54904	1
2428	PSPPH_2575	-	hypothetical protein	-0.488065	2.54609	0
735	PSPPH_2351	hopV1	type III effector HopV1	-0.489965	2.53151	1
1626	PSPPH_1717	-	hypothetical protein	-0.490947	2.52398	0
1800	PSPPH_1901	-	hypothetical protein	-0.497562	2.47324	0
749	PSPPH_A0127	hopAB1	type III effector HopAB1	-0.498	2.46988	1
2700	PSPPH_2864	-	hypothetical protein	-0.499738	2.45655	0
5034	PSPPH_A0149	-	hypothetical protein	-0.499739	2.45655	0
2702	PSPPH_2866	-	hypothetical protein	-0.500985	2.44699	0
2161	PSPPH_2288	-	ISPsy19, transposase truncated	-0.501845	2.44039	0
3474	PSPPH_3687	-	hypothetical protein	-0.503659	2.42648	0
1017	PSPPH_1295	hrpK1	type III effector HrpK1	-0.504718	2.41836	1
1031	PSPPH_1082	-	hypothetical protein	-0.504865	2.41723	0
3051	PSPPH_3240	-	hypothetical protein	-0.505488	2.41245	0
513	PSPPH_0529	-	hypothetical protein	-0.509067	2.385	0
1201	PSPPH_A0056	hopAV1	type III effector HopAV1	-0.511328	2.36766	1
4682	PSPPH_4972	-	hypothetical protein	-0.512436	2.35916	0
4936	PSPPH_A0018	-	hypothetical protein	-0.513146	2.35371	0
5092	PSPPH_B0060	-	transcriptional regulator, GntR family	-0.51379	2.34877	0
1742	PSPPH_1838	-	hypothetical protein	-0.515096	2.33876	0
237	PSPPH_0250	-	hypothetical protein	-0.515152	2.33833	0
4383	PSPPH_4649	-	hypothetical protein	-0.515524	2.33547	0
1204	PSPPH_0171	hopR1	type III effector HopR1	-0.516464	2.32826	1
631	PSPPH_0651	-	prophage PSPPH01, putative transcriptional regulator	-0.51677	2.32592	0
4410	PSPPH_4676	-	hypothetical protein	-0.516977	2.32433	0
2561	PSPPH_2714	-	hypothetical protein	-0.51778	2.31817	0
1160	PSPPH_1217	-	hypothetical protein	-0.519091	2.30811	0
2009	PSPPH_2123	-	hypothetical protein	-0.520562	2.29683	0
1208	PSPPH_1443	hopAF1	type III effector HopAF1	-0.521602	2.28885	1
2427	PSPPH_2574	-	hypothetical protein	-0.522999	2.27814	0
4986	PSPPH_A0092	-	hypothetical protein	-0.523302	2.27581	0
4783	PSPPH_5075	-	hypothetical protein	-0.523358	2.27539	0
2382	PSPPH_2525	-	hypothetical protein	-0.523735	2.27249	0
597	PSPPH_0616	-	hypothetical protein	-0.524167	2.26918	0
2701	PSPPH_2865	-	hypothetical protein	-0.524458	2.26695	0
4161	PSPPH_4416	-	sensory box histidine kinase	-0.524466	2.26689	0
2178	PSPPH_2307	-	hypothetical protein	-0.524837	2.26404	0
1168	PSPPH_1225	-	hypothetical protein	-0.524909	2.26349	0
4213	PSPPH_4468	-	hypothetical protein	-0.524922	2.26339	0
3367	PSPPH_3571	-	hypothetical protein	-0.526082	2.25449	0
2032	PSPPH_2147	-	hypothetical protein	-0.527697	2.2421	0
4985	PSPPH_A0091	-	hypothetical protein	-0.528052	2.23938	0
3149	PSPPH_3341	-	VOMI family protein	-0.528604	2.23515	0
1271	PSPPH_1337	-	hypothetical protein	-0.528735	2.23414	0
3635	PSPPH_3855	-	hypothetical protein	-0.530133	2.22342	0
1209	PSPPH_0767	hopG1	type III effector HopG1	-0.530642	2.21952	1
4669	PSPPH_4958	-	hypothetical protein	-0.530959	2.21708	0
4287	PSPPH_4543	-	hypothetical protein	-0.531329	2.21425	0
2823	PSPPH_2992	-	hypothetical protein	-0.53179	2.21071	0
3439	PSPPH_3652	-	hypothetical protein	-0.532116	2.20821	0
4956	PSPPH_A0043	-	hypothetical protein	-0.532149	2.20796	0
4441	PSPPH_4711	-	hypothetical protein	-0.532233	2.20731	0
4934	PSPPH_A0016	-	hypothetical protein	-0.532278	2.20697	0
3428	PSPPH_3641	-	hypothetical protein	-0.532361	2.20633	0
3125	PSPPH_3315	-	hypothetical protein	-0.533538	2.1973	0
3507	PSPPH_3720	-	hypothetical protein	-0.533731	2.19582	0
1722	PSPPH_1817	-	hypothetical protein	-0.533824	2.19511	0
1327	PSPPH_1395	-	hypothetical protein	-0.535254	2.18414	0
2373	PSPPH_2516	-	hypothetical protein	-0.535689	2.1808	0
5015	PSPPH_A0126	-	hypothetical protein	-0.537834	2.16435	0
4121	PSPPH_4376	-	hypothetical protein	-0.537943	2.16352	0
2250	PSPPH_2386	-	hypothetical protein	-0.537964	2.16336	0
1233	PSPPH_1297	-	serine-aspartate repeat family protein	-0.5384	2.16001	0
4148	PSPPH_4403	-	hypothetical protein	-0.539177	2.15405	0
280	PSPPH_0293	-	tonB domain protein	-0.539814	2.14917	0
2703	PSPPH_2867	-	hypothetical protein	-0.540362	2.14496	0
4697	PSPPH_4987	-	hypothetical protein	-0.540501	2.1439	0
2680	PSPPH_2844	-	hypothetical protein	-0.54051	2.14383	0
760	PSPPH_0797	-	hypothetical protein	-0.540791	2.14167	0
3088	PSPPH_3277	-	hypothetical protein	-0.541106	2.13926	0
2030	PSPPH_2145	-	hypothetical protein	-0.54115	2.13892	0
4293	PSPPH_4549	-	hypothetical protein	-0.541302	2.13775	0
2552	PSPPH_2705	-	hypothetical protein	-0.541816	2.13381	0
1231	PSPPH_A0087	avrRps4	type III effector AvrRps4	-0.542184	2.13099	1
2343	PSPPH_2485	-	HypX	-0.543043	2.1244	0
1376	PSPPH_1445	-	hypothetical protein	-0.543375	2.12185	0
5003	PSPPH_A0111	-	hypothetical protein	-0.54441	2.11391	0
3249	PSPPH_3444	-	hypothetical protein	-0.5448	2.11092	0
564	PSPPH_0582	-	hypothetical protein	-0.545566	2.10505	0
1604	PSPPH_1695	-	lipoprotein, putative	-0.545642	2.10446	0
3925	PSPPH_4167	-	hypothetical protein	-0.545767	2.10351	0
225	PSPPH_0238	-	hypothetical protein	-0.545893	2.10254	0
4660	PSPPH_4948	-	hypothetical protein	-0.545954	2.10207	0
1162	PSPPH_1219	-	hypothetical protein	-0.545962	2.10201	0
587	PSPPH_0605	-	O-antigen ABC transporter, permease protein, putative	-0.54599	2.10179	0
3691	PSPPH_3914	-	hypothetical protein	-0.546236	2.09991	0
2443	PSPPH_2591	-	hypothetical protein	-0.547376	2.09116	0
596	PSPPH_0615	-	hypothetical protein	-0.547469	2.09045	0
1232	PSPPH_1424	hopAK1	type III effector HopAK1	-0.547578	2.08961	1
1355	PSPPH_A0120	avrB2	type III effector AvrB2	-0.547602	2.08943	1
3985	PSPPH_4231	-	hypothetical protein	-0.547706	2.08863	0
1374	PSPPH_4736	hopAS1	type III effector HopAS1	-0.547741	2.08836	1
4703	PSPPH_4993	-	hypothetical protein	-0.547766	2.08817	0
2263	PSPPH_2399	-	hypothetical protein	-0.547926	2.08695	0
4211	PSPPH_4466	-	hypothetical protein	-0.548176	2.08503	0
883	PSPPH_0929	-	hypothetical protein	-0.54836	2.08362	0
4996	PSPPH_A0104	-	hypothetical protein	-0.548507	2.08249	0
1838	PSPPH_1940	-	hypothetical protein	-0.548776	2.08043	0
2689	PSPPH_2853	-	hypothetical protein	-0.548834	2.07998	0
3695	PSPPH_3918	-	hypothetical protein	-0.549988	2.07113	0
5056	PSPPH_B0024	-	hypothetical protein	-0.550319	2.06859	0
755	PSPPH_0792	-	hypothetical protein	-0.550331	2.0685	0
2814	PSPPH_2982	-	hypothetical protein	-0.550565	2.0667	0
3329	PSPPH_3533	-	hypothetical protein	-0.551064	2.06288	0
578	PSPPH_0596	-	hypothetical protein	-0.551089	2.06268	0
1416	PSPPH_1487	-	hypothetical protein	-0.551257	2.0614	0
4025	PSPPH_4274	-	F-box domain protein	-0.55153	2.0593	0
4382	PSPPH_4648	-	Protein of unknown function (DUF726) family	-0.552516	2.05174	0
4957	PSPPH_A0044	-	ISPsy16, transposase, truncated	-0.552601	2.05109	0
2712	PSPPH_2877	-	hypothetical protein	-0.552802	2.04955	0
1368	PSPPH_1437	-	hypothetical protein	-0.552995	2.04807	0
2252	PSPPH_2388	-	hypothetical protein	-0.553396	2.04499	0
1601	PSPPH_1692	-	hypothetical protein	-0.553577	2.0436	0
4409	PSPPH_4675	-	WavE lipopolysaccharide synthesis superfamily	-0.554015	2.04024	0
3663	PSPPH_3885	-	hypothetical protein	-0.554088	2.03968	0
5013	PSPPH_A0123	-	hypothetical protein	-0.554191	2.03889	0
1060	PSPPH_1113	algG	alginate biosynthesis protein AlgG	-0.554273	2.03826	0
1006	PSPPH_1057	-	pressure-regulated protein	-0.554607	2.0357	0
3824	PSPPH_4059	-	hypothetical protein	-0.555454	2.0292	0
3301	PSPPH_3502	-	hypothetical protein	-0.555667	2.02757	0
4941	PSPPH_A0025	-	hypothetical protein	-0.555747	2.02696	0
2216	PSPPH_A0009	hopW1-1	type III effector HopW1-1, truncated	-0.555946	2.02543	1
4929	PSPPH_A0009	hopW1-1	type III effector HopW1-1, truncated	-0.555946	2.02543	0
2662	PSPPH_2825	-	hypothetical protein	-0.556105	2.02421	0
2262	PSPPH_2398	-	hypothetical protein	-0.556121	2.02409	0
4200	PSPPH_4455	-	hypothetical protein	-0.556622	2.02025	0
4940	PSPPH_A0023	-	hypothetical protein	-0.556954	2.0177	0
593	PSPPH_0612	-	hypothetical protein	-0.557194	2.01586	0
3632	PSPPH_3852	-	hypothetical protein	-0.557319	2.0149	0
478	PSPPH_0494	-	hypothetical protein	-0.557521	2.01335	0
1393	PSPPH_1463	-	hypothetical protein	-0.557568	2.01299	0
3283	PSPPH_3480	-	hypothetical protein	-0.5576	2.01274	0
3638	PSPPH_3858	-	hypothetical protein	-0.557709	2.01191	0
1406	PSPPH_1476	-	hypothetical protein	-0.557768	2.01146	0
508	PSPPH_0524	-	hypothetical protein	-0.557888	2.01054	0
4733	PSPPH_5023	-	hypothetical protein	-0.558156	2.00848	0
2202	PSPPH_2334	-	hypothetical protein	-0.559197	2.0005	0
4065	PSPPH_4316	-	hypothetical protein	-0.559247	2.00011	0
5035	PSPPH_B0002	-	Replicase family family	-0.559482	1.99831	0
4426	PSPPH_4695	-	hypothetical protein	-0.559711	1.99655	0
2132	PSPPH_2257	-	hypothetical protein	-0.559784	1.99599	0
4286	PSPPH_4542	-	hypothetical protein	-0.559925	1.99491	0
2864	PSPPH_1273	hrpZ1	type III helper protein HrpZ1	-0.560104	1.99354	1
778	PSPPH_0815	-	calcium binding hemolysin protein, putative	-0.560544	1.99016	0
842	PSPPH_0885	-	hypothetical protein	-0.56068	1.98912	0
4724	PSPPH_5014	-	hypothetical protein	-0.560682	1.98911	0
2358	PSPPH_2500	-	hypothetical protein	-0.56069	1.98904	0
158	PSPPH_0166	-	hypothetical protein	-0.560795	1.98824	0
3531	PSPPH_3746	-	hypothetical protein	-0.560817	1.98807	0
2372	PSPPH_2515	-	hypothetical protein	-0.56094	1.98713	0
3299	PSPPH_A0012	hopQ1	type III effector HopQ1	-0.56132	1.98421	1
5085	PSPPH_B0053	-	hypothetical protein	-0.56153	1.9826	0
4023	PSPPH_4272	-	hypothetical protein	-0.561641	1.98175	0
634	PSPPH_0654	-	hypothetical protein	-0.562105	1.97819	0
1224	PSPPH_1288	hrpP	type III secretion protein HrpP	-0.56216	1.97777	0
4074	PSPPH_1272	hrpA2	type III helper protein HrpA2	-0.562287	1.97679	1
3378	PSPPH_3584	-	hypothetical protein	-0.562299	1.9767	0
2786	PSPPH_2953	-	hypothetical protein	-0.562343	1.97637	0
4111	PSPPH_A0031	hopAU1	type III effector HopAU1	-0.562715	1.97351	1
426	PSPPH_0441	madM	malonate transporter, MadM subunit	-0.563067	1.97081	0
2095	PSPPH_2218	-	hypothetical protein	-0.563241	1.96948	0
2632	PSPPH_2789	-	hypothetical protein	-0.563689	1.96604	0
3369	PSPPH_3573	-	hypothetical protein	-0.563693	1.96601	0
1904	PSPPH_2016	-	K+-transporting ATPase, F subunit	-0.563751	1.96557	0
925	PSPPH_0973	-	hypothetical protein	-0.563835	1.96492	0
1329	PSPPH_1397	-	hypothetical protein	-0.564449	1.96021	0
1605	PSPPH_1696	-	hypothetical protein	-0.564507	1.95977	0
1087	PSPPH_1142	-	hypothetical protein	-0.564778	1.95769	0
3345	PSPPH_3549	-	hypothetical protein	-0.565096	1.95525	0
922	PSPPH_0970	-	O-methyltransferase I	-0.565403	1.95289	0
4464	PSPPH_3028	avrB4-1	type III effector AvrB4-1	-0.56541	1.95284	1
4044	PSPPH_4295	-	site-specific recombinase, phage integrase family	-0.565635	1.95112	0
2637	PSPPH_2795	-	hypothetical protein	-0.565761	1.95015	0
5079	PSPPH_B0047	-	hypothetical protein	-0.566053	1.94791	0
728	PSPPH_0760	-	type IV pilus protein PilV2, putative, truncated	-0.566117	1.94742	0
4157	PSPPH_4412	-	hypothetical protein	-0.56655	1.9441	0
4258	PSPPH_4513	-	hypothetical protein	-0.56678	1.94233	0
2367	PSPPH_2509	-	hypothetical protein	-0.567128	1.93966	0
661	PSPPH_0682	-	Protein of unknown function (DUF805) family	-0.567173	1.93932	0
3475	PSPPH_3688	-	hypothetical protein	-0.567314	1.93824	0
4411	PSPPH_4677	-	hypothetical protein	-0.56757	1.93627	0
4045	PSPPH_4296	-	hypothetical protein	-0.567717	1.93515	0
4736	PSPPH_5026	-	hypothetical protein	-0.56773	1.93505	0
5082	PSPPH_B0050	-	relaxase, putative	-0.568344	1.93034	0
3115	PSPPH_3305	-	lipoprotein, putative	-0.568672	1.92782	0
1382	PSPPH_1452	-	hypothetical protein	-0.568956	1.92564	0
3802	PSPPH_4033	-	hypothetical protein	-0.569456	1.92181	0
1628	PSPPH_1719	-	hypothetical protein	-0.569768	1.91941	0
2076	PSPPH_2198	-	hypothetical protein	-0.570034	1.91737	0
4927	PSPPH_A0007	-	carbon storage regulator related protein	-0.570509	1.91373	0
4927	PSPPH_A0073	-	carbon storage regulator related protein	-0.570509	1.91373	0
2562	PSPPH_2715	-	hypothetical protein	-0.570615	1.91292	0
4944	PSPPH_A0028	-	hypothetical protein	-0.57071	1.91219	0
4929	PSPPH_0784	avrB4-2	type III effector AvrB4-2	-0.571517	1.906	1
2069	PSPPH_2190	-	hypothetical protein	-0.57178	1.90398	0
2156	PSPPH_2281	-	hypothetical protein	-0.57182	1.90368	0
1726	PSPPH_1821	-	hypothetical protein	-0.571865	1.90333	0
2131	PSPPH_2256	-	hypothetical protein	-0.572025	1.9021	0
4072	PSPPH_4323	-	hypothetical protein	-0.572217	1.90063	0
5010	PSPPH_A0118	-	IS801, transposase, truncated	-0.572538	1.89817	0
4929	PSPPH_1268	avrE1	type III effector AvrE1	-0.572622	1.89752	1
1202	PSPPH_1265	shcM	type III chaperone protein ShcM	-0.573076	1.89404	0
4871	PSPPH_5169	-	hypothetical protein	-0.573522	1.89062	0
2018	PSPPH_2132	-	hypothetical protein	-0.573567	1.89028	0
3447	PSPPH_3660	-	hypothetical protein	-0.573811	1.8884	0
2563	PSPPH_2716	-	hypothetical protein	-0.573987	1.88705	0
4198	PSPPH_4453	-	hypothetical protein	-0.574009	1.88689	0
4554	PSPPH_4832	-	hypothetical protein	-0.574176	1.8856	0
5012	PSPPH_A0122	hopAW1	type III effector HopAW1	-0.574234	1.88516	0
1174	PSPPH_1232	-	hypothetical protein	-0.574328	1.88444	0
2257	PSPPH_2393	-	Anti-repressor protein	-0.574357	1.88422	0
1270	PSPPH_1335	-	ATP-binding protein	-0.574423	1.88371	0
4869	PSPPH_5167	-	hypothetical protein	-0.574468	1.88337	0
1978	PSPPH_2092	-	hypothetical protein	-0.574649	1.88198	0
3377	PSPPH_3583	-	hypothetical protein	-0.574867	1.8803	0
4848	PSPPH_5146	-	hypothetical protein	-0.574992	1.87935	0
1151	PSPPH_1208	-	hypothetical protein	-0.57559	1.87476	0
4588	PSPPH_4871	-	hypothetical protein	-0.576249	1.8697	0
502	PSPPH_0518	-	hypothetical protein	-0.576339	1.86901	0
4696	PSPPH_4986	-	hypothetical protein	-0.57636	1.86885	0
3375	PSPPH_3580	-	hypothetical protein	-0.576374	1.86875	0
4064	PSPPH_4315	-	hypothetical protein	-0.576582	1.86715	0
1158	PSPPH_1215	-	hypothetical protein	-0.576626	1.86681	0
2029	PSPPH_2144	-	hypothetical protein	-0.576687	1.86635	0
1147	PSPPH_1204	-	hypothetical protein	-0.576963	1.86423	0
2744	PSPPH_2910	-	hypothetical protein	-0.577187	1.86251	0
2475	PSPPH_2624	-	hypothetical protein	-0.577288	1.86174	0
4781	PSPPH_5073	-	hypothetical protein	-0.577358	1.8612	0
2370	PSPPH_2513	-	hypothetical protein	-0.577442	1.86055	0
1055	PSPPH_1108	algF	alginate biosynthesis protein AlgF	-0.577495	1.86015	0
5001	PSPPH_A0109	-	sulfotransferase, putative	-0.577618	1.8592	0
4882	PSPPH_5180	-	hypothetical protein	-0.577914	1.85693	0
1225	PSPPH_1289	hrpO	type III secretion component protein HrpO	-0.578415	1.85309	0
4860	PSPPH_5158	-	hypothetical protein	-0.57851	1.85236	0
303	PSPPH_0318	-	hypothetical protein	-0.579042	1.84828	0
3427	PSPPH_3639	-	ISPsy19, transposase truncated	-0.579064	1.84811	0
4063	PSPPH_4314	-	hypothetical protein	-0.579182	1.84721	0
5014	PSPPH_A0125	-	hypothetical protein	-0.579567	1.84426	0
801	PSPPH_0839	-	tellurium resistance protein, putative	-0.580548	1.83673	0
762	PSPPH_0799	-	hypothetical protein	-0.58074	1.83526	0
141	PSPPH_0148	-	hypothetical protein	-0.580881	1.83418	0
5040	PSPPH_B0007	-	hypothetical protein	-0.580977	1.83344	0
3234	PSPPH_3426	-	hypothetical protein	-0.581111	1.83241	0
5043	PSPPH_B0010	-	hypothetical protein	-0.581236	1.83145	0
635	PSPPH_0655	-	prophage PSPPH01, putative cellulase	-0.581338	1.83067	0
3767	PSPPH_3995	-	hypothetical protein	-0.58144	1.82989	0
129	PSPPH_0135	-	hypothetical protein	-0.581455	1.82977	0
952	PSPPH_1002	-	hypothetical protein	-0.581927	1.82615	0
4930	PSPPH_4366	hopI1	type III effector HopI1	-0.582296	1.82332	1
2218	PSPPH_2352	shcV	type III chaperone protein ShcV	-0.582696	1.82026	0
146	PSPPH_0154	-	hypothetical protein	-0.583056	1.81749	0
672	PSPPH_0698	-	PAAR motif family	-0.583631	1.81308	0
2517	PSPPH_2670	-	hypothetical protein	-0.583712	1.81246	0
2691	PSPPH_2855	-	hypothetical protein	-0.583733	1.8123	0
3245	PSPPH_3437	-	BNR/Asp-box repeat protein	-0.583772	1.812	0
4954	PSPPH_A0040	-	hypothetical protein	-0.583803	1.81176	0
2035	PSPPH_2150	-	hypothetical protein	-0.583824	1.8116	0
740	PSPPH_0772	-	hypothetical protein	-0.584347	1.80759	0
4693	PSPPH_4983	-	prophage PSPPH06, putative tail tape meausure domain protein	-0.584388	1.80728	0
1779	PSPPH_1876	-	hypothetical protein	-0.584647	1.80529	0
5029	PSPPH_A0144	-	conjugal transfer protein	-0.584719	1.80474	0
2255	PSPPH_2391	-	hypothetical protein	-0.584763	1.8044	0
4201	PSPPH_4456	-	hypothetical protein	-0.584813	1.80402	0
4975	PSPPH_A0066	-	hypothetical protein	-0.584883	1.80348	0
3697	PSPPH_3920	-	hypothetical protein	-0.585488	1.79884	0
2264	PSPPH_2400	-	hypothetical protein	-0.585569	1.79822	0
1715	PSPPH_1810	-	hypothetical protein	-0.585579	1.79814	0
2329	PSPPH_2470	-	hypothetical protein	-0.585821	1.79629	0
2258	PSPPH_2394	-	prophage PSPPH04, tail fiber domain protein	-0.586249	1.793	0
1014	PSPPH_1065	-	hypothetical protein	-0.586372	1.79206	0
3143	PSPPH_3335	-	hypothetical protein	-0.586732	1.7893	0
4659	PSPPH_4947	-	hypothetical protein	-0.587078	1.78664	0
1869	PSPPH_1975	-	hypothetical protein	-0.587311	1.78486	0
1739	PSPPH_1835	-	hypothetical protein	-0.587586	1.78275	0
131	PSPPH_0138	-	hypothetical protein	-0.587997	1.7796	0
1700	PSPPH_1794	-	hypothetical protein	-0.588069	1.77904	0
3398	PSPPH_3605	-	hypothetical protein	-0.588097	1.77883	0
720	PSPPH_0751	-	hypothetical protein	-0.588101	1.7788	0
588	PSPPH_0607	-	hypothetical protein	-0.588223	1.77786	0
387	PSPPH_0402	-	hypothetical protein	-0.588228	1.77782	0
4685	PSPPH_4975	-	hypothetical protein	-0.588531	1.7755	0
5002	PSPPH_A0110	-	hypothetical protein	-0.588572	1.77519	0
2658	PSPPH_2820	-	hypothetical protein	-0.589219	1.77022	0
4932	PSPPH_3036	hopAH2	type III effector HopAH2	-0.58922	1.77022	1
2211	PSPPH_2343	-	hypothetical protein	-0.589386	1.76894	0
2553	PSPPH_2706	-	hypothetical protein	-0.589438	1.76854	0
4928	PSPPH_A0074	-	hypothetical protein	-0.590276	1.76212	0
4928	PSPPH_A0008	-	hypothetical protein	-0.590276	1.76212	0
2641	PSPPH_2801	-	hypothetical protein	-0.590348	1.76156	0
3248	PSPPH_3443	-	hypothetical protein	-0.590562	1.75992	0
4066	PSPPH_4317	-	hypothetical protein	-0.590848	1.75773	0
2682	PSPPH_2846	-	hypothetical protein	-0.591218	1.75489	0
1023	PSPPH_1074	-	hypothetical protein	-0.591273	1.75447	0
917	PSPPH_0965	-	hypothetical protein	-0.591462	1.75302	0
2586	PSPPH_2741	-	hypothetical protein	-0.591588	1.75205	0
2953	PSPPH_3137	-	hypothetical protein	-0.592081	1.74827	0
1173	PSPPH_1231	-	hypothetical protein	-0.592263	1.74688	0
1108	PSPPH_1164	-	hypothetical protein	-0.592424	1.74564	0
4699	PSPPH_4989	-	ISPsy19, transposase truncated	-0.592588	1.74438	0
1064	PSPPH_1117	-	alginate biosynthesis protein Alg8	-0.592893	1.74204	0
384	PSPPH_0399	-	lipoprotein, putative	-0.593125	1.74026	0
4650	PSPPH_4936	-	hypothetical protein	-0.593223	1.73951	0
2389	PSPPH_2533	-	hypothetical protein	-0.5933	1.73892	0
1396	PSPPH_1466	-	hypothetical protein	-0.59375	1.73547	0
590	PSPPH_0609	-	hypothetical protein	-0.594295	1.73129	0
831	PSPPH_0869	-	hypothetical protein	-0.594674	1.72838	0
4270	PSPPH_4525	-	hypothetical protein	-0.594755	1.72776	0
4233	PSPPH_4488	-	hypothetical protein	-0.595309	1.72351	0
976	PSPPH_1026	-	hypothetical protein	-0.595498	1.72206	0
4763	PSPPH_5055	-	hypothetical protein	-0.595603	1.72126	0
2515	PSPPH_2668	-	UvrD/REP helicase family protein	-0.595679	1.72067	0
1438	PSPPH_1510	-	Polysaccharide lyase family 8, super-sandwich domain protein	-0.595726	1.72031	0
1354	PSPPH_1423	-	hypothetical protein	-0.595807	1.71969	0
1148	PSPPH_1205	-	hypothetical protein	-0.595922	1.71881	0
3566	PSPPH_3784	-	lipoprotein, putative	-0.596003	1.71819	0
3746	PSPPH_3970	-	hypothetical protein	-0.596146	1.71709	0
2631	PSPPH_2788	-	zona occludens toxin, putative	-0.596217	1.71655	0
4273	PSPPH_4528	-	hypothetical protein	-0.596538	1.71409	0
930	PSPPH_0978	-	hypothetical protein	-0.596543	1.71405	0
1776	PSPPH_1873	-	hypothetical protein	-0.596572	1.71382	0
3644	PSPPH_3864	-	hypothetical protein	-0.596593	1.71366	0
3696	PSPPH_3919	-	hypothetical protein	-0.596772	1.71229	0
3333	PSPPH_3537	-	hypothetical protein	-0.596773	1.71228	0
2785	PSPPH_2952	-	senescence marker protein-30 family protein	-0.596816	1.71195	0
979	PSPPH_1029	-	hypothetical protein	-0.596851	1.71168	0
923	PSPPH_0971	-	hypothetical protein	-0.597058	1.7101	0
3779	PSPPH_4009	-	hypothetical protein	-0.597188	1.7091	0
281	PSPPH_0294	-	hypothetical protein	-0.597409	1.7074	0
163	PSPPH_0174	-	hypothetical protein	-0.597441	1.70716	0
2396	PSPPH_2540	-	hypothetical protein	-0.597485	1.70682	0
4953	PSPPH_A0039	-	hypothetical protein	-0.597499	1.70671	0
3651	PSPPH_3871	-	hypothetical protein	-0.597626	1.70574	0
1530	PSPPH_1612	-	hypothetical protein	-0.597736	1.7049	0
4706	PSPPH_4996	-	hypothetical protein	-0.597785	1.70452	0
5008	PSPPH_A0116	-	ISPsy16, transposase, truncated	-0.598126	1.70191	0
2033	PSPPH_2148	-	hypothetical protein	-0.598201	1.70133	0
3029	PSPPH_3218	-	hypothetical protein	-0.598314	1.70046	0
4689	PSPPH_4979	-	prophage PSPPH06, putative reverse transcriptase/maturase	-0.598537	1.69875	0
148	PSPPH_0156	-	hypothetical protein	-0.598759	1.69705	0
4796	PSPPH_5089	-	hypothetical protein	-0.598772	1.69695	0
931	PSPPH_0979	-	hypothetical protein	-0.59881	1.69666	0
3023	PSPPH_3212	-	hypothetical protein	-0.598848	1.69637	0
1417	PSPPH_1488	-	hypothetical protein	-0.598994	1.69525	0
734	PSPPH_0765	-	hypothetical protein	-0.599257	1.69323	0
4055	PSPPH_4306	-	hypothetical protein	-0.599272	1.69312	0
3211	PSPPH_3403	-	hypothetical protein	-0.599365	1.6924	0
4031	PSPPH_4281	-	hypothetical protein	-0.599928	1.68808	0
5046	PSPPH_B0013	-	hypothetical protein	-0.600093	1.68682	0
2576	PSPPH_2731	-	hypothetical protein	-0.600809	1.68133	0
2821	PSPPH_2990	-	phytase domain protein	-0.600852	1.681	0
1898	PSPPH_2009	-	hypothetical protein	-0.600974	1.68006	0
5072	PSPPH_B0040	-	hypothetical protein	-0.60119	1.6784	0
1453	PSPPH_1525	-	hypothetical protein	-0.601278	1.67773	0
2254	PSPPH_2390	-	hypothetical protein	-0.601385	1.67691	0
1989	PSPPH_2103	-	hypothetical protein	-0.601638	1.67497	0
900	PSPPH_0947	-	hypothetical protein	-0.601696	1.67452	0
821	PSPPH_0859	-	hypothetical protein	-0.60172	1.67434	0
161	PSPPH_5226	-	HrpL-regulated protein	-0.601746	1.67414	0
2379	PSPPH_2522	-	hypothetical protein	-0.601988	1.67228	0
3812	PSPPH_4047	-	hypothetical protein	-0.602118	1.67129	0
3150	PSPPH_3342	-	prevent-host-death family protein	-0.602275	1.67008	0
1602	PSPPH_1693	-	hypothetical protein	-0.602536	1.66808	0
5078	PSPPH_B0046	-	TraL	-0.602826	1.66586	0
4191	PSPPH_4446	-	hypothetical protein	-0.603117	1.66362	0
3975	PSPPH_4220	-	hypothetical protein	-0.603217	1.66286	0
594	PSPPH_0613	-	hypothetical protein	-0.603276	1.6624	0
2259	PSPPH_2395	-	hypothetical protein	-0.603468	1.66093	0
3353	PSPPH_3557	-	hypothetical protein	-0.603584	1.66004	0
2212	PSPPH_2344	-	lipoprotein, putative	-0.603638	1.65963	0
638	PSPPH_0658	-	hypothetical protein	-0.603644	1.65958	0
1536	PSPPH_1620	-	hypothetical protein	-0.60377	1.65861	0
5090	PSPPH_B0058	-	site-specific recombinase, phage integrase family	-0.604155	1.65566	0
748	PSPPH_0783	-	hypothetical protein	-0.604255	1.65489	0
2040	PSPPH_2155	-	hypothetical protein	-0.604279	1.65471	0
875	PSPPH_0920	-	S-type pyocin family protein	-0.604431	1.65355	0
4786	PSPPH_5079	-	hypothetical protein	-0.604643	1.65192	0
2210	PSPPH_2342	-	hypothetical protein	-0.604876	1.65013	0
1928	PSPPH_2042	oprI	outer membrane lipoprotein OprI	-0.604991	1.64925	0
4686	PSPPH_4976	-	hypothetical protein	-0.605014	1.64907	0
5018	PSPPH_A0130	-	hypothetical protein	-0.605361	1.64641	0
643	PSPPH_0664	-	hypothetical protein	-0.605542	1.64502	0
130	PSPPH_0136	-	hypothetical protein	-0.605974	1.64171	0
3202	PSPPH_3394	-	glycosyl transferase, group 2 family protein	-0.60619	1.64005	0
4225	PSPPH_4480	-	hypothetical protein	-0.606232	1.63973	0
58	PSPPH_0062	-	hypothetical protein	-0.606286	1.63932	0
4963	PSPPH_A0051	-	hypothetical protein	-0.606426	1.63824	0
4445	PSPPH_4716	-	hypothetical protein	-0.606869	1.63485	0
1897	PSPPH_2007	-	hypothetical protein	-0.606912	1.63452	0
3698	PSPPH_3921	-	hypothetical protein	-0.606914	1.6345	0
3250	PSPPH_3445	-	hypothetical protein	-0.607437	1.63049	0
4947	PSPPH_1264	hrpW1	type III helper protein HrpW1	-0.607662	1.62876	1
4958	PSPPH_A0045	-	hypothetical protein	-0.607841	1.62739	0
1470	PSPPH_1544	-	gas vesicle protein, putative	-0.608015	1.62606	0
5041	PSPPH_B0008	-	hypothetical protein	-0.608067	1.62566	0
3996	PSPPH_4243	-	hypothetical protein	-0.608386	1.62321	0
2390	PSPPH_2534	-	type III secretion component, putative	-0.608552	1.62194	0
4949	PSPPH_A0033	-	trbA protein, truncated	-0.60869	1.62088	0
330	PSPPH_0345	-	RNA polymerase sigma-70 family protein	-0.608715	1.62069	0
4257	PSPPH_4512	-	hypothetical protein	-0.609062	1.61802	0
2340	PSPPH_2481	glf	UDP-galactopyranose mutase	-0.609607	1.61384	0
844	PSPPH_0887	-	hypothetical protein	-0.609705	1.61309	0
4897	PSPPH_5196	-	hypothetical protein	-0.609958	1.61115	0
3646	PSPPH_3866	-	hypothetical protein	-0.610109	1.60999	0
208	PSPPH_0221	-	hypothetical protein	-0.610381	1.60791	0
2159	PSPPH_2285	-	hypothetical protein	-0.610394	1.60781	0
4922	PSPPH_A0001	-	hypothetical protein	-0.610467	1.60725	0
4922	PSPPH_B0001	-	hypothetical protein	-0.610467	1.60725	0
4466	PSPPH_4738	-	hypothetical protein	-0.610628	1.60601	0
2565	PSPPH_2718	-	hypothetical protein	-0.610667	1.60571	0
2007	PSPPH_2121	-	hypothetical protein	-0.610719	1.60532	0
4657	PSPPH_4944	-	DnaJ domain protein	-0.61083	1.60446	0
1911	PSPPH_2023	-	lipoprotein, putative	-0.610864	1.6042	0
3461	PSPPH_3674	-	hypothetical protein	-0.610896	1.60396	0
2805	PSPPH_2972	-	hypothetical protein	-0.610924	1.60374	0
2849	PSPPH_3019	-	hypothetical protein	-0.610964	1.60344	0
4967	PSPPH_3498	hopF3	type III effector HopF3	-0.611112	1.6023	1
2224	PSPPH_2359	-	hypothetical protein	-0.611152	1.60199	0
1731	PSPPH_1826	-	hypothetical protein	-0.611252	1.60123	0
423	PSPPH_0438	-	Phosphoribosyl-dephospho-CoA transferase (Holo-ACPsynthase)	-0.611427	1.59988	0
4434	PSPPH_4704	pqqA	coenzyme PQQ biosynthesis protein A	-0.61164	1.59825	0
1388	PSPPH_1458	-	hypothetical protein	-0.611646	1.59821	0
1397	PSPPH_1467	-	hypothetical protein	-0.611671	1.59801	0
393	PSPPH_0408	-	hypothetical protein	-0.611772	1.59724	0
1799	PSPPH_1900	-	GtrC, putative	-0.611864	1.59653	0
1307	PSPPH_1375	-	hypothetical protein	-0.611949	1.59588	0
4419	PSPPH_4686	-	ATP/GTP-binding protein	-0.61212	1.59457	0
4684	PSPPH_4974	-	hypothetical protein	-0.612122	1.59455	0
789	PSPPH_0827	-	trypsin domain protein	-0.612532	1.59141	0
157	PSPPH_0165	-	hypothetical protein	-0.612564	1.59116	0
3753	PSPPH_3978	-	hypothetical protein	-0.61277	1.58958	0
4529	PSPPH_4804	-	hypothetical protein	-0.612829	1.58913	0
963	PSPPH_1013	-	hypothetical protein	-0.613349	1.58514	0
171	PSPPH_0184	-	hypothetical protein	-0.613463	1.58427	0
107	PSPPH_0112	-	hypothetical protein	-0.613569	1.58346	0
1741	PSPPH_1837	-	hypothetical protein	-0.613585	1.58333	0
3980	PSPPH_4225	-	hypothetical protein	-0.614137	1.5791	0
3518	PSPPH_3731	-	hypothetical protein	-0.614183	1.57875	0
1502	PSPPH_1580	-	hypothetical protein	-0.614221	1.57845	0
49	PSPPH_0053	-	hypothetical protein	-0.614699	1.57479	0
2287	PSPPH_2424	-	hypothetical protein	-0.615172	1.57116	0
108	PSPPH_A0100	-	ISPsy19, transposase	-0.615272	1.57039	0
108	PSPPH_1600	-	ISPsy19, transposase	-0.615272	1.57039	0
108	PSPPH_2815	-	ISPsy19, transposase	-0.615272	1.57039	0
108	PSPPH_3582	-	ISPsy19, transposase	-0.615272	1.57039	0
108	PSPPH_0606	-	ISPsy19, transposase	-0.615272	1.57039	0
108	PSPPH_2730	-	ISPsy19, transposase	-0.615272	1.57039	0
108	PSPPH_2568	-	ISPsy19, transposase	-0.615272	1.57039	0
108	PSPPH_3884	-	ISPsy19, transposase	-0.615272	1.57039	0
108	PSPPH_4685	-	ISPsy19, transposase	-0.615272	1.57039	0
108	PSPPH_3747	-	ISPsy19, transposase	-0.615272	1.57039	0
108	PSPPH_0899	-	ISPsy19, transposase	-0.615272	1.57039	0
108	PSPPH_0113	-	ISPsy19, transposase	-0.615272	1.57039	0
108	PSPPH_0776	-	ISPsy19, transposase	-0.615272	1.57039	0
108	PSPPH_2006	-	ISPsy19, transposase	-0.615272	1.57039	0
108	PSPPH_4275	-	ISPsy19, transposase	-0.615272	1.57039	0
108	PSPPH_0176	-	ISPsy19, transposase	-0.615272	1.57039	0
108	PSPPH_4159	-	ISPsy19, transposase	-0.615272	1.57039	0
108	PSPPH_4285	-	ISPsy19, transposase	-0.615272	1.57039	0
108	PSPPH_1372	-	ISPsy19, transposase	-0.615272	1.57039	0
108	PSPPH_0170	-	ISPsy19, transposase	-0.615272	1.57039	0
108	PSPPH_1878	-	ISPsy19, transposase	-0.615272	1.57039	0
863	PSPPH_0908	-	lipoprotein, putative	-0.615287	1.57028	0
3978	PSPPH_4223	-	hypothetical protein	-0.6153	1.57018	0
315	PSPPH_0330	-	hypothetical protein	-0.61556	1.56818	0
2879	PSPPH_3052	-	hypothetical protein	-0.615664	1.56739	0
2622	PSPPH_2778	-	hypothetical protein	-0.615836	1.56607	0
4070	PSPPH_4321	-	hypothetical protein	-0.615888	1.56567	0
2127	PSPPH_2250	-	hypothetical protein	-0.616077	1.56422	0
4160	PSPPH_4415	-	hypothetical protein	-0.616243	1.56295	0
1496	PSPPH_1574	-	hypothetical protein	-0.616411	1.56166	0
500	PSPPH_0516	-	hypothetical protein	-0.616546	1.56062	0
3744	PSPPH_3968	-	hypothetical protein	-0.616737	1.55916	0
4977	PSPPH_A0068	-	ISPsy19, transposase	-0.616746	1.55909	0
4977	PSPPH_A0081	-	ISPsy19, transposase	-0.616746	1.55909	0
872	PSPPH_2659	-	ISPsy19, transposase	-0.616764	1.55895	0
872	PSPPH_1490	-	ISPsy19, transposase	-0.616764	1.55895	0
872	PSPPH_0917	-	ISPsy19, transposase	-0.616764	1.55895	0
1600	PSPPH_1691	-	hypothetical protein	-0.616897	1.55793	0
2991	PSPPH_3178	-	hypothetical protein	-0.617095	1.55641	0
937	PSPPH_0985	-	hypothetical protein	-0.617109	1.5563	0
1092	PSPPH_1148	-	hypothetical protein	-0.617239	1.55531	0
3500	PSPPH_3713	-	hypothetical protein	-0.617419	1.55393	0
182	PSPPH_0195	-	lipoprotein, putative	-0.617431	1.55383	0
4664	PSPPH_4953	-	prophage PSPPH06, putative tail fiber protein	-0.617591	1.55261	0
2253	PSPPH_2389	-	hypothetical protein	-0.617592	1.5526	0
1217	PSPPH_1281	hrpV	type III negative regulator of hrp expression HrpV	-0.617835	1.55073	0
64	PSPPH_0068	-	hypothetical protein	-0.6179	1.55024	0
4772	PSPPH_5064	-	hypothetical protein	-0.617971	1.54969	0
4931	PSPPH_A0011	-	hypothetical protein	-0.618143	1.54837	0
4767	PSPPH_5059	-	hypothetical protein	-0.618268	1.54741	0
3544	PSPPH_3760	-	hypothetical protein	-0.618301	1.54716	0
737	PSPPH_0769	-	ISPsy19, transposase	-0.618444	1.54606	0
4038	PSPPH_4289	-	hypothetical protein	-0.618523	1.54546	0
1695	PSPPH_1789	-	hypothetical protein	-0.618646	1.54451	0
2883	PSPPH_3056	-	general secretion pathway protein GspM, putative	-0.618894	1.54261	0
884	PSPPH_0930	-	hypothetical protein	-0.618967	1.54205	0
928	PSPPH_0976	-	hypothetical protein	-0.618983	1.54193	0
924	PSPPH_0972	-	hypothetical protein	-0.619196	1.5403	0
525	PSPPH_0541	-	hypothetical protein	-0.620171	1.53282	0
3941	PSPPH_4183	-	hypothetical protein	-0.620204	1.53256	0
725	PSPPH_0757	-	hypothetical protein	-0.620357	1.53139	0
620	PSPPH_0640	-	hypothetical protein	-0.620385	1.53118	0
2506	PSPPH_2658	-	hypothetical protein	-0.620617	1.5294	0
69	PSPPH_0073	-	hypothetical protein	-0.620675	1.52895	0
1136	PSPPH_1192	-	hypothetical protein	-0.620846	1.52764	0
4680	PSPPH_4970	-	prophage PSPPH06, terminase, ATPase subunit, domain protein	-0.621879	1.51972	0
2100	PSPPH_2223	-	hypothetical protein	-0.622391	1.51579	0
1305	PSPPH_1373	-	hypothetical protein	-0.622418	1.51558	0
4662	PSPPH_4951	-	hypothetical protein	-0.622595	1.51422	0
215	PSPPH_0228	-	hypothetical protein	-0.62272	1.51327	0
850	PSPPH_0893	-	acyltransferase family protein	-0.622836	1.51238	0
5067	PSPPH_B0035	-	conjugal transfer protein	-0.622979	1.51128	0
908	PSPPH_0956	-	WbbD	-0.623316	1.50869	0
2778	PSPPH_2945	-	hypothetical protein	-0.623327	1.50861	0
3388	PSPPH_3594	-	hypothetical protein	-0.623392	1.50811	0
4666	PSPPH_4955	-	hypothetical protein	-0.623509	1.50721	0
1089	PSPPH_1144	-	hypothetical protein	-0.623626	1.50632	0
4376	PSPPH_4642	-	hypothetical protein	-0.623791	1.50505	0
4131	PSPPH_4386	-	hypothetical protein	-0.623929	1.50399	0
4959	PSPPH_A0047	-	conserved hypothetical protein, fusion	-0.624149	1.50231	0
2859	PSPPH_3030	-	lipoprotein, putative	-0.624271	1.50137	0
3263	PSPPH_3459	-	hypothetical protein	-0.624282	1.50129	0
1422	PSPPH_1494	-	hypothetical protein	-0.624361	1.50068	0
4289	PSPPH_4545	-	hypothetical protein	-0.624445	1.50004	0
1951	PSPPH_2065	-	crfX protein	-0.624512	1.49952	0
2681	PSPPH_2845	-	hypothetical protein	-0.624562	1.49914	0
1400	PSPPH_1470	-	hypothetical protein	-0.624563	1.49913	0
841	PSPPH_0884	-	hypothetical protein	-0.624728	1.49786	0
1921	PSPPH_2035	-	hypothetical protein	-0.62487	1.49678	0
2992	PSPPH_3179	-	hypothetical protein	-0.625026	1.49558	0
[truncated: 4,629 more rows]

## Sheet: S. flexneri
Source: Shigella flexneri 2a (AE005674, AF386526)
[truncated: 4,018 more rows]

[truncated: 2 more sheets: V. cholerae, Y. pestis]
